# Supplementary material for: Phosphine-catalyzed fixation of CO2 with γ-hydroxyl alkynone under ambient temperature and pressure: kinetic resolution and further conversion
Source: Royal Society of Chemistry journal article supplement (doi:10.1039/c9qo00642g), 2019-01-01
Supplement: c9qo00642g1.pdf [file c9qo00642g1.pdf]

## Supporting Information

### Phosphine-catalyzed fixation of CO<sub>2</sub> with $\gamma$ -hydroxyl alkynone under ambient temperature and pressure: kinetic resolution and further conversion

Yao-Liang Sun,<sup>a,b</sup> Yin Wei<sup>\*a</sup> and Min Shi<sup>\*a,b,c</sup>

a. State Key Laboratory of Organometallic Chemistry, Shanghai Institute of Organic Chemistry, Chinese Academy of Sciences, 345 Lingling Road, Shanghai 200032 China. E-mail: weiyin@sioc.ac.cn; mshi@mail.sioc.ac.cn

b. Key Laboratory for Advanced Materials and Institute of Fine Chemicals, School of Chemistry & Molecular Engineering, East China University of Science and Technology, 130 Meilong Road, Shanghai 200237, China

c. State Key Laboratory and Institute of Elemento-organic Chemistry, Nankai University, Tianjin 300071, P. R. China.

\*Correspondence: weiyin@sioc.ac.cn; mshi@mail.sioc.ac.cn

## CONTENTS

|                                                                                                                                             |      |
|---------------------------------------------------------------------------------------------------------------------------------------------|------|
| 1. General Remarks.....                                                                                                                     | S3   |
| 2. General Procedure for Synthesis of $\gamma$ -Hydroxyl Alkynone <b>1</b> and Spectroscopic Data of Substrates <b>1</b> .....              | S4   |
| 3. General Procedure for Carbon Dioxide Fixation of $\gamma$ -Hydroxyl Alkynone <b>1</b> and Spectroscopic Data of Carbonate <b>2</b> ..... | S73  |
| 4. General Procedure for Decarboxylative Cyclization of Cyclic Carbonates <b>2</b> and Spectroscopic Data of Furanones <b>3</b> .....       | S137 |
| 5. General Procedure for Synthesis of N-CP <b>1-6</b> and Spectroscopic Data of N-CP <b>1-6</b> .....                                       | S185 |
| 6. Kinetic Resolutions <i>via</i> Carbon Dioxide Fixation of $\gamma$ -Hydroxyl Alkynone <b>1</b> .....                                     | S201 |
| 7. Isotope Labeling Experiments.....                                                                                                        | S206 |

|                                                                          |      |
|--------------------------------------------------------------------------|------|
| 8. Computational Details.....                                            | S214 |
| 9. X-ray Data of <b>2a</b> , <b>3a</b> and ( <i>R</i> )- <b>1n</b> ..... | S232 |
| 10. References.....                                                      | S234 |

**1. General Remarks.**  $^1\text{H}$  NMR spectra were recorded on a Varian Mercury-300 and 400 spectrometer for solution in  $\text{CDCl}_3$  with tetramethylsilane (TMS) as an internal standard; coupling constants ( $J$ ) are given in Hz.  $^{13}\text{C}$  NMR spectra were recorded on a Varian Mercury-300 and 400 spectrophotometers (75 or 100 MHz) with complete proton decoupling spectrophotometers ( $\text{CDCl}_3$ : 77.0 ppm). Mass and HRMS spectra were recorded by EI or ESI method. Organic solvents used were dried by standard methods when necessary. Infrared spectra were recorded on a Perkin-Elmer PE-983 spectrometer with absorption in  $\text{cm}^{-1}$ . Optical rotations were determined at 589 nm (sodium D line) by using a Perkin-Elmer-341 MC digital polarimeter;  $[\alpha]_{\text{D}}$ -values are given in unit of  $10 \text{ deg}^{-1} \text{ cm}^2 \text{ g}^{-1}$ . Chiral HPLC was performed on a SHIMADZU SPD-10A *vp* series with chiral columns (Chiralpak AD-H, OD-H and AS-H columns 4.6 x 250 mm, (Daicel Chemical Ind., Ltd.)). Commercially obtained reagents were used without further purification. Melting points were determined on a digital melting point apparatus and temperatures were uncorrected. Commercially obtained reagents were used without further purification. All these reactions were monitored by TLC with silica gel coated plates. Flash column chromatography was carried out using silica gel at increased pressure.

## 2. General Procedure for Synthesis of $\gamma$ -Hydroxyl Alkynone **1** and Spectroscopic Data of Substrates **1**

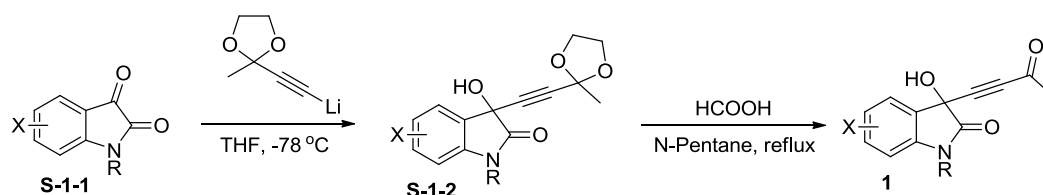

Substrates **1a-1v** and **1ac** was synthesized through the **method 1** as below.

### Method 1

**Step 1:** To a solution of 2-methyl-1,3-dioxolan-2-ylethyne (5.0 mmol, 1.0 equiv) in dry THF (20 mL) was added n-butyllithium solution (6.0 mmol, 1.2 equiv) under  $-78\text{ }^{\circ}\text{C}$  to prepare ((2-methyl-1,3-dioxolan-2-yl)ethynyl)lithium solution.<sup>1</sup> After stirring for one hour, fresh prepared ((2-methyl-1,3-dioxolan-2-yl)ethynyl)lithium (5.0 mmol, 1.0 equiv) was added to a solution of isatin derivative **S-1-1** (6.0 mmol, 1.2 equiv) in dry THF (20 mL) under  $-78\text{ }^{\circ}\text{C}$ . Then, the resulting reaction mixture was stirred at  $-78\text{ }^{\circ}\text{C}$  for one hour. After that, saturated ammonium chloride solution was added to quench the reaction. The reaction was extracted with ethyl acetate three times and washed by water. Then the reaction mixture was concentrated under high vacuum and purified by a column chromatography on silica gel to give the crude products **S-1-2** (DCM:EA = 50:1 ~ 2:1).

**Step 2:** The crude product **S-1-2** was dispersed in 50 mL n-pentane, and 1.5 mL HCOOH was added.<sup>2</sup> The reaction mixture was heated to reflux and stirred for 8 hours. After the reaction was completed, the reaction mixture was concentrated under high vacuum and purified by a column chromatography on silica gel to give the desired products **1** (DCM:EA = 50:1 ~ 2:1).

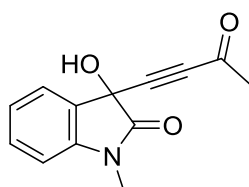

### 3-hydroxy-1-methyl-3-(3-oxobut-1-yn-1-yl)indolin-2-one (**1a**)

A white solid, 73% yield (836 mg). M.p.:  $133\text{-}135\text{ }^{\circ}\text{C}$ .  $^1\text{H}$  NMR ( $\text{CDCl}_3$ , TMS, 400 MHz)  $\delta$  2.30 (s, 3H,  $\text{CH}_3$ ), 3.22 (s, 3H,  $\text{CH}_3$ ), 5.31 (s, 1H, OH), 6.87 (d,  $J = 8.0$  Hz, 1H, ArH), 7.15 (dt,  $J = 0.8, 7.6$  Hz, 1H, ArH), 7.39 (dt,  $J = 1.2, 8.0$  Hz, 1H, ArH), 7.54 (dd,  $J = 0.4, 7.2$  Hz, 1H, ArH).  $^{13}\text{C}$  NMR

(CDCl<sub>3</sub>, TMS, 100 MHz)  $\delta$  26.7, 32.4, 69.0, 83.7, 86.6, 109.1, 124.0, 124.8, 127.4, 130.9, 142.7, 172.9, 183.8. IR (EtOH)  $\nu$  3279, 2966, 2922, 2218, 1711, 1678, 1493, 1376, 1196 cm<sup>-1</sup>. HRMS (ESI) Calcd. For C<sub>13</sub>H<sub>15</sub>N<sub>2</sub>O<sub>3</sub><sup>+</sup>(M+NH<sub>4</sub>)<sup>+</sup> requires 247.1077, Found: 247.1075.

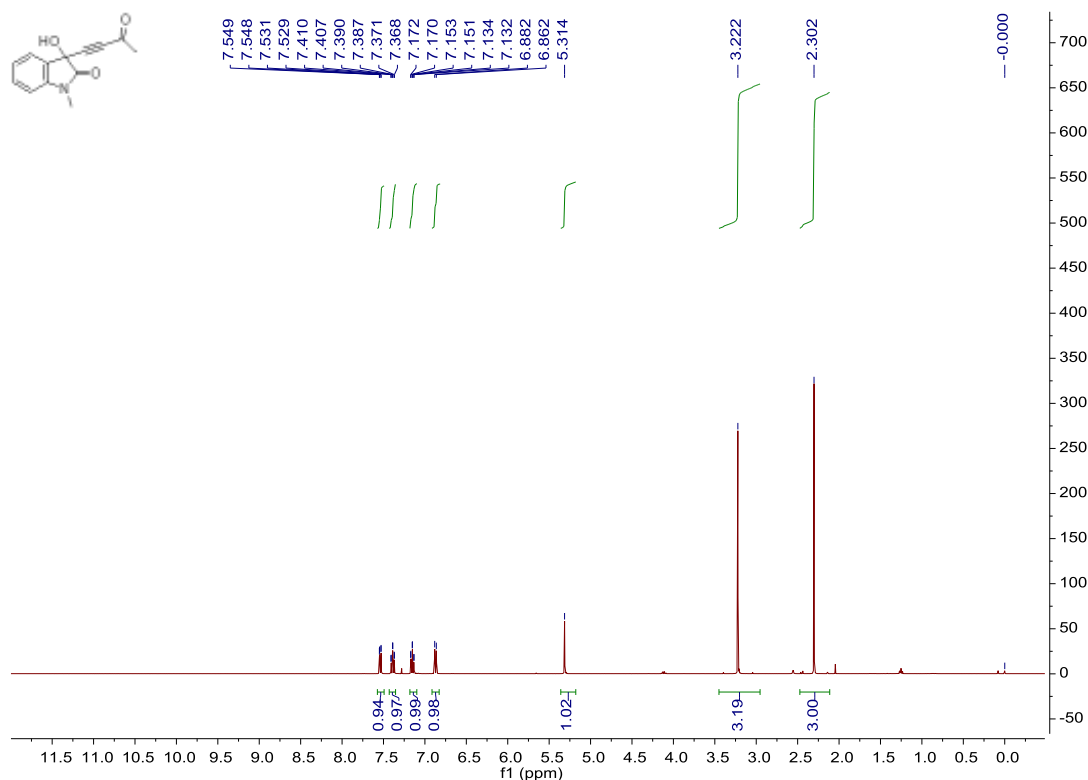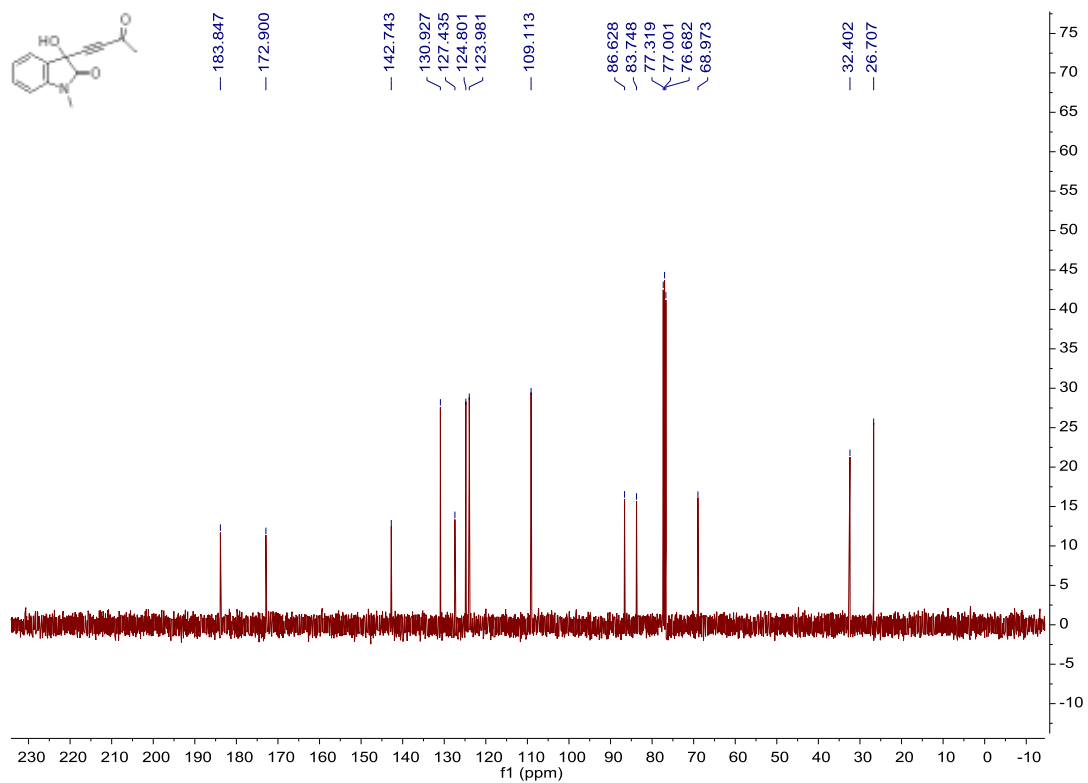

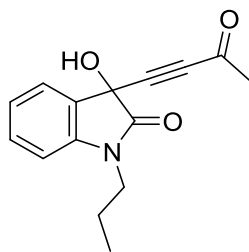

### 3-hydroxy-3-(3-oxobut-1-yn-1-yl)-1-propylindolin-2-one (1b)

A white solid, 74% yield (951 mg). M.p.: 110-112 °C.  $^1\text{H}$  NMR ( $\text{CDCl}_3$ , TMS, 400 MHz)  $\delta$  0.98 (t,  $J = 7.6$  Hz, 3H,  $\text{CH}_3$ ), 1.69-1.79 (m, 2H,  $\text{CH}_2$ ), 2.32 (s, 3H,  $\text{CH}_3$ ), 3.68 (t,  $J = 6.8$  Hz, 2H,  $\text{CH}_2$ ), 4.98 (br, 1H, OH), 6.89 (d,  $J = 7.6$  Hz, 1H, ArH), 7.15 (t,  $J = 7.6$  Hz, 1H, ArH), 7.38 (dt,  $J = 0.8, 8.0$  Hz, 1H, ArH), 7.55 (d,  $J = 7.6$  Hz, 1H, ArH).  $^{13}\text{C}$  NMR ( $\text{CDCl}_3$ , TMS, 100 MHz)  $\delta$  11.2, 20.5, 32.5, 42.2, 69.0, 83.8, 86.7, 109.4, 123.8, 125.1, 127.5, 130.9, 142.3, 173.0, 183.8. IR (EtOH)  $\nu$  3287, 2969, 2872, 2207, 1703, 1674, 1466, 1189, 1108, 669  $\text{cm}^{-1}$ . HRMS (ESI) Calcd. For  $\text{C}_{15}\text{H}_{19}\text{N}_2\text{O}_3^+ (\text{M}+\text{NH}_4)^+$  requires 275.1390, Found: 275.1387.  $[\alpha]_D^{25} = +68.00$  (c 0.05,  $\text{CH}_2\text{Cl}_2$ ) for 97% *ee*; Enantiomeric excess was determined by HPLC with a Chiralcel AS-H column, Hexane/ $i$ PrOH = 90/10, 0.7 mL/min, 254 nm,  $t_{\text{minor}} = 46.383$  min,  $t_{\text{major}} = 25.977$  min.

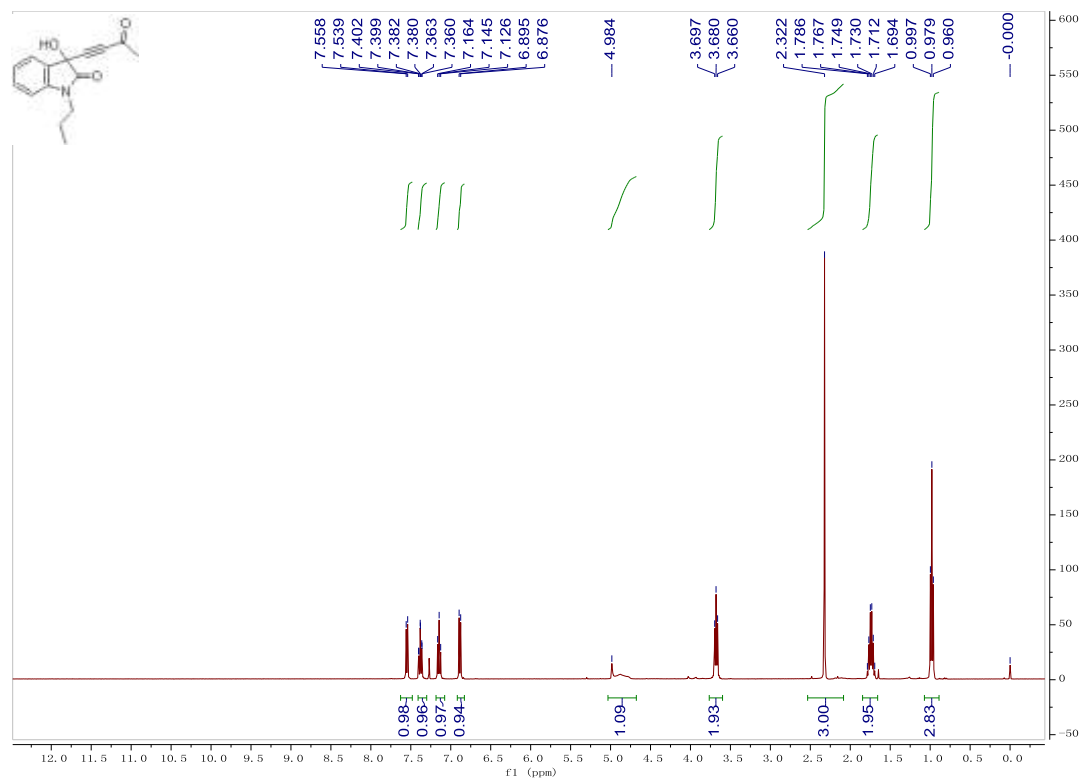

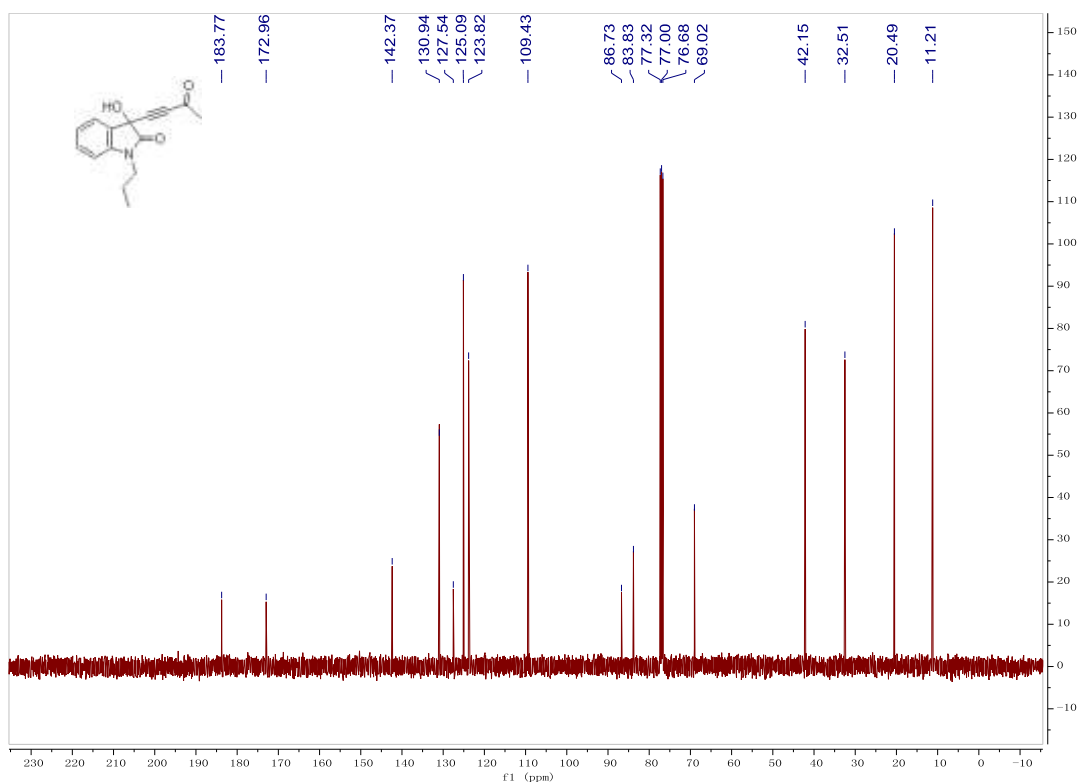

实验时间: 2018-4-27, 14:41:00  
谱图文件: D:\Sun Yaoliang\co2\18-11-b-rac.org

实验者:  
报告时间: 2018-4-27, 16:44:07  
积分方法: 面积归一法

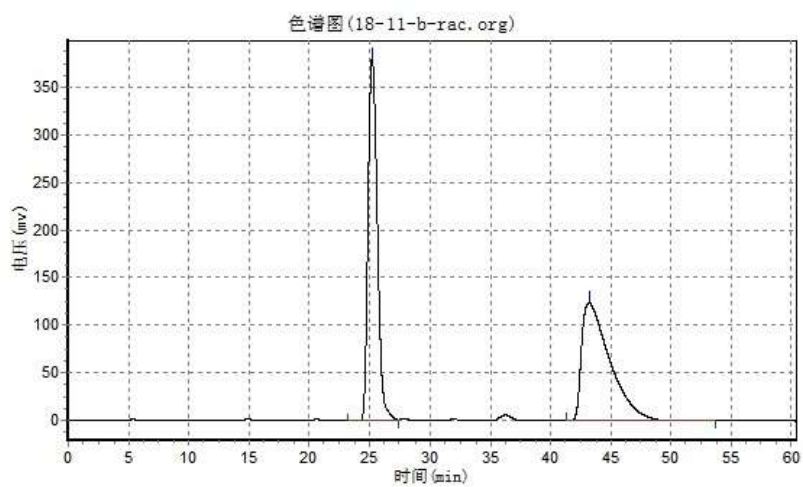

分析结果表

| 峰号 | 峰名 | 保留时间   | 峰高         | 峰面积          | 含量       |
|----|----|--------|------------|--------------|----------|
| 1  |    | 25.290 | 378700.375 | 20434366.000 | 50.2396  |
| 2  |    | 43.190 | 123873.281 | 20239482.000 | 49.7604  |
| 总计 |    |        | 502573.656 | 40673848.000 | 100.0000 |

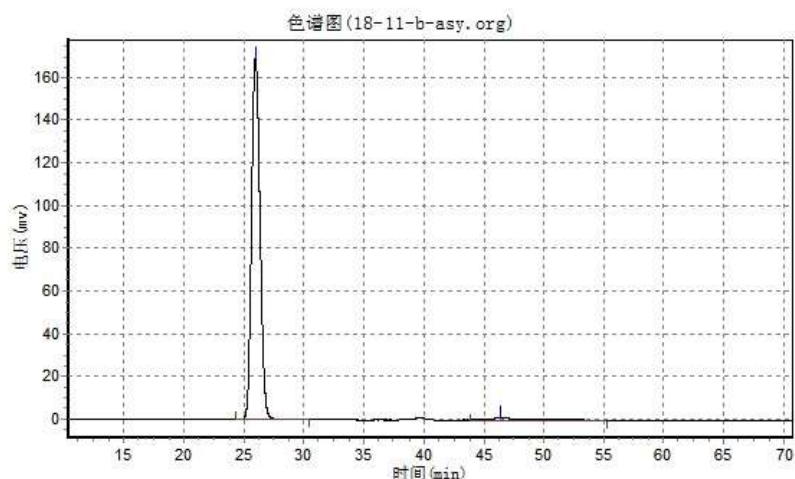

分析结果表

| 峰号 | 峰名 | 保留时间   | 峰高         | 峰面积         | 含量       |
|----|----|--------|------------|-------------|----------|
| 1  |    | 25.977 | 169132.375 | 8330152.500 | 98.2198  |
| 2  |    | 46.383 | 925.511    | 150979.453  | 1.7802   |
| 总计 |    |        | 170057.886 | 8481131.953 | 100.0000 |

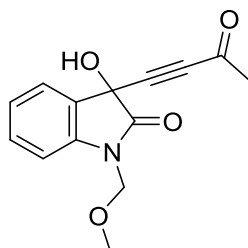

### 3-hydroxy-1-methyl-3-(3-oxobut-1-yn-1-yl)indolin-2-one (1c)

A white solid, 57% yield (738 mg). M.p.: 141-143 °C.  $^1\text{H}$  NMR ( $\text{CDCl}_3$ , TMS, 400 MHz)  $\delta$  2.31 (s, 3H,  $\text{CH}_3$ ), 3.36 (s, 3H,  $\text{CH}_3$ ), 5.14 (s, 2H,  $\text{CH}_2$ ), 5.17 (s, 1H, OH), 7.08 (d,  $J = 8.0$  Hz, 1H, ArH), 7.19 (t,  $J = 7.6$  Hz, 1H, ArH), 7.40 (t,  $J = 7.6$  Hz, 1H, ArH), 7.56 (d,  $J = 7.2$  Hz, 1H, ArH).  $^{13}\text{C}$  NMR ( $\text{CDCl}_3$ , TMS, 100 MHz)  $\delta$  32.4, 56.4, 69.2, 71.9, 84.1, 86.2, 110.6, 124.4, 125.0, 127.0, 131.1, 141.1, 173.4, 183.7. IR (EtOH)  $\nu$  3311, 3000, 2935, 2207, 1728, 1614, 1471, 1366, 1204, 1072  $\text{cm}^{-1}$ . HRMS (ESI) Calcd. For  $\text{C}_{14}\text{H}_{17}\text{N}_2\text{O}_4^{+1}(\text{M}+\text{NH}_4)^+$  requires 277.1183, Found: 277.1179.  $[\alpha]_D^{25} = +112.50$  (c 0.04,  $\text{CH}_2\text{Cl}_2$ ) for 81% *ee*; Enantiomeric excess was determined by HPLC with a Chiralcel AS-H column, Hexane/*i*PrOH = 90/10, 0.7 mL/min, 254 nm,  $t_{\text{minor}} = 55.812$  min,  $t_{\text{major}} = 32.023$  min.



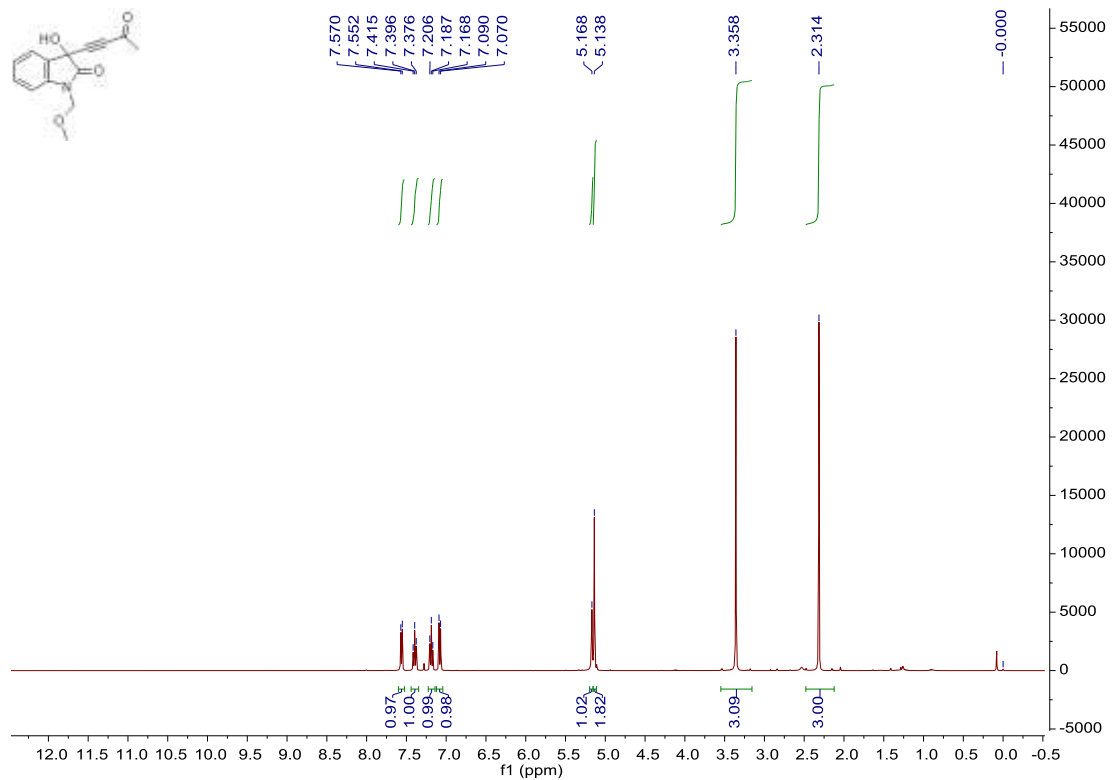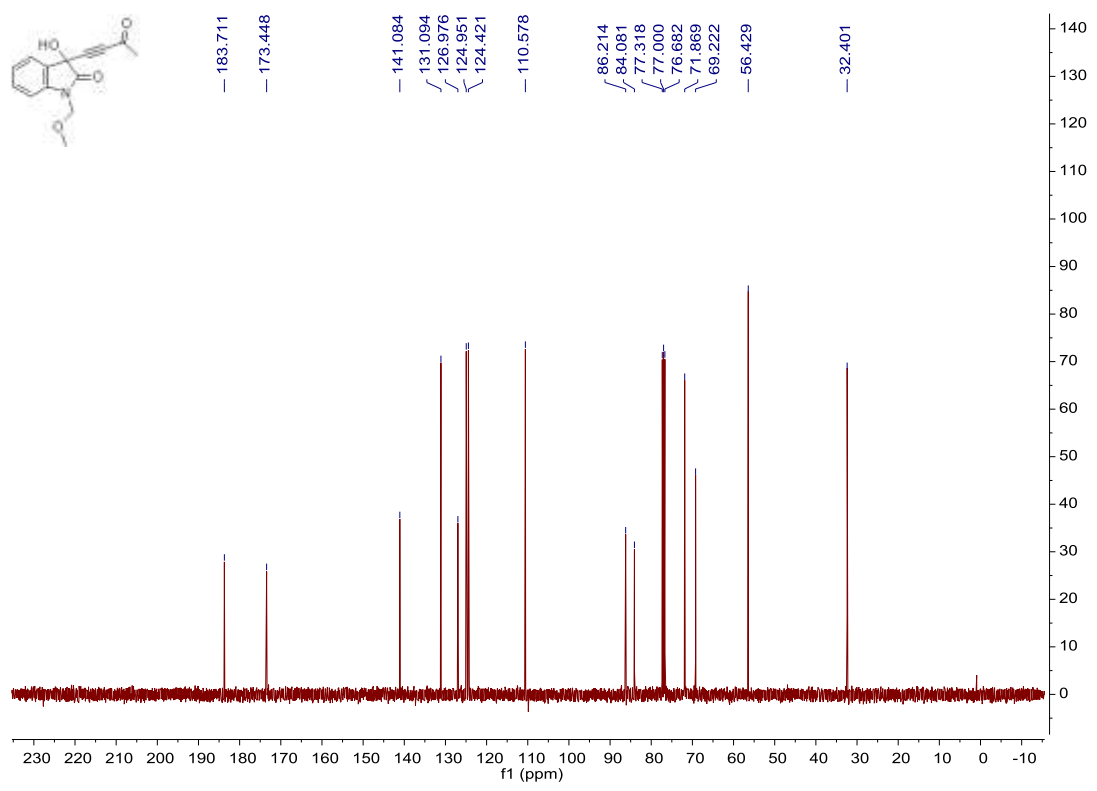

实验时间: 2018-04-26, 16:20:25  
谱图文件: D:\Sun Yaoliang\co2\18-8-b-rac-AS-H-90+10.org

实验者:  
报告时间: 2018-04-26, 16:20:55  
积分方法: 面积归一法

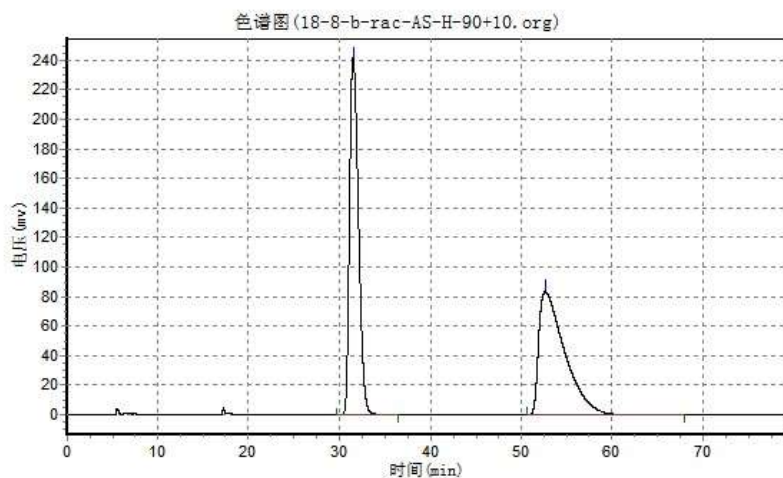

分析结果表

| 峰号 | 峰名 | 保留时间   | 峰高         | 峰面积          | 含量       |
|----|----|--------|------------|--------------|----------|
| 1  |    | 31.598 | 242109.688 | 16645834.000 | 49.8346  |
| 2  |    | 52.665 | 83539.641  | 16756354.000 | 50.1654  |
| 总计 |    |        | 325649.328 | 33402188.000 | 100.0000 |

实验时间: 2018-04-26, 18:26:08  
谱图文件: D:\Sun Yaoliang\co2\18-8-b-asy-AS-H-90+10.org

实验者:  
报告时间: 2018-04-26, 18:28:18  
积分方法: 面积归一法

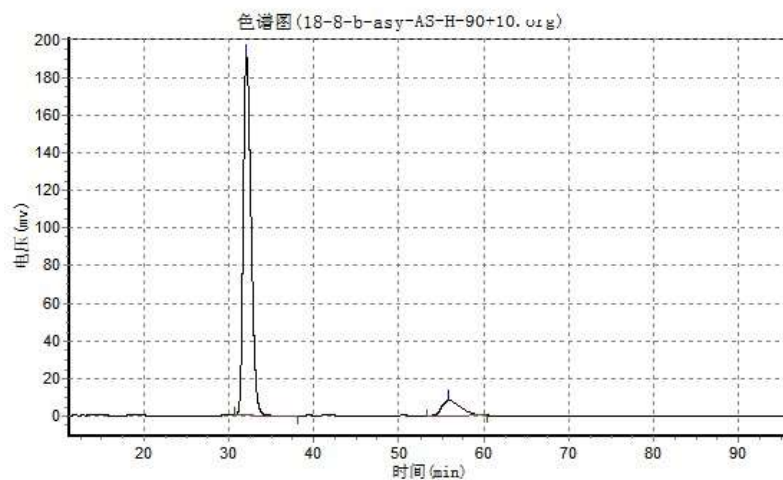

分析结果表

| 峰号 | 峰名 | 保留时间   | 峰高         | 峰面积          | 含量       |
|----|----|--------|------------|--------------|----------|
| 1  |    | 32.023 | 191044.844 | 12272868.000 | 90.3516  |
| 2  |    | 55.812 | 8216.794   | 1310586.125  | 9.6484   |
| 总计 |    |        | 199261.638 | 13583454.125 | 100.0000 |

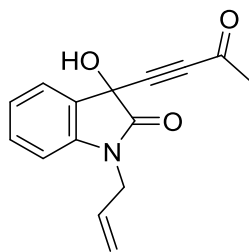

### 1-allyl-3-hydroxy-3-(3-oxobut-1-yn-1-yl)indolin-2-one (1d)

A white solid, 81% yield (1033 mg). M.p.: 127-129 °C.  $^1\text{H}$  NMR ( $\text{CDCl}_3$ , TMS, 400 MHz)  $\delta$  2.34 (s, 3H,  $\text{CH}_3$ ), 4.34 (d,  $J = 5.2$  Hz, 2H,  $\text{CH}_2$ ), 4.74 (br, 1H, OH), 5.25-5.30 (m, 2H,  $=\text{CH}_2$ ), 5.79-5.89 (m, 1H,  $=\text{CH}$ ), 6.87 (d,  $J = 8.0$  Hz, 1H, ArH), 7.15 (t,  $J = 7.6$  Hz, 1H, ArH), 7.37 (t,  $J = 7.6$  Hz, 1H, ArH), 7.55 (d,  $J = 7.2$  Hz, 1H, ArH).  $^{13}\text{C}$  NMR ( $\text{CDCl}_3$ , TMS, 100 MHz)  $\delta$  32.5, 42.9, 69.0, 84.0, 86.4, 110.0, 118.3, 124.0, 125.0, 127.3, 130.3, 131.0, 142.1, 172.7, 183.7. IR (EtOH)  $\nu$  3316, 2215, 1707, 1675, 1611, 1463, 1364, 1217, 1178, 1098, 929, 760  $\text{cm}^{-1}$ . HRMS (ESI) Calcd. For  $\text{C}_{15}\text{H}_{17}\text{N}_2\text{O}_3^{+1}(\text{M}+\text{NH}_4)^+$  requires 273.1234, Found: 273.1229.  $[\alpha]_D^{25} = +40.83$  (c 0.04,  $\text{CH}_2\text{Cl}_2$ ) for 97% *ee*; Enantiomeric excess was determined by HPLC with a Chiralcel AD-H column, Hexane/ $i$ PrOH = 90/10, 0.7 mL/min, 254 nm,  $t_{\text{minor}} = 28.675$  min,  $t_{\text{major}} = 25.345$  min.

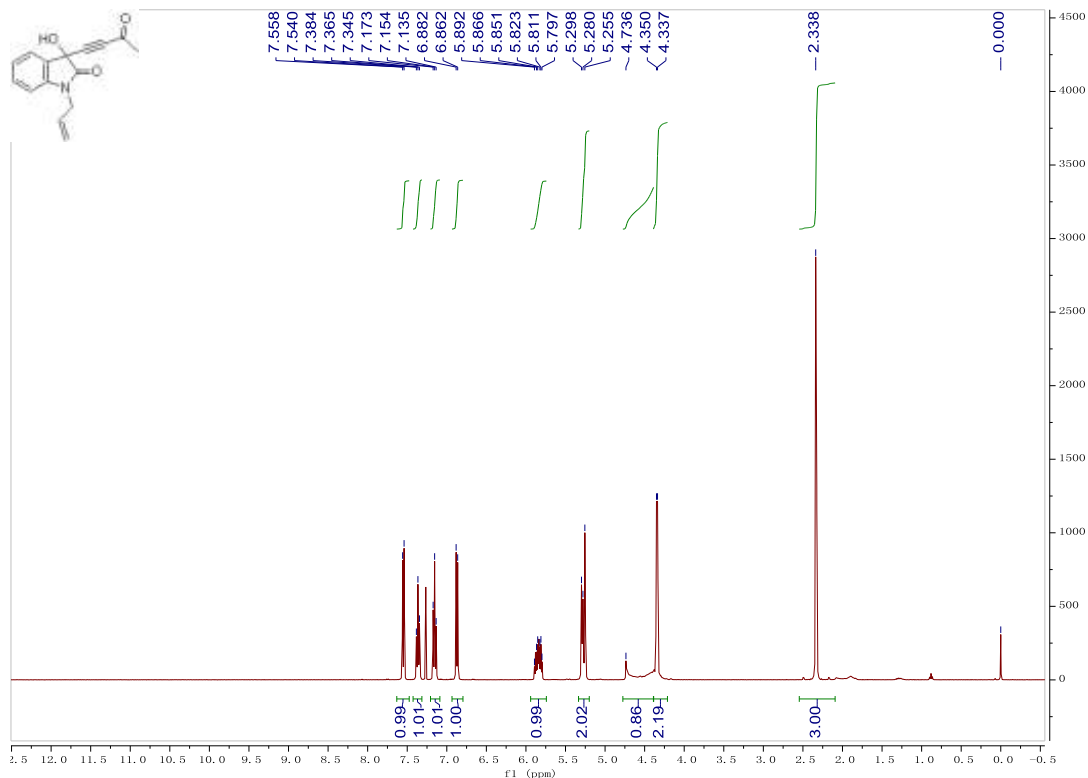

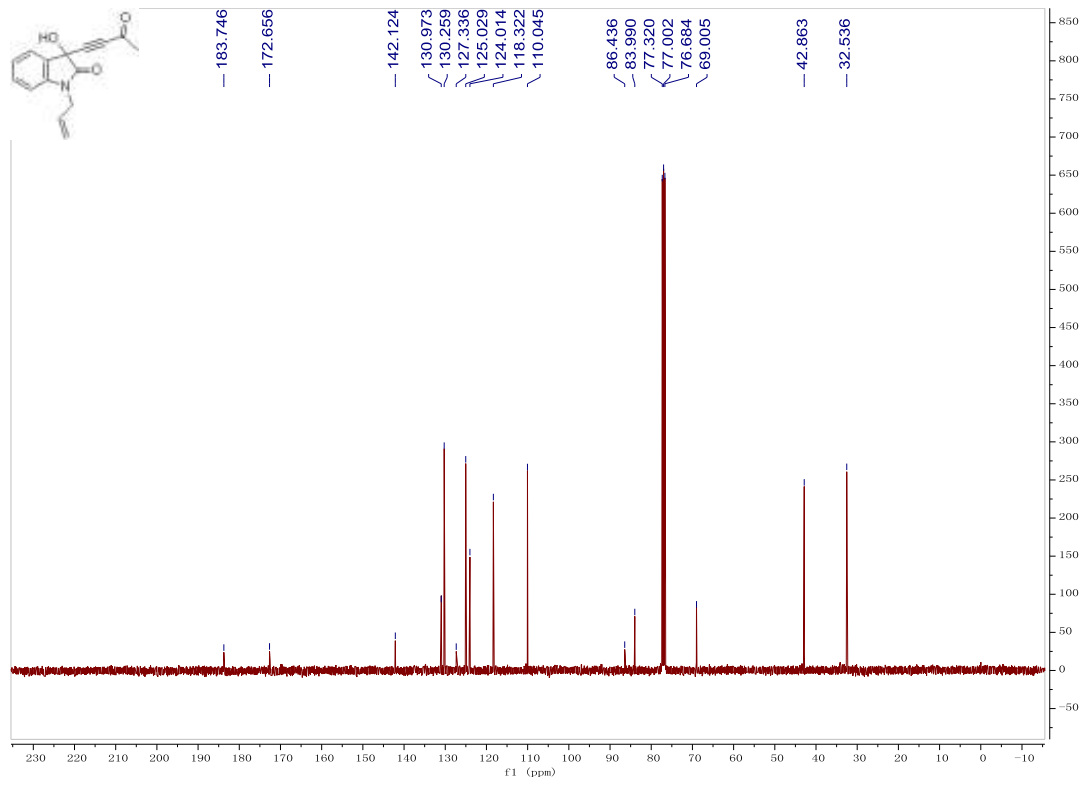

实验时间: 2018-04-24, 15:44:38  
 谱图文件: D:\Sun Yaoliang\co2\18-b-b-rac.org

实验者:  
 任务时间: 2018-04-24, 16:29:07  
 积分方法: 面积归一法

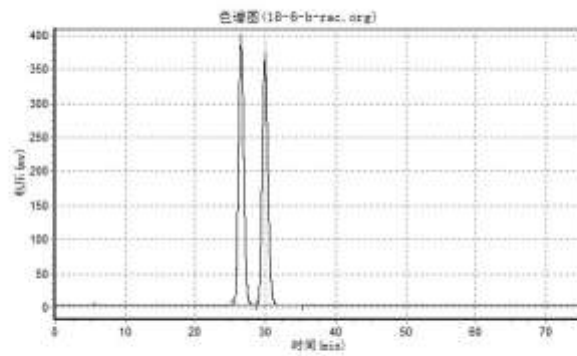

分析结果表

| 峰号 | 峰名 | 保留时间   | 峰高         | 峰面积          | 含量       |
|----|----|--------|------------|--------------|----------|
| 1  |    | 26.690 | 385728.063 | 20800110.000 | 89.9266  |
| 2  |    | 30.007 | 359168.780 | 20861286.000 | 80.0734  |
| 总计 |    |        | 744896.813 | 41661396.000 | 100.0000 |

实验时间: 2018-04-24, 16:37:23  
谱图文件: D:\Sun Yaoliang\cn7\18-0-b-nay.org

谱图名称:  
实验时间: 2018-04-24, 16:37:23  
分析方法: 面积归一法

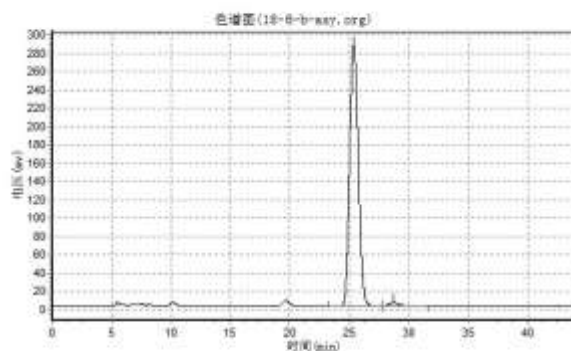

| 分析结果表 |    |        |            |              |          |
|-------|----|--------|------------|--------------|----------|
| 峰号    | 峰名 | 保留时间   | 峰高         | 峰面积          | 含量       |
| 1     |    | 25.345 | 335400.460 | 14651953.000 | 98.3192  |
| 2     |    | 28.675 | 3604.895   | 250483.297   | 1.6808   |
| 总计    |    |        | 289014.354 | 14902436.297 | 100.0000 |

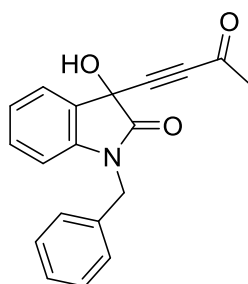

### 1-benzyl-3-hydroxy-3-(3-oxobut-1-yn-1-yl)indolin-2-one (1e)

A white solid, 76% yield (1159 mg). M.p.: 151-153 °C.  $^1\text{H}$  NMR ( $\text{CDCl}_3$ , TMS, 400 MHz)  $\delta$  2.36 (s, 3H,  $\text{CH}_3$ ), 3.87 (br, 1H, OH), 4.89 (d,  $J = 15.6$  Hz, 1H,  $\text{CH}_2$ ), 4.94 (d,  $J = 15.6$  Hz, 1H,  $\text{CH}_2$ ), 6.75 (d,  $J = 8.0$  Hz, 1H, ArH), 7.12 (dt,  $J = 0.8, 7.6$  Hz, 1H, ArH), 7.28-7.37 (m, 5H, ArH), 7.54 (dd,  $J = 0.4, 7.2$  Hz, 1H, ArH).  $^{13}\text{C}$  NMR ( $\text{CDCl}_3$ , TMS, 100 MHz)  $\delta$  32.6, 44.3, 69.1, 84.1, 86.3, 110.2, 124.1, 125.0, 127.1, 127.2, 128.0, 129.0, 131.0, 134.5, 142.1, 172.9, 183.6. IR (EtOH)  $\nu$  3305, 3055, 2922, 2207, 1705, 1676, 1376, 1175, 1071, 987, 698  $\text{cm}^{-1}$ . HRMS (ESI) Calcd. For  $\text{C}_{19}\text{H}_{19}\text{N}_2\text{O}_3$   $^{+1}(\text{M}+\text{NH}_4)^+$  requires 323.1390, Found: 323.1384.  $[\alpha]_{\text{D}}^{25} = +37.78$  (c 0.09,  $\text{CH}_2\text{Cl}_2$ ) for 91% *ee*; Enantiomeric excess was determined by HPLC with a Chiralcel AD-H column, Hexane/*i*PrOH = 90/10, 0.7 mL/min, 254 nm,  $t_{\text{minor}} = 46.708$  min,  $t_{\text{major}} = 29.184$  min.

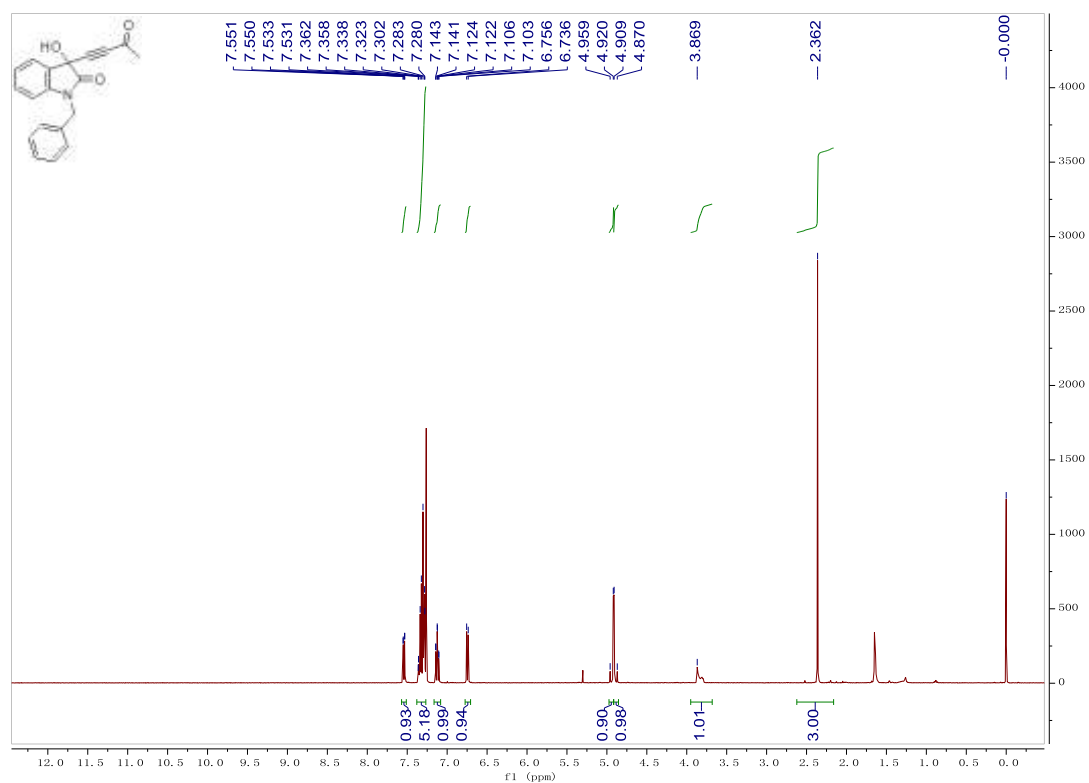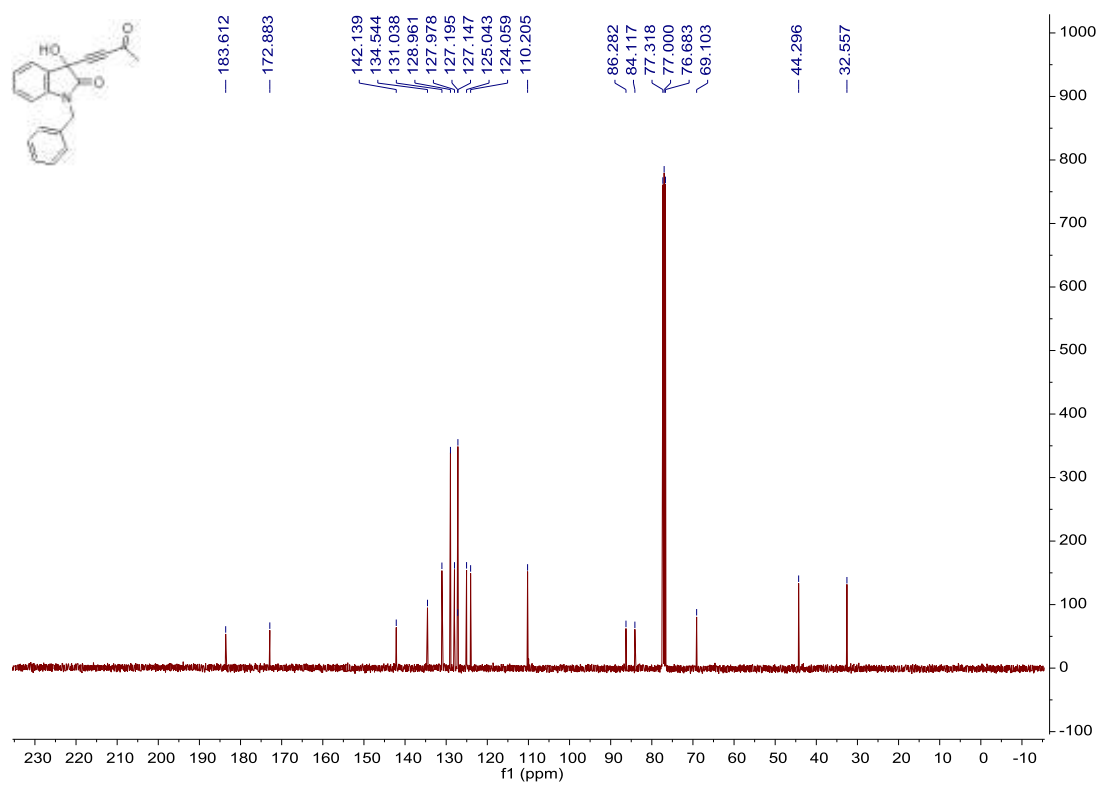

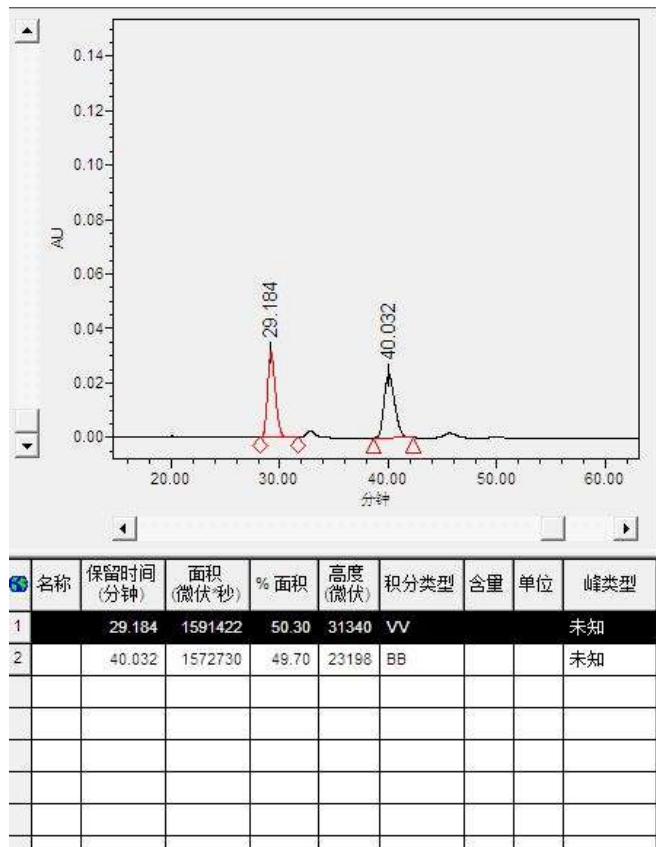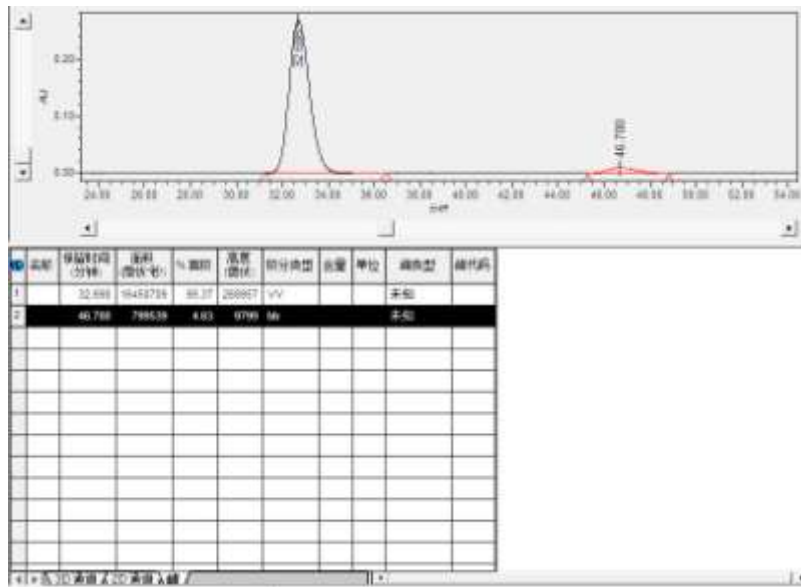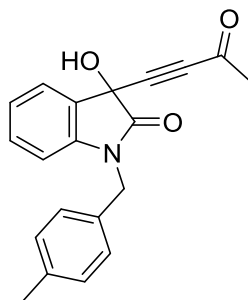

S15

### 3-hydroxy-1-(4-methylbenzyl)-3-(3-oxobut-1-yn-1-yl)indolin-2-one (1f)

A white solid, 82% yield (1324 mg). M.p.: 121-123 °C.  $^1\text{H}$  NMR ( $\text{CDCl}_3$ , TMS, 400 MHz)  $\delta$  2.31 (s, 3H,  $\text{CH}_3$ ), 2.35 (d,  $J = 1.6$  Hz, 3H,  $\text{CH}_3$ ), 4.15 (br, 1H, OH), 4.85 (d,  $J = 16.0$  Hz, 1H,  $\text{CH}_2$ ), 4.89 (d,  $J = 16.0$  Hz, 1H,  $\text{CH}_2$ ), 6.75 (d,  $J = 8.0$  Hz, 1H, ArH), 7.09-7.20 (m, 5H, ArH), 7.25-7.30 (m, 1H, ArH), 7.53 (d,  $J = 7.6$  Hz, 1H, ArH).  $^{13}\text{C}$  NMR ( $\text{CDCl}_3$ , TMS, 100 MHz)  $\delta$  21.1, 32.6, 44.1, 69.1, 84.1, 86.3, 110.2, 124.0, 125.0, 127.2, 129.6, 131.0, 131.5, 137.7, 142.2, 172.8, 183.6. IR (EtOH)  $\nu$  3243, 2919, 2867, 2220, 1716, 1363, 1208, 1170  $\text{cm}^{-1}$ . HRMS (ESI) Calcd. For  $\text{C}_{20}\text{H}_{21}\text{N}_2\text{O}_3$   $^+(\text{M}+\text{NH}_4)^+$  requires 337.1547, Found: 337.1540.  $[\alpha]_D^{25} = +83.33$  (c 0.04,  $\text{CH}_2\text{Cl}_2$ ) for 80% *ee*; Enantiomeric excess was determined by HPLC with a Chiralcel AD-H column, Hexane/*i*PrOH = 90/10, 0.7 mL/min, 254 nm,  $t_{\text{minor}} = 37.917$  min,  $t_{\text{major}} = 26.560$  min.

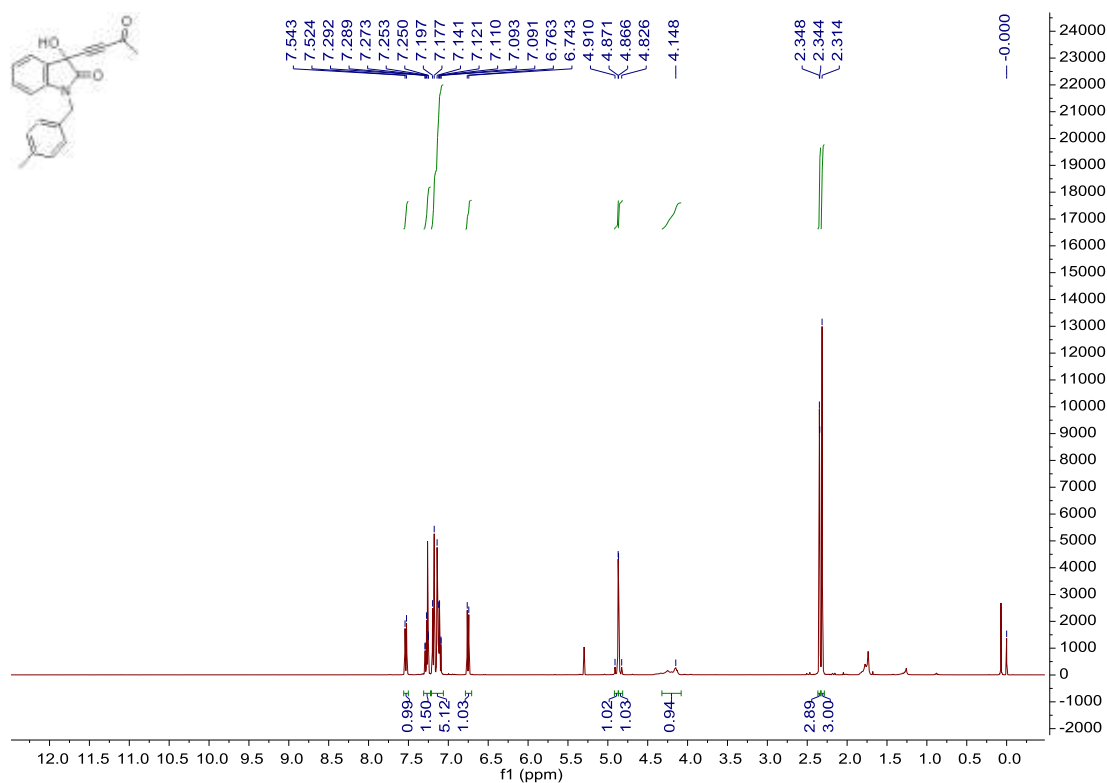



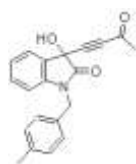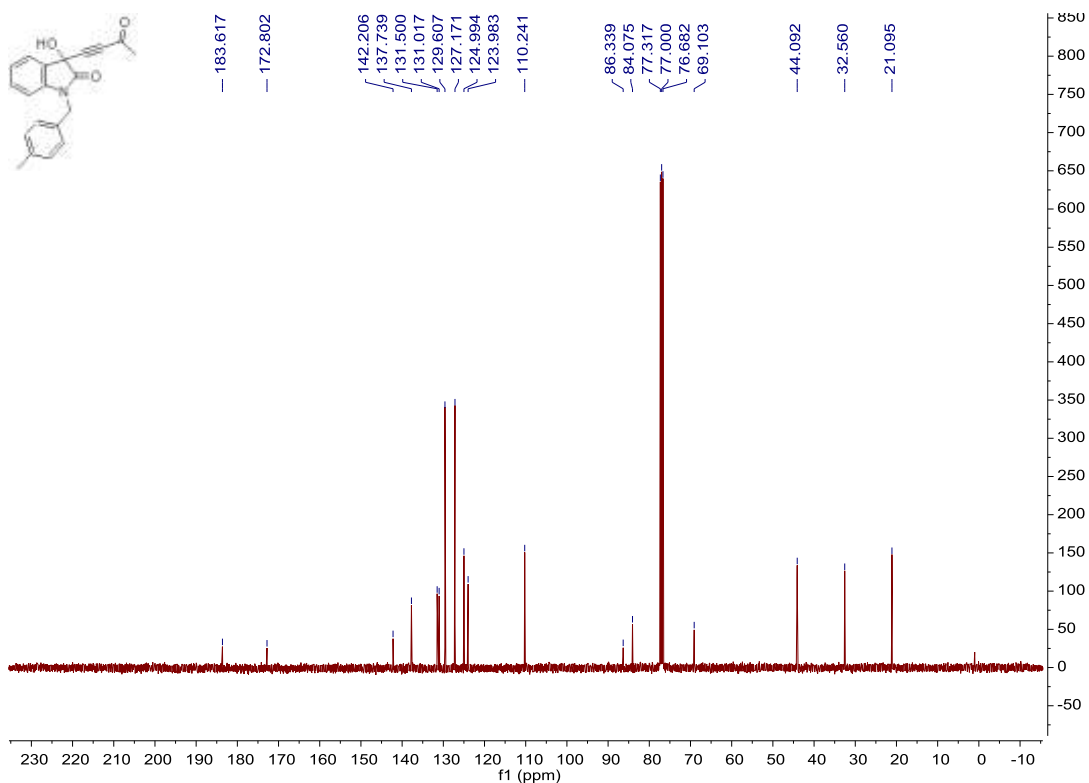

实验时间: 2018-04-20, 13:55:17  
谱图文件:D:\Sun Yanliang\cod\18-1-b-rac.org

实验者:  
数据采集时间: 2018-04-20, 13:58:20  
积分方法: 面积归一法

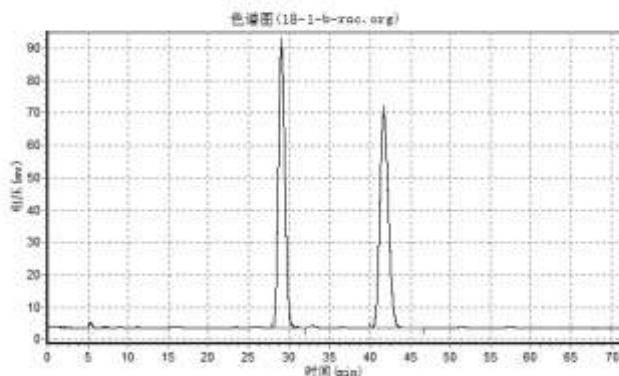

**分析结果表**

| 峰号 | 峰名 | 保留时间   | 峰高         | 峰面积         | 含量       |
|----|----|--------|------------|-------------|----------|
| 1  |    | 29.107 | 86808.516  | 4914594.500 | 49.8646  |
| 2  |    | 41.707 | 66132.703  | 4941276.000 | 50.1354  |
| 总计 |    |        | 162941.219 | 9855870.500 | 100.0000 |

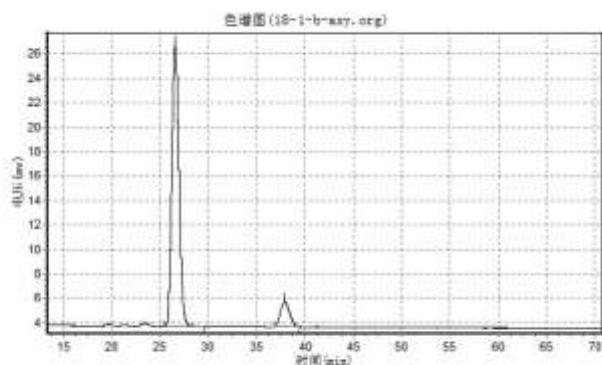

| 分析结果表 |    |        |           |             |          |
|-------|----|--------|-----------|-------------|----------|
| 峰号    | 峰名 | 保留时间   | 峰高        | 峰面积         | 含量       |
| 1     |    | 28.752 | 23081.146 | 1191191.790 | 89.7802  |
| 2     |    | 37.917 | 2053.476  | 135594.469  | 10.2198  |
| 总计    |    |        | 25134.623 | 1326786.259 | 100.0000 |

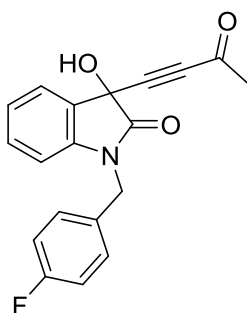

### 1-(4-fluorobenzyl)-3-hydroxy-3-(3-oxobut-1-yn-1-yl)indolin-2-one (1g)

A white solid, 77% yield (1244 mg). M.p.: 123-125 °C. <sup>1</sup>H NMR (CDCl<sub>3</sub>, TMS, 400 MHz) δ 2.35 (s, 3H, CH<sub>3</sub>), 4.27 (br, 1H, OH), 4.85 (d, *J* = 16.0 Hz, 1H, CH<sub>2</sub>), 4.91 (d, *J* = 16.0 Hz, 1H, CH<sub>2</sub>), 6.74 (d, *J* = 7.6 Hz, 1H, ArH), 6.99-7.06 (m, 2H, ArH), 7.14 (dt, *J* = 0.8, 7.6 Hz, 1H, ArH), 7.25-7.32 (m, 3H, ArH), 7.55 (dd, *J* = 0.8, 7.6 Hz, 1H, ArH). <sup>13</sup>C NMR (CDCl<sub>3</sub>, TMS, 100 MHz) δ 32.5, 43.6, 69.1, 84.2, 86.1, 110.0, 115.9 (d, *J* = 21.6 Hz), 124.2, 125.2, 127.2, 129.0 (d, *J* = 8.2 Hz), 130.3 (d, *J* = 3.2 Hz), 131.1, 141.9, 162.4 (d, *J* = 245.3 Hz), 172.9, 183.6. <sup>19</sup>F NMR (376 MHz, CDCl<sub>3</sub>, CFC1<sub>3</sub>) -114.01-(-113.93). IR (EtOH) ν 3254, 2973, 2920, 2222, 1712, 1507, 1156, 993, 817 cm<sup>-1</sup>. HRMS (ESI) Calcd. For C<sub>19</sub>H<sub>18</sub>FN<sub>2</sub>O<sub>3</sub><sup>+1</sup>(M+NH<sub>4</sub>)<sup>+</sup> requires 341.1296, Found: 341.1291. [ $\alpha$ ]<sub>D</sub><sup>25</sup> = +86.67 (c 0.02, CH<sub>2</sub>Cl<sub>2</sub>) for 93% *ee*; Enantiomeric excess was determined by HPLC with a Chiralcel AD-H column, Hexane/*i*PrOH = 90/10, 0.7 mL/min, 254 nm, *t*<sub>minor</sub> = 38.917 min, *t*<sub>major</sub> = 28.752 min.

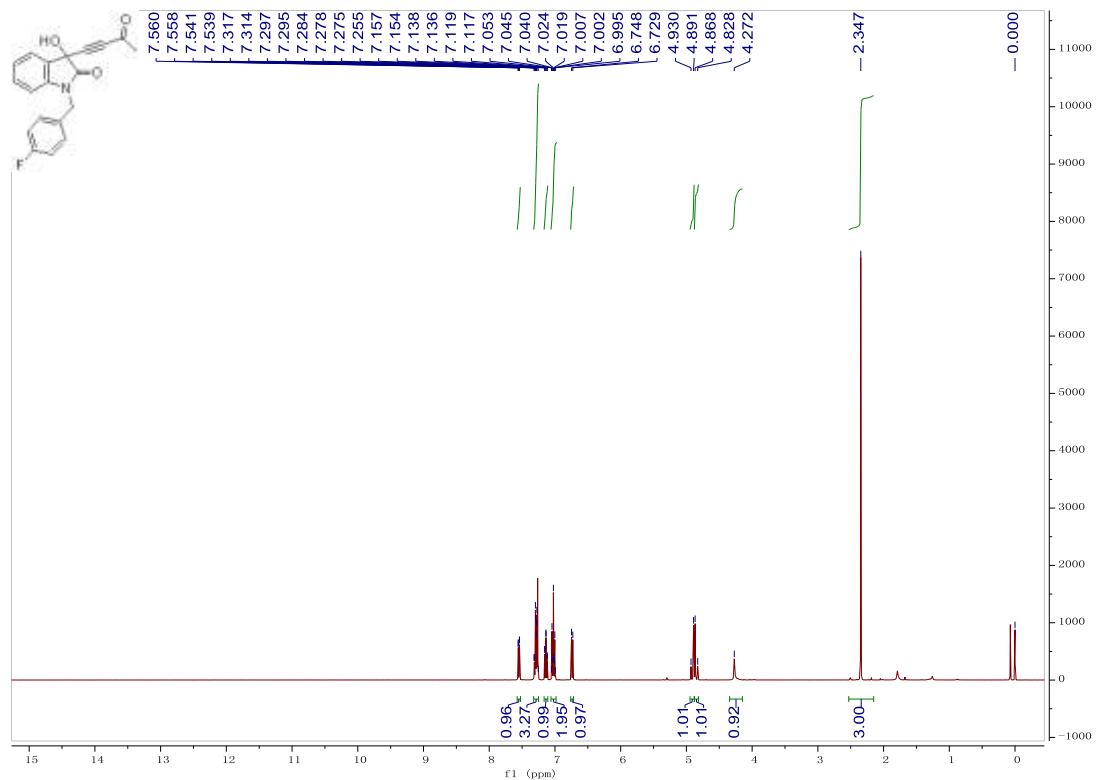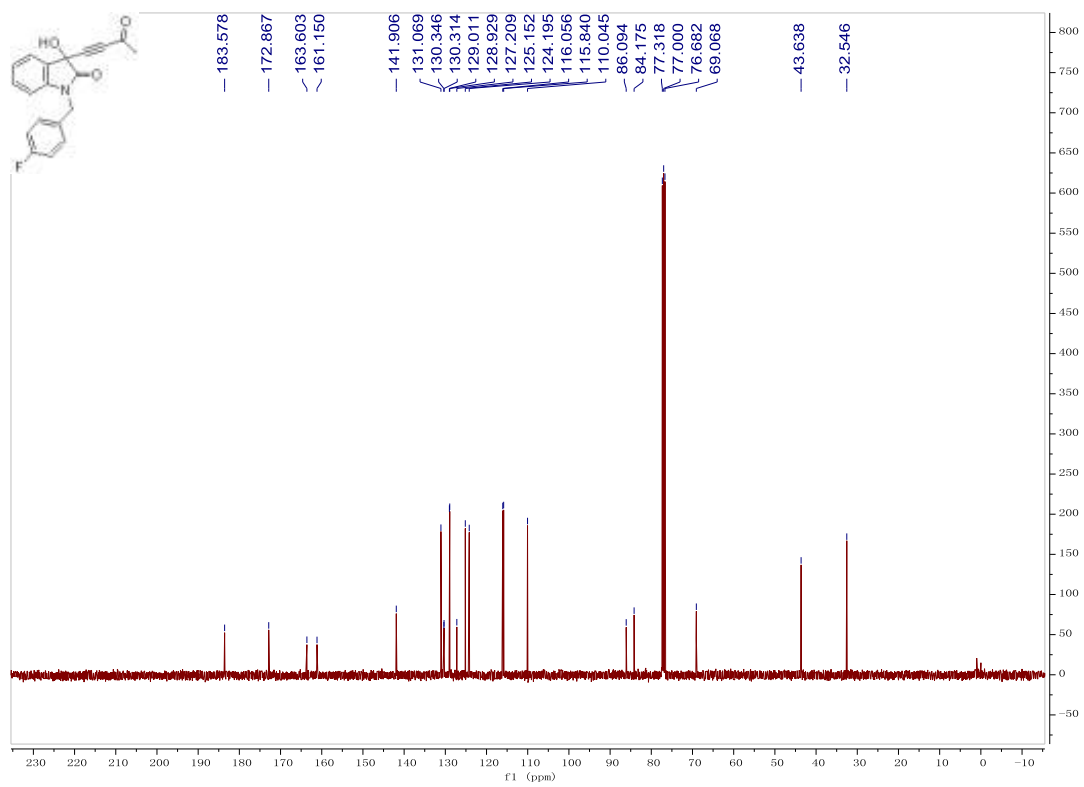

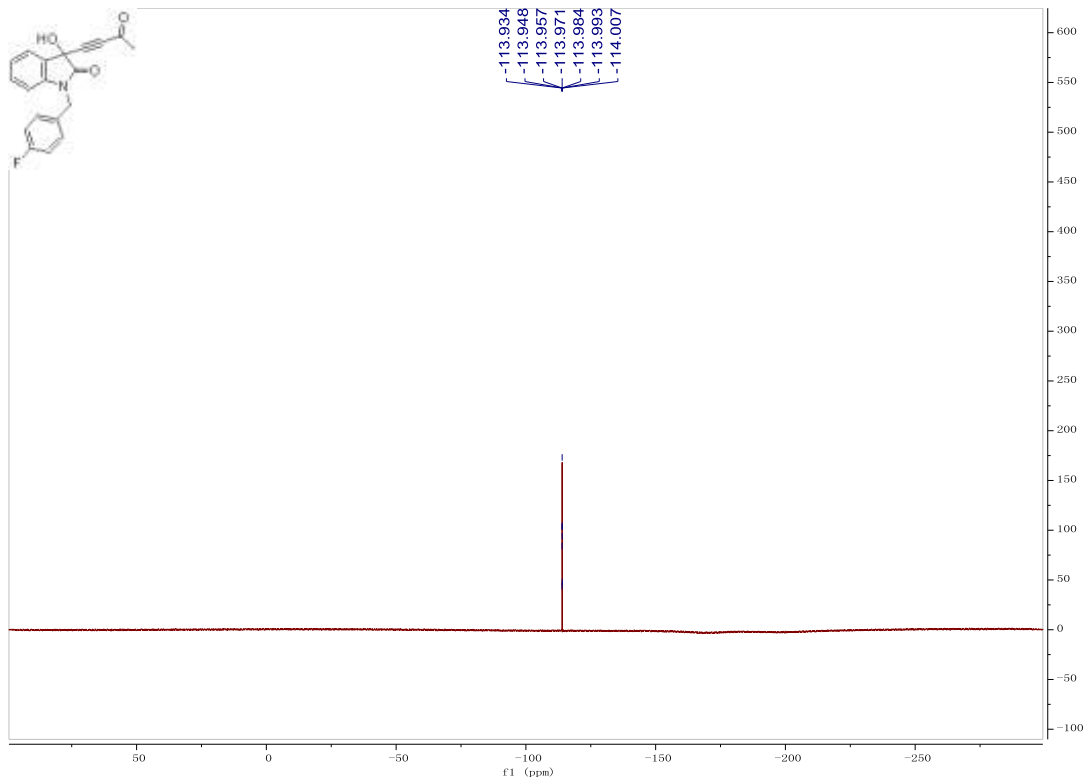

实验时间: 2019-07-19, 16:11:39  
谱图文件: D:\Sun Yaoliang\co2\17-97-b-rac.org

实验者:  
报告时间: 2019-07-19, 16:59:08  
积分方法: 面积归一法

色谱图 (17-97-b-rac.org)

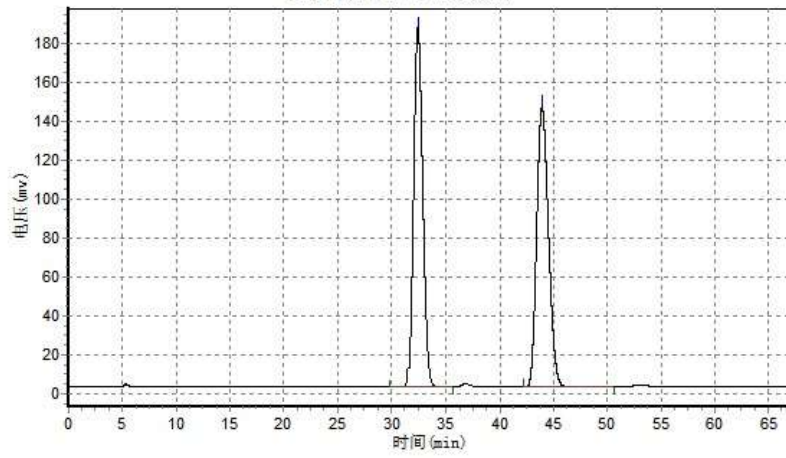

分析结果表

| 峰号 | 峰名 | 保留时间   | 峰高         | 峰面积          | 含量       |
|----|----|--------|------------|--------------|----------|
| 1  |    | 32.398 | 184619.297 | 10880568.000 | 49.7444  |
| 2  |    | 43.932 | 143730.984 | 10992389.000 | 50.2556  |
| 总计 |    |        | 328350.281 | 21872957.000 | 100.0000 |

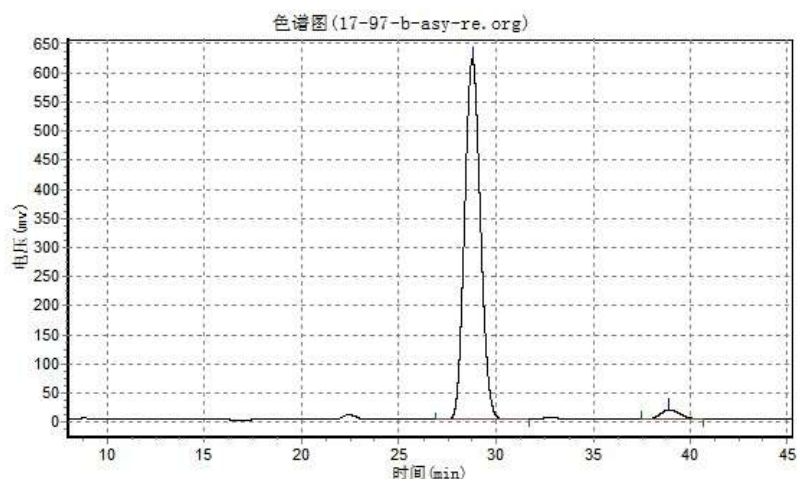

分析结果表

| 峰号 | 峰名 | 保留时间   | 峰高         | 峰面积          | 含量       |
|----|----|--------|------------|--------------|----------|
| 1  |    | 28.752 | 621475.375 | 35178936.000 | 96.6531  |
| 2  |    | 38.917 | 16365.487  | 1218182.375  | 3.3469   |
| 总计 |    |        | 637840.862 | 36397118.375 | 100.0000 |

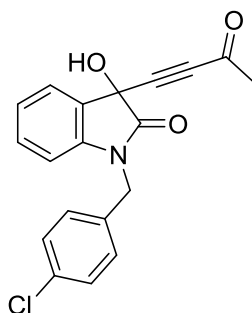

### 1-(4-chlorobenzyl)-3-hydroxy-3-(3-oxobut-1-yn-1-yl)indolin-2-one (1h)

A white solid, 78% yield (1322 mg). M.p.: 147-149 °C. <sup>1</sup>H NMR (CDCl<sub>3</sub>, TMS, 400 MHz) δ 2.36 (s, 3H, CH<sub>3</sub>), 3.92 (s, 1H, OH), 4.84 (d, *J* = 15.6 Hz, 1H, CH<sub>2</sub>), 4.91 (d, *J* = 15.6 Hz, 1H, CH<sub>2</sub>), 6.71 (d, *J* = 8.0 Hz, 1H, ArH), 7.14 (dt, *J* = 0.8, 7.6 Hz, 1H, ArH), 7.22-7.33 (m, 5H, ArH), 7.55 (dd, *J* = 0.8, 7.6 Hz, 1H, ArH). <sup>13</sup>C NMR (CDCl<sub>3</sub>, TMS, 100 MHz) δ 32.6, 43.7, 69.0, 84.2, 85.9, 110.0, 124.2, 125.2, 127.1, 128.6, 129.2, 131.1, 133.1, 133.9, 141.9, 172.7, 183.5. IR (EtOH) ν 3235, 2927, 2210, 1713, 1672, 1610, 1486, 1366, 1209, 1171, 805 cm<sup>-1</sup>. HRMS (ESI) Calcd. For C<sub>19</sub>H<sub>18</sub>ClN<sub>2</sub>O<sub>3</sub><sup>+1</sup>(M+NH<sub>4</sub>)<sup>+</sup> requires 357.1000, Found: 357.0997. [α]<sub>D</sub><sup>25</sup> = +27.50 (c 0.04, CH<sub>2</sub>Cl<sub>2</sub>) for 76% *ee*; Enantiomeric excess was determined by HPLC with a Chiralcel AD-H column, Hexane/*i*PrOH = 90/10, 0.7 mL/min, 254 nm, *t*<sub>minor</sub> = 40.981 min, *t*<sub>major</sub> = 28.868 min.

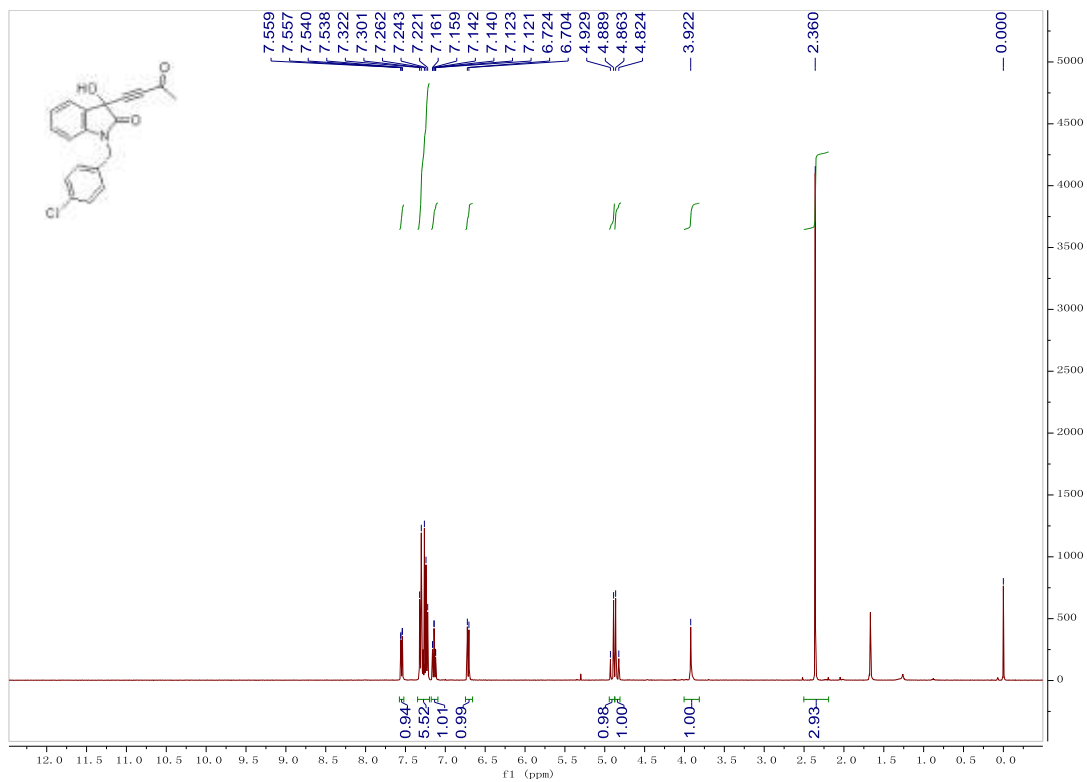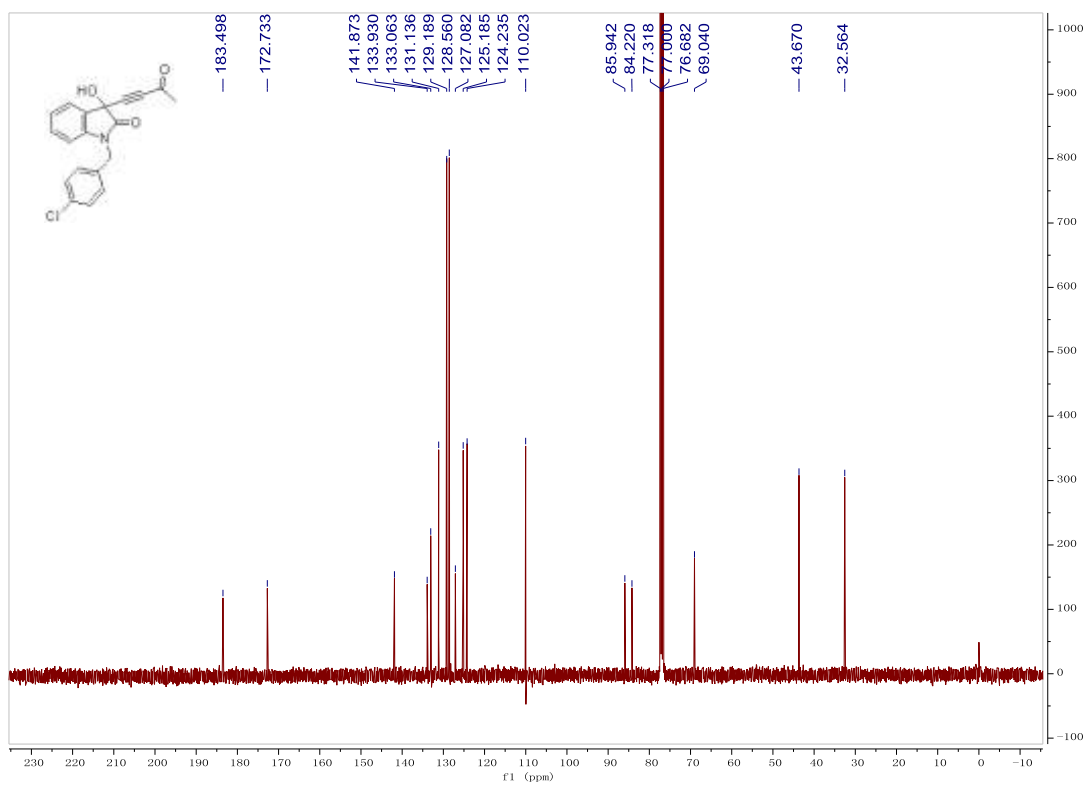

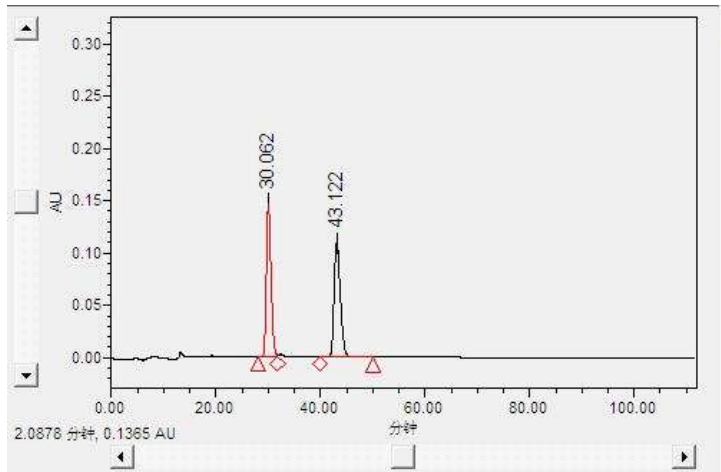

| 名称 | 保留时间<br>(分钟) | 面积<br>(微伏·秒) | % 面积  | 高度<br>(微伏) | 积分类型 | 含量 | 单位 | 峰类型 | 峰代码 |
|----|--------------|--------------|-------|------------|------|----|----|-----|-----|
| 1  | 30.062       | 9093420      | 49.79 | 147386     | BV   |    |    | 未知  |     |
| 2  | 43.122       | 9169395      | 50.21 | 109423     | VB   |    |    | 未知  |     |
|    |              |              |       |            |      |    |    |     |     |
|    |              |              |       |            |      |    |    |     |     |
|    |              |              |       |            |      |    |    |     |     |
|    |              |              |       |            |      |    |    |     |     |
|    |              |              |       |            |      |    |    |     |     |
|    |              |              |       |            |      |    |    |     |     |
|    |              |              |       |            |      |    |    |     |     |
|    |              |              |       |            |      |    |    |     |     |

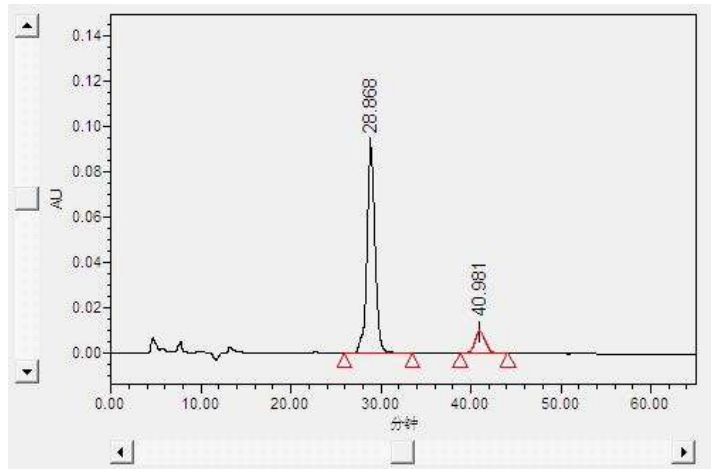

| 名称 | 保留时间<br>(分钟) | 面积<br>(微伏·秒) | % 面积  | 高度<br>(微伏) | 积分类型 | 含量 | 单位 | 峰类型 | 峰代码 |
|----|--------------|--------------|-------|------------|------|----|----|-----|-----|
| 1  | 28.868       | 5734753      | 87.74 | 90501      | BB   |    |    | 未知  |     |
| 2  | 40.981       | 800974       | 12.26 | 9859       | BB   |    |    | 未知  |     |
|    |              |              |       |            |      |    |    |     |     |
|    |              |              |       |            |      |    |    |     |     |
|    |              |              |       |            |      |    |    |     |     |
|    |              |              |       |            |      |    |    |     |     |
|    |              |              |       |            |      |    |    |     |     |
|    |              |              |       |            |      |    |    |     |     |
|    |              |              |       |            |      |    |    |     |     |
|    |              |              |       |            |      |    |    |     |     |

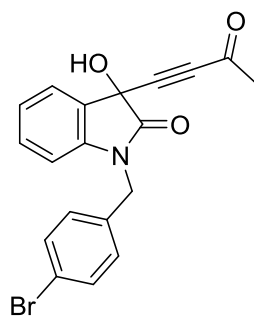

### 1-(4-bromobenzyl)-3-hydroxy-3-(3-oxobut-1-yn-1-yl)indolin-2-one (**1i**)

A white solid, 60% yield (1149 mg). M.p.: 152-154 °C.  $^1\text{H}$  NMR ( $\text{CDCl}_3$ , TMS, 400 MHz)  $\delta$  2.35 (s, 3H,  $\text{CH}_3$ ), 4.15 (s, 1H, OH), 4.83 (d,  $J = 15.6$  Hz, 1H,  $\text{CH}_2$ ), 4.89 (d,  $J = 15.6$  Hz, 1H,  $\text{CH}_2$ ), 6.71 (d,  $J = 8.0$  Hz, 1H, ArH), 7.12-7.19 (m, 3H, ArH), 7.29 (dt,  $J = 0.8, 7.6$  Hz, 1H, ArH), 7.46 (d,  $J = 8.4$  Hz, 2H, ArH), 7.55 (d,  $J = 7.6$  Hz, 1H, ArH).  $^{13}\text{C}$  NMR ( $\text{CDCl}_3$ , TMS, 100 MHz)  $\delta$  32.6, 43.7, 69.0, 84.2, 86.0, 110.0, 122.0, 124.3, 125.2, 127.2, 128.9, 131.1, 132.1, 133.6, 141.8, 172.8, 183.5. IR (EtOH)  $\nu$  3240, 2931, 2368, 2328, 2208, 1714, 1672, 1486, 1365, 1232m 1171, 744  $\text{cm}^{-1}$ . HRMS (ESI) Calcd. For  $\text{C}_{19}\text{H}_{18}\text{BrN}_2\text{O}_3^+(\text{M}+\text{NH}_4)^+$  requires 401.0495, Found: 401.0490.  $[\alpha]_D^{25} = +114.17$  (c 0.04,  $\text{CH}_2\text{Cl}_2$ ) for 83% *ee*; Enantiomeric excess was determined by HPLC with a Chiralcel AD-H column, Hexane/*i*PrOH = 90/10, 0.7 mL/min, 254 nm,  $t_{\text{minor}} = 56.769$  min,  $t_{\text{major}} = 39.460$  min.

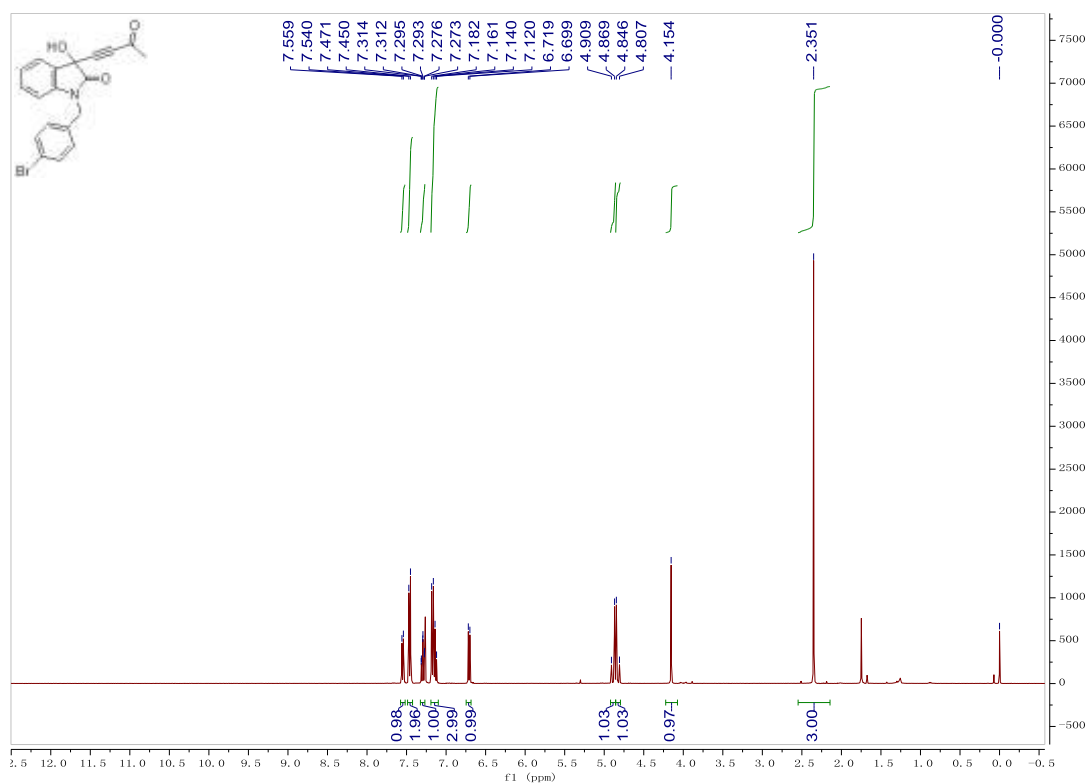



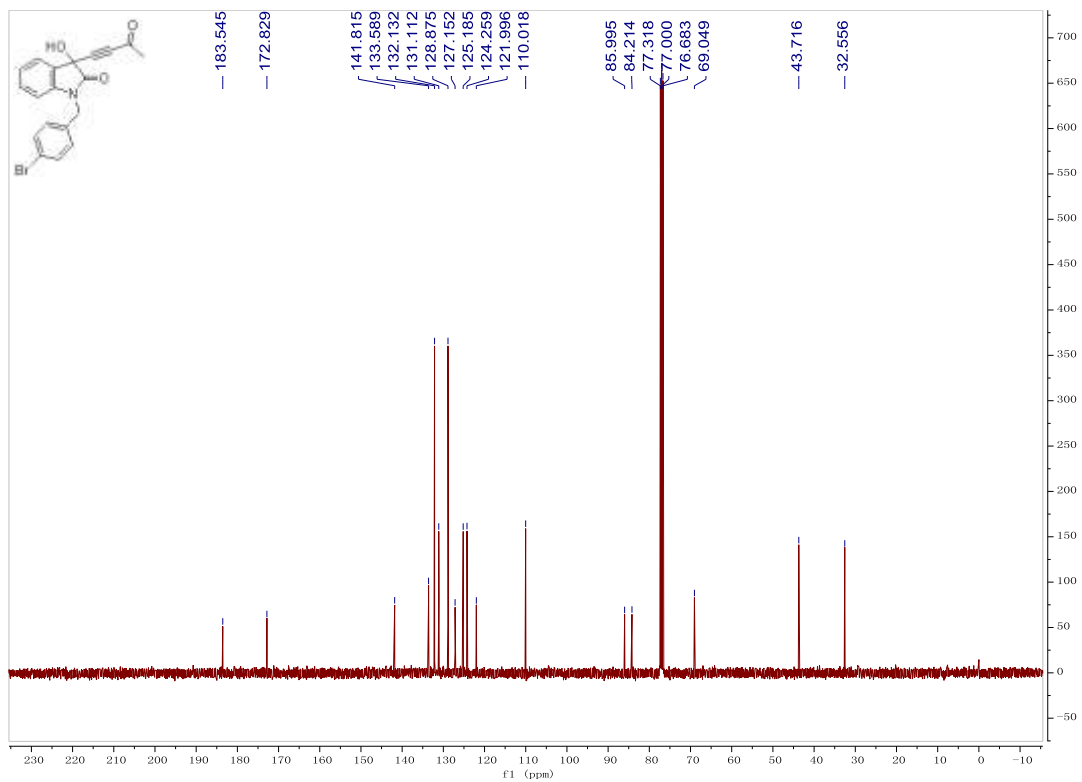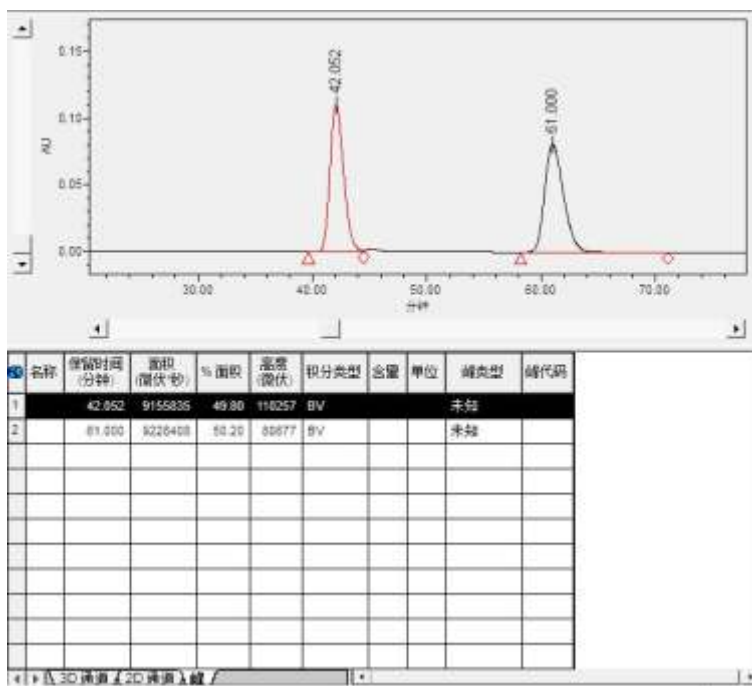

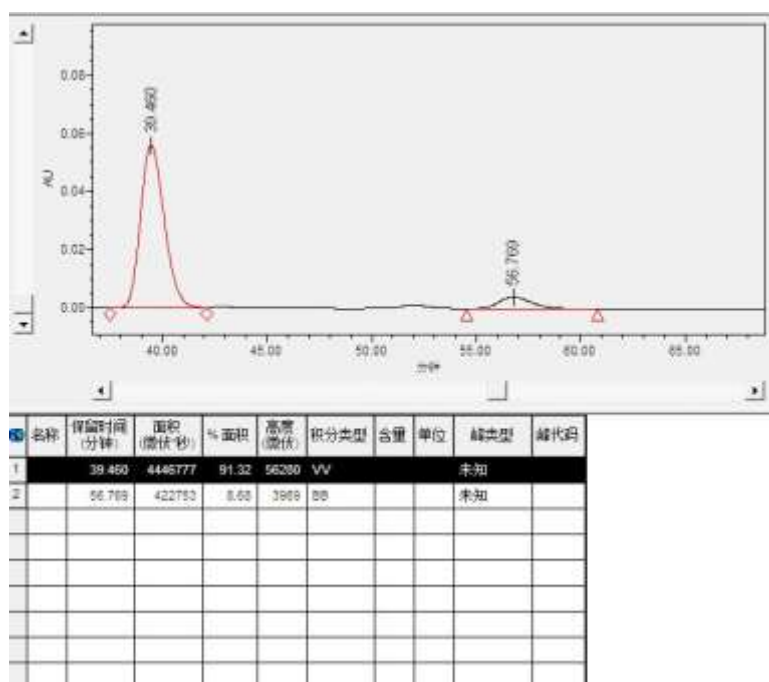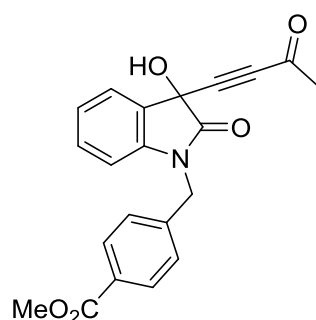

**methyl 4-((3-hydroxy-2-oxo-3-(3-oxobut-1-yn-1-yl)indolin-1-yl)methyl)benzoate (1j)**

A white solid, 42% yield (387 mg). M.p.: 148-150 °C. <sup>1</sup>H NMR (CDCl<sub>3</sub>, TMS, 400 MHz) δ 2.34 (s, 3H, CH<sub>3</sub>), 3.90 (s, 3H, CH<sub>3</sub>), 4.74 (s, 1H, OH), 4.93 (d, *J* = 16.0 Hz, 1H, CH<sub>2</sub>), 4.99 (d, *J* = 16.0 Hz, 1H, CH<sub>2</sub>), 6.68 (d, *J* = 7.6 Hz, 1H, ArH), 7.13 (t, *J* = 7.6 Hz, 1H, ArH), 7.25-7.30 (m, 1H, ArH), 7.36 (d, *J* = 8.0 Hz, 2H, ArH), 7.56 (d, *J* = 7.2 Hz, 1H, ArH), 8.00 (d, *J* = 8.4 Hz, 2H, ArH). <sup>13</sup>C NMR (CDCl<sub>3</sub>, TMS, 100 MHz) δ 32.5, 44.0, 52.2, 69.1, 84.2, 86.1, 110.0, 124.3, 125.1, 127.0, 127.3, 129.8, 130.2, 131.0, 139.7, 141.7, 166.6, 173.0, 183.6. IR (EtOH) ν 3269, 2951, 2930, 2212, 1710, 1674, 1612, 1275, 1169 cm<sup>-1</sup>. HRMS (ESI) Calcd. For C<sub>21</sub>H<sub>21</sub>N<sub>2</sub>O<sub>5</sub><sup>+1</sup>(M+NH<sub>4</sub>)<sup>+</sup> requires 381.1445, Found: 381.1440.

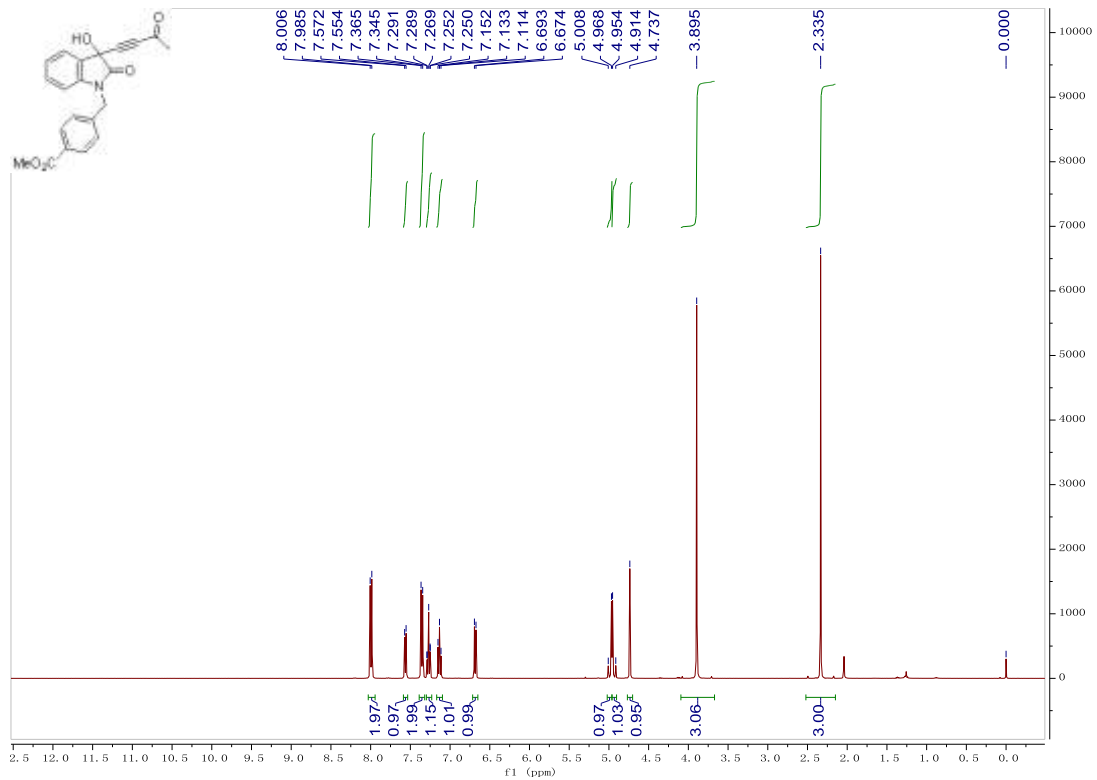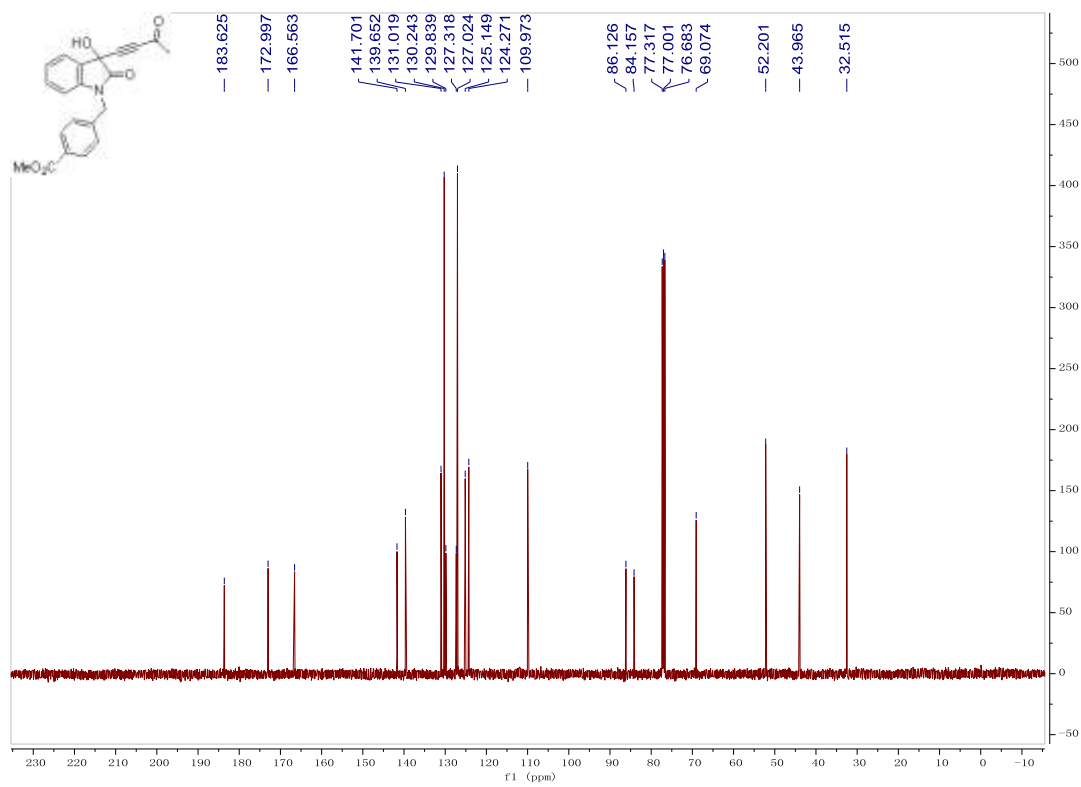

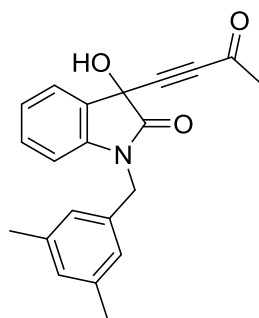

**1-(3,5-dimethylbenzyl)-3-hydroxy-3-(3-oxobut-1-yn-1-yl)indolin-2-one (1k)**

A white solid, 86% yield (1431 mg). M.p.: 131-133 °C.  $^1\text{H}$  NMR ( $\text{CDCl}_3$ , TMS, 400 MHz)  $\delta$  2.27 (s, 6H,  $\text{CH}_3$ ), 2.33 (s, 3H,  $\text{CH}_3$ ), 4.42 (s, 1H, OH), 4.83 (s, 2H,  $\text{CH}_2$ ), 6.77 (d,  $J = 8.0$  Hz, 1H, ArH), 6.89-6.91 (m, 3H, ArH), 7.12 (t,  $J = 7.6$  Hz, 1H, ArH), 7.28 (t,  $J = 7.6$  Hz, 1H, ArH), 7.54 (d,  $J = 7.6$  Hz, 1H, ArH).  $^{13}\text{C}$  NMR ( $\text{CDCl}_3$ , TMS, 100 MHz)  $\delta$  21.3, 32.5, 44.3, 69.1, 84.1, 86.5, 110.3, 124.0, 124.9, 127.2, 129.6, 131.0, 134.4, 138.5, 142.3, 172.9, 183.6. IR (EtOH)  $\nu$  3290, 2917, 2854, 2215, 1716, 1611, 1362, 1211, 1171, 859  $\text{cm}^{-1}$ . HRMS (ESI) Calcd. For  $\text{C}_{21}\text{H}_{23}\text{N}_2\text{O}_3$  $^{+1}(\text{M}+\text{NH}_4)^+$  requires 351.1703, Found: 351.1697.  $[\alpha]_{\text{D}}^{25} = +24.17$  (c 0.04,  $\text{CH}_2\text{Cl}_2$ ) for 56% *ee*; Enantiomeric excess was determined by HPLC with a Chiralcel AD-H column, Hexane/*i*PrOH = 90/10, 0.7 mL/min, 254 nm,  $t_{\text{minor}} = 20.088$  min,  $t_{\text{major}} = 18.733$  min.

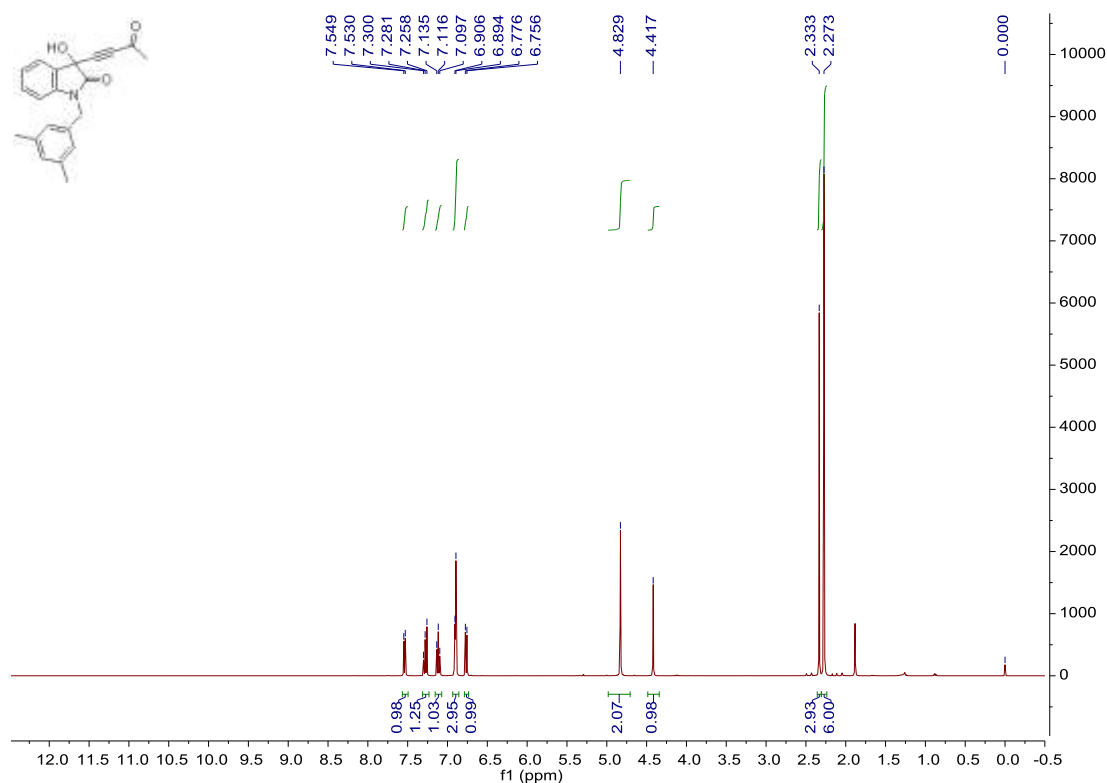

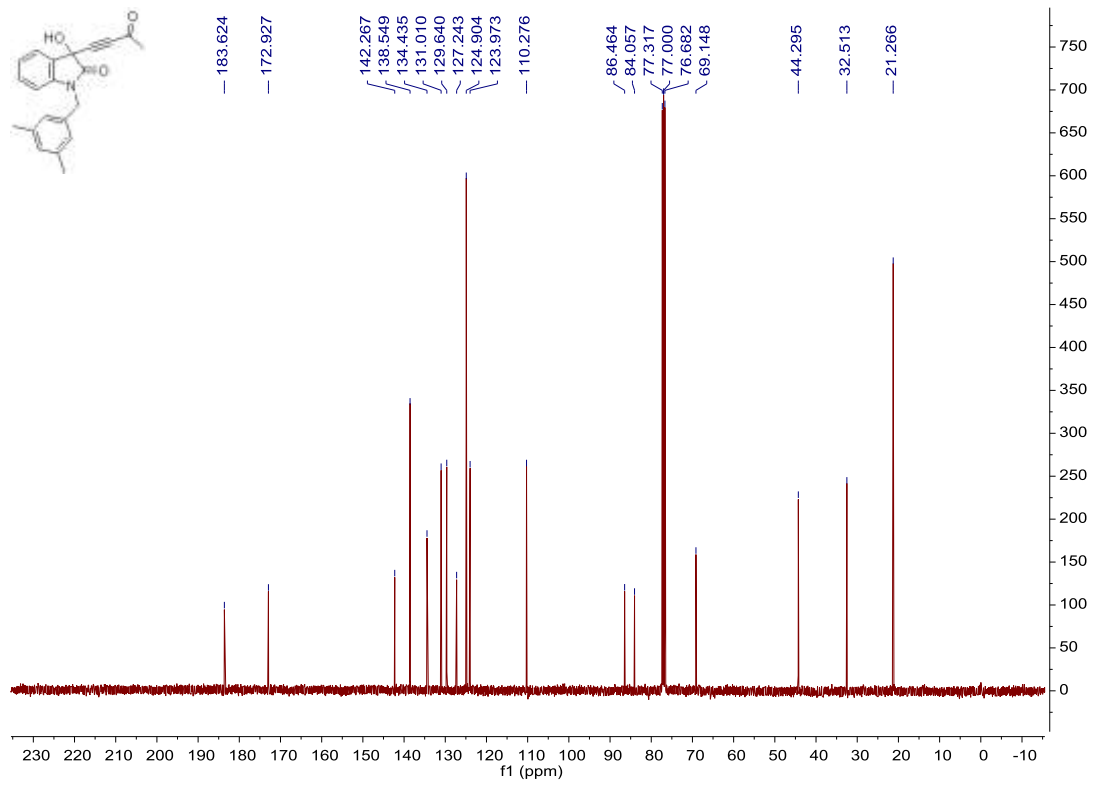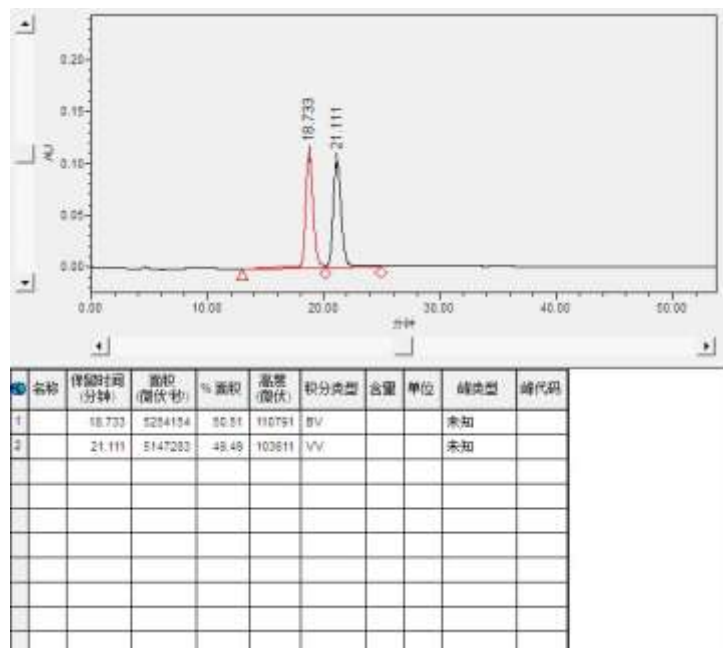

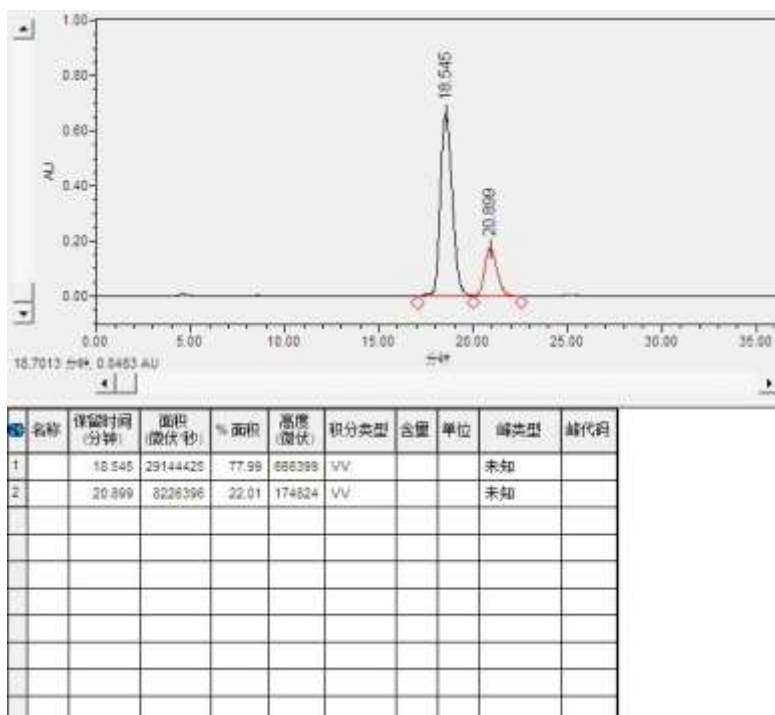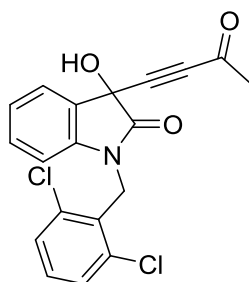

### 1-(2,6-dichlorobenzyl)-3-hydroxy-3-(3-oxobut-1-yn-1-yl)indolin-2-one (11)

A white solid, 63% yield (1174 mg). M.p.: 176-178 °C.  $^1\text{H}$  NMR ( $\text{CDCl}_3$ , TMS, 400 MHz)  $\delta$  2.34 (s, 3H,  $\text{CH}_3$ ), 3.94 (s, 1H, OH), 5.16 (d,  $J = 15.2$  Hz, 1H,  $\text{CH}_2$ ), 5.31 (d,  $J = 15.2$  Hz, 1H,  $\text{CH}_2$ ), 6.71 (d,  $J = 8.0$  Hz, 1H, ArH), 7.09 (dt,  $J = 0.8, 7.6$  Hz, 1H, ArH), 7.21-7.26 (m, 2H, ArH), 7.35 (s, 1H, ArH), 7.37 (s, 1H, ArH), 7.52 (dd,  $J = 1.2, 7.6$  Hz, 1H, ArH).  $^{13}\text{C}$  NMR ( $\text{CDCl}_3$ , TMS, 100 MHz)  $\delta$  32.6, 40.5, 68.9, 84.0, 86.5, 110.2, 123.8, 125.0, 127.1, 129.1, 129.3, 130.1, 131.0, 136.3, 141.8, 172.1, 183.6. IR (EtOH)  $\nu$  3345, 2948, 2912, 2849, 1712, 1679, 1610, 1469, 1436, 1214, 1200, 969, 797  $\text{cm}^{-1}$ . HRMS (ESI) Calcd. For  $\text{C}_{19}\text{H}_{17}\text{Cl}_2\text{N}_2\text{O}_3^+ (\text{M}+\text{NH}_4)^+$  requires 391.0611, Found: 391.0605.  $[\alpha]_D^{25} = -84.67$  (c 0.05,  $\text{CH}_2\text{Cl}_2$ ) for 28% *ee*; Enantiomeric excess was determined by HPLC with a Chiralcel OD-H column, Hexane/*i*PrOH = 95/5, 0.7 mL/min, 254 nm,  $t_{\text{minor}} = 86.463$  min,  $t_{\text{major}} = 58.402$  min.

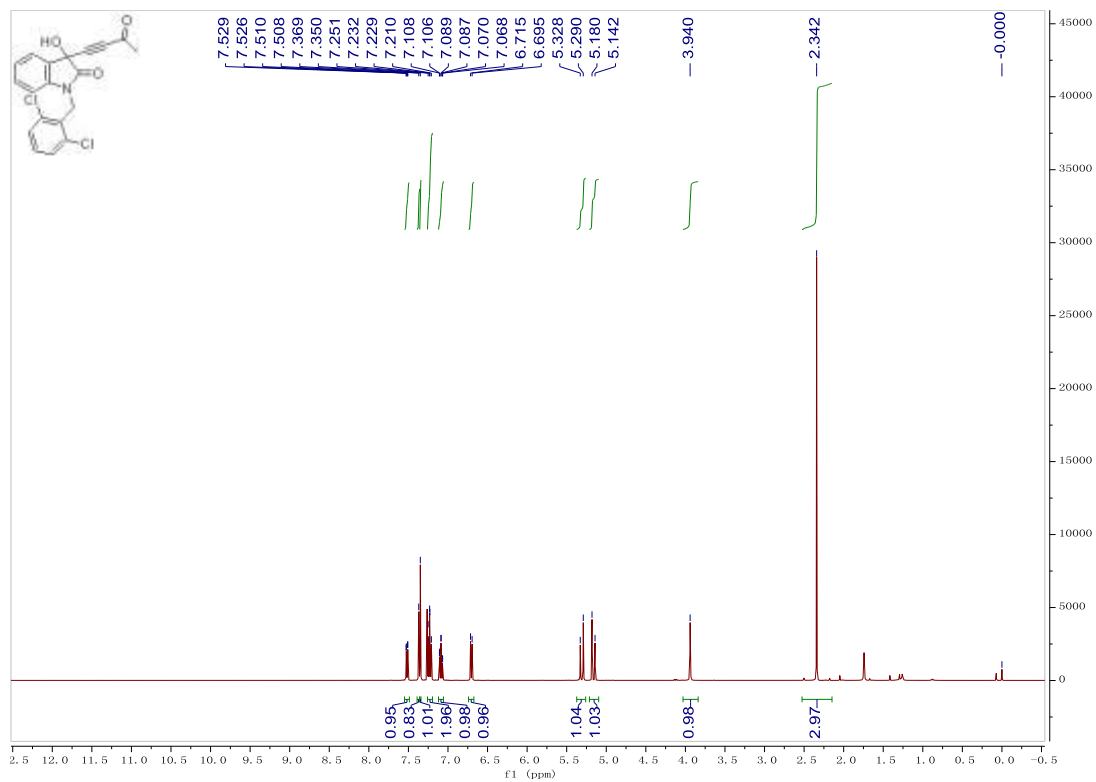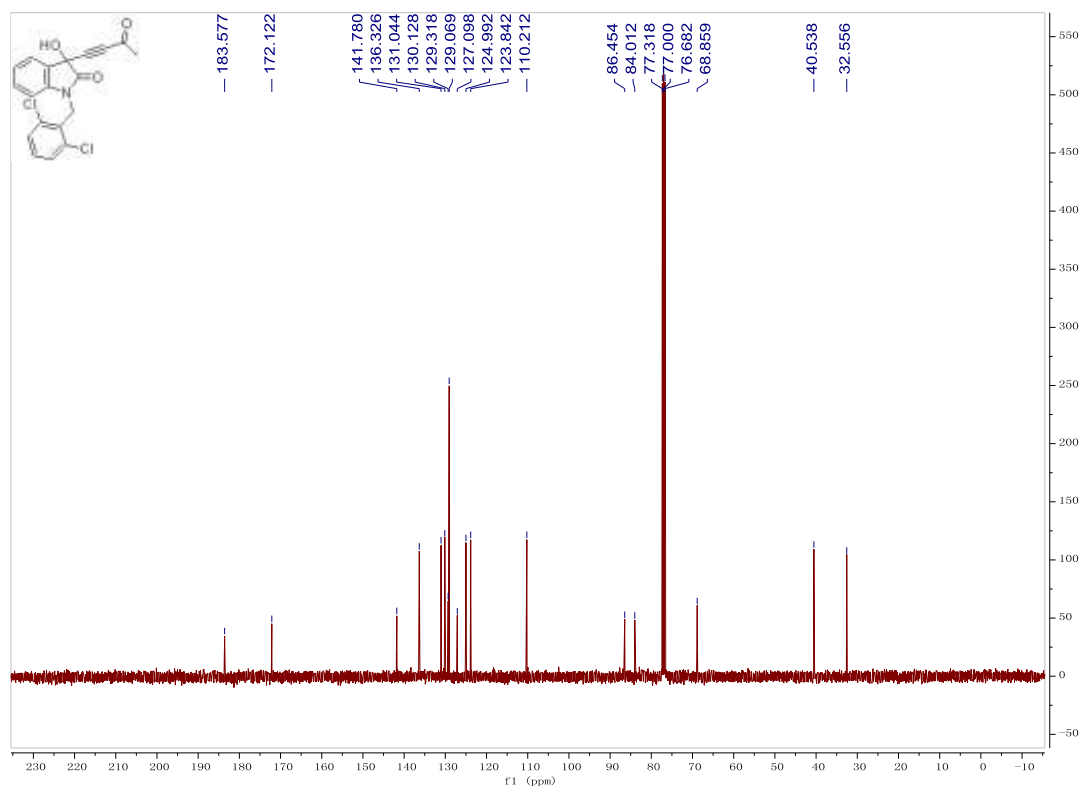

实验时间: 2019-07-16, 14:22:25  
谱图文件: D:\Sun Yaoliang\co2\17-93-b-rac.org

实验者:  
报告时间: 2019-07-16, 14:24:25  
积分方法: 面积归一法

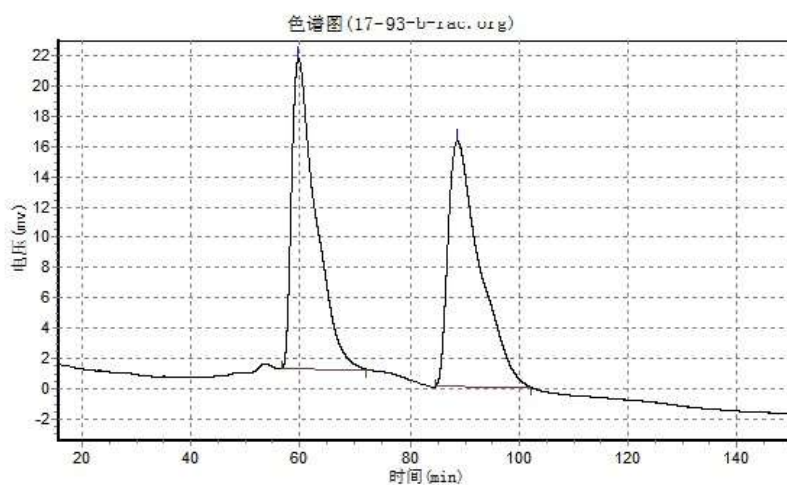

分析结果表

| 峰号 | 峰名 | 保留时间   | 峰高        | 峰面积          | 含量       |
|----|----|--------|-----------|--------------|----------|
| 1  |    | 59.740 | 20524.781 | 6234712.000  | 48.8260  |
| 2  |    | 88.657 | 16239.437 | 6534524.000  | 51.1740  |
| 总计 |    |        | 36764.218 | 12769236.000 | 100.0000 |

实验时间: 2019-07-16, 16:24:52  
谱图文件: D:\Sun Yaoliang\co2\17-93-b-asy.org

实验者:  
报告时间: 2019-07-16, 16:26:56  
积分方法: 面积归一法

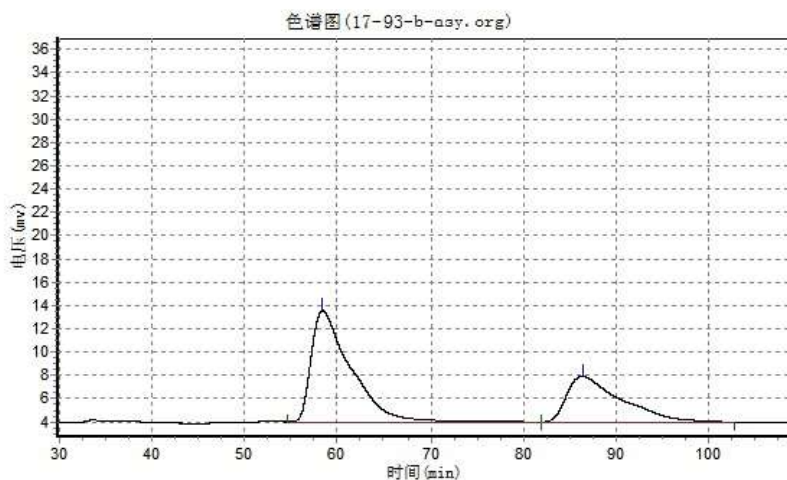

分析结果表

| 峰号 | 峰名 | 保留时间   | 峰高        | 峰面积         | 含量       |
|----|----|--------|-----------|-------------|----------|
| 1  |    | 58.402 | 9561.981  | 2852794.750 | 63.8956  |
| 2  |    | 86.463 | 3949.583  | 1611982.625 | 36.1044  |
| 总计 |    |        | 13511.564 | 4464777.375 | 100.0000 |



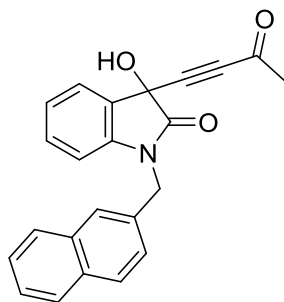

### 3-hydroxy-1-(naphthalen-2-ylmethyl)-3-(3-oxobut-1-yn-1-yl)indolin-2-one (1m)

A white solid, 79% yield (1402 mg). M.p.: 135-137 °C. <sup>1</sup>H NMR (CDCl<sub>3</sub>, TMS, 400 MHz) δ 2.33 (s, 3H, CH<sub>3</sub>), 4.37 (s, 1H, OH), 5.33 (d, *J* = 16.4 Hz, 1H, CH<sub>2</sub>), 5.47 (d, *J* = 16.4 Hz, 1H, CH<sub>2</sub>), 6.69 (d, *J* = 8.0 Hz, 1H, ArH), 7.11 (dt, *J* = 0.8, 7.6 Hz, 1H, ArH), 7.21 (dt, *J* = 1.2, 8.0 Hz, 1H, ArH), 7.28 (d, *J* = 7.2 Hz, 1H, ArH), 7.36-7.41 (m, 1H, ArH), 7.52-7.62 (m, 3H, ArH), 7.80 (d, *J* = 8.4 Hz, 1H, ArH), 7.90 (d, *J* = 7.6 Hz, 1H, ArH), 8.07 (d, *J* = 8.4 Hz, 1H, ArH). <sup>13</sup>C NMR (CDCl<sub>3</sub>, TMS, 100 MHz) δ 32.6, 42.4, 69.2, 84.2, 86.3, 110.5, 122.5, 124.1, 124.3, 125.0, 125.3, 126.1, 126.7, 127.2, 128.6, 129.0, 129.3, 130.8, 131.1, 133.8, 142.4, 173.1, 183.6. IR (EtOH) ν 3329, 3047, 2932, 2220, 1605, 1483, 1207, 1046, 806 cm<sup>-1</sup>. HRMS (ESI) Calcd. For C<sub>23</sub>H<sub>21</sub>N<sub>2</sub>O<sub>3</sub><sup>+</sup>(M+NH<sub>4</sub>)<sup>+</sup> requires 373.1547, Found: 373.1543.

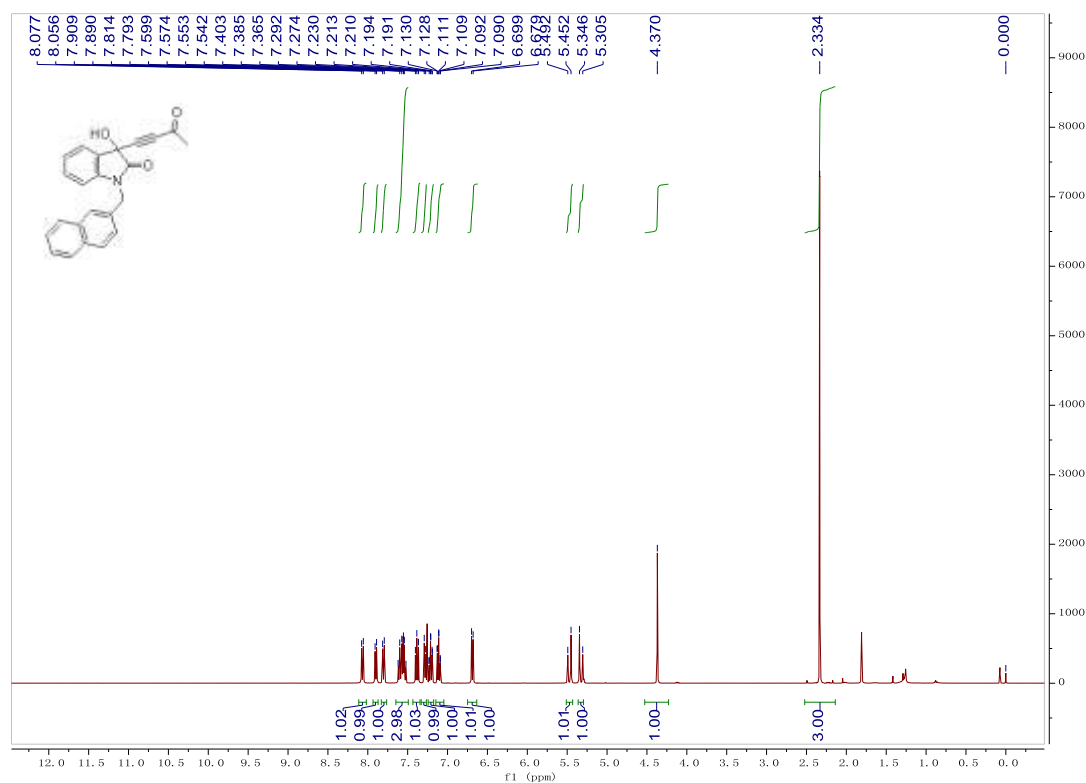

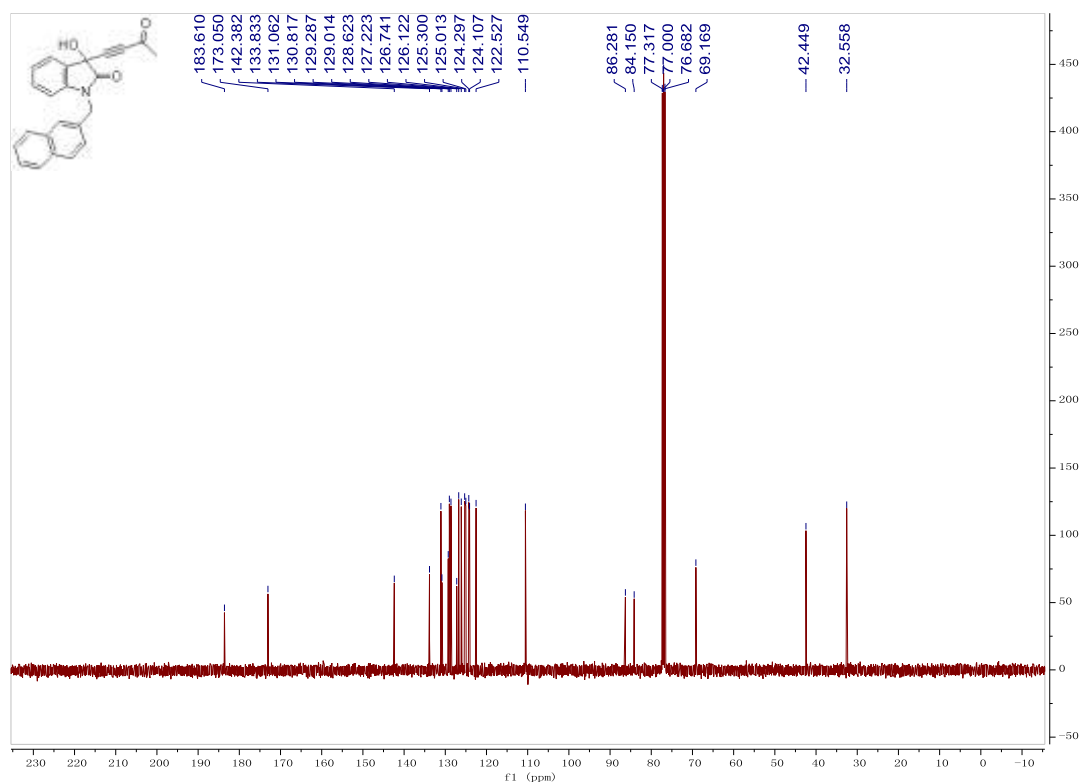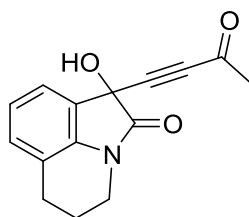

**1-hydroxy-1-(3-oxobut-1-yn-1-yl)-5,6-dihydro-4H-pyrrolo[3,2,1-ij]quinolin-2(1H)-one (1n)**

A white solid, 62% yield (791 mg). M.p.: 109-111 °C. <sup>1</sup>H NMR (CDCl<sub>3</sub>, TMS, 400 MHz) δ 2.01-2.08 (m, 2H, CH<sub>2</sub>), 2.34 (s, 3H, CH<sub>3</sub>), 2.78 (t, *J* = 6.0 Hz, 2H, CH<sub>2</sub>), 3.66-3.80 (m, 2H, CH<sub>2</sub>), 4.46 (br, 1H, OH), 7.03 (t, *J* = 7.6 Hz, 1H, ArH), 7.14 (dd, *J* = 0.8, 8.0 Hz, 1H, ArH), 7.35 (d, *J* = 7.2 Hz, 1H, ArH). <sup>13</sup>C NMR (CDCl<sub>3</sub>, TMS, 100 MHz) δ 20.8, 24.2, 32.5, 39.4, 70.2, 83.9, 86.7, 121.4, 122.5, 123.4, 125.9, 129.8, 138.8, 171.6, 183.8. IR (EtOH) ν 3240, 2961, 2919, 2883, 2215, 1694, 1674, 1633, 1476, 1223, 1109, 790 cm<sup>-1</sup>. HRMS (ESI) Calcd. For C<sub>15</sub>H<sub>17</sub>N<sub>2</sub>O<sub>3</sub><sup>+1</sup>(M+NH<sub>4</sub>)<sup>+</sup> requires 273.1234, Found: 273.1230. [α]<sub>D</sub><sup>25</sup> = +37.50 (c 0.04, CH<sub>2</sub>Cl<sub>2</sub>) for 96% *ee*; Enantiomeric excess was determined by HPLC with a Chiralcel AD-H column, Hexane/<sup>i</sup>PrOH = 90/10, 0.7 mL/min, 254 nm, *t*<sub>minor</sub> = 36.067 min, *t*<sub>major</sub> = 31.062 min.

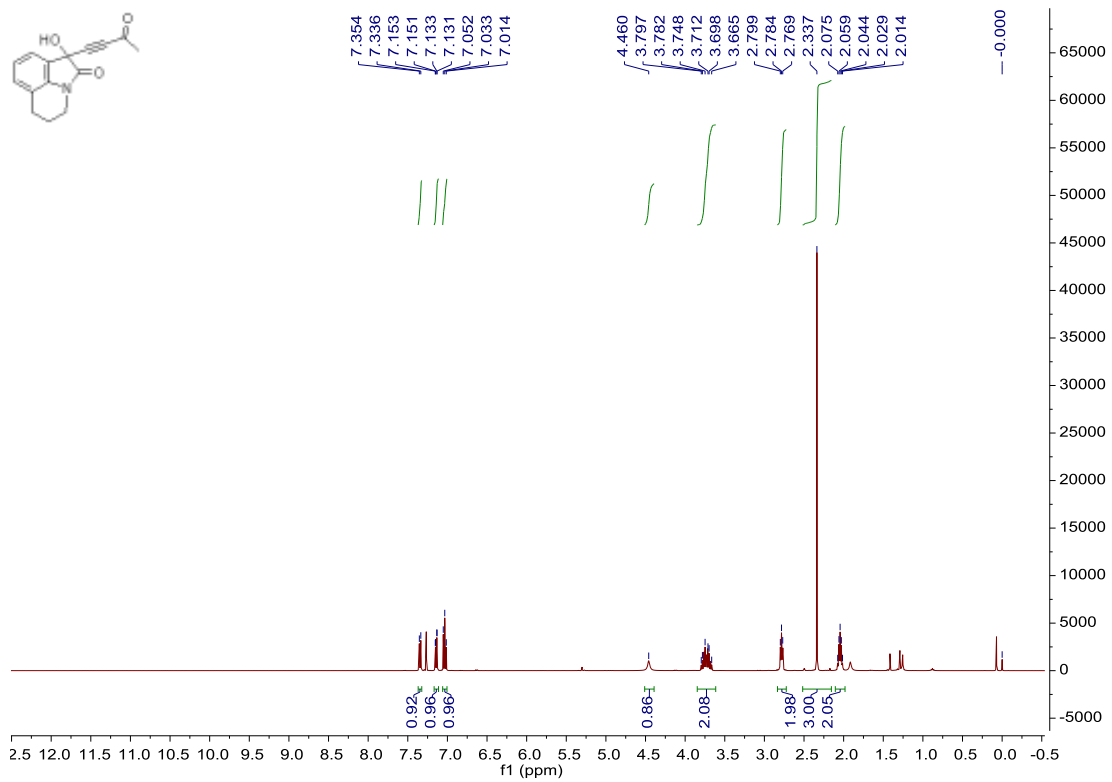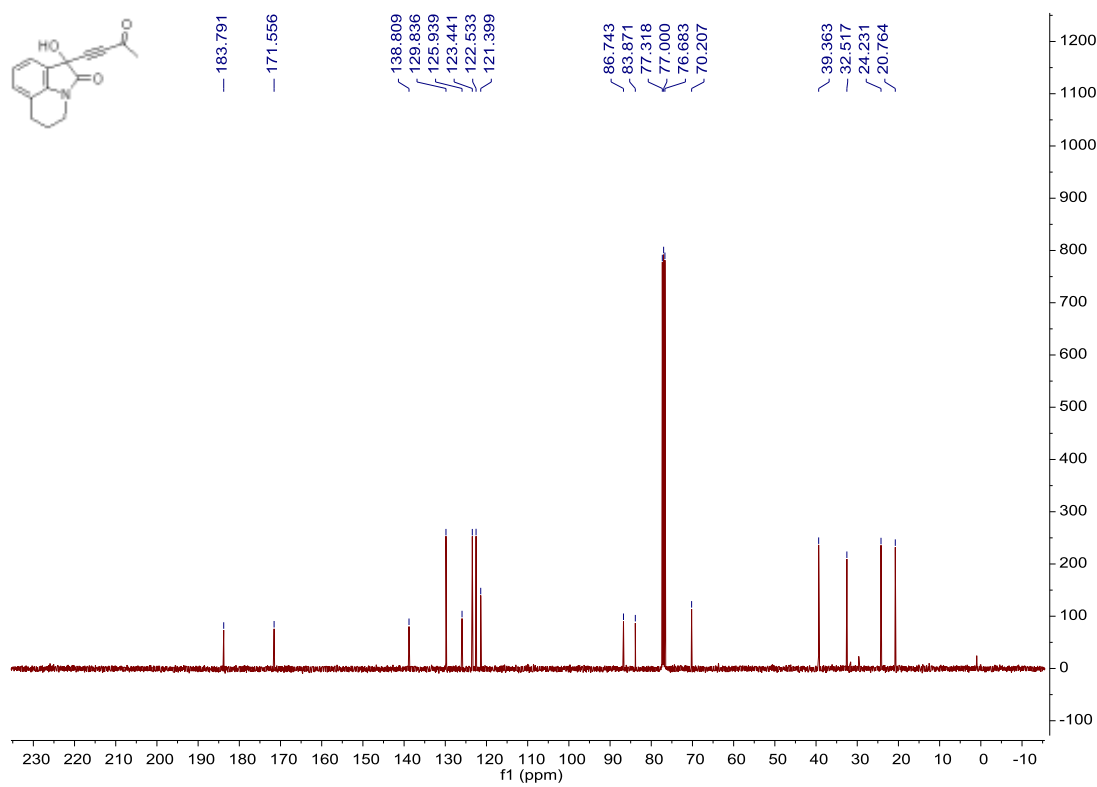

实验时间: 2018-04-28, 18:39:23  
谱图文件: D:\Sun Yaoliang\co2\18-12-b-rac.org

实验者:  
报告时间: 2018-04-28, 19:34:43  
积分方法: 面积归一法

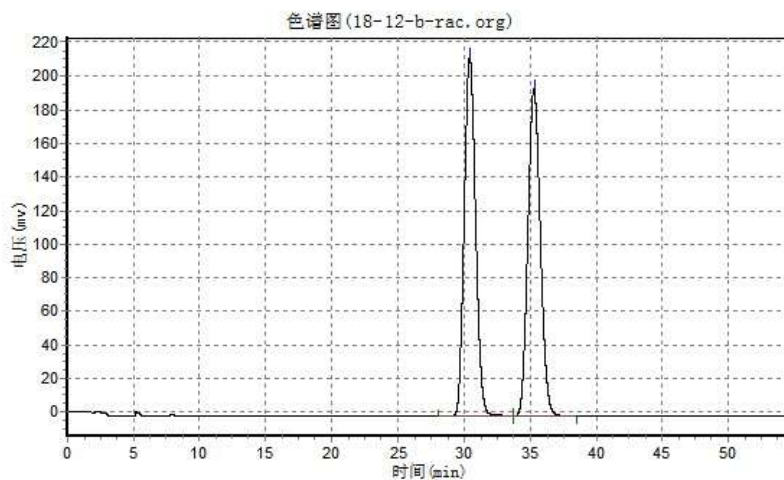

分析结果表

| 峰号 | 峰名 | 保留时间   | 峰高         | 峰面积          | 含量       |
|----|----|--------|------------|--------------|----------|
| 1  |    | 30.448 | 213757.984 | 12908537.000 | 50.0735  |
| 2  |    | 35.315 | 194578.781 | 12870654.000 | 49.9265  |
| 总计 |    |        | 408336.766 | 25779191.000 | 100.0000 |

实验时间: 2018-04-28, 19:51:42  
谱图文件: D:\Sun Yaoliang\co2\18-12-b-asy.org

实验者:  
报告时间: 2018-04-28, 19:53:54  
积分方法: 面积归一法

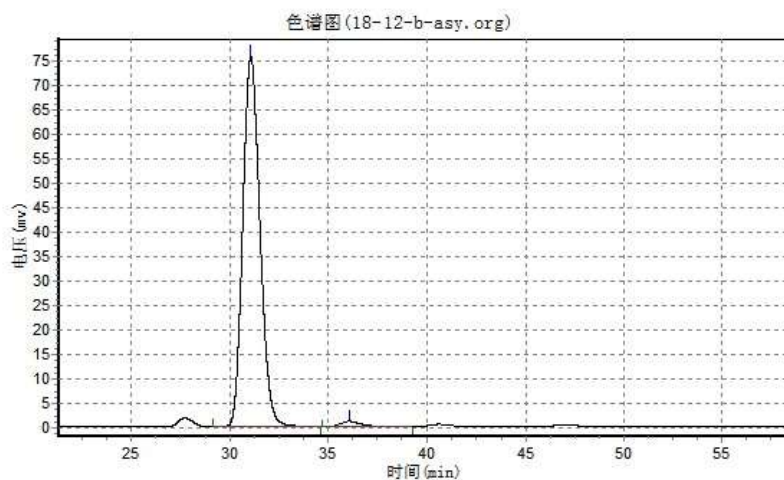

分析结果表

| 峰号 | 峰名 | 保留时间   | 峰高        | 峰面积         | 含量       |
|----|----|--------|-----------|-------------|----------|
| 1  |    | 31.062 | 75640.695 | 4609377.000 | 98.1485  |
| 2  |    | 36.067 | 1110.437  | 86954.500   | 1.8515   |
| 总计 |    |        | 76751.132 | 4696331.500 | 100.0000 |

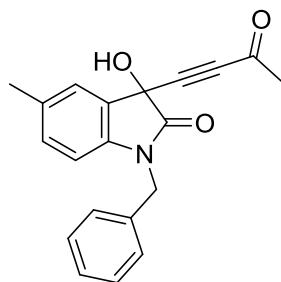

**1-benzyl-3-hydroxy-5-methyl-3-(3-oxobut-1-yn-1-yl)indolin-2-one (1o)**

A white solid, 82% yield (1308 mg). M.p.: 184-186 °C.  $^1\text{H}$  NMR ( $\text{CDCl}_3$ , TMS, 400 MHz)  $\delta$  2.31-2.36 (m, 6H,  $\text{CH}_3$ ), 4.43 (br, 1H, OH), 4.87 (d,  $J = 15.6$  Hz, 1H,  $\text{CH}_2$ ), 4.92 (d,  $J = 15.6$  Hz, 1H,  $\text{CH}_2$ ), 6.62 (d,  $J = 8.0$  Hz, 1H, ArH), 7.06 (d,  $J = 8.0$  Hz, 1H, ArH), 7.26-7.37 (m, 6H, ArH).  $^{13}\text{C}$  NMR ( $\text{CDCl}_3$ , TMS, 100 MHz)  $\delta$  21.0, 32.6, 44.3, 69.2, 84.1, 86.5, 110.0, 125.7, 127.1, 127.2, 127.9, 128.9, 131.3, 133.9, 134.6, 139.6, 172.9, 183.7. IR (EtOH)  $\nu$  3272, 2912, 2220, 1701, 1674, 1497, 1348, 1250, 1229, 1107, 818  $\text{cm}^{-1}$ . HRMS (ESI) Calcd. For  $\text{C}_{20}\text{H}_{21}\text{N}_2\text{O}_3^+$  ( $\text{M}+\text{NH}_4$ ) $^+$  requires 337.1547, Found: 337.1540.  $[\alpha]_D^{25} = -94.17$  (c 0.04,  $\text{CH}_2\text{Cl}_2$ ) for 90% *ee*; Enantiomeric excess was determined by HPLC with a Chiralcel AD-H column, Hexane/*i*PrOH = 90/10, 0.7 mL/min, 254 nm,  $t_{\text{minor}} = 37.298$  min,  $t_{\text{major}} = 24.329$  min.

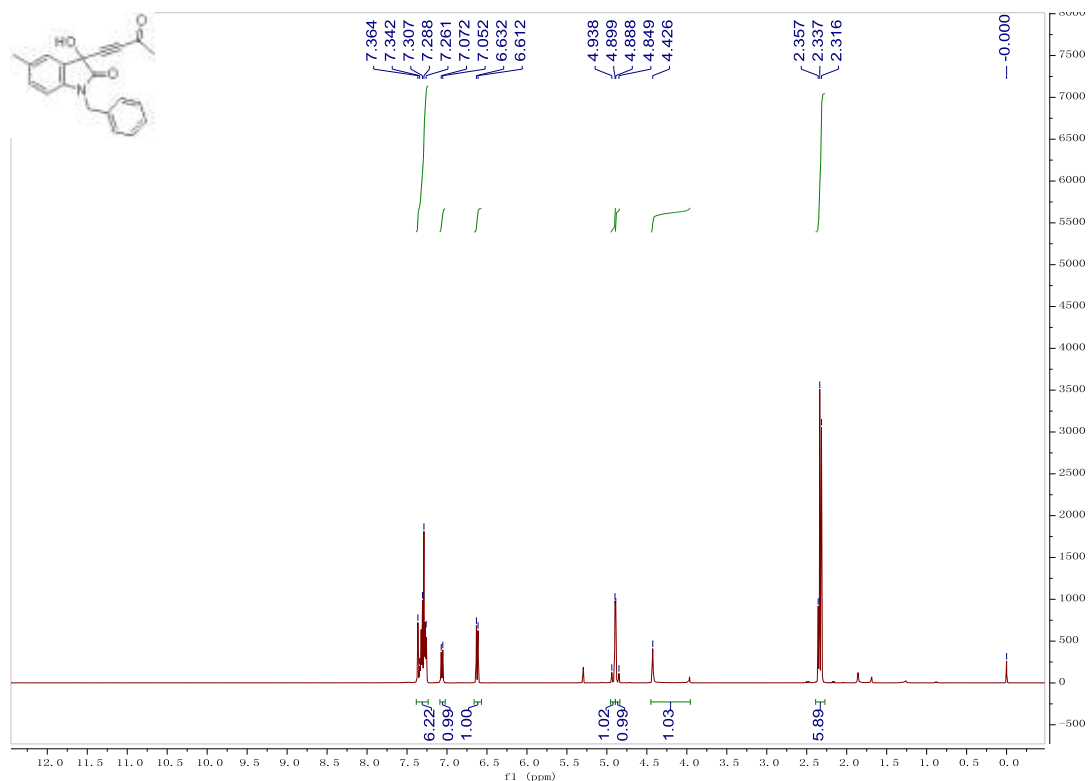

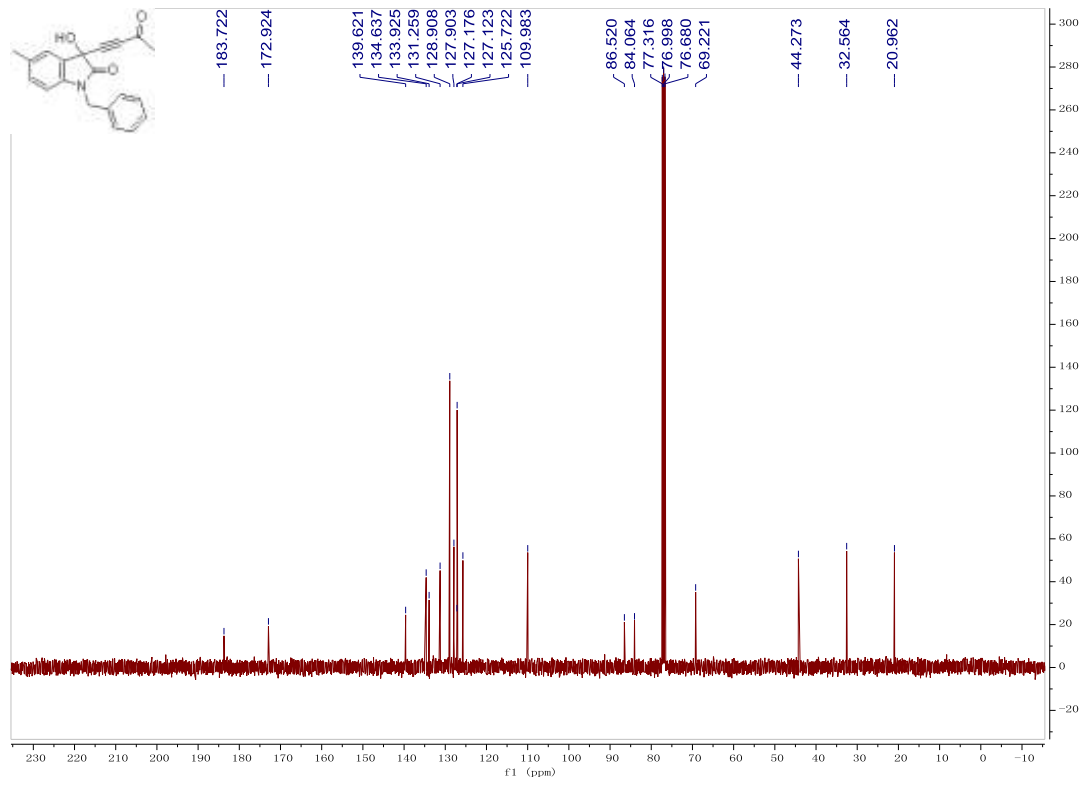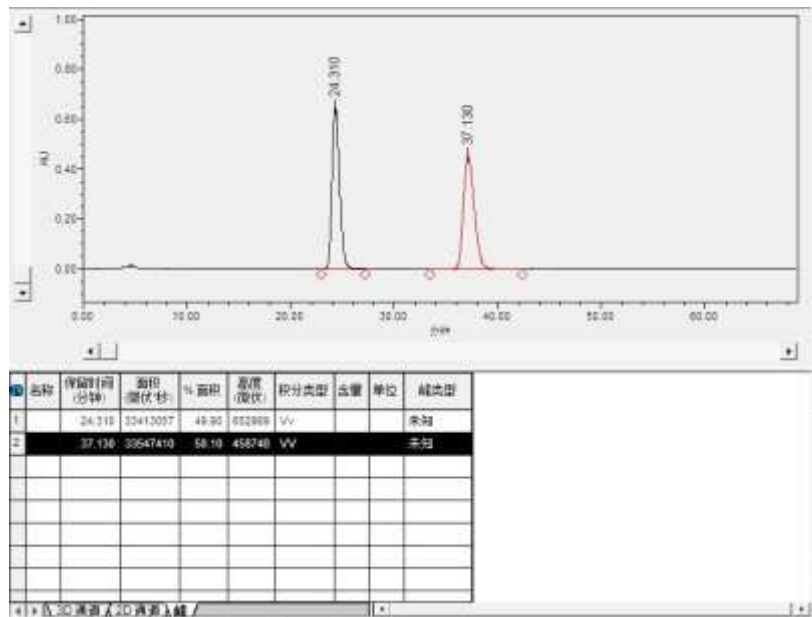

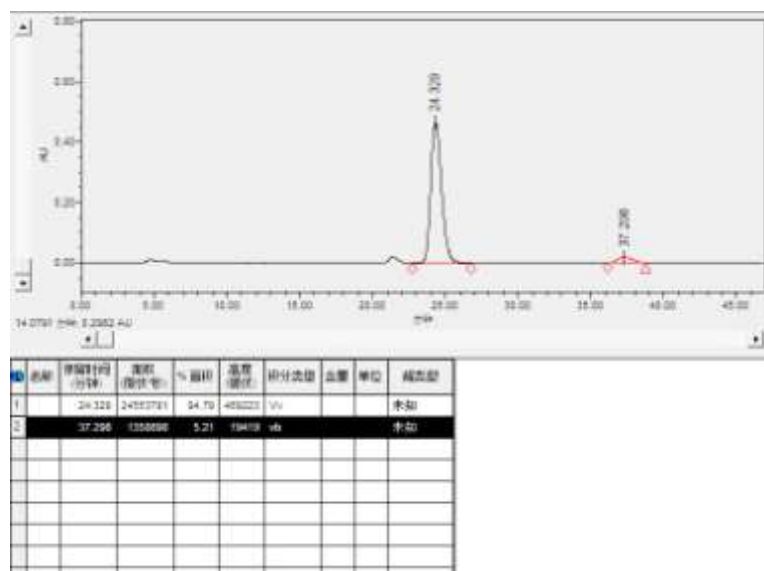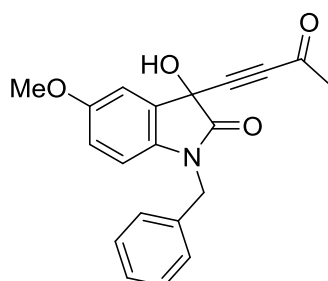

### 1-benzyl-3-hydroxy-5-methoxy-3-(3-oxobut-1-yn-1-yl)indolin-2-one (1p)

A white solid, 71% yield (1189 mg). M.p.: 159-161 °C.  $^1\text{H}$  NMR ( $\text{CDCl}_3$ , TMS, 400 MHz)  $\delta$  2.35 (s, 3H,  $\text{CH}_3$ ), 3.78 (s, 3H,  $\text{CH}_3$ ), 4.43 (br, 1H, OH), 4.87 (d,  $J = 16.0$  Hz, 1H,  $\text{CH}_2$ ), 4.91 (d,  $J = 16.0$  Hz, 1H,  $\text{CH}_2$ ), 6.63 (d,  $J = 8.8$  Hz, 1H, ArH), 6.79 (dd,  $J = 2.4, 8.4$  Hz, 1H, ArH), 7.15 (d,  $J = 2.4$  Hz, 1H, ArH), 7.27-7.35 (m, 5H, ArH).  $^{13}\text{C}$  NMR ( $\text{CDCl}_3$ , TMS, 100 MHz)  $\delta$  32.6, 44.4, 55.8, 69.4, 84.2, 86.3, 110.9, 111.5, 116.1, 127.1, 127.9, 128.2, 128.9, 134.6, 135.2, 156.9, 172.7, 183.6. IR (EtOH)  $\nu$  3246, 2959, 2943, 2831, 2210, 1604, 1248, 1156, 772  $\text{cm}^{-1}$ . HRMS (ESI) Calcd. For  $\text{C}_{20}\text{H}_{21}\text{N}_2\text{O}_4^+$  ( $\text{M}+\text{NH}_4$ ) $^+$  requires 353.1496, Found: 353.1489.  $[\alpha]_{\text{D}}^{25} = -84.67$  (c 0.05,  $\text{CH}_2\text{Cl}_2$ ) for 86% *ee*; Enantiomeric excess was determined by HPLC with a Chiralcel AD-H column, Hexane/ $i$ PrOH = 90/10, 0.7 mL/min, 254 nm,  $t_{\text{minor}} = 79.002$  min,  $t_{\text{major}} = 49.773$  min.

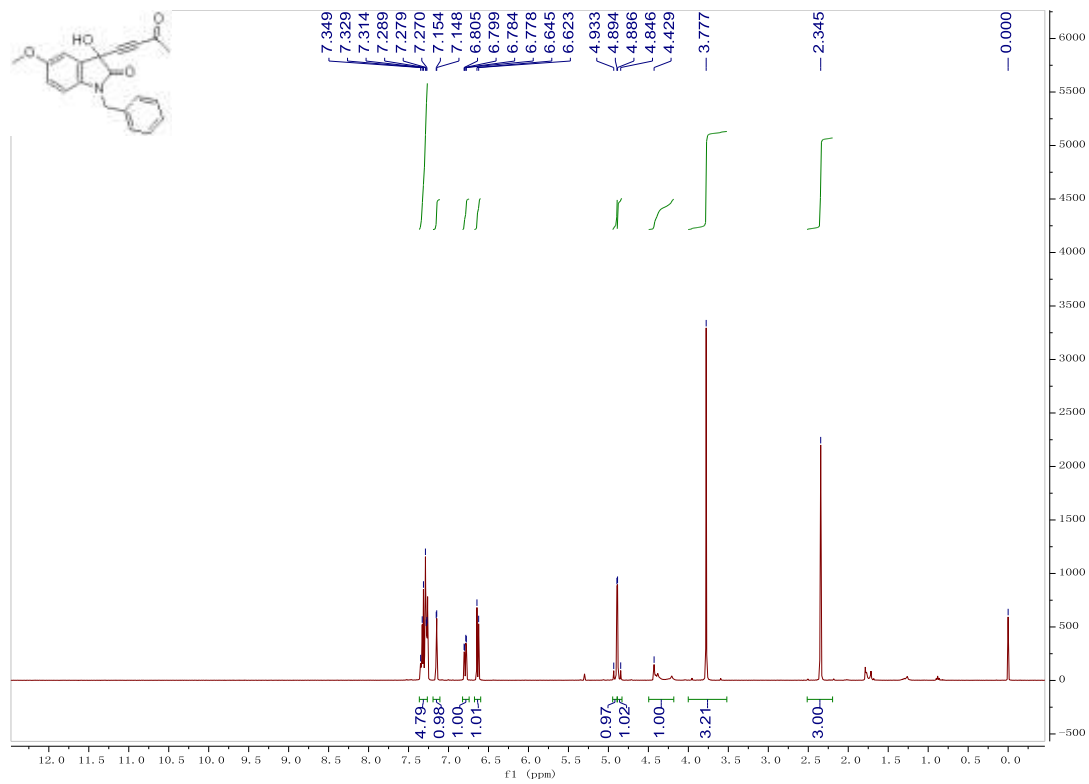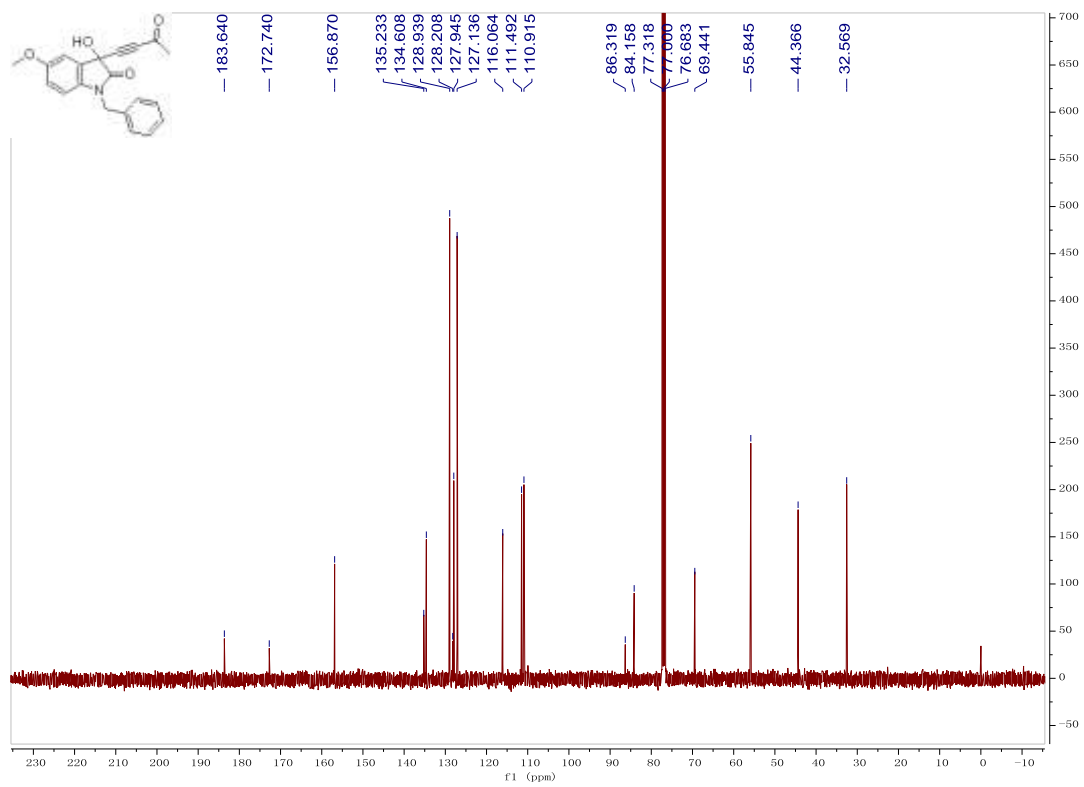



实验时间: 2019-07-05, 12:16:39  
谱图文件: D:\Sun Yaoliang\co2\17-89-b-rac.org

实验者:  
报告时间: 2019-07-10, 11:52:37  
积分方法: 面积归一法

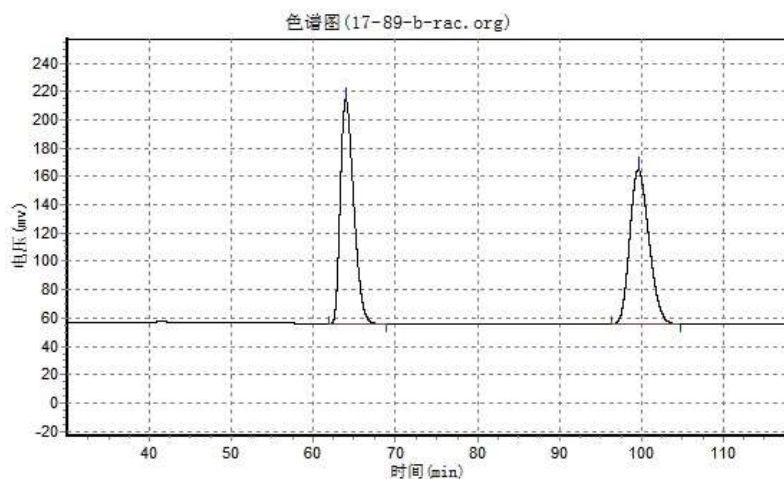

分析结果表

| 峰号 | 峰名 | 保留时间   | 峰高         | 峰面积          | 含量       |
|----|----|--------|------------|--------------|----------|
| 1  |    | 64.072 | 158483.859 | 17963004.000 | 50.2866  |
| 2  |    | 99.637 | 109152.617 | 17758260.000 | 49.7134  |
| 总计 |    |        | 267636.477 | 35721264.000 | 100.0000 |

实验时间: 2019-07-10, 19:36:39  
谱图文件: D:\Sun Yaoliang\co2\17-89-b-asy-re.org

实验者:  
报告时间: 2019-07-10, 19:37:31  
积分方法: 面积归一法

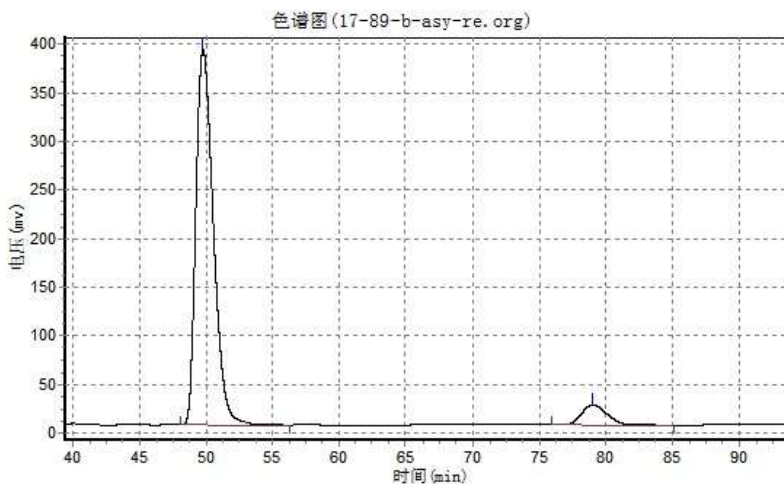

分析结果表

| 峰号 | 峰名 | 保留时间   | 峰高         | 峰面积          | 含量       |
|----|----|--------|------------|--------------|----------|
| 1  |    | 49.773 | 386891.656 | 35195412.000 | 92.8817  |
| 2  |    | 79.002 | 20472.156  | 2697318.250  | 7.1183   |
| 总计 |    |        | 407363.813 | 37892730.250 | 100.0000 |

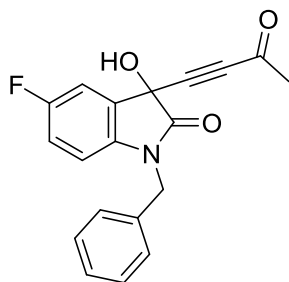

### 1-benzyl-5-fluoro-3-hydroxy-3-(3-oxobut-1-yn-1-yl)indolin-2-one (1q)

A white solid, 89% yield (1437 mg). M.p.: 169-171 °C.  $^1\text{H}$  NMR ( $\text{CDCl}_3$ , TMS, 400 MHz)  $\delta$  2.35 (s, 3H,  $\text{CH}_3$ ), 4.68 (br, 1H, OH), 4.88 (d,  $J = 16.0$  Hz, 1H,  $\text{CH}_2$ ), 4.93 (d,  $J = 16.0$  Hz, 1H,  $\text{CH}_2$ ), 6.67 (dd,  $J = 4.0, 8.8$  Hz, 1H, ArH), 6.98 (dt,  $J = 2.4, 8.8$  Hz, 1H, ArH), 7.26-7.37 (m, 6H, ArH).  $^{13}\text{C}$  NMR ( $\text{CDCl}_3$ , TMS, 100 MHz)  $\delta$  32.5, 44.5, 69.1, 84.3, 85.5, 111.1 (d,  $J = 7.9$  Hz), 113.2 (d,  $J = 25.2$  Hz), 117.4 (d,  $J = 23.4$  Hz), 127.1, 128.1, 129.0, 134.2, 137.9, 159.7 (d,  $J = 242.6$  Hz), 172.9, 183.5.  $^{19}\text{F}$  NMR (376 MHz,  $\text{CDCl}_3$ ,  $\text{CFCl}_3$ )  $\delta$  -117.84(-117.78). IR (EtOH)  $\nu$  3293, 2212, 1677, 1494, 1462, 1178, 1144, 796, 698  $\text{cm}^{-1}$ . HRMS (ESI) Calcd. For  $\text{C}_{19}\text{H}_{18}\text{FN}_2\text{O}_3^+ (\text{M}+\text{NH}_4)^+$  requires 341.1296, Found: 341.1291.  $[\alpha]_{\text{D}}^{25} = +28.33$  (c 0.04,  $\text{CH}_2\text{Cl}_2$ ) for 23% *ee*; Enantiomeric excess was determined by HPLC with a Chiralcel AD-H column, Hexane/*i*PrOH = 80/20, 0.7 mL/min, 254 nm,  $t_{\text{minor}} = 20.733$  min,  $t_{\text{major}} = 15.098$  min.

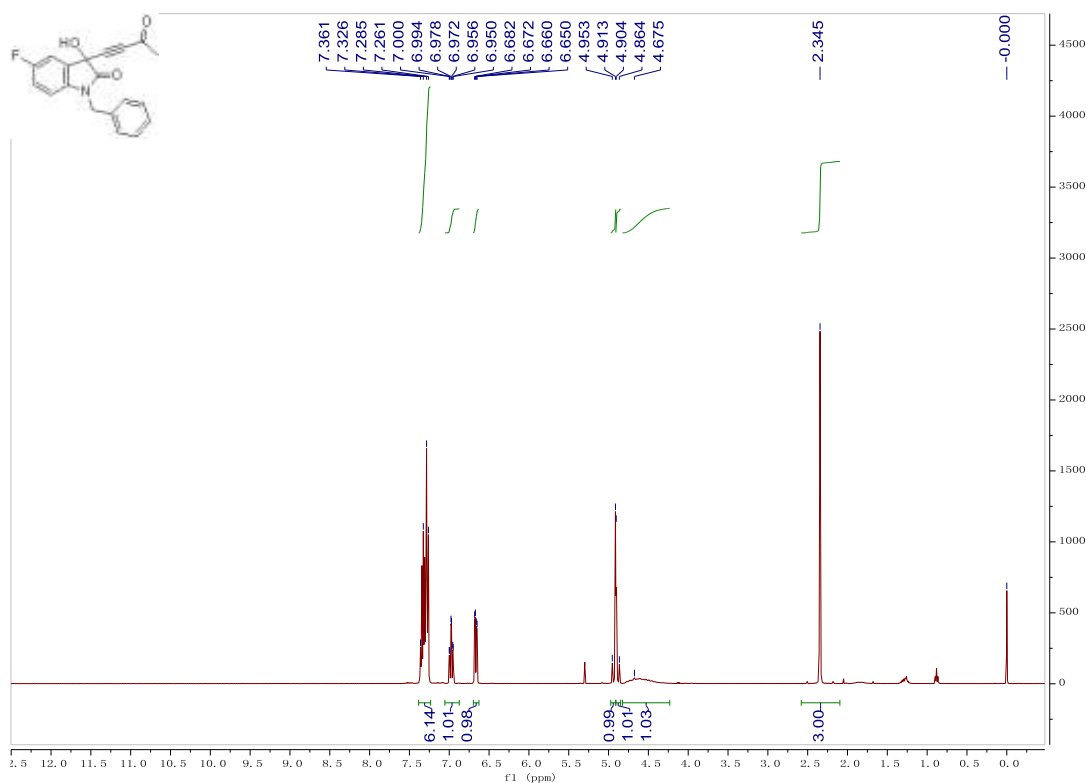

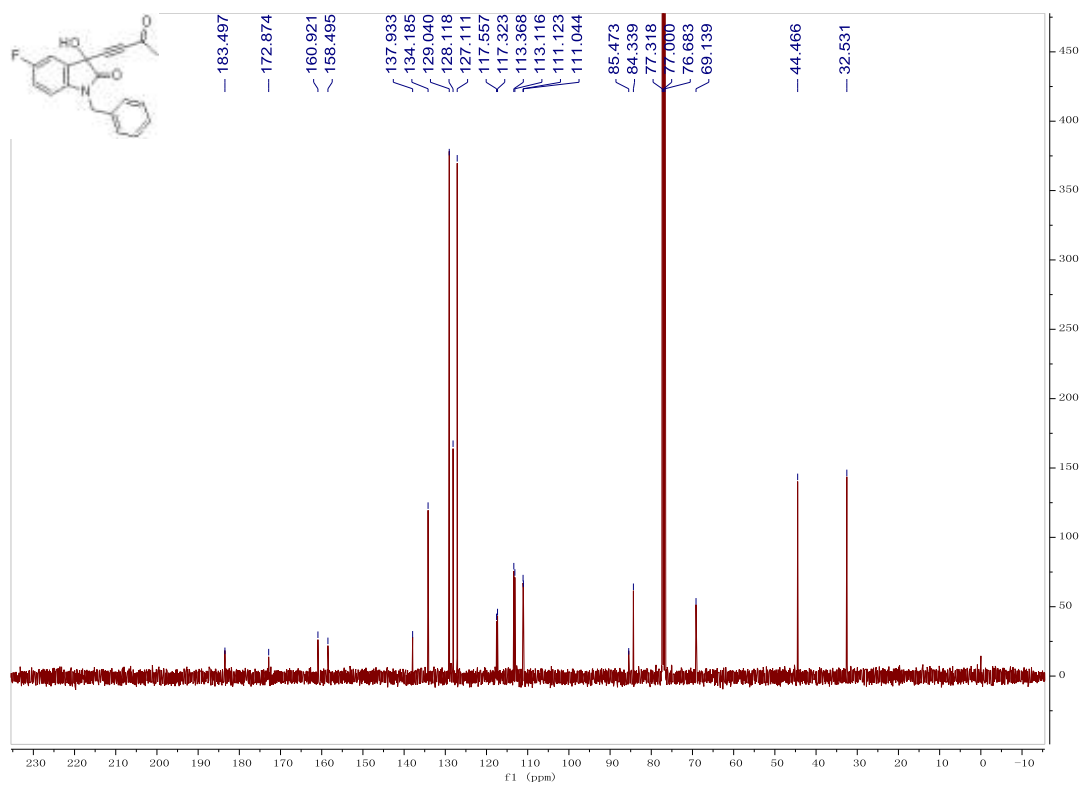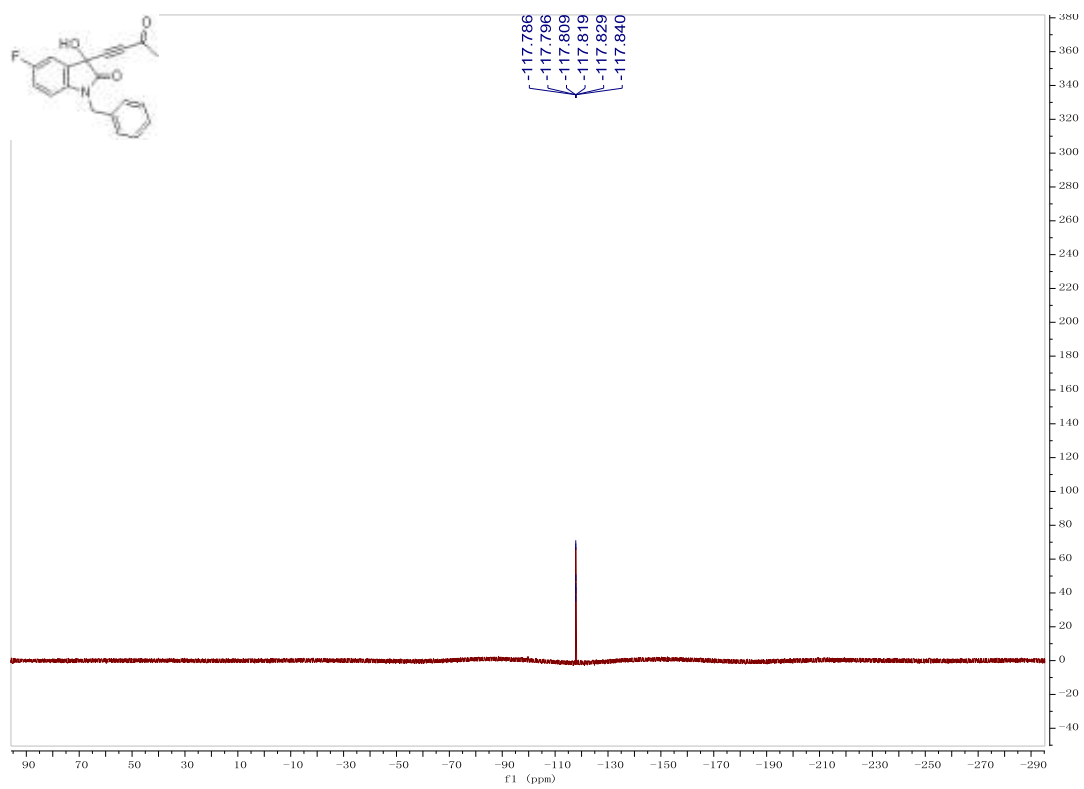

实验时间: 2019-07-12, 16:15:14  
谱图文件: D:\Sun Yaoliang\co2\17-90-b-rac.org

实验者:  
报告时间: 2019-07-12, 16:20:39  
积分方法: 面积归一法

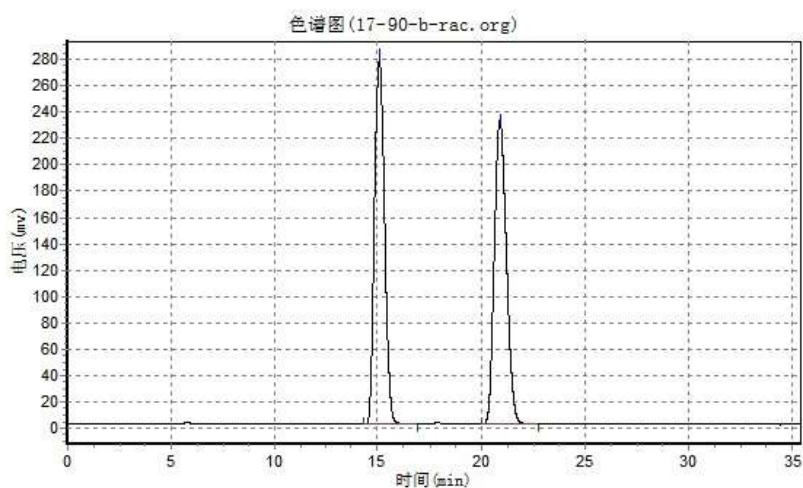

分析结果表

| 峰号 | 峰名 | 保留时间   | 峰高         | 峰面积          | 含量       |
|----|----|--------|------------|--------------|----------|
| 1  |    | 15.098 | 274719.969 | 9412814.000  | 50.1724  |
| 2  |    | 20.932 | 228281.344 | 9348120.000  | 49.8276  |
| 总计 |    |        | 503001.313 | 18760934.000 | 100.0000 |

实验时间: 2019-07-12, 16:46:47  
谱图文件: D:\Sun Yaoliang\co2\17-90-b-asy.org

实验者:  
报告时间: 2019-07-12, 16:47:34  
积分方法: 面积归一法

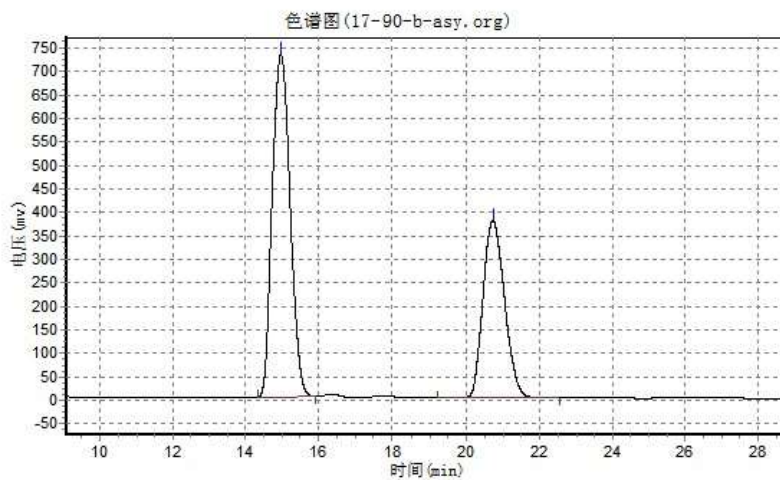

分析结果表

| 峰号 | 峰名 | 保留时间   | 峰高          | 峰面积          | 含量       |
|----|----|--------|-------------|--------------|----------|
| 1  |    | 14.963 | 730436.438  | 24831544.000 | 61.5726  |
| 2  |    | 20.733 | 377927.219  | 15497329.000 | 38.4274  |
| 总计 |    |        | 1108363.656 | 40328873.000 | 100.0000 |

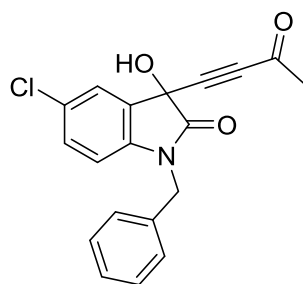

**1-benzyl-5-chloro-3-hydroxy-3-(3-oxobut-1-yn-1-yl)indolin-2-one (1r)**

A white solid, 87% yield (1474 mg). M.p.: 182-184 °C. <sup>1</sup>H NMR (CDCl<sub>3</sub>, TMS, 400 MHz) δ 2.37 (s, 3H, CH<sub>3</sub>), 4.24 (br, 1H, OH), 4.87 (d, *J* = 16.0 Hz, 1H, CH<sub>2</sub>), 4.93 (d, *J* = 16.0 Hz, 1H, CH<sub>2</sub>), 6.66 (d, *J* = 8.4 Hz, 1H, ArH), 7.23-7.37 (m, 6H, ArH), 7.52 (d, *J* = 1.6 Hz, 1H, ArH). <sup>13</sup>C NMR (CDCl<sub>3</sub>, TMS, 100 MHz) δ 32.6, 44.4, 68.9, 84.4, 85.2, 111.3, 125.6, 127.1, 128.2, 128.5, 128.6, 129.1, 129.5, 131.0, 134.1, 140.6, 172.4, 183.4. IR (EtOH) ν 3295, 3021, 2812, 2210, 1708, 1677, 1488, 1209, 1170, 1074, 814, 736 cm<sup>-1</sup>. HRMS (ESI) Calcd. For C<sub>19</sub>H<sub>18</sub>ClN<sub>2</sub>O<sub>3</sub><sup>+1</sup>(M+NH<sub>4</sub>)<sup>+</sup> requires 357.1000, Found: 357.0997.

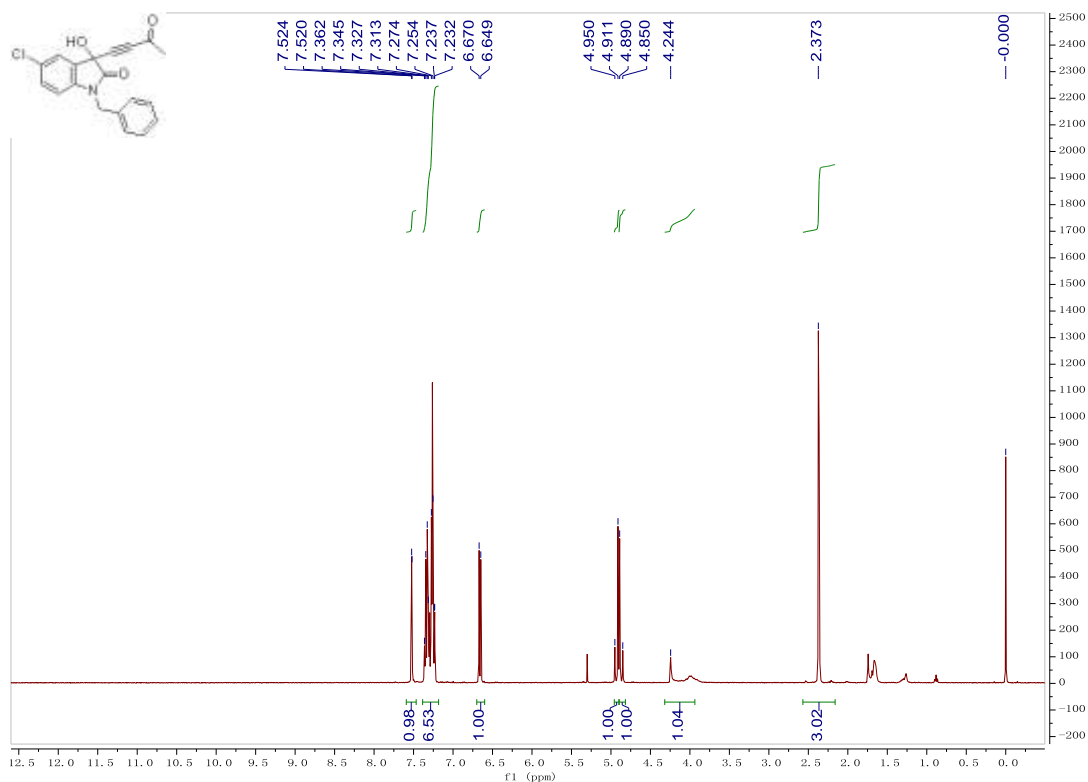

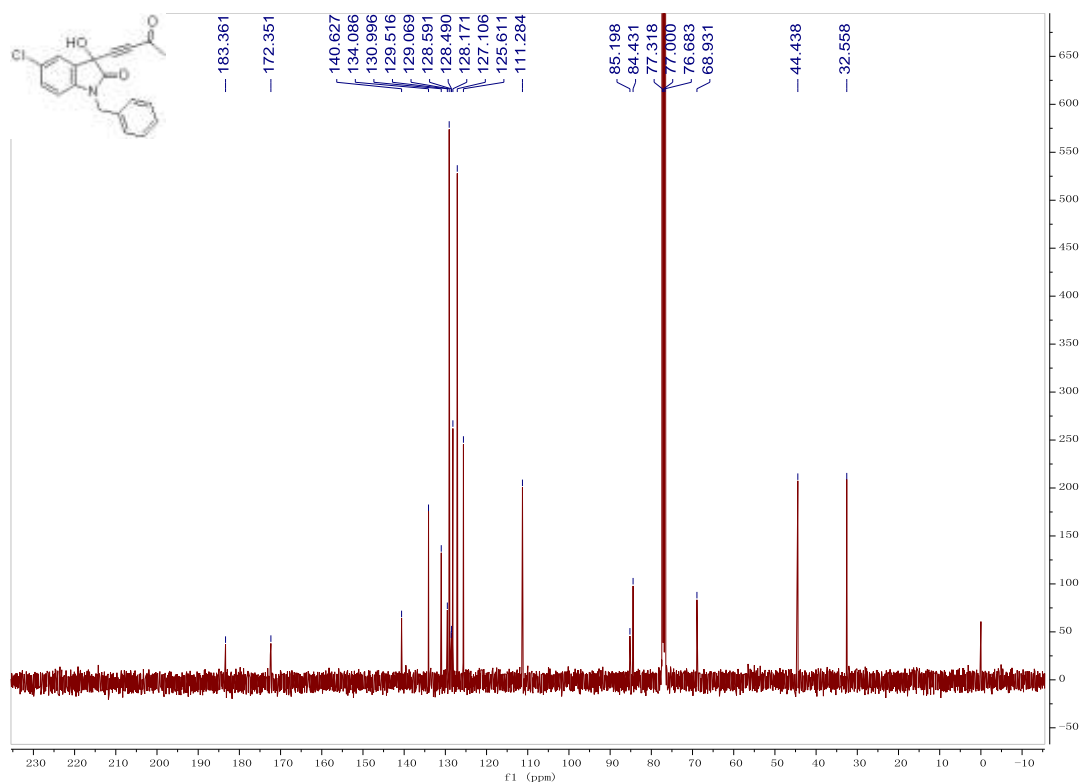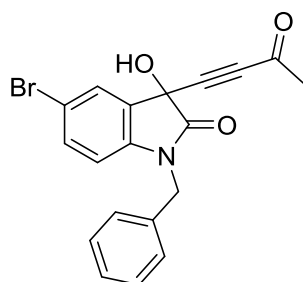

### 1-benzyl-5-bromo-3-hydroxy-3-(3-oxobut-1-yn-1-yl)indolin-2-one (**1s**)

A white solid, 71% yield (1360 mg). M.p.: 170-172 °C.  $^1\text{H}$  NMR ( $\text{CDCl}_3$ , TMS, 400 MHz)  $\delta$  2.36 (s, 3H,  $\text{CH}_3$ ), 4.35 (br, 1H, OH), 4.87 (d,  $J = 15.6$  Hz, 1H,  $\text{CH}_2$ ), 4.93 (d,  $J = 15.6$  Hz, 1H,  $\text{CH}_2$ ), 6.61 (d,  $J = 8.4$  Hz, 1H, ArH), 7.25-7.35 (m, 5H, ArH), 7.39 (dd,  $J = 2.0, 8.4$  Hz, 1H, ArH), 7.66 (d,  $J = 2.4$  Hz, 1H, ArH).  $^{13}\text{C}$  NMR ( $\text{CDCl}_3$ , TMS, 100 MHz)  $\delta$  32.5, 44.4, 68.9, 84.4, 85.3, 111.7, 116.7, 127.1, 128.2, 128.3, 128.9, 129.1, 133.9, 134.0, 141.1, 172.4, 183.4. IR (EtOH)  $\nu$  3290, 2215, 1707, 1677, 1487, 1368, 1344, 1208, 1168, 1071, 812  $\text{cm}^{-1}$ . HRMS (ESI) Calcd. For  $\text{C}_{19}\text{H}_{18}\text{BrN}_2\text{O}_3^+$  ( $\text{M}+\text{NH}_4$ ) $^+$  requires 401.0495, Found: 401.0491.  $[\alpha]_D^{25} = +88.89$  (c 0.018,  $\text{CH}_2\text{Cl}_2$ ) for 47% *ee*; Enantiomeric excess was determined by HPLC with a Chiralcel AD-H column, Hexane/*i*PrOH = 90/10, 0.7 mL/min, 254 nm,  $t_{\text{minor}} = 37.569$  min,  $t_{\text{major}} = 24.459$  min.

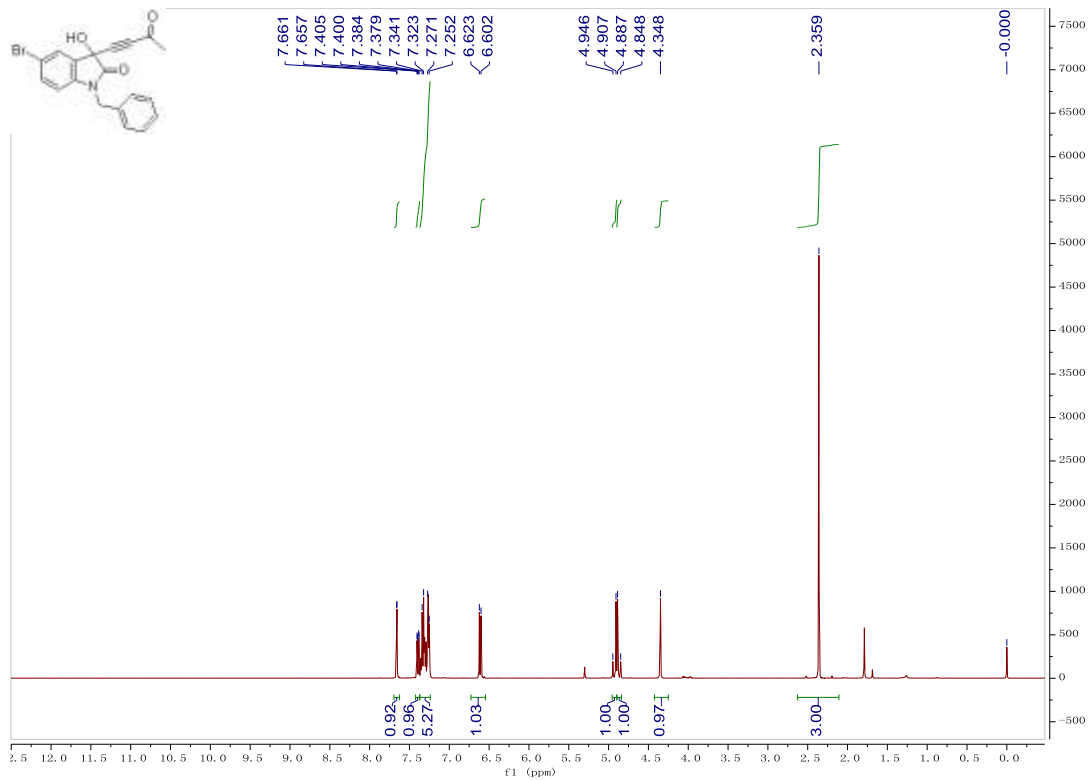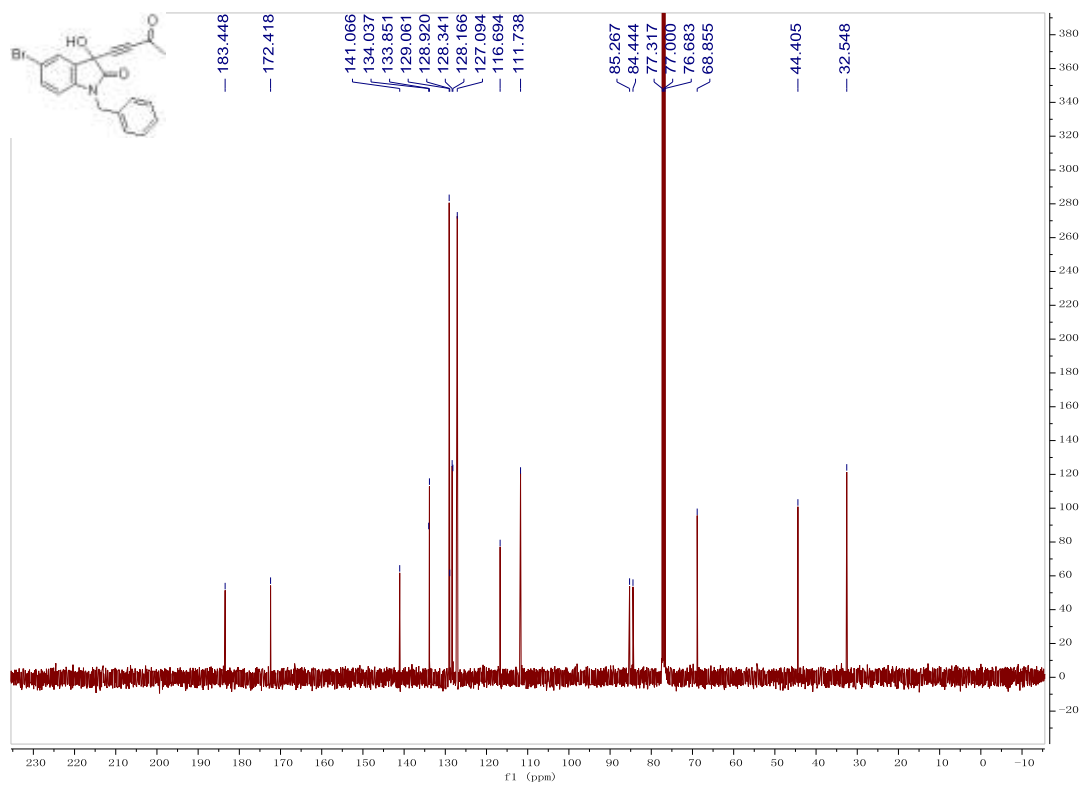

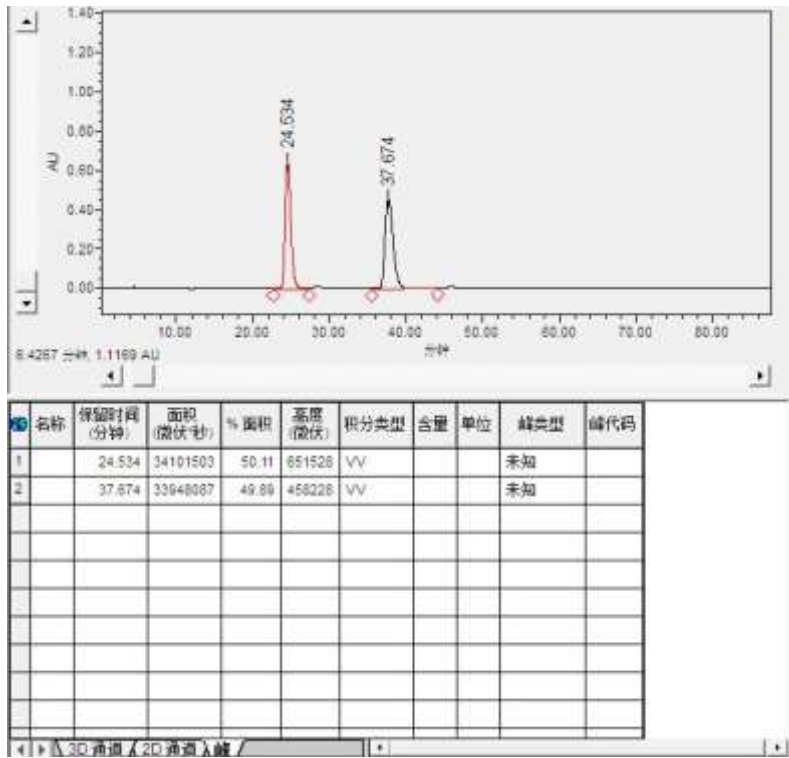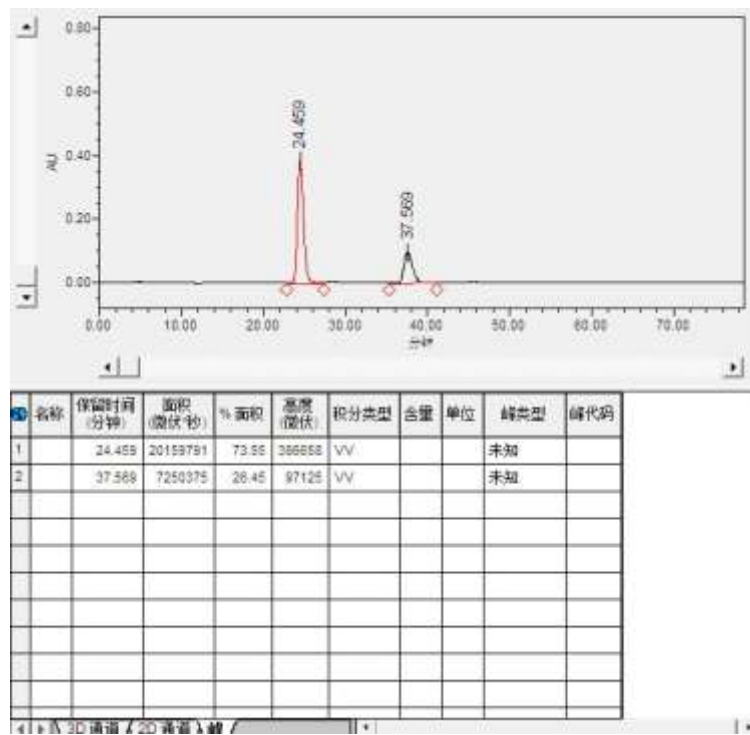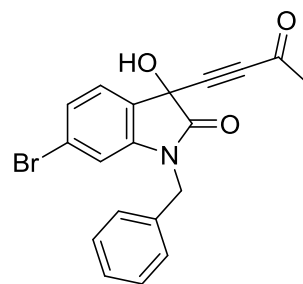

S48



### 1-benzyl-6-bromo-3-hydroxy-3-(3-oxobut-1-yn-1-yl)indolin-2-one (1t)

A white solid, 62% yield (1187 mg). M.p.: 174-176 °C.  $^1\text{H}$  NMR ( $\text{CDCl}_3$ , TMS, 400 MHz)  $\delta$  2.34 (s, 3H,  $\text{CH}_3$ ), 4.28 (s, 1H, OH), 4.84-4.93 (m, 2H,  $\text{CH}_2$ ), 6.90 (s, 1H, ArH), 7.25-7.42 (m, 7H, ArH).  $^{13}\text{C}$  NMR ( $\text{CDCl}_3$ , TMS, 100 MHz)  $\delta$  32.5, 44.4, 68.7, 84.3, 85.4, 113.6, 124.9, 126.1, 126.3, 127.0, 127.1, 128.2, 129.1, 134.0, 143.4, 172.8, 183.4. IR (EtOH)  $\nu$  3313, 3060, 3024, 2202, 1719, 1681, 1608, 1486, 1369, 1212, 998, 825  $\text{cm}^{-1}$ . HRMS (ESI) Calcd. For  $\text{C}_{19}\text{H}_{18}\text{BrN}_2\text{O}_3$   $^{+1}(\text{M}+\text{NH}_4)^+$  requires 401.0495, Found: 401.0489.

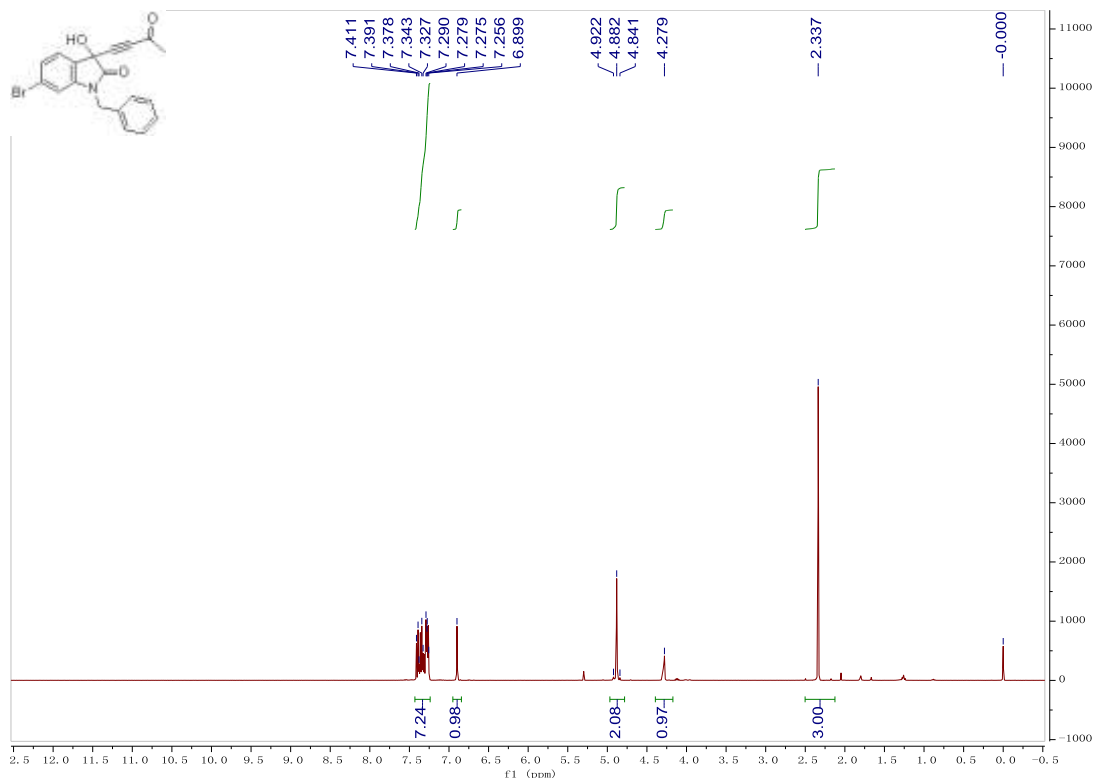

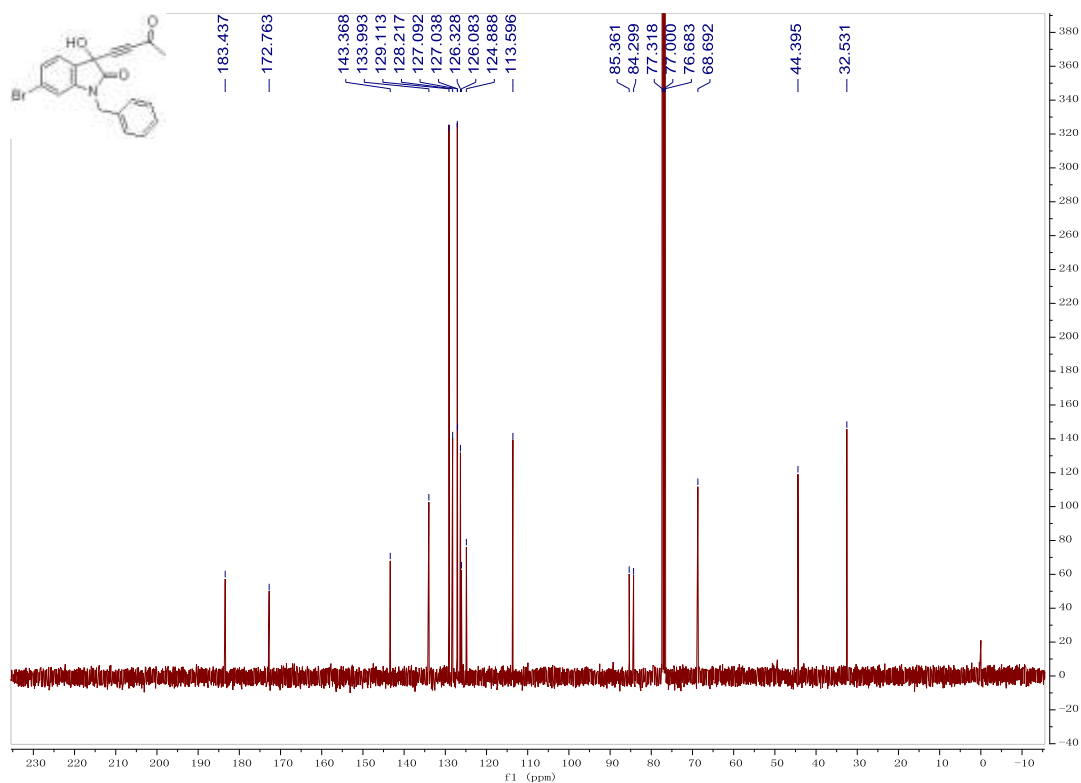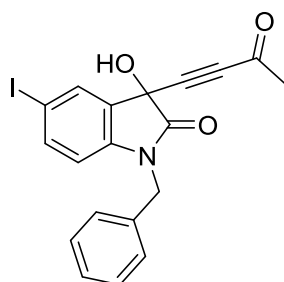

**1-benzyl-3-hydroxy-5-iodo-3-(3-oxobut-1-yn-1-yl)indolin-2-one (1u)**

A white solid, 55% yield (1185 mg). M.p.: 172-174 °C.  $^1\text{H}$  NMR ( $\text{CDCl}_3$ , TMS, 400 MHz)  $\delta$  2.35 (s, 3H,  $\text{CH}_3$ ), 4.54 (br, 1H, OH), 4.86 (d,  $J = 15.6$  Hz, 1H,  $\text{CH}_2$ ), 4.92 (d,  $J = 15.6$  Hz, 1H,  $\text{CH}_2$ ), 6.51 (d,  $J = 8.4$  Hz, 1H, ArH), 7.24-7.36 (m, 5H, ArH), 7.58 (d,  $J = 8.4$  Hz, 1H, ArH), 7.82 (s, 1H, ArH).  $^{13}\text{C}$  NMR ( $\text{CDCl}_3$ , TMS, 100 MHz)  $\delta$  32.5, 44.3, 68.7, 84.4, 85.4, 86.5, 112.2, 127.1, 128.2, 129.0, 129.2, 133.8, 134.0, 139.8, 141.7, 172.3, 183.5. IR (EtOH)  $\nu$  3290, 2228, 1726, 1681, 1354, 1338, 1074, 992, 800, 729, 699  $\text{cm}^{-1}$ . HRMS (ESI) Calcd. For  $\text{C}_{19}\text{H}_{18}\text{IN}_2\text{O}_3^{+1}(\text{M}+\text{NH}_4)^+$  requires 449.0357, Found: 449.0349.

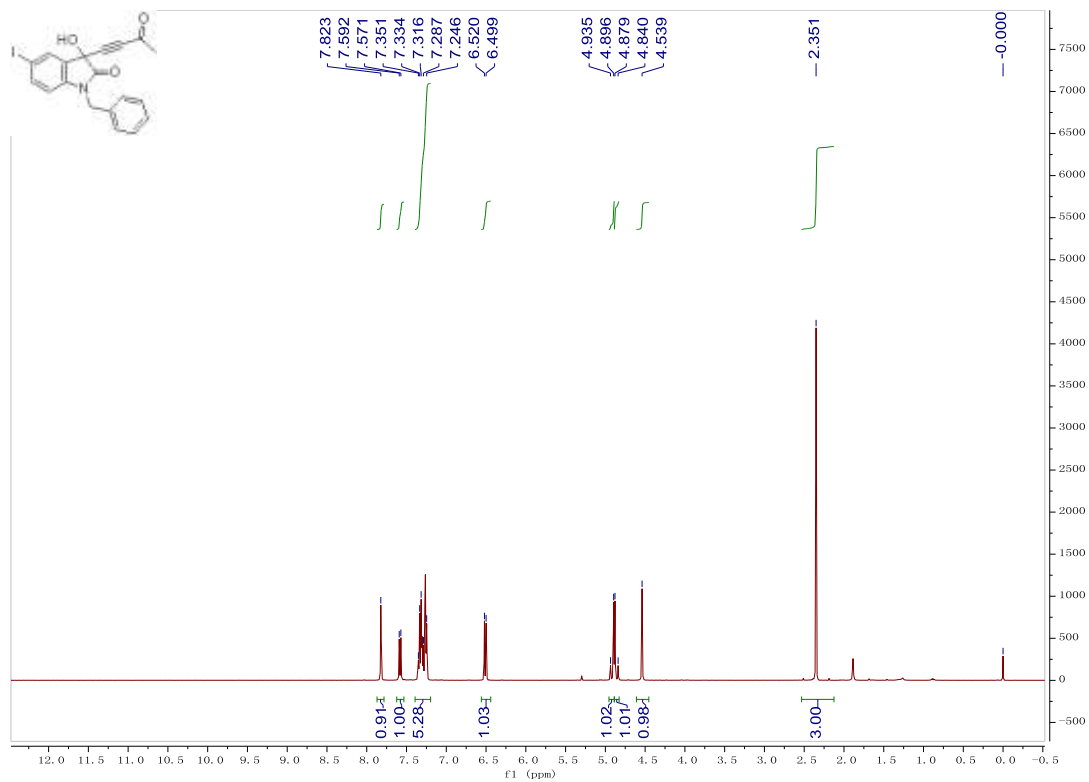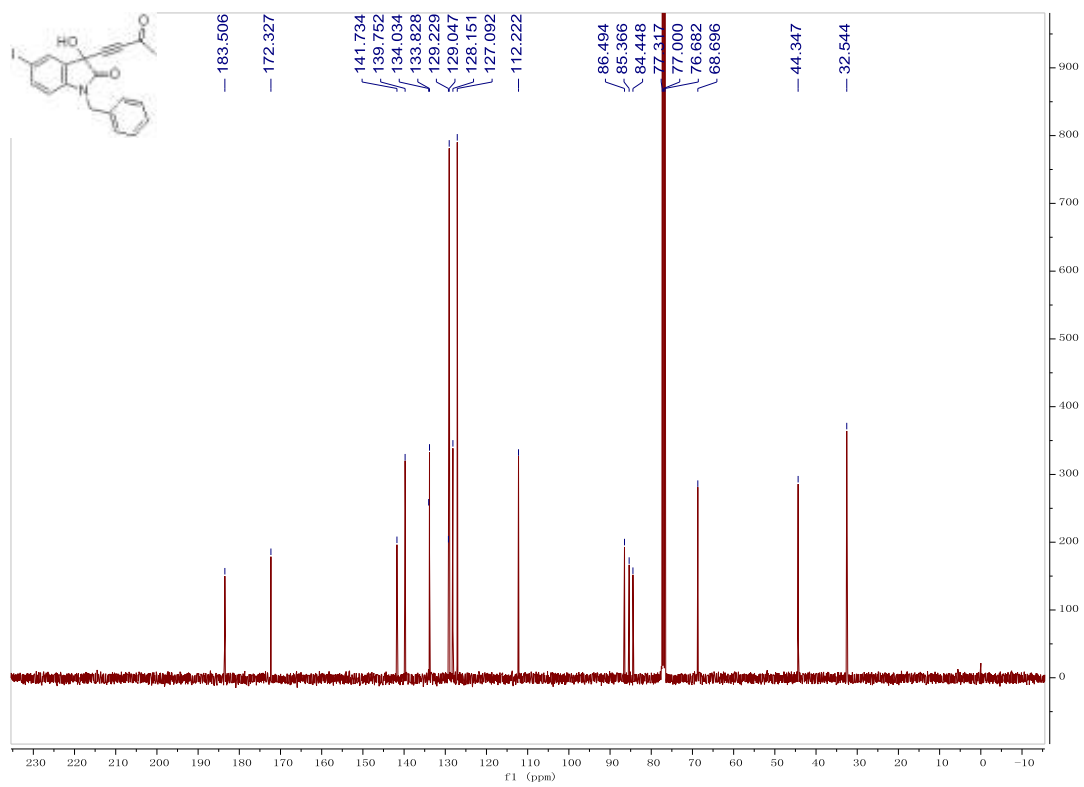

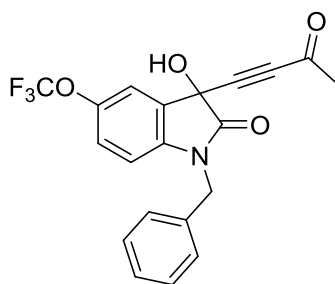

**1-benzyl-3-hydroxy-3-(3-oxobut-1-yn-1-yl)-5-(trifluoromethoxy)indolin-2-one (1v)**

A white solid, 60% yield (1167 mg). M.p.: 141-143 °C.  $^1\text{H}$  NMR ( $\text{CDCl}_3$ , TMS, 400 MHz)  $\delta$  2.34 (s, 3H,  $\text{CH}_3$ ), 4.80 (s, 1H, OH), 4.87-4.97 (m, 2H,  $\text{CH}_2$ ), 6.74 (d,  $J = 8.4$  Hz, 1H, ArH), 7.14 (dd,  $J = 1.2, 8.8$  Hz, 1H, ArH), 7.27-7.37 (m, 5H, ArH), 7.44 (s, 1H, ArH).  $^{13}\text{C}$  NMR ( $\text{CDCl}_3$ , TMS, 100 MHz)  $\delta$  32.5, 44.5, 69.0, 84.5, 85.2, 110.9, 119.0, 120.4 (q,  $J = 256.1$  Hz), 124.0, 127.1, 128.2, 128.6, 129.1, 134.0, 140.6, 145.6 (q,  $J = 2.2$  Hz), 173.0, 183.5.  $^{19}\text{F}$  NMR (376 MHz,  $\text{CDCl}_3$ ,  $\text{CFCl}_3$ )  $\delta$  -58.33. IR (EtOH)  $\nu$  3287, 2922, 2223, 1728, 1682, 1496, 1265, 1212, 1144, 1121  $\text{cm}^{-1}$ . HRMS (ESI) Calcd. For  $\text{C}_{20}\text{H}_{18}\text{F}_3\text{N}_2\text{O}_4$   $^{+1}(\text{M}+\text{NH}_4)^+$  requires 407.1213, Found: 407.1207.  $[\alpha]_D^{25} = -19.44$  (c 0.06,  $\text{CH}_2\text{Cl}_2$ ) for 65% *ee*; Enantiomeric excess was determined by HPLC with a Chiralcel AD-H column, Hexane/*i*PrOH = 90/10, 0.7 mL/min, 254 nm,  $t_{\text{minor}} = 22.150$  min,  $t_{\text{major}} = 17.017$  min.

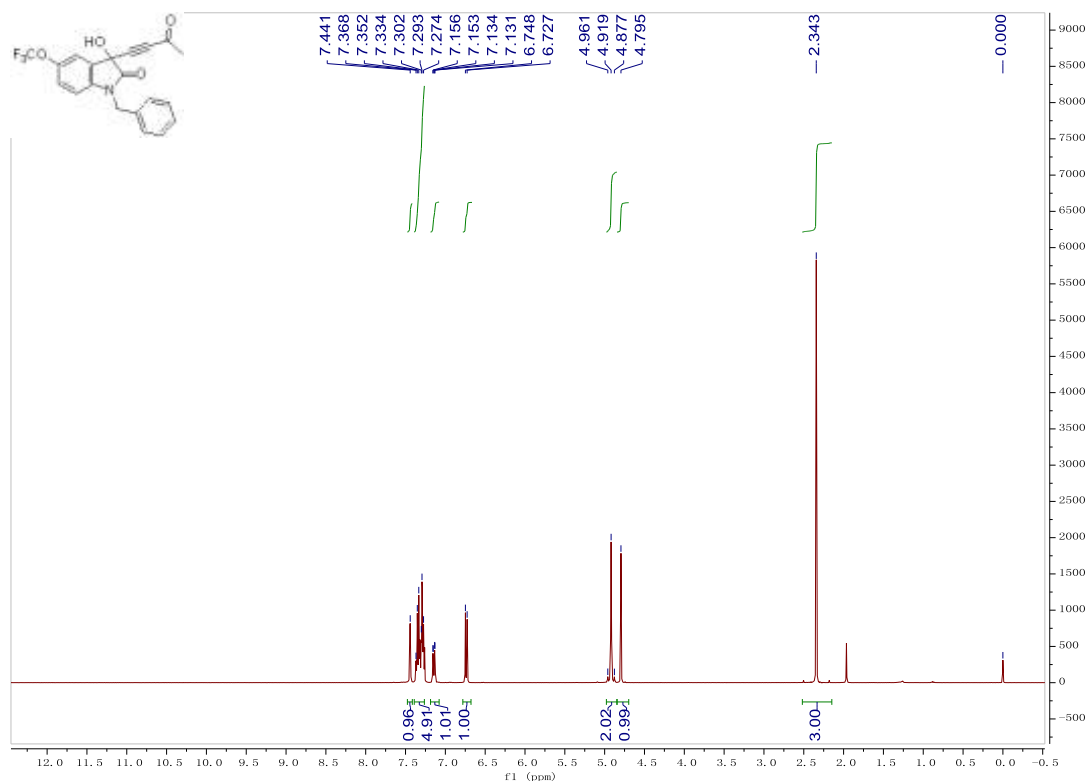

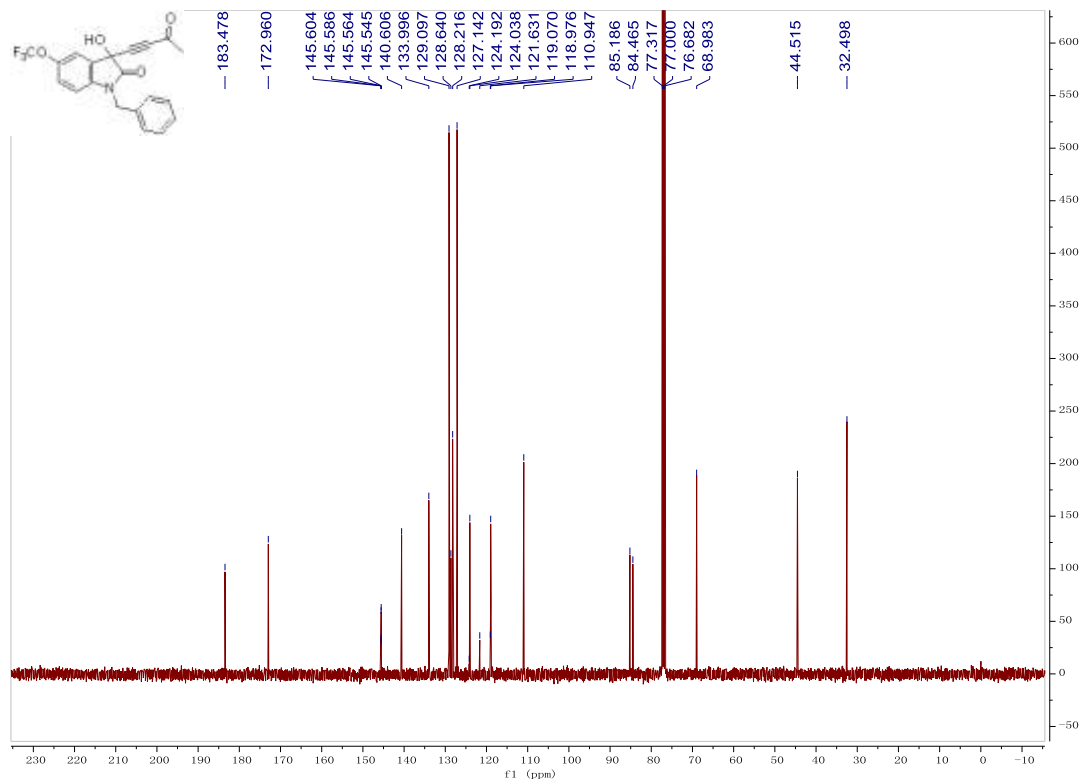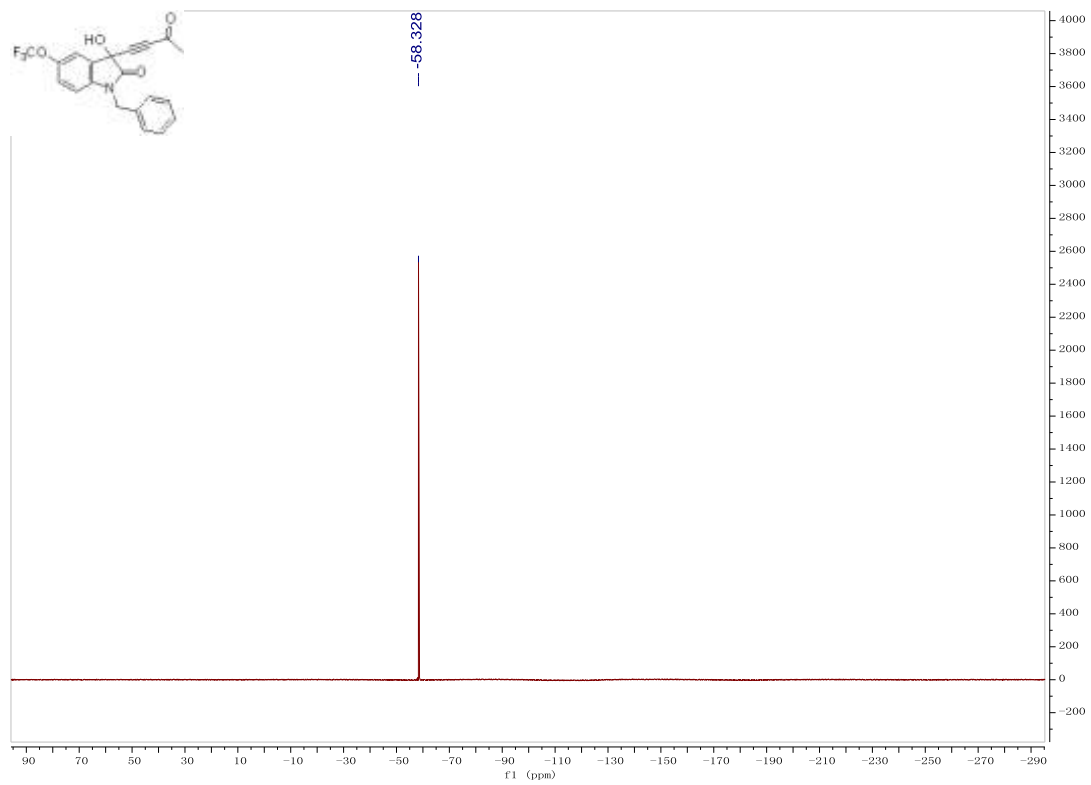

实验时间: 2019-07-18, 15:43:22  
谱图文件: D:\Sun Yaoliang\co2\17-96-b-rac.org

实验者:  
报告时间: 2019-07-18, 16:34:09  
积分方法: 面积归一法

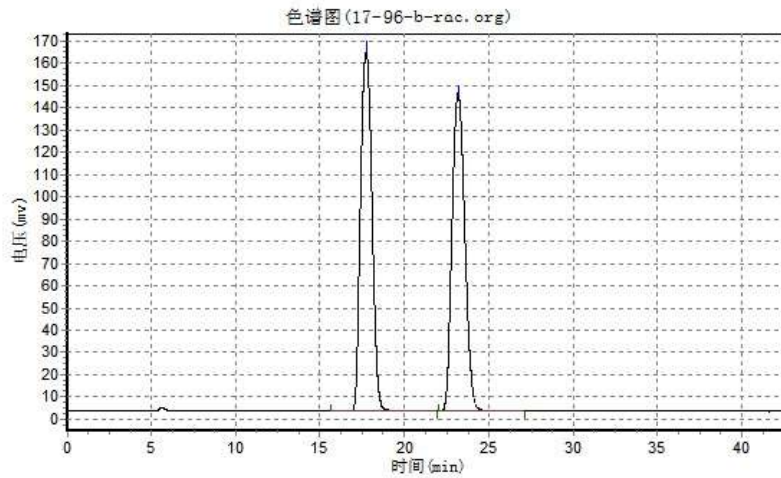

分析结果表

| 峰号 | 峰名 | 保留时间   | 峰高         | 峰面积          | 含量       |
|----|----|--------|------------|--------------|----------|
| 1  |    | 17.765 | 161217.828 | 7629069.000  | 50.3129  |
| 2  |    | 23.198 | 142526.281 | 7534177.500  | 49.6871  |
| 总计 |    |        | 303744.109 | 15163246.500 | 100.0000 |

实验时间: 2019-07-18, 16:47:17  
谱图文件: D:\Sun Yaoliang\co2\17-96-b-asy.org

实验者:  
报告时间: 2019-07-18, 16:48:13  
积分方法: 面积归一法

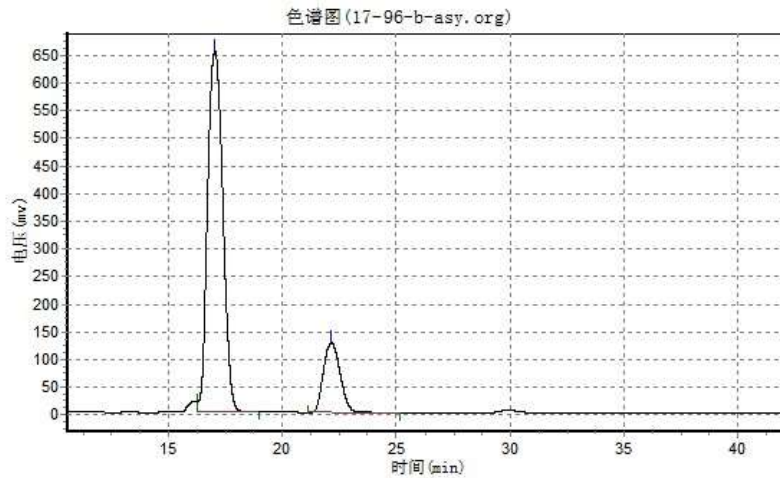

分析结果表

| 峰号 | 峰名 | 保留时间   | 峰高         | 峰面积          | 含量       |
|----|----|--------|------------|--------------|----------|
| 1  |    | 17.017 | 652116.438 | 30440106.000 | 82.4970  |
| 2  |    | 22.150 | 125830.992 | 6458331.000  | 17.5030  |
| 总计 |    |        | 777947.430 | 36898437.000 | 100.0000 |

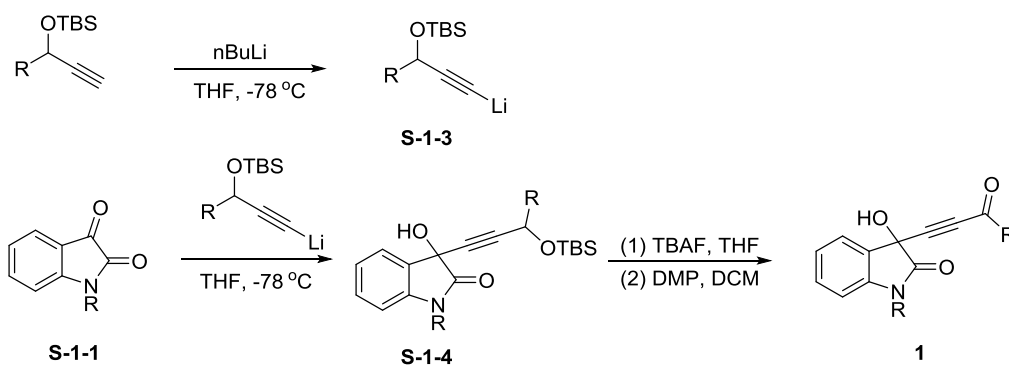

Substrates **1w-1z** was synthesized through the **method 2** as below.

## Method 2

**Step 1:** To a solution of propargyl silicon ether **S-1-3** (5.0 mmol, 1.0 equiv) in dry THF (20 mL) was added n-butyllithium solution (6.0 mmol, 1.2 equiv) under  $-78\text{ }^\circ\text{C}$ . After stirring for one hour, the fresh prepared alkynyl lithium reagent was added to a solution of isatin derivative **S-1-1** (6.0 mmol, 1.2 equiv) in dry THF (20 mL) under  $-78\text{ }^\circ\text{C}$ . Then, the resulting reaction mixture was stirred at  $-78\text{ }^\circ\text{C}$  for one hour. After warm up to room temperature, saturated ammonium chloride solution was added to quench the reaction. The reaction was extracted with ethyl acetate three times and washed by water. Then the reaction mixture was concentrated under high vacuum and purified by a column chromatography on silica gel to give the crude products **SI-1-4** (DCM:EA = 10:1 ~ 2:1).

**Step 2:** The crude product **SI-1-4** was dispersed in 10 mL THF and TBAF solution (6.0 mL, 1.0 M, 1.2 equiv) was added. The reaction mixture was stirred for 20 mins and traced by TLC. After the reaction was completed, water was added to quench the reaction. The reaction was extracted with ethyl acetate three times and washed by water. Then the reaction mixture was concentrated under high vacuum. Then, the crude product was dispersed in 10 mL DCM and Dess-martin oxidizer (6.0 mmol, 1.2 equiv) was added. The reaction mixture was stirred for 20 mins and traced by TLC. After the reaction was completed, water was added to quench the reaction. The reaction was extracted with ethyl acetate three times and washed by water. The organic phase was concentrated under high vacuum and purified by a column chromatography on silica gel to give the desired products **1** (DCM:EA = 10:1 ~ 2:1).

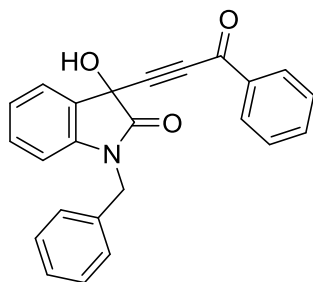

**1-benzyl-3-hydroxy-3-(3-oxo-3-phenylprop-1-yn-1-yl)indolin-2-one (1w)**

A white solid, 41% yield (752 mg). M.p.: 158-160 °C. <sup>1</sup>H NMR (CDCl<sub>3</sub>, TMS, 400 MHz) δ 4.74-4.92 (m, 2H, OH, CH<sub>2</sub>), 4.97 (d, *J* = 16.0 Hz, 1H, CH<sub>2</sub>), 6.75 (d, *J* = 7.6 Hz, 1H, ArH), 7.13 (t, *J* = 7.2 Hz, 1H, ArH), 7.25-7.31 (m, 6H, ArH), 7.41 (dt, *J* = 2.0, 8.0 Hz, 1H, ArH), 7.57 (t, *J* = 7.6 Hz, 1H, ArH), 7.62 (d, *J* = 7.6 Hz, 1H, ArH), 8.09 (d, *J* = 8.0 Hz, 1H, ArH). <sup>13</sup>C NMR (CDCl<sub>3</sub>, TMS, 100 MHz) δ 44.3, 69.4, 82.7, 89.0, 110.2, 124.2, 125.1, 127.1, 127.4, 127.9, 128.6, 129.0, 129.7, 131.0, 134.46, 134.53, 136.1, 142.1, 173.2, 177.0. IR (EtOH) ν 3371, 3055, 3024, 2218, 1718, 1642, 1487, 1173, 1128, 704 cm<sup>-1</sup>. HRMS (ESI) Calcd. For C<sub>24</sub>H<sub>21</sub>N<sub>2</sub>O<sub>3</sub><sup>+</sup>(M+NH<sub>4</sub>)<sup>+</sup> requires 385.1547, Found: 385.1543.

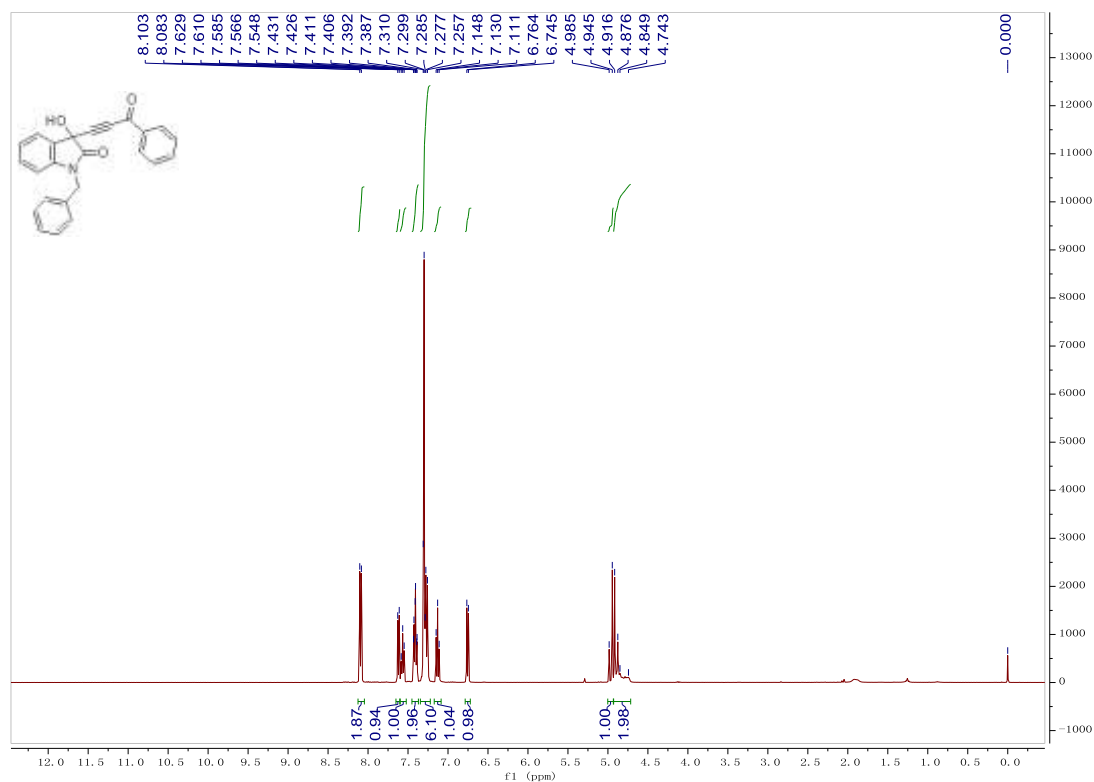



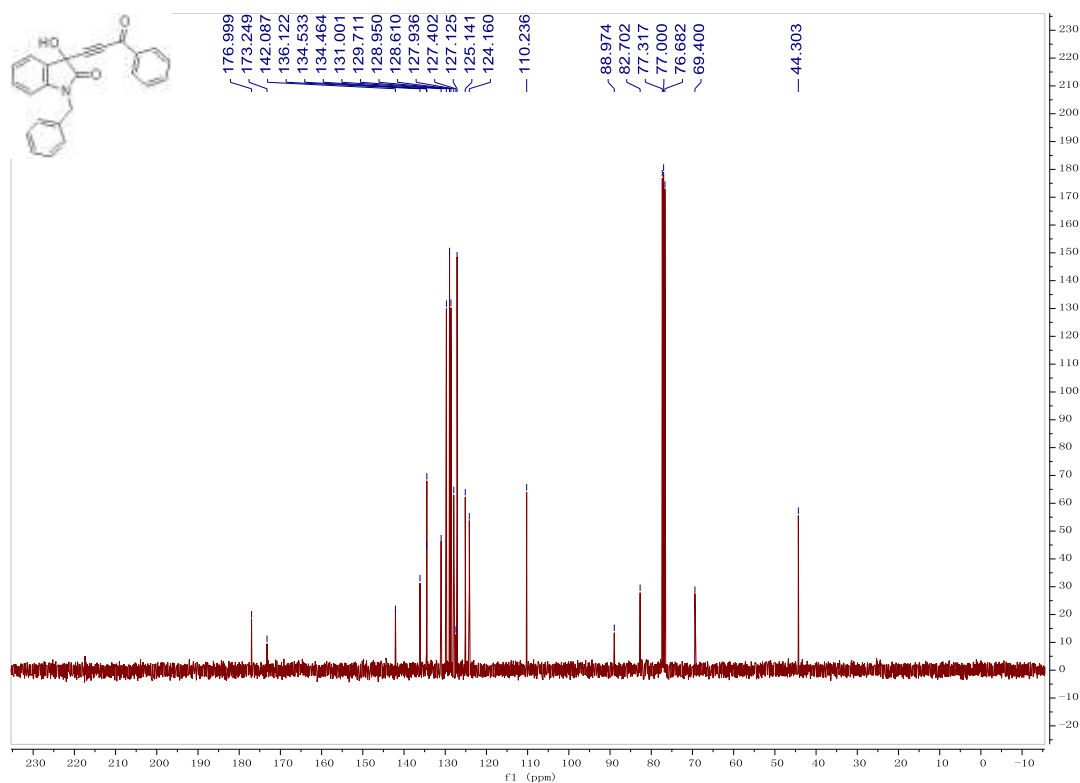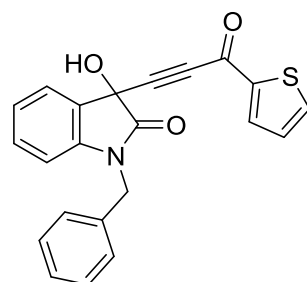

### 1-benzyl-3-hydroxy-3-(3-oxo-3-(thiophen-2-yl)prop-1-yn-1-yl)indolin-2-one (1x)

A white solid, 46% yield (899 mg). M.p.: 164-166 °C.  $^1\text{H}$  NMR ( $\text{CDCl}_3$ , TMS, 400 MHz)  $\delta$  4.09 (s, 1H, OH), 4.91 (d,  $J = 15.6$  Hz, 1H,  $\text{CH}_2$ ), 4.97 (d,  $J = 15.6$  Hz, 1H,  $\text{CH}_2$ ), 6.77 (d,  $J = 8.0$  Hz, 1H, ArH), 7.10-7.16 (m, 2H, ArH), 7.27-7.36 (m, 6H, ArH), 7.61 (d,  $J = 7.6$  Hz, 1H, ArH), 7.71 (d,  $J = 4.8$  Hz, 1H, ArH), 7.93 (d,  $J = 4.0$  Hz, 1H, ArH).  $^{13}\text{C}$  NMR ( $\text{CDCl}_3$ , TMS, 100 MHz)  $\delta$  44.3, 69.3, 82.2, 87.4, 110.2, 124.1, 125.2, 127.1, 127.2, 128.0, 128.5, 129.0, 131.1, 134.6, 136.0, 136.3, 142.2, 144.1, 168.6, 172.9. IR (EtOH)  $\nu$  3300, 3094, 3021, 3000, 2215, 1711, 1610, 1408, 1054, 853, 749  $\text{cm}^{-1}$ . HRMS (ESI) Calcd. For  $\text{C}_{22}\text{H}_{19}\text{N}_2\text{O}_3\text{S}^+(\text{M}+\text{NH}_4)^+$  requires 391.1111, Found: 391.1107.

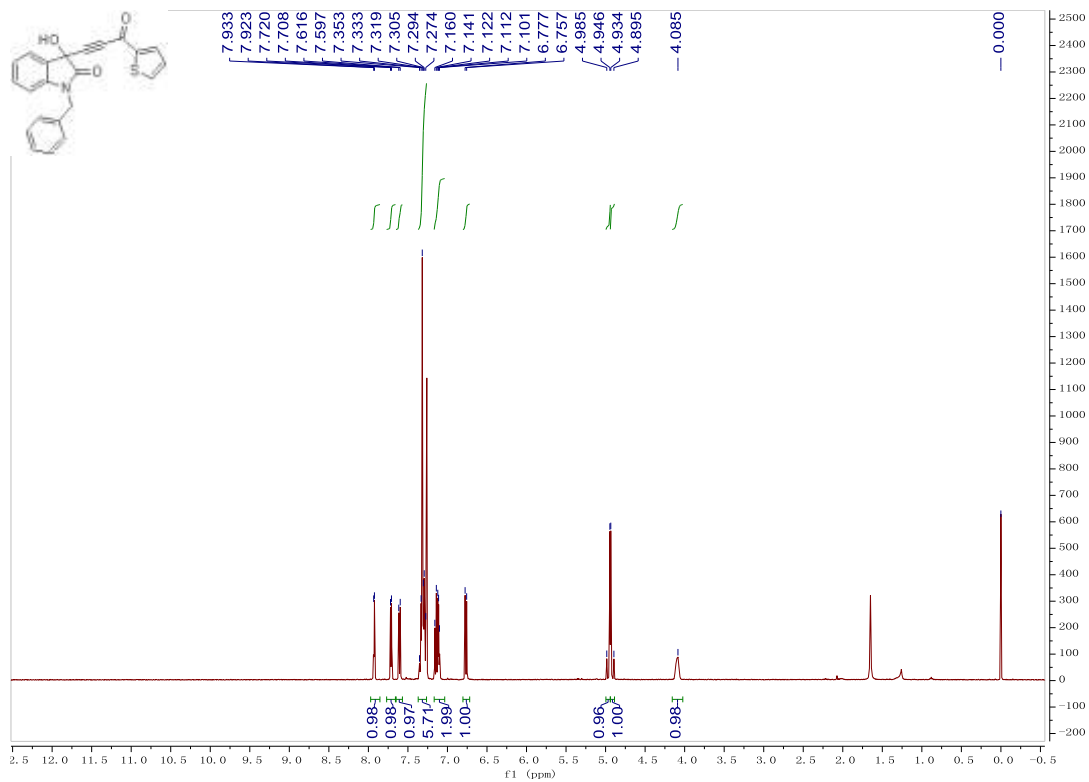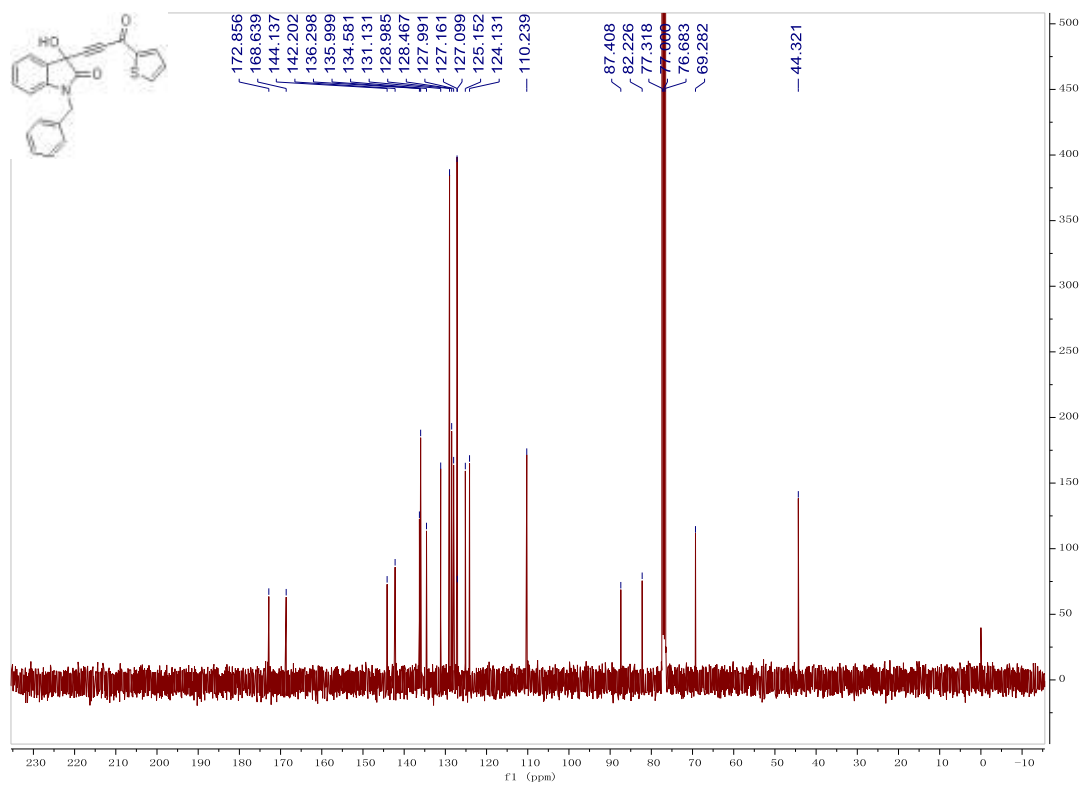

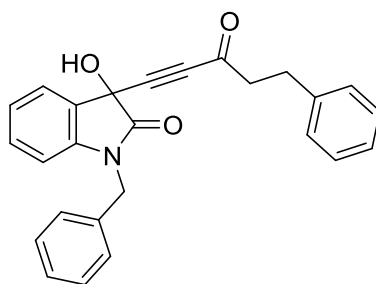

**1-benzyl-3-hydroxy-3-(3-oxo-5-phenylpent-1-yn-1-yl)indolin-2-one (1y)**

A white solid, 37% yield (730 mg). M.p.: 132-134 °C. <sup>1</sup>H NMR (CDCl<sub>3</sub>, TMS, 400 MHz) δ 2.88-2.97 (m, 4H, CH<sub>2</sub>), 4.10 (s, 1H, OH), 4.86 (d, *J* = 15.6 Hz, 1H, CH<sub>2</sub>), 4.91 (d, *J* = 15.6 Hz, 1H, CH<sub>2</sub>), 6.73 (d, *J* = 8.0 Hz, 1H, ArH), 7.09-7.21 (m, 4H, ArH), 7.24-7.34 (m, 8H, ArH), 7.52 (d, *J* = 7.2 Hz, 1H, ArH). <sup>13</sup>C NMR (CDCl<sub>3</sub>, TMS, 100 MHz) δ 29.5, 44.3, 46.8, 69.1, 83.6, 87.0, 110.2, 124.1, 125.0, 126.3, 127.12, 127.14, 128.0, 128.3, 128.5, 129.0, 134.5, 139.8, 142.1, 172.9, 185.8. IR (EtOH) ν 3319, 3026, 2932, 2212, 1701, 1677, 1175, 1158, 736, 695 cm<sup>-1</sup>. HRMS (ESI) Calcd. For C<sub>26</sub>H<sub>25</sub>N<sub>2</sub>O<sub>3</sub><sup>+1</sup>(M+NH<sub>4</sub>)<sup>+</sup> requires 413.1860, Found: 413.1854.

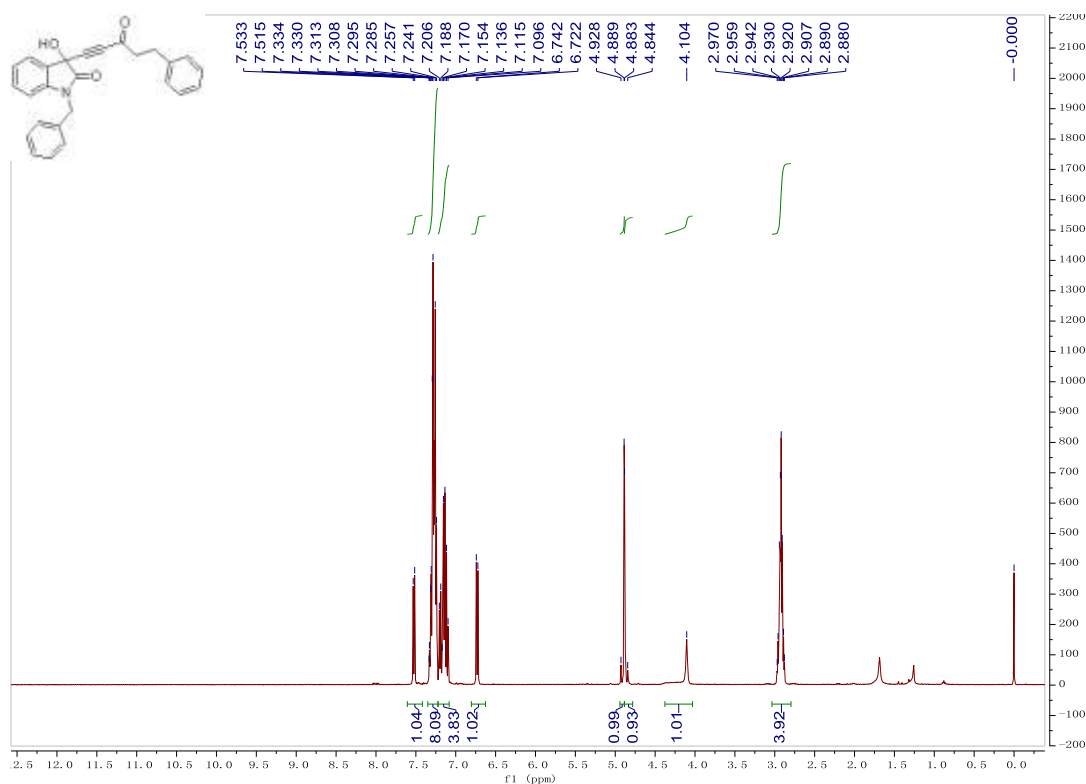

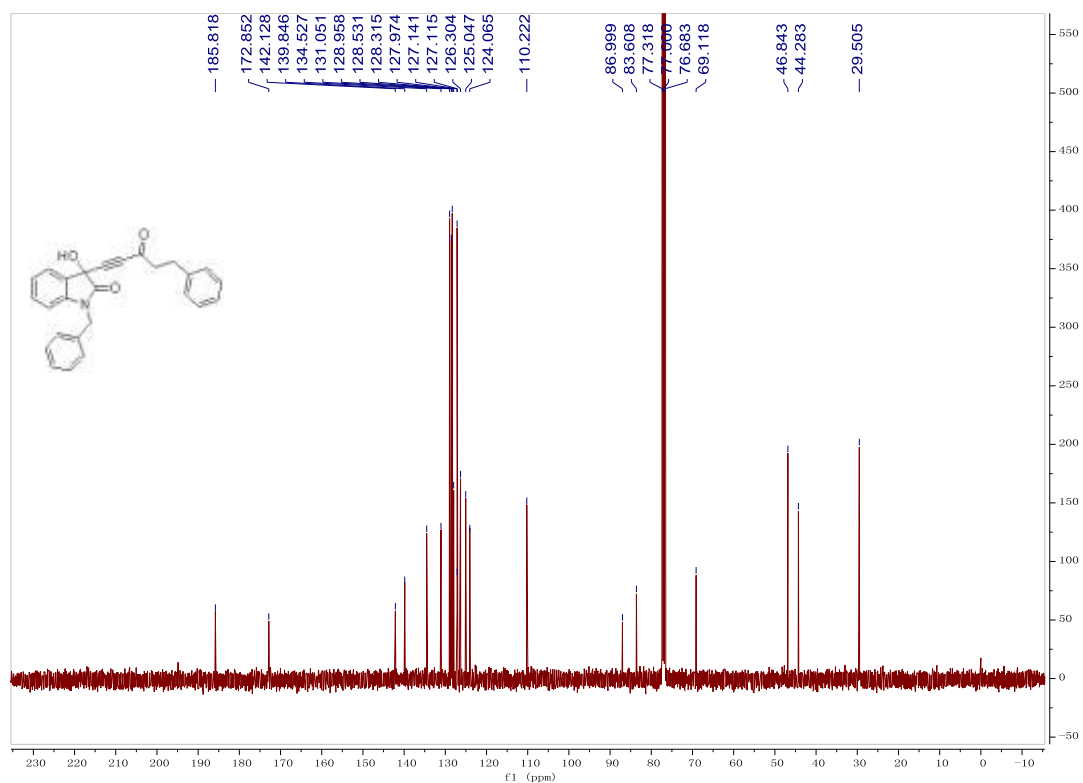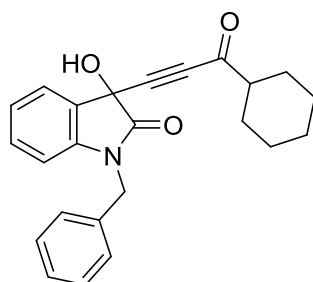

**1-benzyl-3-(3-cyclohexyl-3-oxoprop-1-yn-1-yl)-3-hydroxyindolin-2-one (1z)**

A white solid, 49% yield (921 mg). M.p.: 139-141 °C.  $^1\text{H}$  NMR ( $\text{CDCl}_3$ , TMS, 400 MHz)  $\delta$  1.14-1.42 (m, 5H,  $\text{CH}_2$ ), 1.61-1.76 (m, 3H,  $\text{CH}_2$ ), 1.93-1.97 (m, 1H,  $\text{CH}_2$ ), 2.37-2.45 (m, 1H, CH), 4.27 (s, 1H, OH), 4.88 (d,  $J = 15.6$  Hz, 1H,  $\text{CH}_2$ ), 4.95 (d,  $J = 15.6$  Hz, 1H,  $\text{CH}_2$ ), 6.74 (d,  $J = 8.0$  Hz, 1H, ArH), 7.12 (t,  $J = 7.6$  Hz, 1H, ArH), 7.24-7.35 (m, 6H, ArH), 7.54 (d,  $J = 7.6$  Hz, 1H, ArH).  $^{13}\text{C}$  NMR ( $\text{CDCl}_3$ , TMS, 100 MHz)  $\delta$  25.2, 25.3, 25.6, 27.87, 27.95, 44.2, 52.1, 69.2, 83.2, 87.3, 110.2, 124.0, 125.0, 127.1, 127.3, 127.9, 128.9, 131.0, 134.6, 142.1, 173.0, 190.4. IR (EtOH)  $\nu$  3332, 2925, 2853, 1735, 1709, 1673, 1654, 1559, 1486, 1376, 1174, 751  $\text{cm}^{-1}$ . HRMS (ESI) Calcd. For  $\text{C}_{24}\text{H}_{27}\text{N}_2\text{O}_3^{+1}(\text{M}+\text{NH}_4)^+$  requires 391.2016, Found: 391.2006.

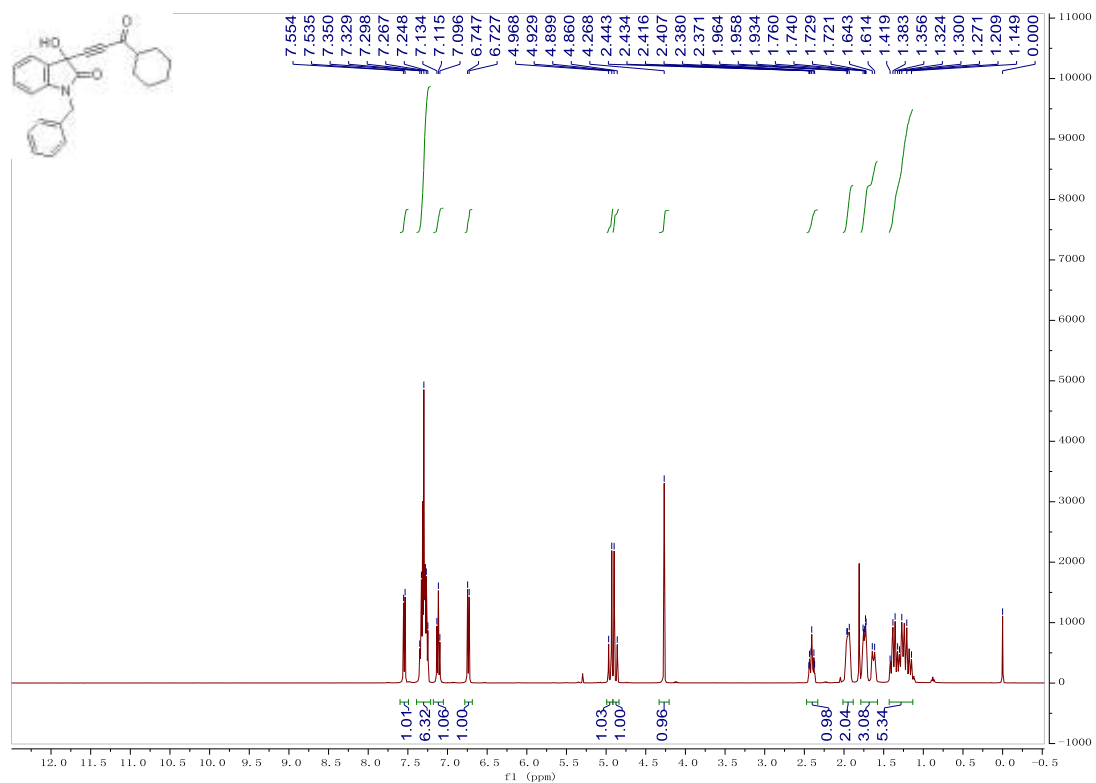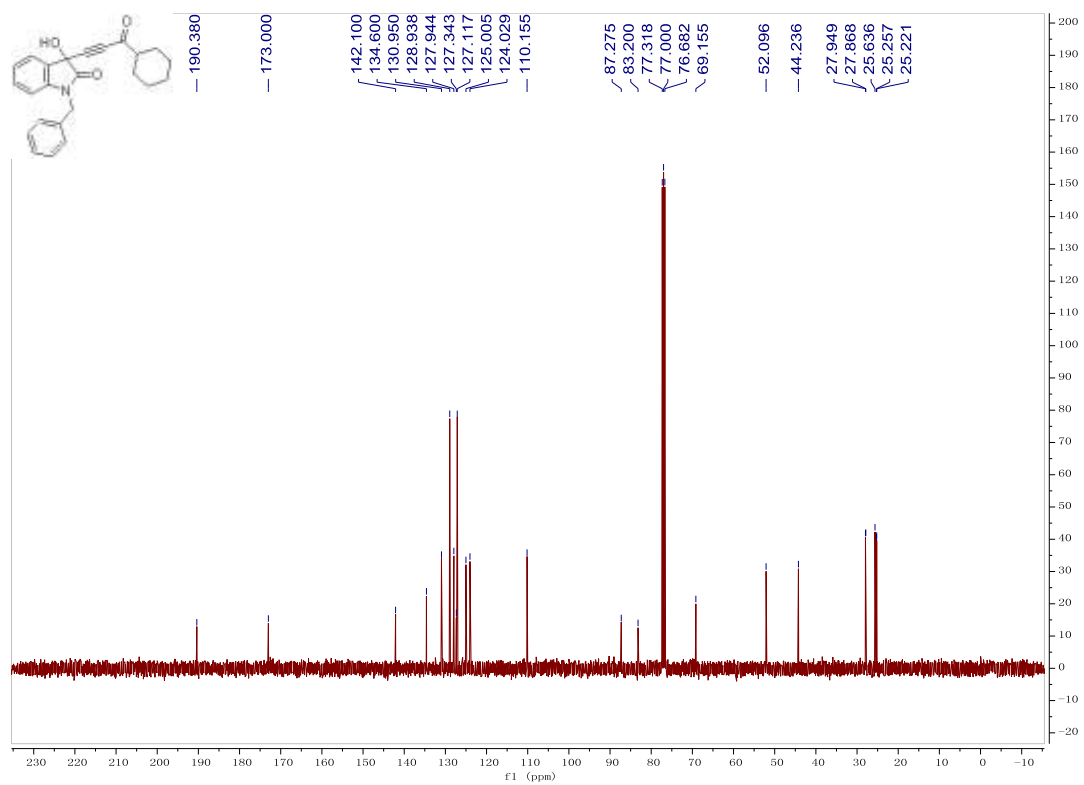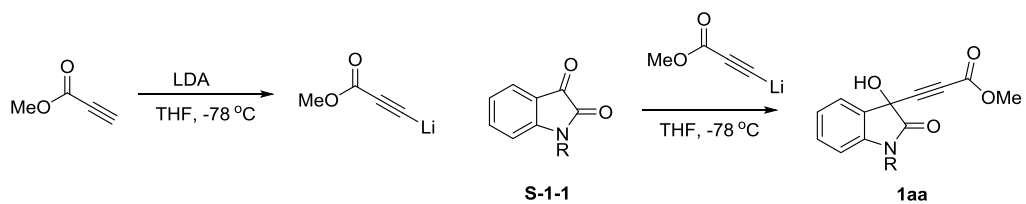

Substrates **1aa** was synthesized through the **method 3** as below.

### Method 3

**Step 1:** To a solution of methyl propiolate (5.0 mmol, 1.0 equiv) in dry THF (10 mL) was added LDA (Lithium diisopropylamide) solution (5.0 mmol, 1.0 equiv) under -78 °C. After stirring for one hour, the fresh alkynyl lithium reagent was added to a solution of isatin derivative **S-1-1** (6.0 mmol, 1.2 equiv) in dry THF (10 mL) under -78 °C. Then, the resulting reaction mixture was stirred at -78 °C for one hour. After warm up to room temperature, the reaction mixture was continued to stirred for another 2 hours. Then, 20 mL water was added to quench the reaction. The mixture was extracted with ethyl acetate three times and washed by water. Then the organic phase was concentrated under high vacuum and purified by a column chromatography on silica gel to give the products **1aa** (DCM:EA = 10:1 ~ 4:1).

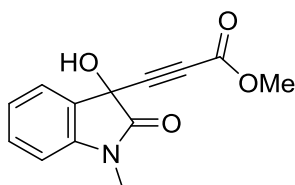

### methyl 3-(3-hydroxy-1-methyl-2-oxoindolin-3-yl)propiolate (**1aa**)

A white solid, 53% yield (649 mg). M.p.: 142-144 °C. <sup>1</sup>H NMR (CDCl<sub>3</sub>, TMS, 400 MHz) δ 3.25 (s, 3H, CH<sub>3</sub>), 3.84 (s, 3H, CH<sub>3</sub>), 5.37 (s, 1H, OH), 6.92 (d, *J* = 8.0 Hz, 1H, ArH), 7.13 (t, *J* = 7.2 Hz, 1H, ArH), 7.21 (d, *J* = 7.6 Hz, 1H, ArH), 7.44 (t, *J* = 8.0 Hz, 1H, ArH). <sup>13</sup>C NMR (CDCl<sub>3</sub>, TMS, 100 MHz) δ 26.9, 60.0, 82.9, 89.8, 109.2, 122.2, 123.5, 124.5, 131.8, 144.7, 169.2, 171.3, 178.1. IR (EtOH) ν 3536, 3115, 2948, 1773, 1732, 1635, 1493, 1344, 1190, 1007, 783, 753 cm<sup>-1</sup>. HRMS (ESI) Calcd. For C<sub>13</sub>H<sub>15</sub>N<sub>2</sub>O<sub>4</sub><sup>+1</sup>(M+NH<sub>4</sub>)<sup>+</sup> requires 263.1026, Found: 263.1022.

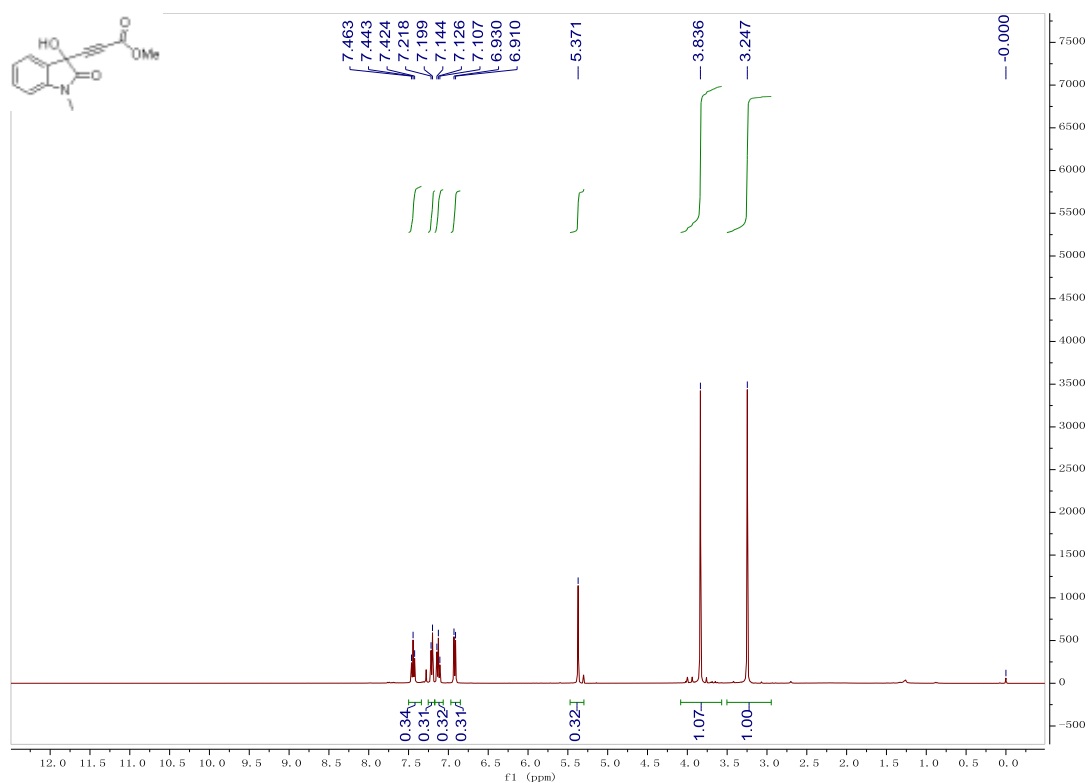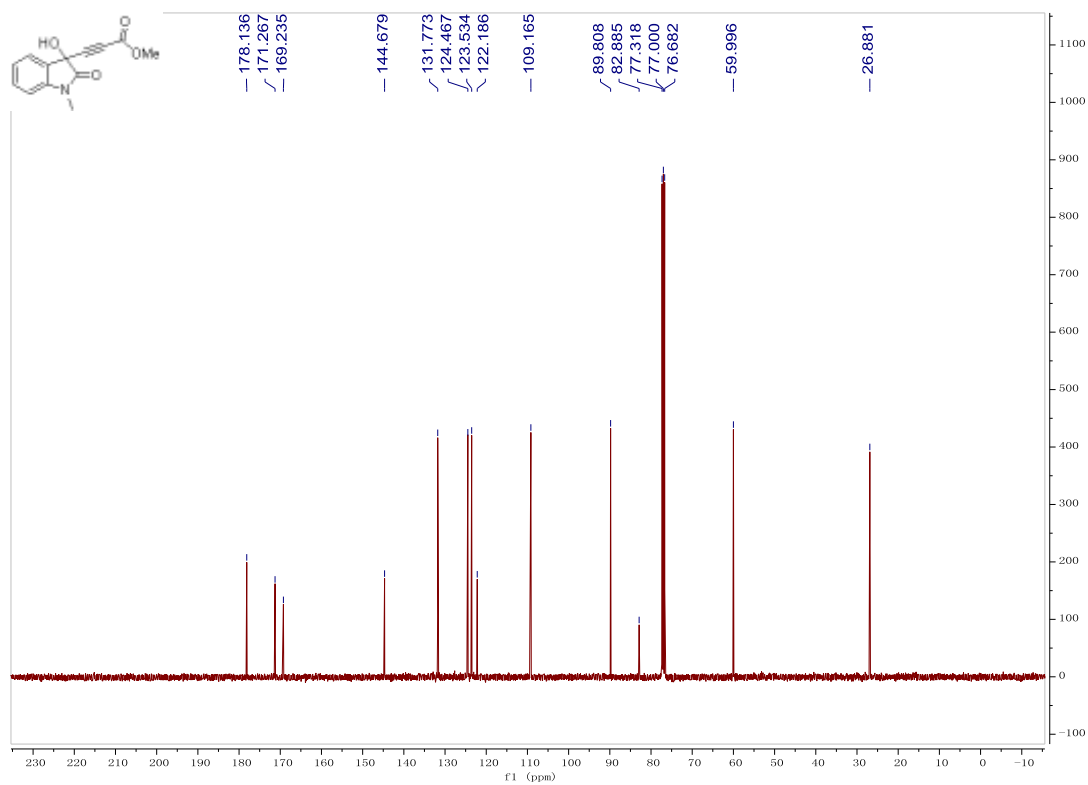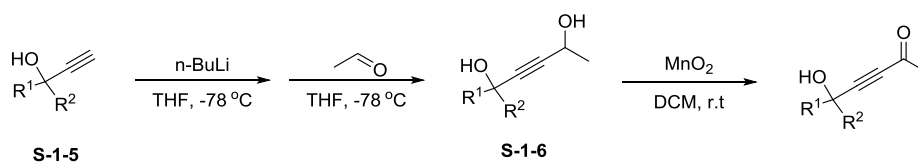

Substrates **1ab**, **1ad-1af** was synthesized through the **method 4** as below.

#### Method 4

**Step 1:** To a solution of propargyl alcohol **S-1-5** (5.0 mmol, 1.0 equiv) in dry THF (10 mL) was added n-butyllithium solution (11.0 mmol, 2.2 equiv) under -78 °C. After stirring for one hour, pure acetaldehyde (6.0 mmol, 1.2 equiv) was added to the solution under -78 °C. Then, the resulting reaction mixture was stirred at -78 °C for one hour. After warm up to room temperature, the reaction mixture was continued to stirred for another 2 hours. Then, 20 mL water was added to quench the reaction. The mixture was extracted with ethyl acetate three times and washed by water. Then the organic phase was concentrated under high vacuum and purified by a short column chromatography on silica gel to give the crude products **S-1-6** (DCM:EA = 20:1 ~ 4:1).

**Step 2:** The crude product **S-1-6** was dispersed in 10 mL DCM, and activated manganese dioxide powder was added in small batch until the **S-1-6** was totally consumed. Then the reaction mixture filtered through celite to remove solid impurities and concentrated under high vacuum. After that, crude product was purified by a column chromatography on silica gel to give the desired products **1** (DCM:EA = 20:1 ~ 4:1).

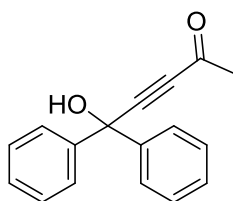

#### 5-hydroxy-5,5-diphenylpent-3-yn-2-one (**1ab**)

A white solid, 31% yield (386 mg). M.p.: 87-89 °C. <sup>1</sup>H NMR (CDCl<sub>3</sub>, TMS, 400 MHz) δ 2.40 (s, 3H, CH<sub>3</sub>), 3.10 (s, 1H, OH), 7.28-7.37 (m, 6H, ArH), 7.55 (d, *J* = 7.6 Hz, 4H, ArH). <sup>13</sup>C NMR (CDCl<sub>3</sub>, TMS, 100 MHz) δ 32.7, 74.4, 85.7, 92.5, 125.9, 128.3, 128.5, 143.1, 184.3. IR (EtOH) ν 3396, 2921, 2851, 1674, 1449, 1358, 1227, 1095, 1032, 1010, 891 cm<sup>-1</sup>. HRMS (ESI) Calcd. For C<sub>17</sub>H<sub>18</sub>NO<sub>2</sub><sup>+1</sup>(M+NH<sub>4</sub>)<sup>+</sup> requires 268.1332, Found: 268.1327.



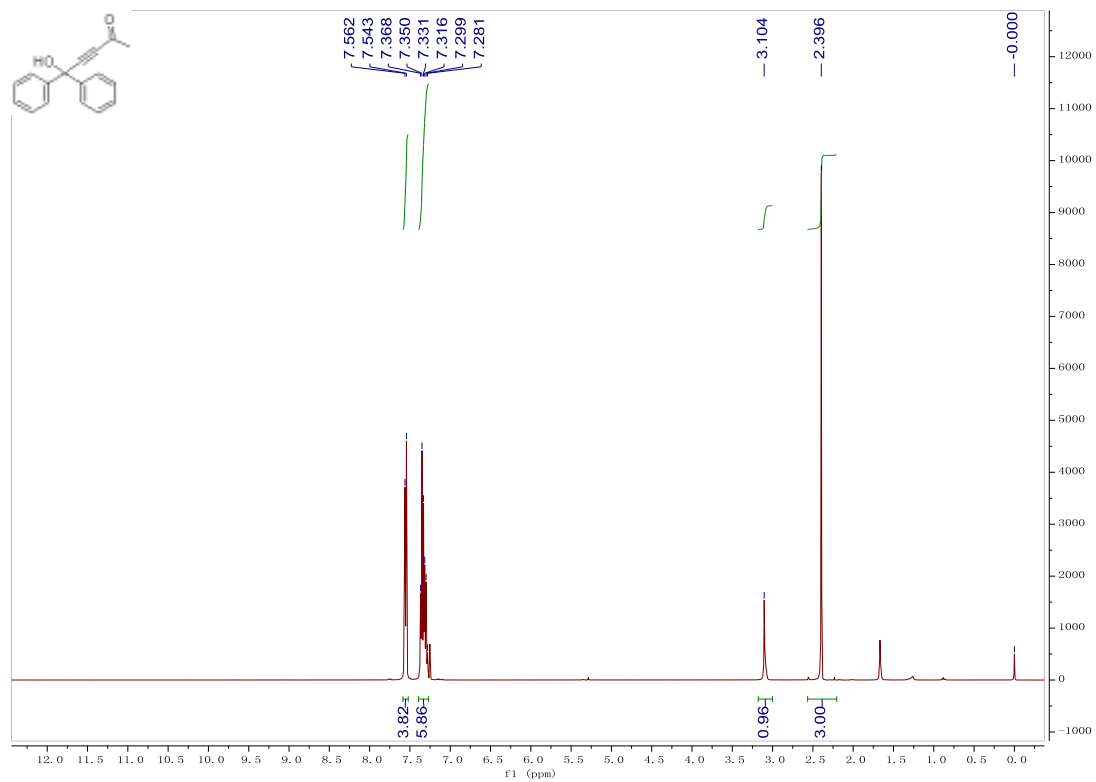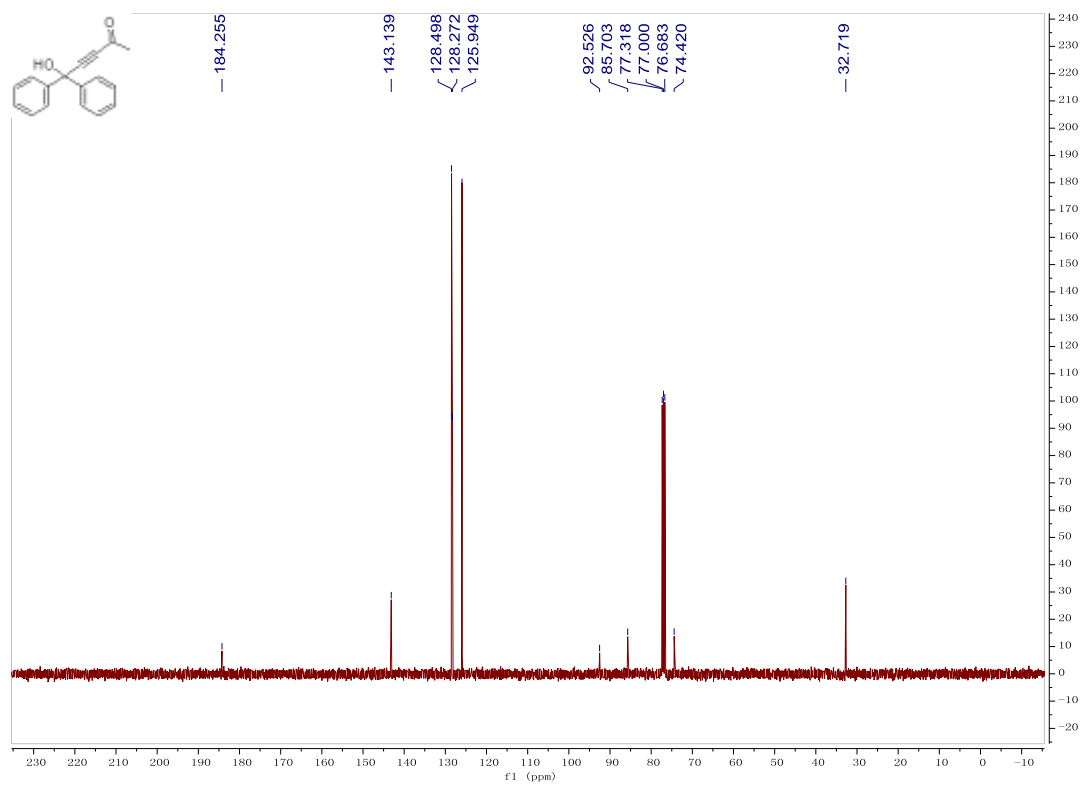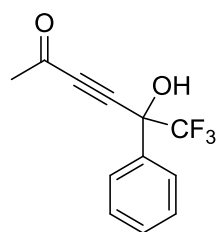

S65

Substrates **1ac** was synthesized through the **method 1**.

**6,6,6-trifluoro-5-hydroxy-5-phenylhex-3-yn-2-one (1ac)**

A white solid, 65% yield (787 mg). M.p.: 46-48 °C.  $^1\text{H}$  NMR ( $\text{CDCl}_3$ , TMS, 400 MHz)  $\delta$  2.44 (s, 3H,  $\text{CH}_3$ ), 3.49 (s, 1H, OH), 7.43-7.46 (m, 3H, ArH), 7.69-7.72 (m, 2H, ArH).  $^{13}\text{C}$  NMR ( $\text{CDCl}_3$ , TMS, 100 MHz)  $\delta$  32.6, 73.1 (q,  $J = 32.7$  Hz), 84.6, 85.1, 122.7 (q,  $J = 284.1$  Hz), 126.8 (q,  $J = 1.3$  Hz), 128.5, 130.0, 133.5, 183.3.  $^{19}\text{F}$  NMR (376 MHz,  $\text{CDCl}_3$ ,  $\text{CFCl}_3$ )  $\delta$  -79.79. IR (EtOH)  $\nu$  3330, 3057, 2913, 1712, 1678, 1611, 1356, 1234, 1198, 753  $\text{cm}^{-1}$ . HRMS (DART Positive Ion Mode) Calcd. For  $\text{C}_{12}\text{H}_{10}\text{O}_2\text{F}_3^+(\text{M}+\text{H})^+$  requires 243.0627, Found: 243.0627.

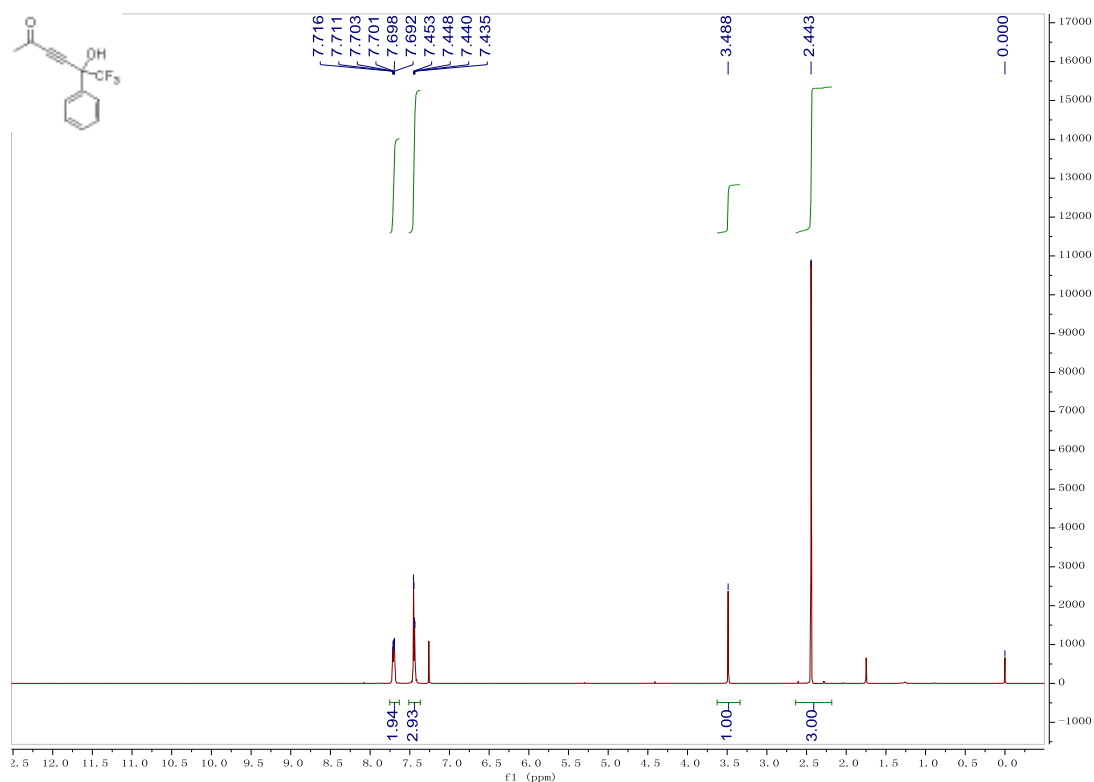

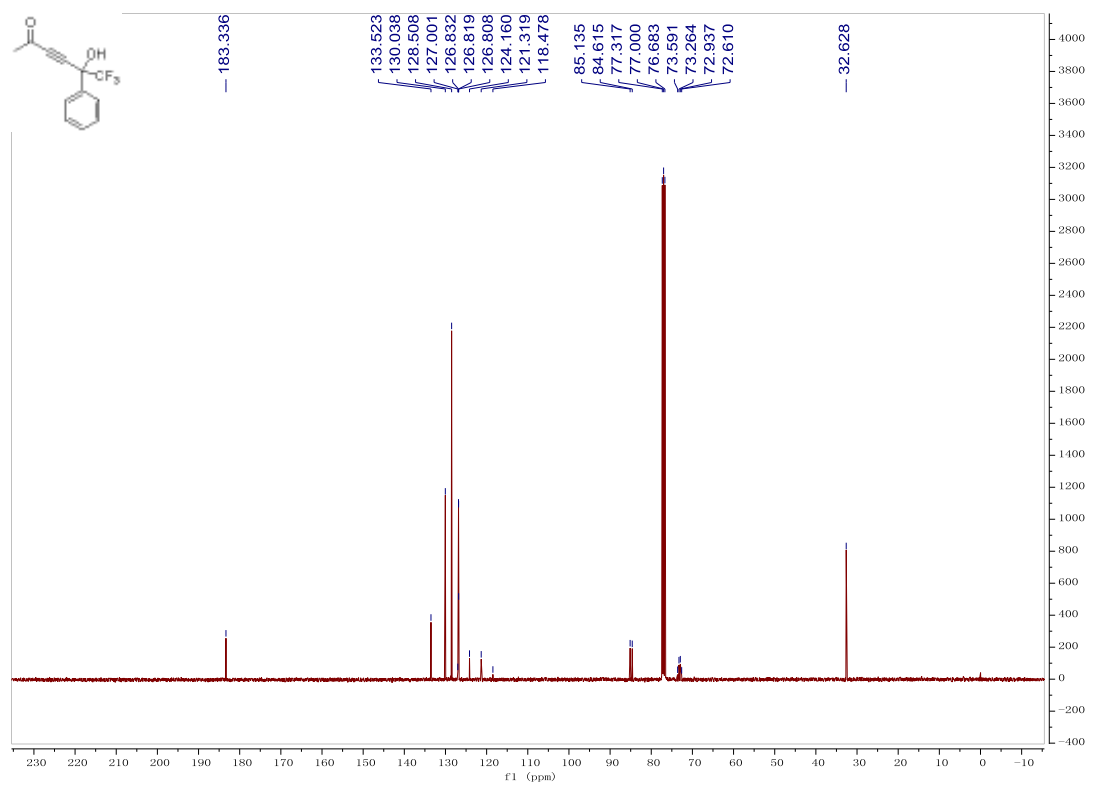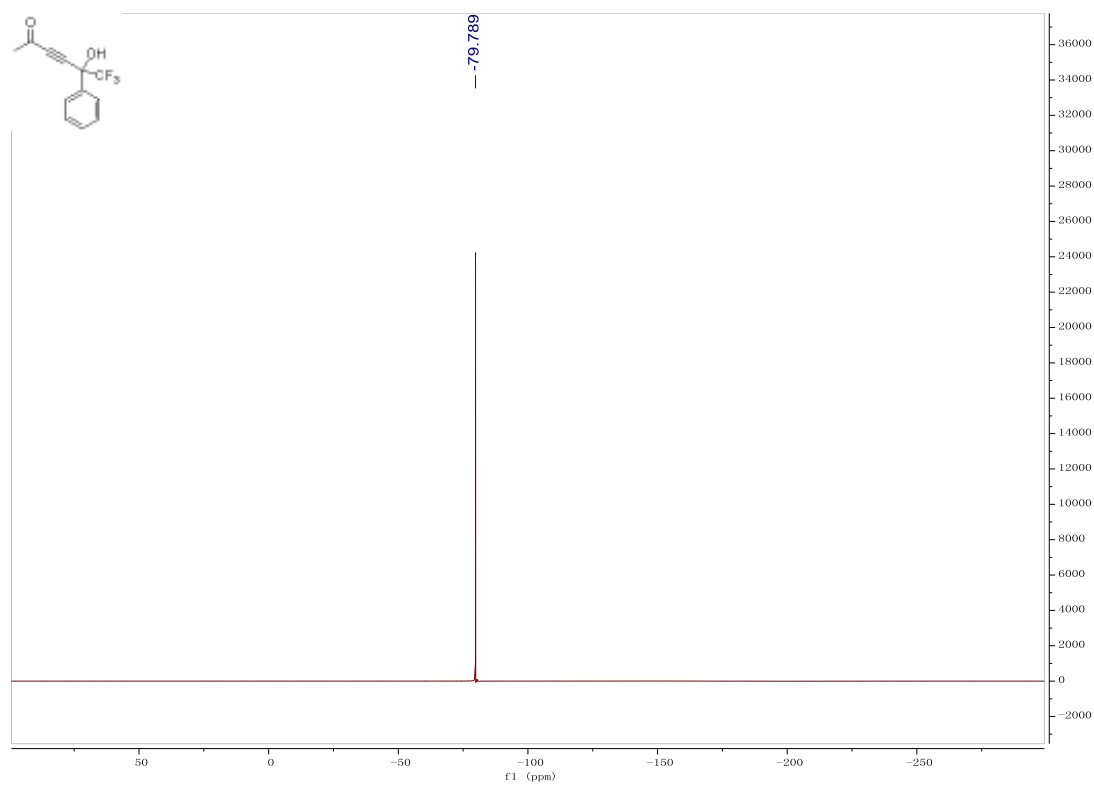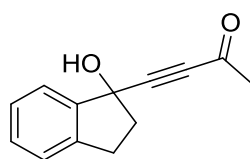

**4-(1-hydroxy-2,3-dihydro-1H-inden-1-yl)but-3-yn-2-one (1ad)**

A viscous liquid, 27% yield (270 mg).  $^1\text{H}$  NMR ( $\text{CDCl}_3$ , TMS, 400 MHz)  $\delta$  2.33 (s, 3H,  $\text{CH}_3$ ), 2.40-2.47 (m, 1H,  $\text{CH}_2$ ), 2.54-2.62 (m, 1H,  $\text{CH}_2$ ), 2.89-2.97 (m, 1H,  $\text{CH}_2$ ), 3.07-3.15 (m, 1H,  $\text{CH}_2$ ), 3.26 (s, 1H, OH), 7.24-7.33 (m, 3H, ArH), 7.46-7.49 (m, 1H, ArH).  $^{13}\text{C}$  NMR ( $\text{CDCl}_3$ , TMS, 100 MHz)  $\delta$  29.5, 32.6, 42.6, 75.9, 83.6, 92.8, 123.3, 125.1, 127.2, 129.4, 143.0, 144.0, 184.7. IR (EtOH)  $\nu$  3400, 2942, 2853, 1674, 1459, 1358, 1219, 965  $\text{cm}^{-1}$ . HRMS (ESI) Calcd. For  $\text{C}_{13}\text{H}_{16}\text{NO}_2^{+1}(\text{M}+\text{NH}_4)^+$  requires 218.1176, Found: 218.1176.

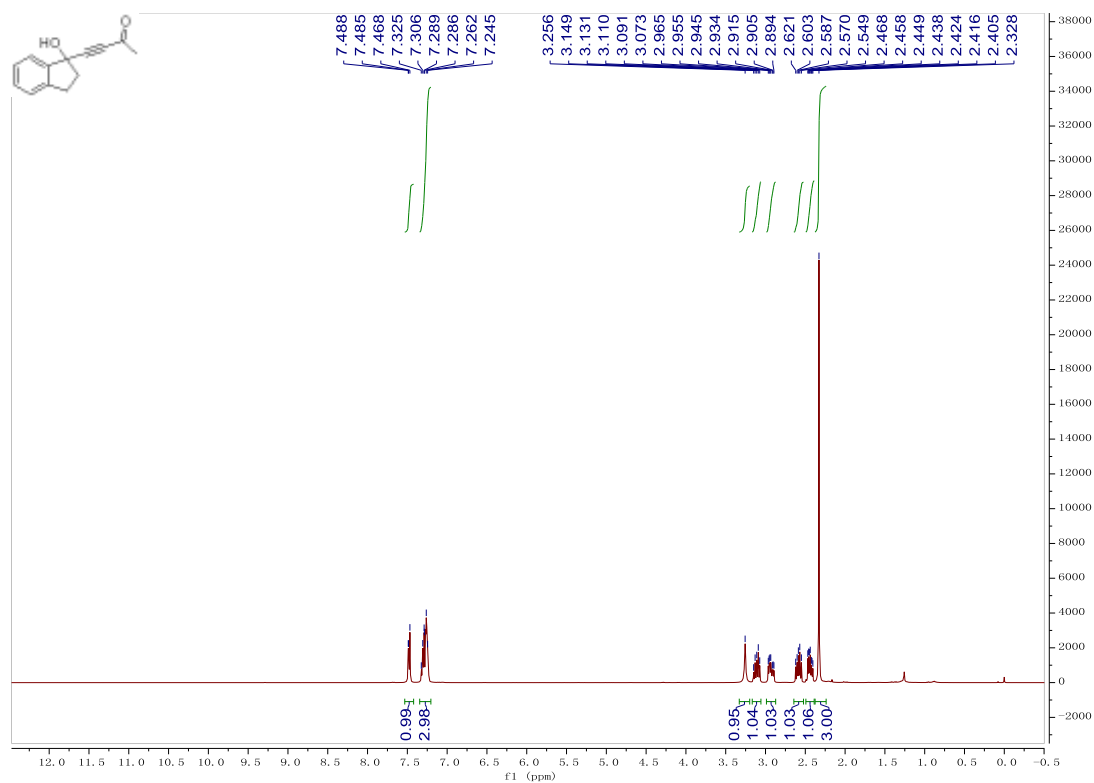

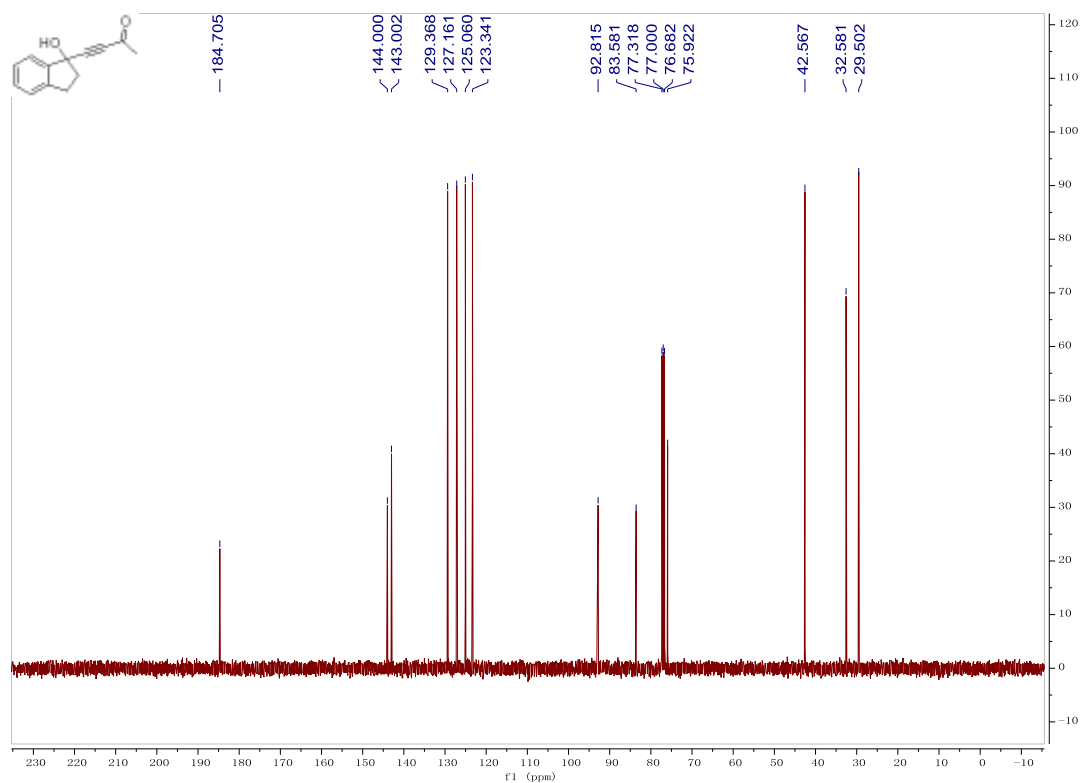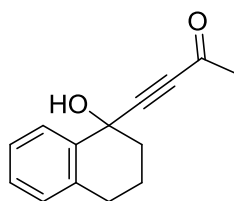

#### 4-(1-hydroxy-1,2,3,4-tetrahydronaphthalen-1-yl)but-3-yn-2-one (1ae)

A viscous liquid, 35% yield (375 mg).  $^1\text{H}$  NMR ( $\text{CDCl}_3$ , TMS, 400 MHz)  $\delta$  1.87-2.07 (m, 2H,  $\text{CH}_2$ ), 2.20-2.24 (m, 2H,  $\text{CH}_2$ ), 2.34 (s, 3H,  $\text{CH}_3$ ), 2.71-2.89 (m, 3H,  $\text{CH}_2$ , OH), 7.11 (t,  $J = 4.8$  Hz, 1H, ArH), 7.23-7.26 (m, 2H, ArH), 7.66-7.69 (m, 1H, ArH).  $^{13}\text{C}$  NMR ( $\text{CDCl}_3$ , TMS, 100 MHz)  $\delta$  18.9, 28.9, 32.6, 38.2, 67.8, 83.2, 94.7, 126.7, 127.8, 128.6, 129.3, 136.1, 137.2, 184.5. IR (EtOH)  $\nu$  3423, 2944, 1675, 1450, 1227, 1017, 772  $\text{cm}^{-1}$ . HRMS (ESI) Calcd. For  $\text{C}_{14}\text{H}_{18}\text{NO}_2$   $^{+1}(\text{M}+\text{NH}_4)^+$  requires 232.1332, Found: 232.1330.

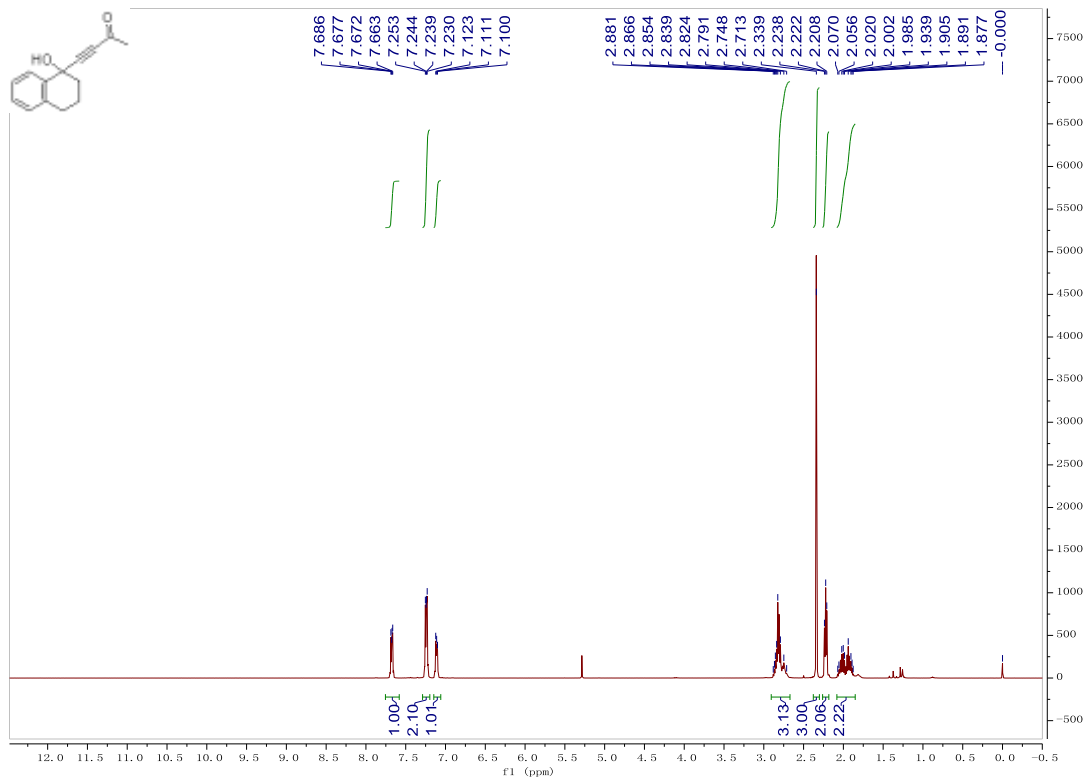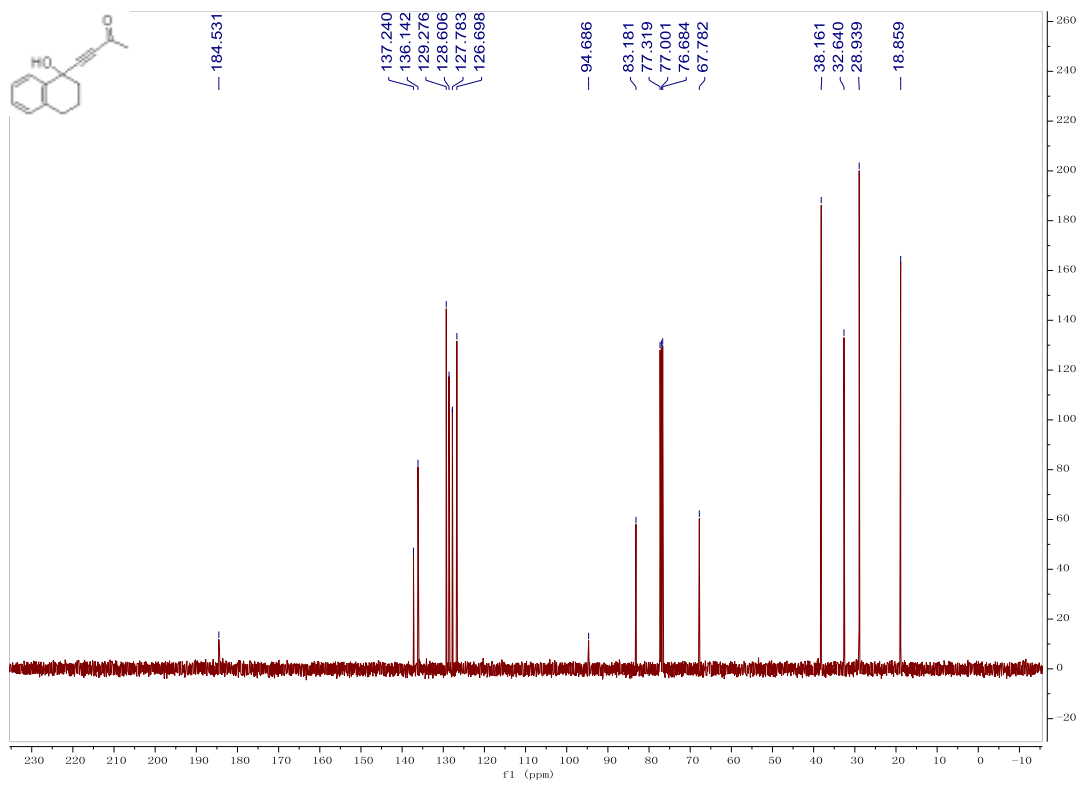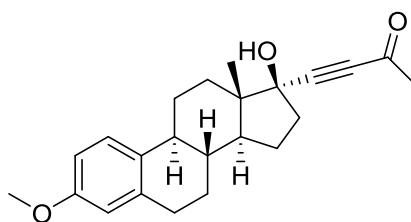

S70

**4-((8R,9S,13S,14S,17S)-17-hydroxy-3-methoxy-13-methyl-7,8,9,11,12,13,14,15,16,17-decahydro-*o*-6H-cyclopenta[*a*]phenanthren-17-yl)but-3-yn-2-one (1af)**

A viscous liquid, 73% yield (1285 mg).  $^1\text{H}$  NMR ( $\text{CDCl}_3$ , TMS, 400 MHz)  $\delta$  0.91 (s, 3H,  $\text{CH}_3$ ), 1.35-1.54 (m, 4H), 1.61-1.70 (m, 1H), 1.78-1.89 (m, 4H), 2.02-2.09 (m, 1H), 2.19-2.38 (m, 6H), 2.83-2.87 (m, 2H), 2.90 (s, 1H, OH), 3.77 (s, 3H,  $\text{CH}_3$ ), 6.63 (d,  $J = 2.8$  Hz, 1H, ArH), 6.71 (dd,  $J = 2.8, 8.4$  Hz, 1H, ArH), 7.19 (dd,  $J = 0.8, 8.8$  Hz, 1H, ArH).  $^{13}\text{C}$  NMR ( $\text{CDCl}_3$ , TMS, 100 MHz)  $\delta$  12.7, 22.8, 26.2, 27.1, 29.6, 32.7, 33.0, 38.6, 39.3, 43.3, 47.8, 49.8, 55.1, 79.8, 85.4, 95.4, 111.4, 113.7, 126.2, 132.1, 137.7, 157.3, 184.6. IR (EtOH)  $\nu$  3397, 2930, 2858, 1671, 1609, 1499, 1254, 1237, 1216, 1035  $\text{cm}^{-1}$ . HRMS (ESI) Calcd. For  $\text{C}_{23}\text{H}_{32}\text{NO}_3$  $^{+1}(\text{M}+\text{NH}_4)^+$  requires 370.2377, Found: 370.2367.

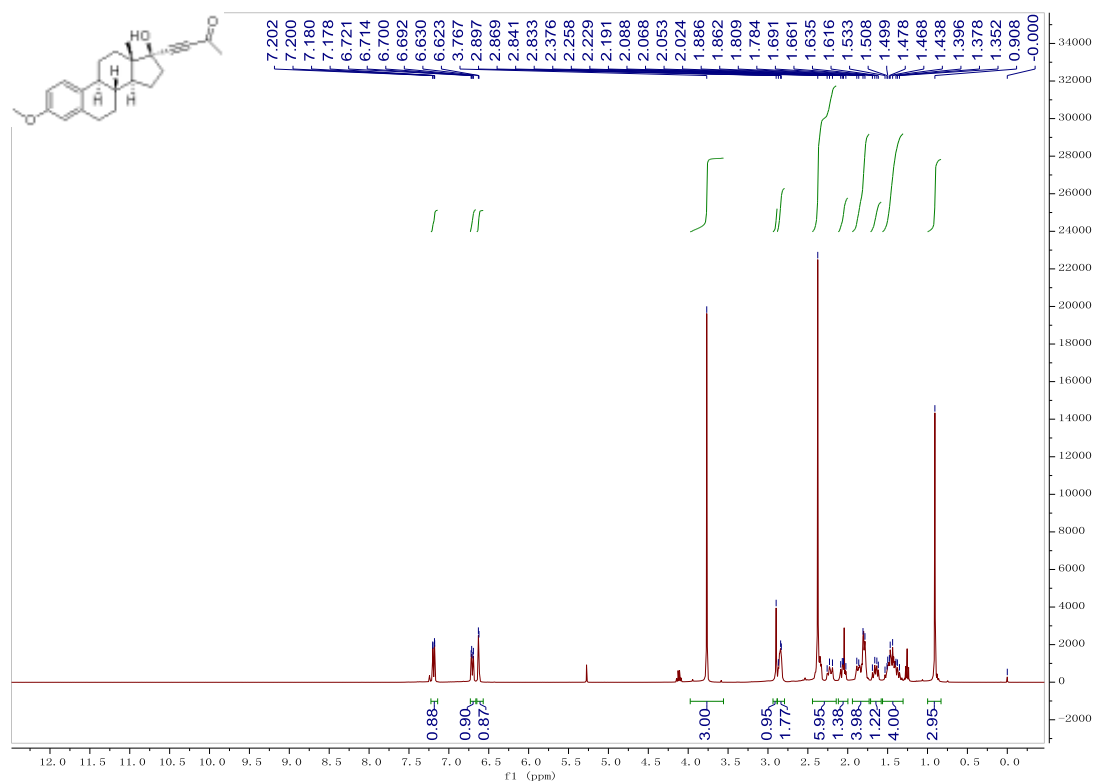

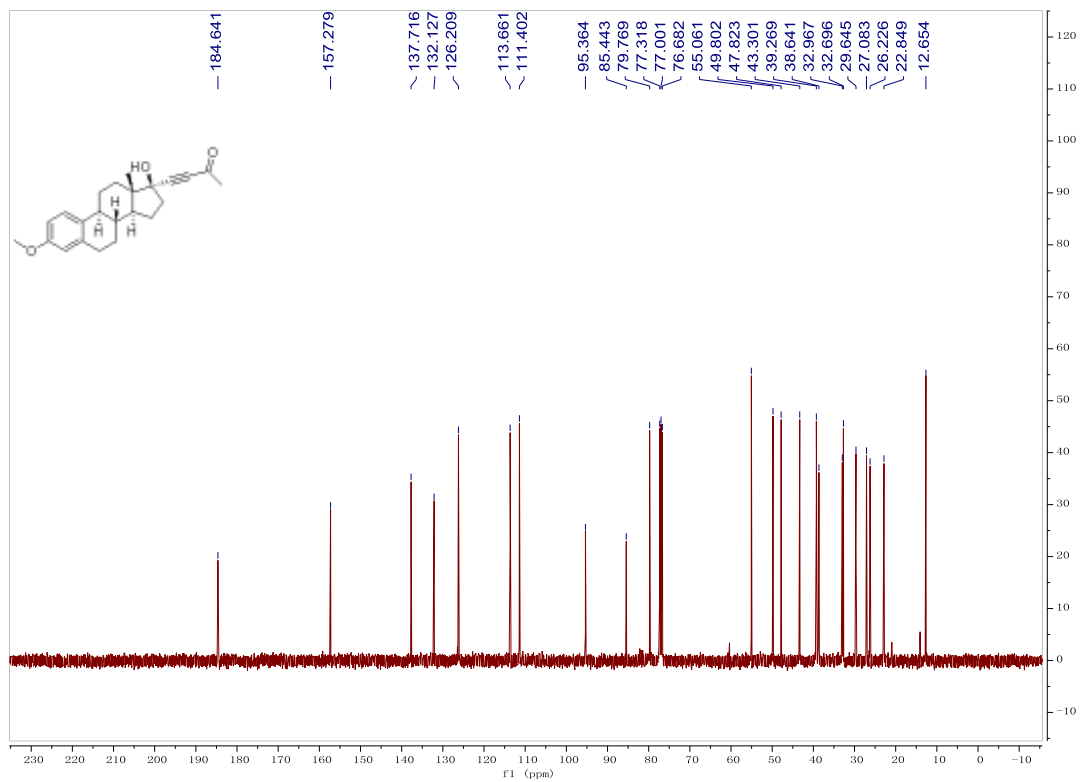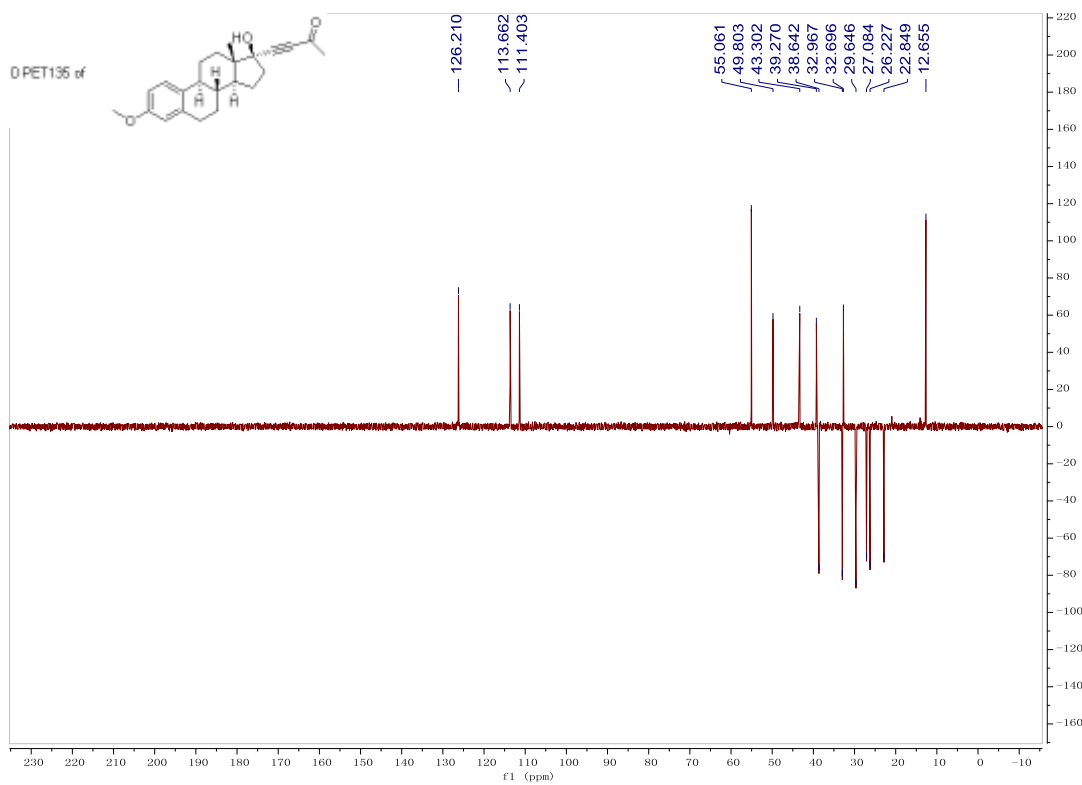



### 3. General Procedure for Carbon Dioxide Fixation of $\gamma$ -Hydroxyl Alkynone **1** and Spectroscopic Data of Carbonate **2**

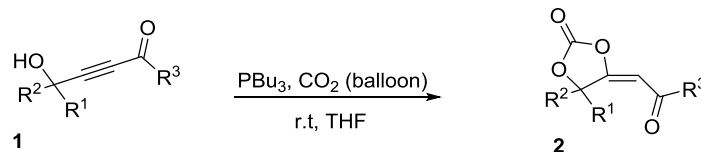

A Schlenk tube was heated under vacuum to remove ambient moisture and water, then filled with argon. After the Schlenk tube was returned to room temperature,  $\gamma$ -hydroxyl alkynone **1** (0.3 mmol) was added. Then the system was vacuumed and filled with  $\text{CO}_2$ . After repeating three times, THF (1.5 mL) was added and the reaction mixture was stirred for 10 minutes at room temperature. Then,  $\text{PBu}_3$  (13 mg, 0.06 mmol) was added to the reaction mixture at room temperature. After that, the resulting mixture was stirred at room temperature until the reaction completed upon monitoring by TLC. Then the solvent was removed under reduced pressure and the residue was directly subjected to a flash column chromatography on silica gel to afford the desired products **2a-2af**. Cyclic carbonate **2** was unstable under heating; thus, the post-treatment steps should be done below 25 °C. Even so, there were still some products that were partially decomposed.

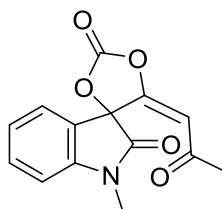

#### **(E)-1-methyl-5'-(2-oxopropylidene)spiro[indoline-3,4'-[1,3]dioxolane]-2,2'-dione (2a)**

A white solid, 81% yield (66 mg). M.p.: Decomposition above 60 °C.  $^1\text{H}$  NMR ( $\text{CDCl}_3$ , TMS, 400 MHz)  $\delta$  2.11 (s, 3H,  $\text{CH}_3$ ), 3.33 (s, 3H,  $\text{CH}_3$ ), 6.36 (s, 1H, =CH), 6.95 (d,  $J = 7.6$  Hz, 1H, ArH), 7.08 (t,  $J = 7.6$  Hz, 1H, ArH), 7.17 (d,  $J = 7.2$  Hz, 1H, ArH), 7.45 (t,  $J = 7.6$  Hz, 1H, ArH).  $^{13}\text{C}$  NMR ( $\text{CDCl}_3$ , TMS, 100 MHz)  $\delta$  26.8, 31.1, 85.8, 104.8, 108.9, 121.2, 123.5, 123.6, 132.4, 146.3, 149.4, 158.1, 166.5, 195.6. IR (EtOH)  $\nu$  3055, 2919, 2846, 1727, 1601, 1493, 1467, 1455, 1178, 1095, 935  $\text{cm}^{-1}$ . HRMS (EI) calcd. for  $\text{C}_{14}\text{H}_{11}\text{NO}_5$  requires 273.0637, Found: 273.0630.

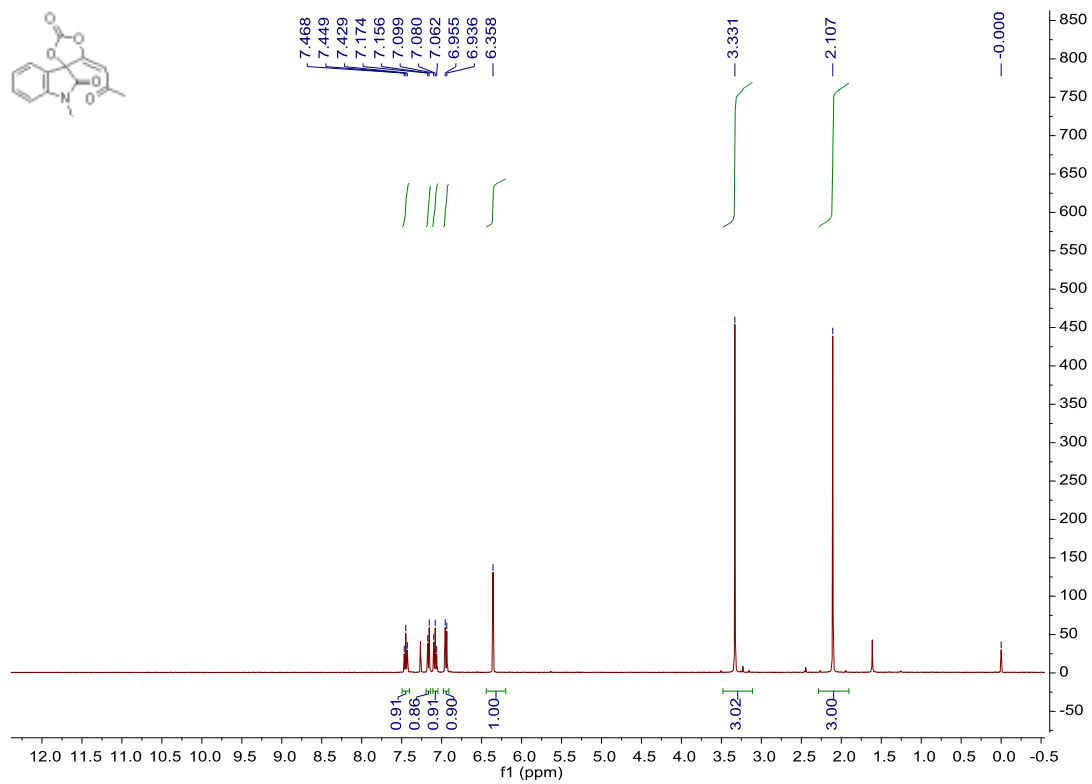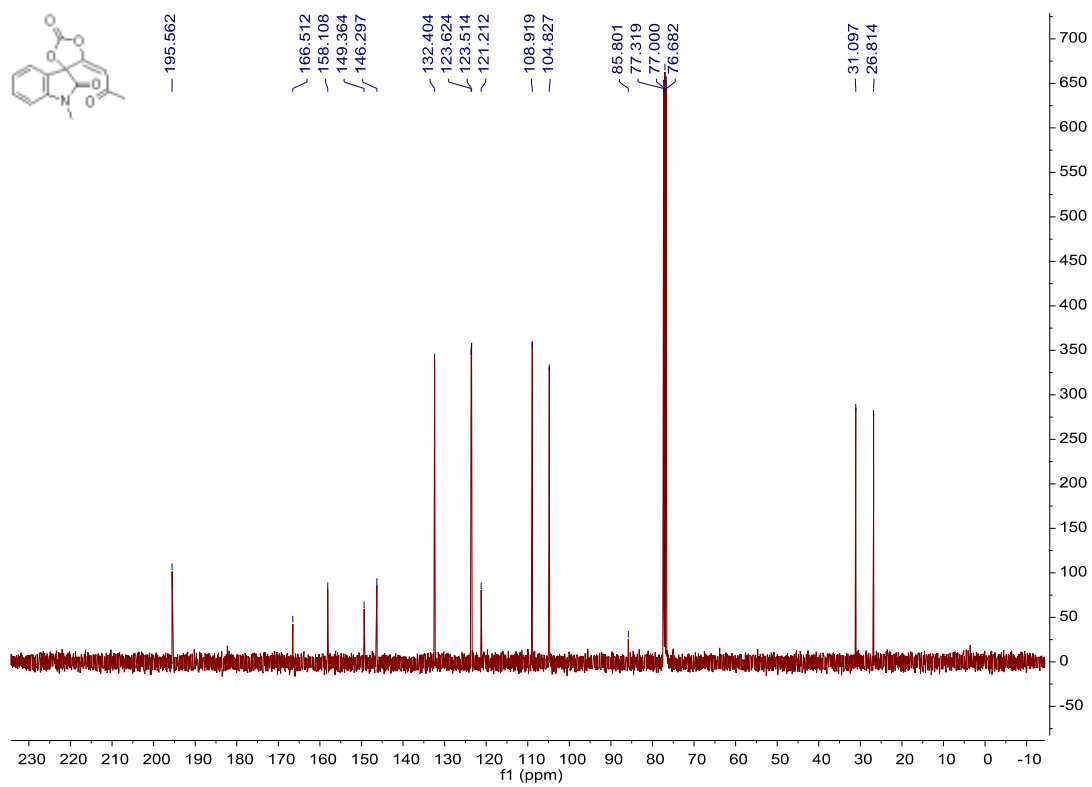

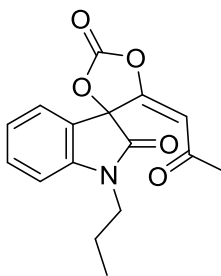

**(E)-5'-(2-oxopropylidene)-1-propylspiro[indoline-3,4'-[1,3]dioxolane]-2,2'-dione (2b)**

A white solid, 83% yield (75 mg). M.p.: Decomposition above 60 °C. <sup>1</sup>H NMR (CDCl<sub>3</sub>, TMS, 400 MHz) δ 1.03 (t, *J* = 7.2 Hz, 3H, CH<sub>3</sub>), 1.77-1.87 (m, 2H, CH<sub>2</sub>), 2.10 (s, 3H, CH<sub>3</sub>), 3.68-3.81 (m, 2H, CH<sub>2</sub>), 6.36 (s, 1H, =CH), 6.95 (d, *J* = 8.0 Hz, 1H, ArH), 7.06 (t, *J* = 7.6 Hz, 1H, ArH), 7.16 (d, *J* = 7.2 Hz, 1H, ArH), 7.43 (t, *J* = 7.6 Hz, 1H, ArH). <sup>13</sup>C NMR (CDCl<sub>3</sub>, TMS, 100 MHz) δ 11.4, 20.6, 31.1, 42.6, 85.9, 104.9, 109.2, 121.4, 123.2, 123.7, 132.3, 145.9, 149.4, 158.0, 166.4, 195.3. IR (EtOH) ν 2956, 2922, 2849, 1731, 1701, 1612, 1371, 1017, 952 cm<sup>-1</sup>. HRMS (DART Positive Ion Mode) Calcd. For C<sub>16</sub>H<sub>19</sub>O<sub>5</sub>N<sub>2</sub><sup>+1</sup>(M+NH<sub>4</sub>)<sup>+</sup> requires 319.1288, Found: 319.1290. [α]<sub>D</sub><sup>25</sup> = +25.56 (c 0.09, CH<sub>2</sub>Cl<sub>2</sub>) for 82% *ee*; Enantiomeric excess was determined by HPLC with a Chiralcel AS-H column, Hexane/<sup>i</sup>PrOH = 90/10, 0.7 mL/min, 254 nm, *t*<sub>minor</sub> = 28.637 min, *t*<sub>major</sub> = 32.635 min.

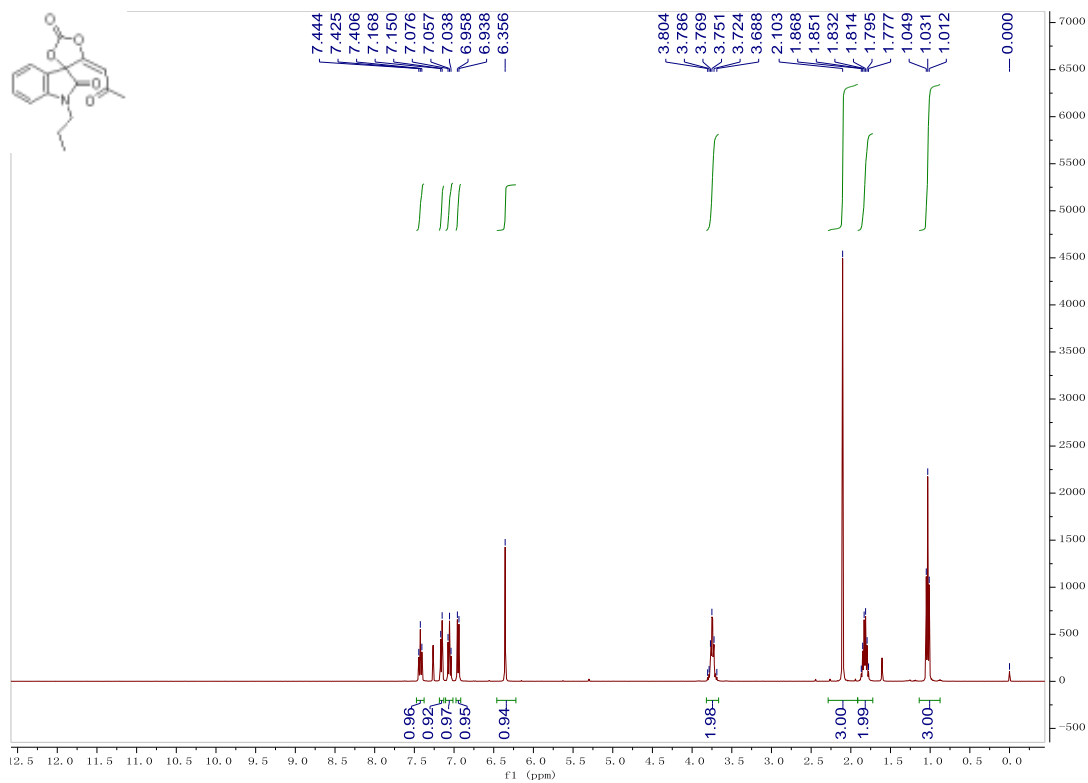

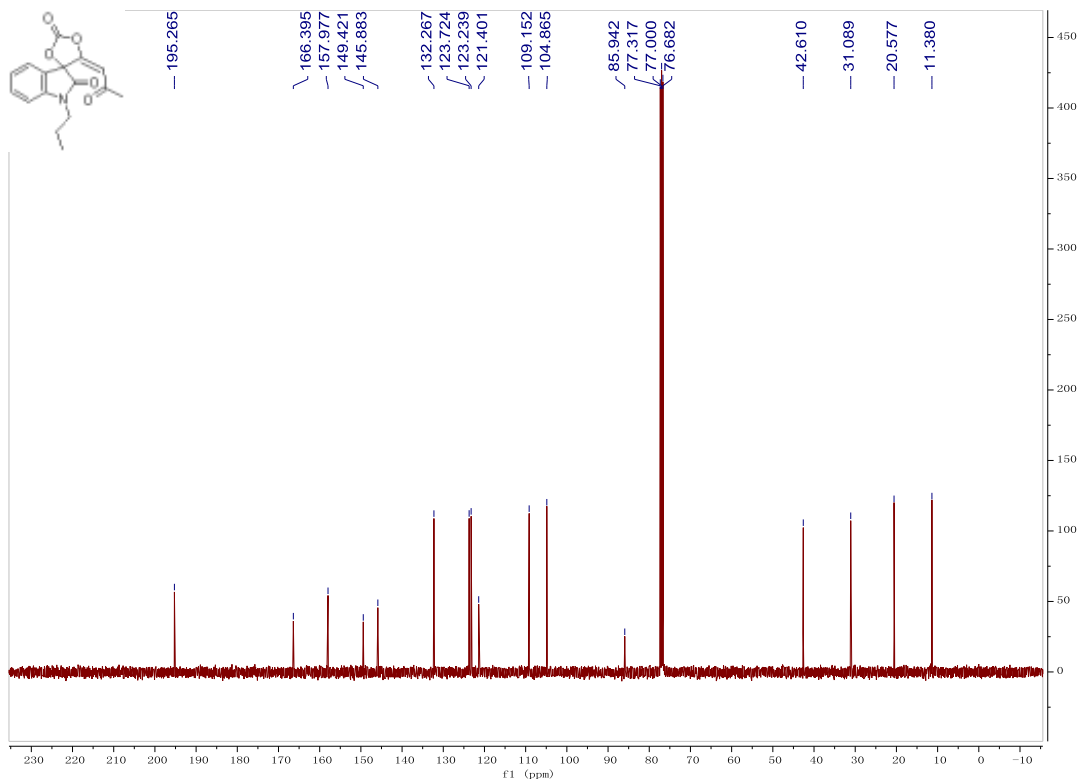

实验时间: 2018-04-27, 11:54:02  
谱图文件: D:\Sun Yaoliang\co2\18-11-a-rac.org

实验者:  
报告时间: 2018-04-27, 13:30:37  
积分方法: 面积归一法

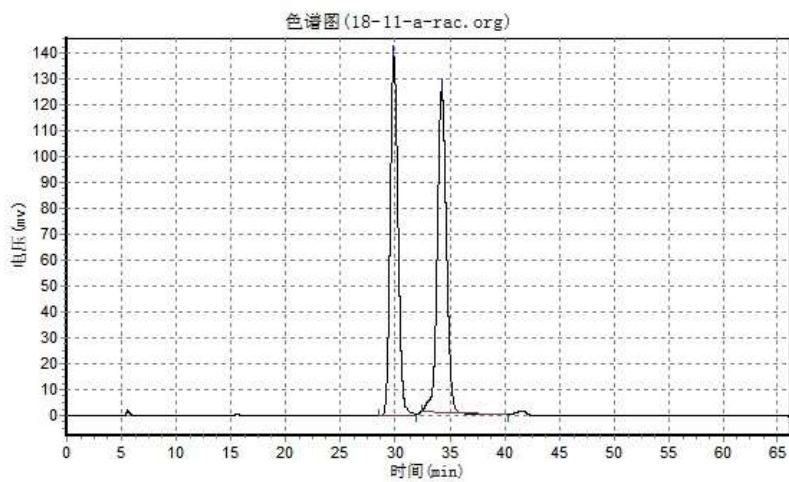

分析结果表

| 峰号 | 峰名 | 保留时间   | 峰高         | 峰面积          | 含量       |
|----|----|--------|------------|--------------|----------|
| 1  |    | 29.965 | 138873.453 | 6969775.500  | 49.1315  |
| 2  |    | 34.215 | 124730.258 | 7216182.000  | 50.8685  |
| 总计 |    |        | 263603.711 | 14185957.500 | 100.0000 |

实验时间: 2018-04-27, 13:29:03  
谱图文件: D:\Sun Yaoliang\co2\18-11-a-asy.org

实验者:  
报告时间: 2018-04-27, 13:31:56  
积分方法: 面积归一法

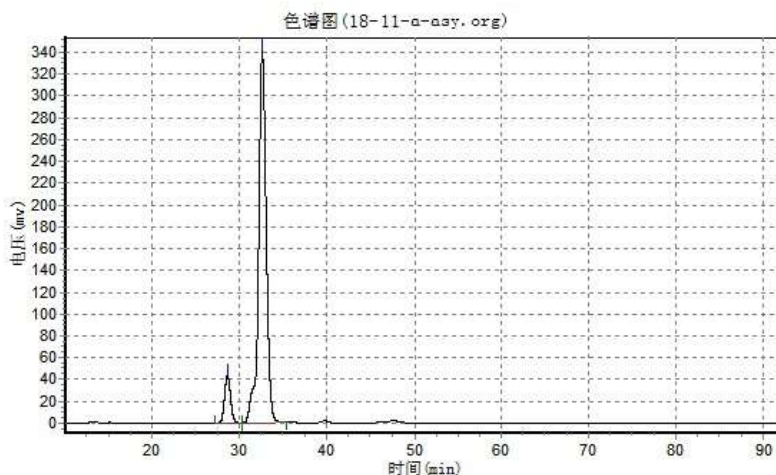

分析结果表

| 峰号 | 峰名 | 保留时间   | 峰高         | 峰面积          | 含量       |
|----|----|--------|------------|--------------|----------|
| 1  |    | 28.637 | 43624.273  | 2098988.000  | 9.1491   |
| 2  |    | 32.635 | 340081.344 | 20843054.000 | 90.8509  |
| 总计 |    |        | 383705.617 | 22942042.000 | 100.0000 |

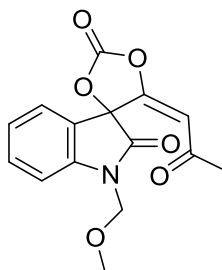

**(E)-1-(methoxymethyl)-5'-(2-oxopropylidene)spiro[indoline-3,4'-[1,3]dioxolane]-2,2'-dione**  
**(2c)**

A white solid, 81% yield (74 mg). M.p.: Decomposition above 60 °C. <sup>1</sup>H NMR (CDCl<sub>3</sub>, TMS, 400 MHz) δ 2.12 (s, 3H, CH<sub>3</sub>), 3.46 (s, 3H, CH<sub>3</sub>), 5.22 (s, 2H, CH<sub>2</sub>), 6.39 (s, 1H, =CH), 7.09-7.20 (m, 3H, ArH), 7.45 (dt, *J* = 1.2, 8.0 Hz, 1H, ArH). <sup>13</sup>C NMR (CDCl<sub>3</sub>, TMS, 100 MHz) δ 31.0, 56.9, 72.6, 86.3, 105.0, 110.4, 120.8, 123.6, 124.0, 132.5, 144.8, 149.2, 157.8, 167.0, 195.6. IR (EtOH) ν 3118, 2938, 2818, 1737, 1602, 1363, 1323, 1094, 1076, 936 cm<sup>-1</sup>. HRMS (DART Positive Ion Mode) Calcd. For C<sub>15</sub>H<sub>17</sub>O<sub>6</sub>N<sub>2</sub><sup>+1</sup>(M+NH<sub>4</sub>)<sup>+</sup> requires 321.1081, Found: 321.1081. [α]<sub>D</sub><sup>25</sup> = -27.50 (c 0.04, CH<sub>2</sub>Cl<sub>2</sub>) for 87% *ee*; Enantiomeric excess was determined by HPLC with a Chiralcel AD-H column, Hexane/<sup>i</sup>PrOH = 90/10, 0.7 mL/min, 254 nm, *t*<sub>minor</sub> = 30.688 min, *t*<sub>major</sub> = 27.038 min.

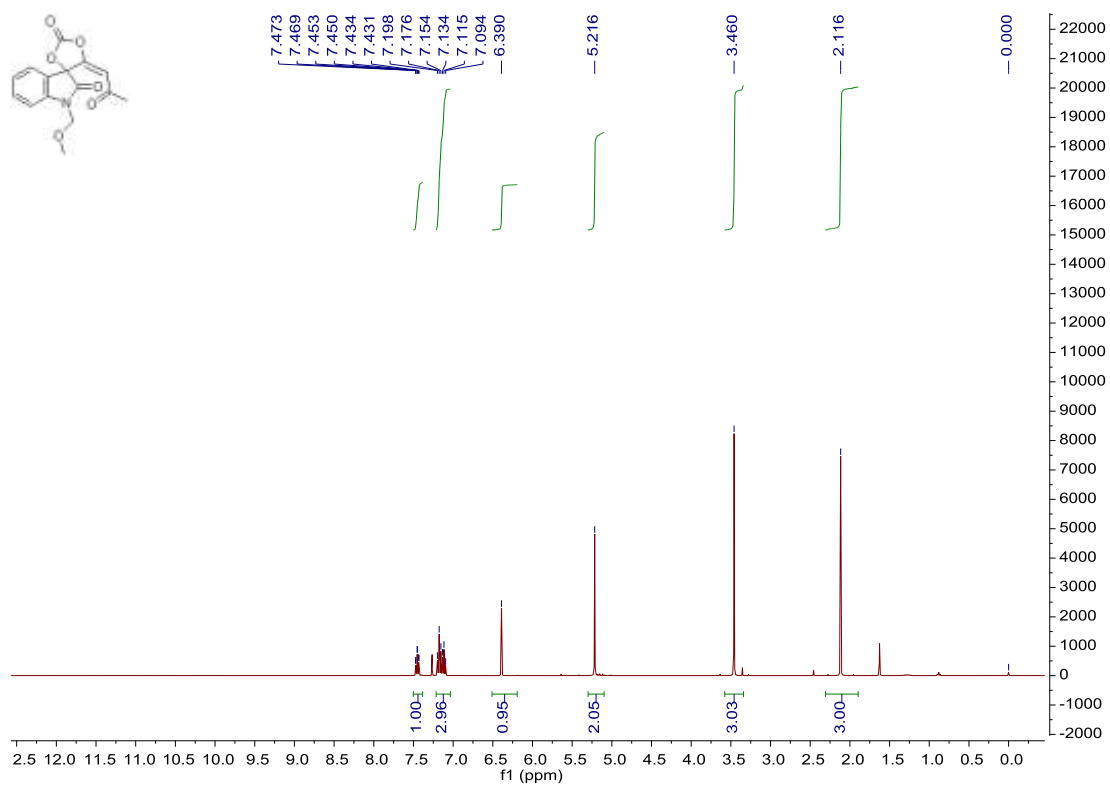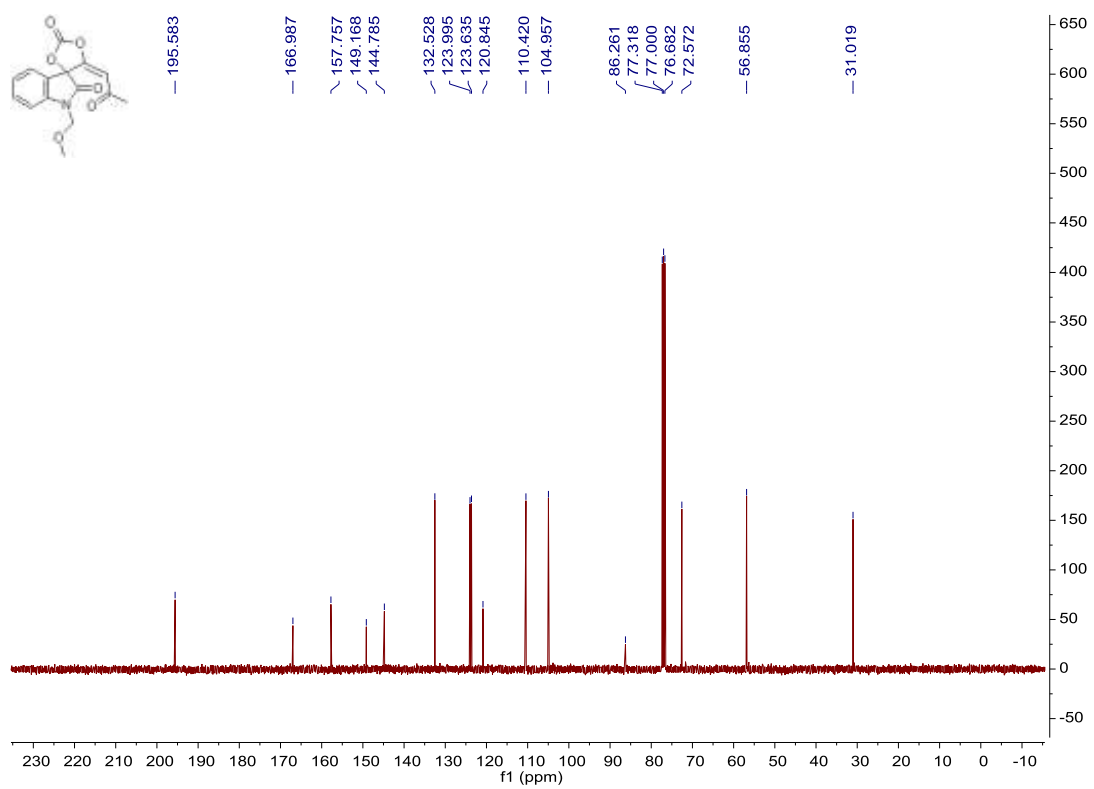

实验时间: 2018-04-25, 10:53:26  
谱图文件: D:\Sun Yaoliang\co2\18-8-a-rac.org

实验者:  
报告时间: 2018-04-25, 11:30:18  
积分方法: 面积归一法

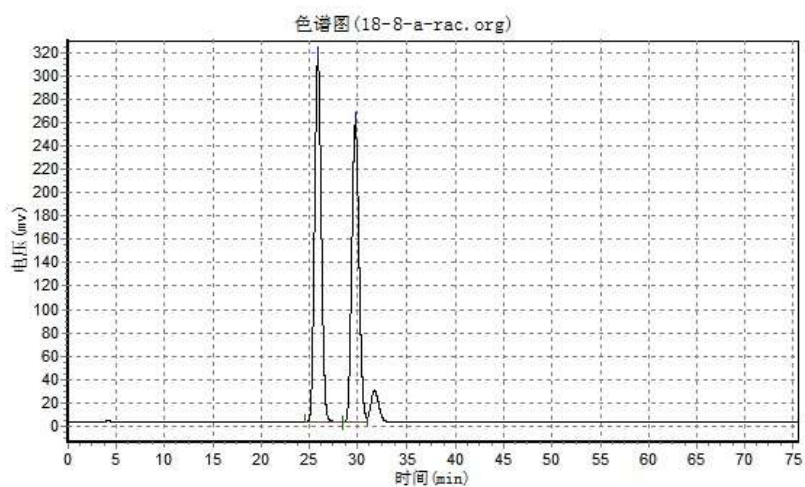

分析结果表

| 峰号 | 峰名 | 保留时间   | 峰高         | 峰面积          | 含量       |
|----|----|--------|------------|--------------|----------|
| 1  |    | 25.863 | 310320.094 | 15092356.000 | 52.8409  |
| 2  |    | 29.745 | 255446.313 | 13469511.000 | 47.1591  |
| 总计 |    |        | 565766.406 | 28561867.000 | 100.0000 |

实验时间: 2018-04-25, 13:27:47  
谱图文件: D:\Sun Yaoliang\co2\18-8-a-asy.org

实验者:  
报告时间: 2018-04-25, 13:28:32  
积分方法: 面积归一法

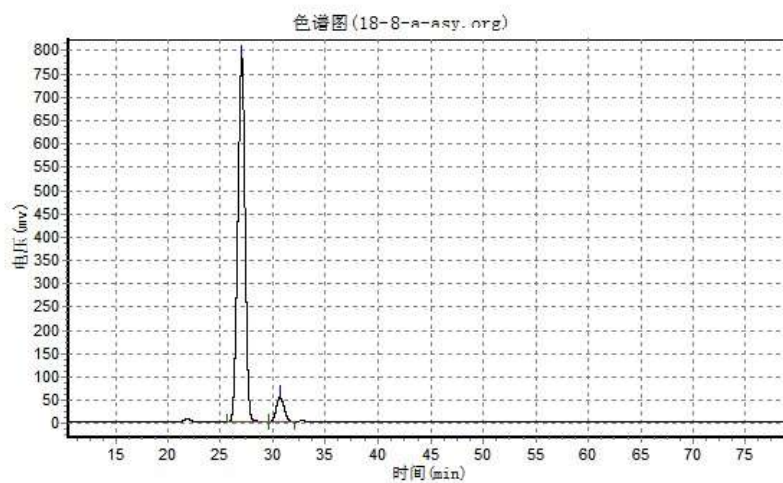

分析结果表

| 峰号 | 峰名 | 保留时间   | 峰高         | 峰面积          | 含量       |
|----|----|--------|------------|--------------|----------|
| 1  |    | 27.038 | 782688.250 | 37789640.000 | 93.3193  |
| 2  |    | 30.688 | 51378.430  | 2705337.250  | 6.6807   |
| 总计 |    |        | 834066.680 | 40494977.250 | 100.0000 |

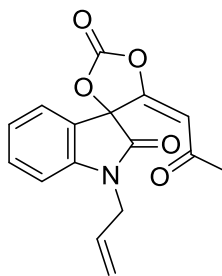

**(E)-1-allyl-5'-(2-oxopropylidene)spiro[indoline-3,4'-[1,3]dioxolane]-2,2'-dione (2d)**

A white solid, 85% yield (76 mg). M.p.: Decomposition above 60 °C.  $^1\text{H}$  NMR ( $\text{CDCl}_3$ , TMS, 400 MHz)  $\delta$  2.11 (s, 3H,  $\text{CH}_3$ ), 4.44 (d,  $J = 4.8$  Hz, 2H,  $\text{CH}_2$ ), 5.32 (d,  $J = 10.4$  Hz, 1H,  $=\text{CH}_2$ ), 5.46 (d,  $J = 17.2$  Hz, 1H,  $=\text{CH}_2$ ), 5.90-6.00 (m, 1H,  $=\text{CH}$ ), 6.37 (s, 1H,  $=\text{CH}$ ), 6.95 (d,  $J = 8.0$  Hz, 1H, ArH), 7.07 (t,  $J = 7.6$  Hz, 1H, ArH), 7.37 (d,  $J = 7.2$  Hz, 1H, ArH), 7.41 (t,  $J = 7.6$  Hz, 1H, ArH).  $^{13}\text{C}$  NMR ( $\text{CDCl}_3$ , TMS, 100 MHz)  $\delta$  31.1, 43.4, 85.9, 104.9, 109.9, 118.5, 121.3, 123.5, 123.6, 130.8, 132.2, 145.6, 149.3, 157.9, 166.2, 195.4. IR (EtOH)  $\nu$  3097, 3024, 2831, 1850, 1728, 1603, 1430, 1330, 1200, 963, 741  $\text{cm}^{-1}$ . HRMS (DART Positive Ion Mode) Calcd. For  $\text{C}_{16}\text{H}_{17}\text{O}_5\text{N}_2^+ (\text{M}+\text{NH}_4)^+$  requires 317.1132, Found: 317.1133.  $[\alpha]_D^{25} = +149.17$  (c 0.04,  $\text{CH}_2\text{Cl}_2$ ) for 79% *ee*; Enantiomeric excess was determined by HPLC with a Chiralcel AD-H column, Hexane/*i*PrOH = 90/10, 0.7 mL/min, 254 nm,  $t_{\text{minor}} = 29.802$  min,  $t_{\text{major}} = 26.885$  min.

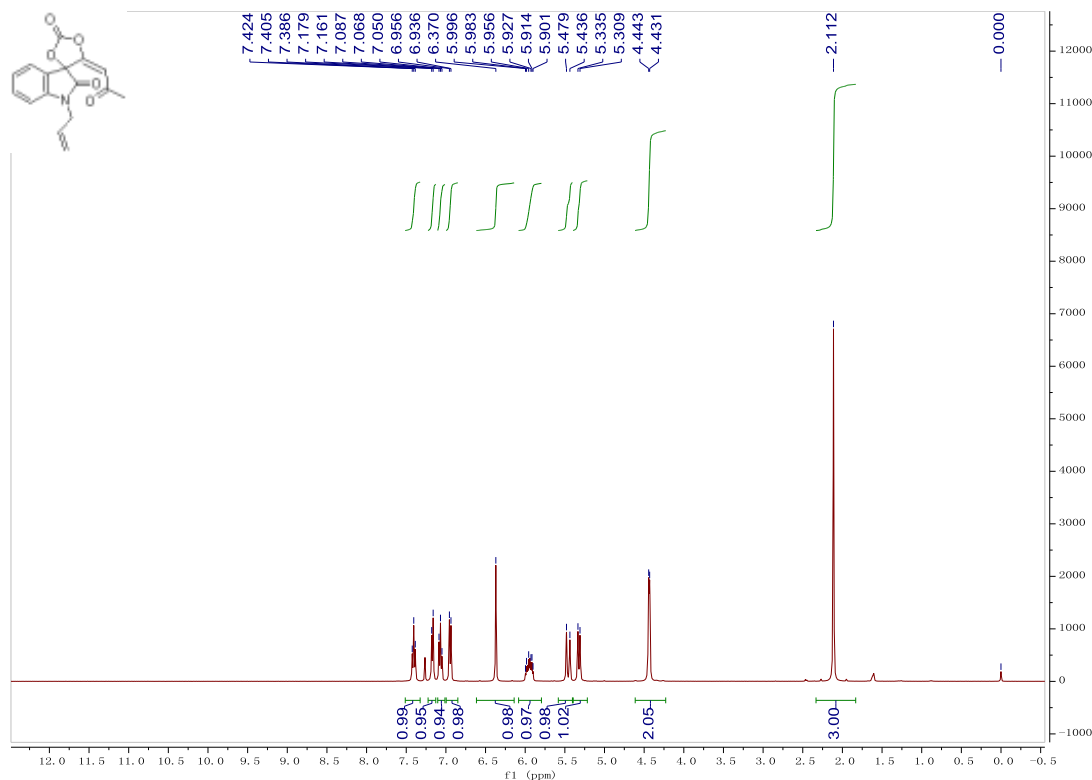



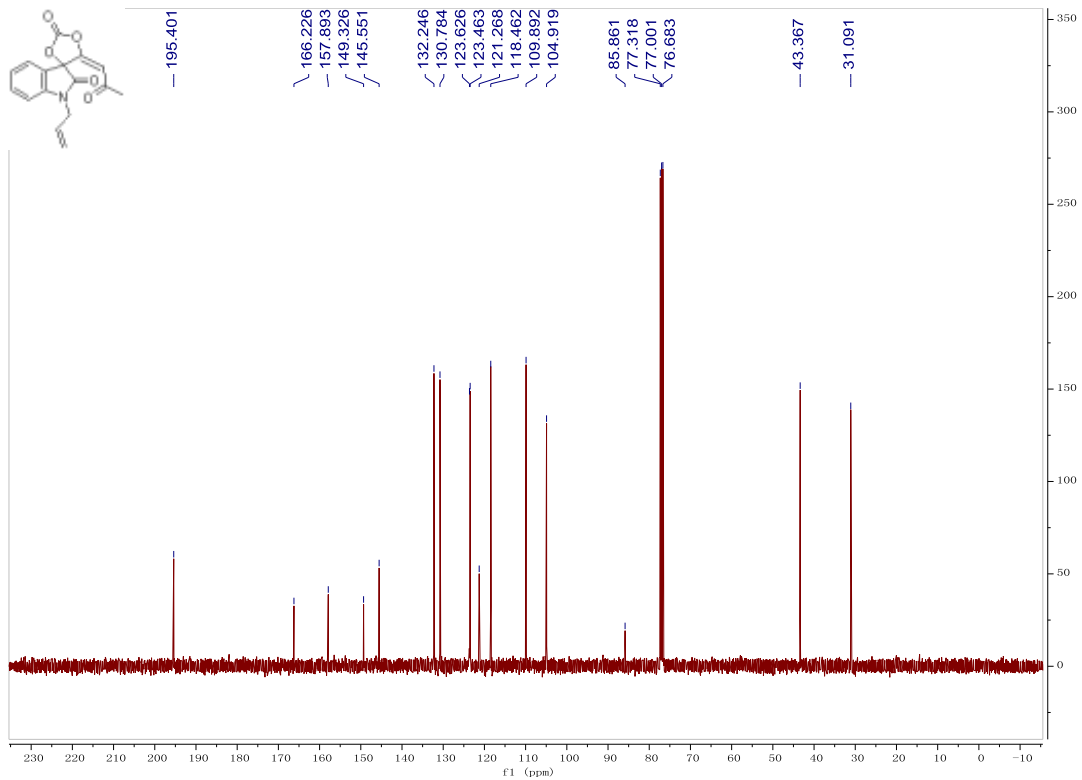

实验时间: 2018-04-24, 11:00:15  
谱图文件: D:\Sun Yaojiang\02\18-6-a-rac.org

谱图名称: 18-6-a-rac.org  
实验时间: 2018-04-24, 11:34:07  
分析方法: 凝胶柱一法

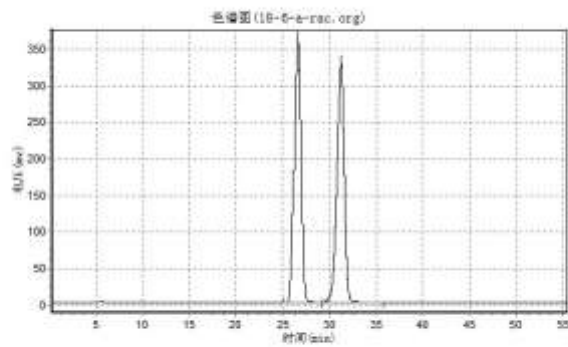

分析结果表

| 峰号 | 峰名 | 保留时间   | 峰高         | 峰面积          | 含量       |
|----|----|--------|------------|--------------|----------|
| 1  |    | 26.590 | 308362.531 | 17363018.000 | 49.0268  |
| 2  |    | 31.223 | 327104.063 | 18073870.000 | 50.9742  |
| 总计 |    |        | 635466.594 | 35436888.000 | 100.0000 |

实验时间: 2018-04-24, 11:47:45  
谱图文件: D:\San\_Tao\lang\002\18-04-24-11-48-33

实验者:  
报告时间: 2018-04-24, 11:48:33  
积分方法: 面积归一法

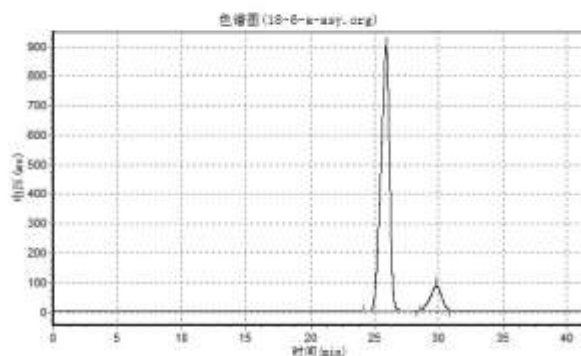

| 分析结果表 |    |        |            |              |          |
|-------|----|--------|------------|--------------|----------|
| 峰号    | 峰名 | 保留时间   | 峰高         | 峰面积          | 含量       |
| 1     |    | 25.888 | 899472.563 | 42021936.000 | 89.3566  |
| 2     |    | 29.802 | 81741.734  | 5005308.500  | 10.6434  |
| 总计    |    |        | 981214.297 | 47027244.500 | 100.0000 |

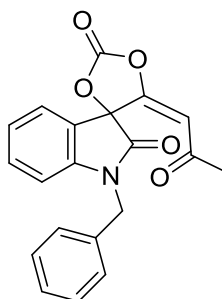

**(E)-1-benzyl-5'-(2-oxopropylidene)spiro[indoline-3,4'-[1,3]dioxolane]-2,2'-dione (2e)**

A white solid, 79% yield (83 mg). M.p.: Decomposition above 60 °C. <sup>1</sup>H NMR (CDCl<sub>3</sub>, TMS, 400 MHz) δ 2.14 (s, 3H, CH<sub>3</sub>), 4.85 (d, *J* = 16.0 Hz, 1H, CH<sub>2</sub>), 5.19 (d, *J* = 16.0 Hz, 1H, CH<sub>2</sub>), 6.40 (s, 1H, =CH), 6.77 (d, *J* = 7.6 Hz, 1H, ArH), 7.04 (t, *J* = 7.6 Hz, 1H, ArH), 7.17 (d, *J* = 7.2 Hz, 1H, ArH), 7.28-7.43 (m, 6H, ArH). <sup>13</sup>C NMR (CDCl<sub>3</sub>, TMS, 100 MHz) δ 31.1, 44.8, 86.0, 105.0, 110.0, 110.1, 121.4, 123.6, 127.3, 127.9, 128.9, 132.3, 134.6, 145.5, 149.3, 158.0, 166.8, 195.5. IR (EtOH) ν 3060, 2924, 2853, 1732, 1704, 1605, 1489, 1361, 1323, 1255, 1164, 750 cm<sup>-1</sup>. HRMS (EI) calcd. for C<sub>20</sub>H<sub>15</sub>NO<sub>5</sub> requires 349.0950, Found: 349.0946. [α]<sub>D</sub><sup>25</sup> = +57.50 (c 0.04, CH<sub>2</sub>Cl<sub>2</sub>) for 81% *ee*; Enantiomeric excess was determined by HPLC with a Chiralcel AD-H column, Hexane/<sup>*i*</sup>PrOH = 90/10, 0.7 mL/min, 254 nm, *t*<sub>minor</sub> = 43.161 min, *t*<sub>major</sub> = 30.346 min.

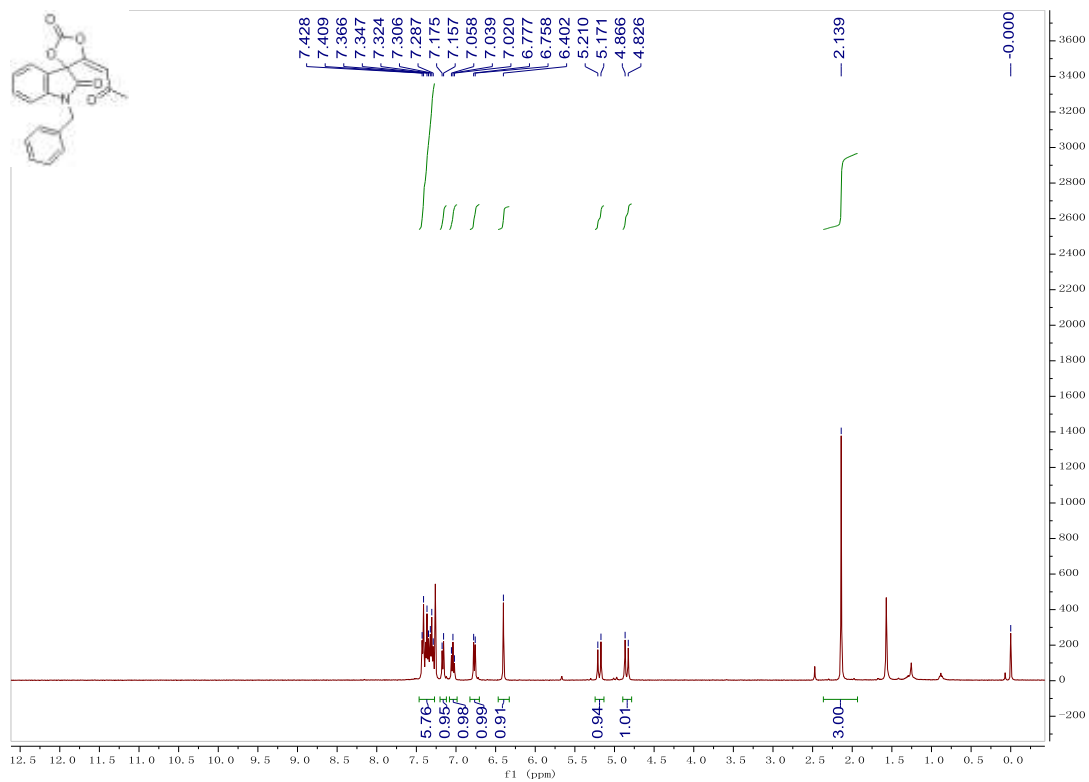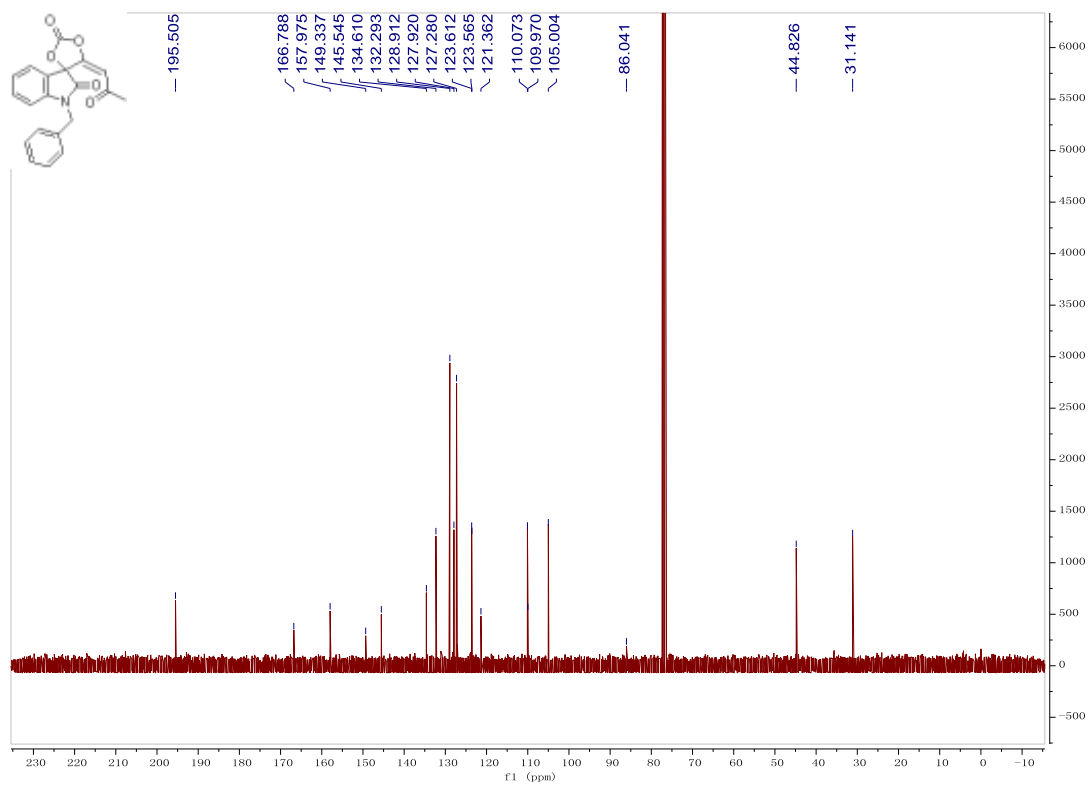

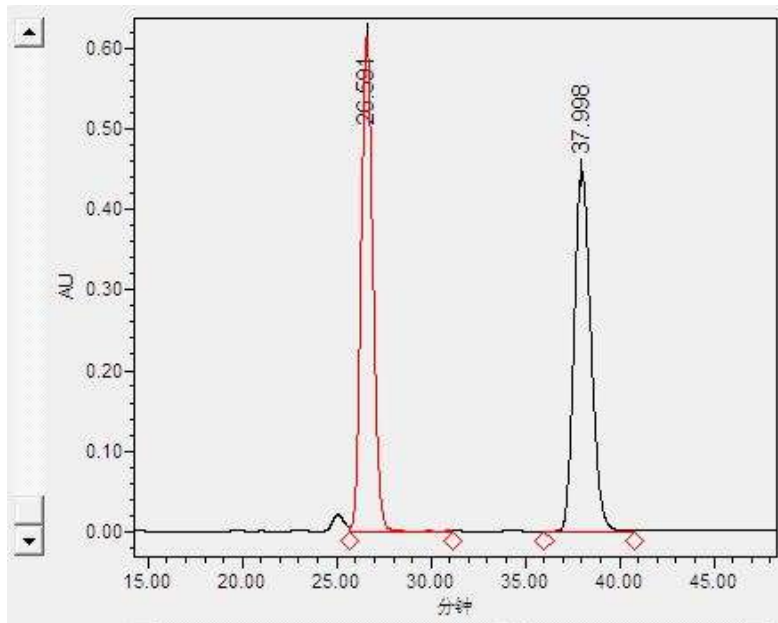

| 名称 | 保留时间 (分钟) | 面积 (微伏秒) | % 面积  | 高度 (微伏) | 积分类型 | 含量 | 单位 | 峰类型 |
|----|-----------|----------|-------|---------|------|----|----|-----|
| 1  | 26.591    | 26924124 | 49.15 | 613128  | Vv   |    |    | 未知  |
| 2  | 37.998    | 27854077 | 50.85 | 446829  | VV   |    |    | 未知  |
|    |           |          |       |         |      |    |    |     |
|    |           |          |       |         |      |    |    |     |
|    |           |          |       |         |      |    |    |     |
|    |           |          |       |         |      |    |    |     |

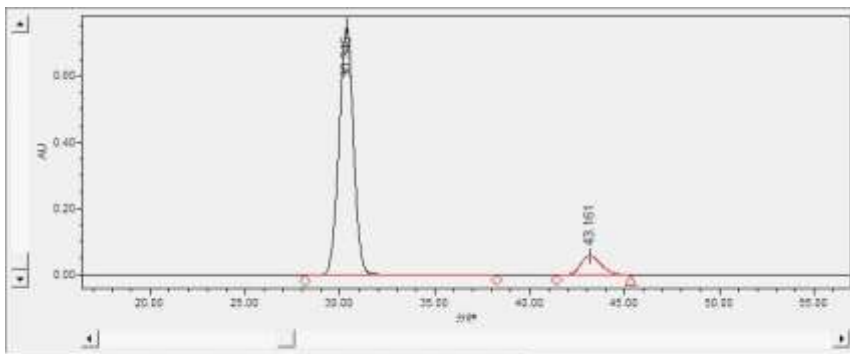

| 名称 | 保留时间 (分钟) | 面积 (微伏秒) | % 面积  | 高度 (微伏) | 积分类型 | 含量 | 单位 | 峰类型 | 峰代码 |
|----|-----------|----------|-------|---------|------|----|----|-----|-----|
| 1  | 38.348    | 46133459 | 90.42 | 751213  | VV   |    |    | 未知  |     |
| 2  | 43.161    | 4250529  | 8.58  | 57848   | VV   |    |    | 未知  |     |
|    |           |          |       |         |      |    |    |     |     |
|    |           |          |       |         |      |    |    |     |     |
|    |           |          |       |         |      |    |    |     |     |

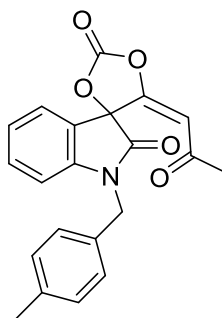

**(E)-1-(4-methylbenzyl)-5'-(2-oxopropylidene)spiro[indoline-3,4'-[1,3]dioxolane]-2,2'-dione (2f)**

A white solid, 84% yield (91 mg). M.p.: Decomposition above 60 °C.  $^1\text{H}$  NMR ( $\text{CDCl}_3$ , TMS, 400 MHz)  $\delta$  2.12 (s, 3H,  $\text{CH}_3$ ), 2.33 (s, 3H,  $\text{CH}_3$ ), 4.81 (d,  $J = 15.6$  Hz, 1H,  $\text{CH}_2$ ), 5.13 (d,  $J = 15.6$  Hz, 1H,  $\text{CH}_2$ ), 6.39 (s, 1H, =CH), 6.77 (d,  $J = 7.6$  Hz, 1H, ArH), 7.02 (t,  $J = 7.6$  Hz, 1H, ArH), 7.14-7.17 (m, 3H, ArH), 7.25-7.31 (m, 3H, ArH).  $^{13}\text{C}$  NMR ( $\text{CDCl}_3$ , TMS, 100 MHz)  $\delta$  21.1, 31.1, 44.6, 86.0, 105.0, 110.1, 121.3, 123.5, 127.3, 129.5, 131.5, 132.2, 137.6, 145.5, 149.3, 157.9, 166.7, 195.4. IR (EtOH)  $\nu$  3060, 2922, 2854, 1731, 1704, 1607, 1466, 1360, 1261, 1032, 990  $\text{cm}^{-1}$ . HRMS (DART Positive Ion Mode) Calcd. For  $\text{C}_{21}\text{H}_{21}\text{O}_5\text{N}_2^{+1}(\text{M}+\text{NH}_4)^+$  requires 381.1445, Found: 381.1445.  $[\alpha]_{\text{D}}^{25} = +59.17$  (c 0.04,  $\text{CH}_2\text{Cl}_2$ ) for 85% *ee*; Enantiomeric excess was determined by HPLC with a Chiralcel AD-H column, Hexane/*i*PrOH = 90/10, 0.7 mL/min, 254 nm,  $t_{\text{minor}} = 38.282$  min,  $t_{\text{major}} = 26.820$  min.

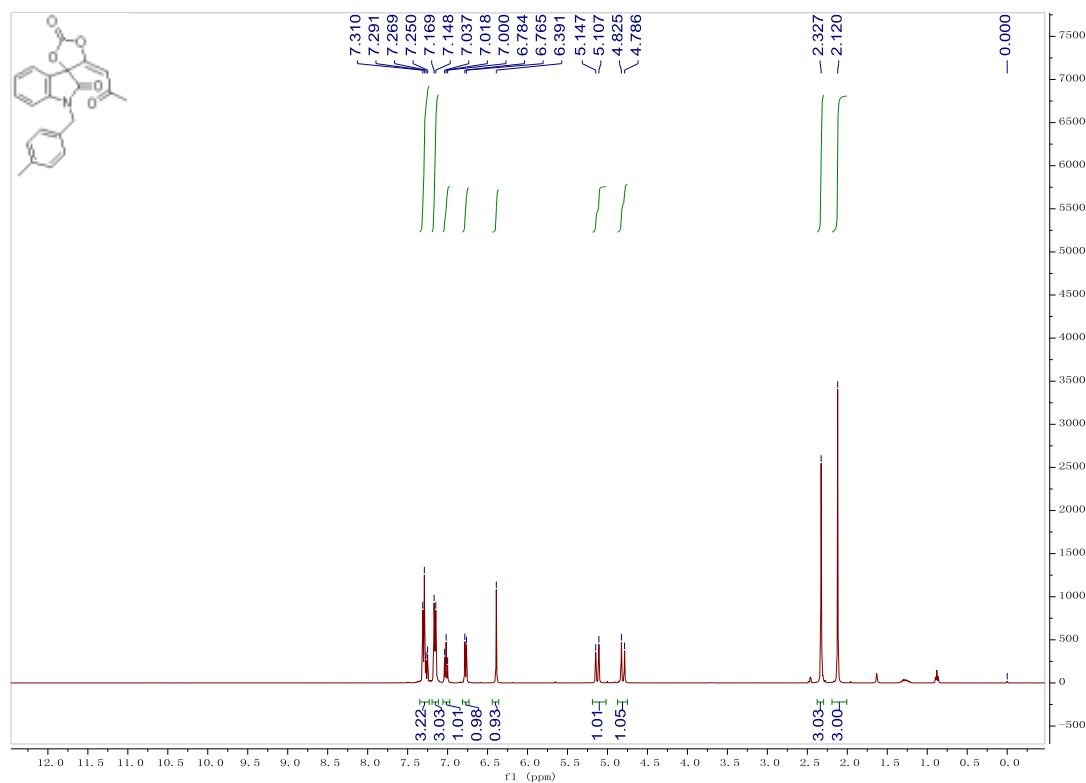

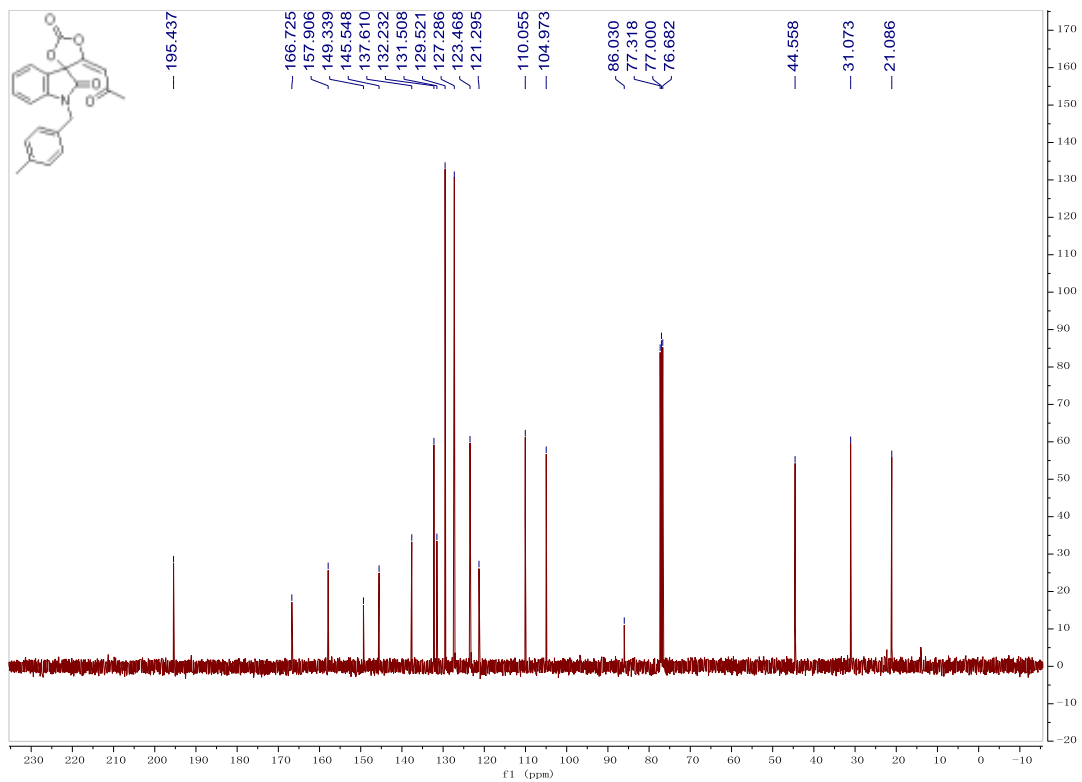

实验时间: 2018-04-20, 17:08:35  
谱图文件: D:\Sun Yaoliang\ico\18-1-w-rac.org

实验者:  
报告时间: 2018-04-21, 18:29:14  
积分方法: 面积归一法

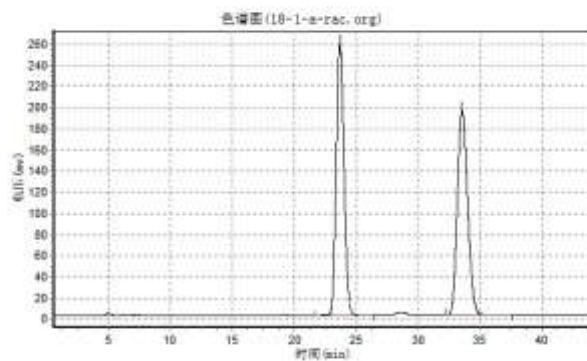

分析结果表

| 峰号 | 峰名 | 保留时间   | 峰高         | 峰面积          | 含量       |
|----|----|--------|------------|--------------|----------|
| 1  |    | 23.663 | 256416.628 | 11274702.000 | 50.1300  |
| 2  |    | 33.545 | 193028.578 | 11216246.000 | 49.8700  |
| 总计 |    |        | 449444.406 | 22490948.000 | 100.0000 |

实验时间: 2018-04-20, 11:53:39  
谱图文件: D:\Sun Yanliang\oe\18-1-a\exp.org

实验号:  
报告时间: 2018-04-20, 11:54:28  
积分方法: 面积归一法

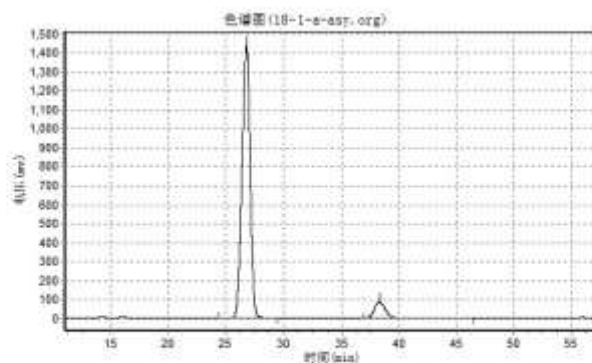

| 分析结果表 |    |        |             |          |
|-------|----|--------|-------------|----------|
| 峰号    | 峰名 | 保留时间   | 峰高          | 含量       |
| 1     |    | 26.820 | 1436635.875 | 92.5523  |
| 2     |    | 38.282 | 84304.828   | 7.4477   |
| 总计    |    |        | 1520940.703 | 100.0000 |

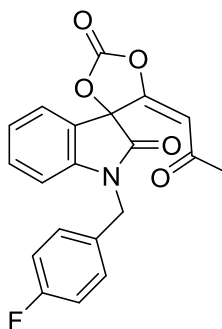

**(E)-1-(4-fluorobenzyl)-5'-(2-oxopropylidene)spiro[indoline-3,4'-[1,3]dioxolane]-2,2'-dione (2g)**

A white solid, 91% yield (100 mg). M.p.: Decomposition above 60 °C. <sup>1</sup>H NMR (CDCl<sub>3</sub>, TMS, 400 MHz) δ 2.13 (s, 3H, CH<sub>3</sub>), 4.88 (d, *J* = 15.6 Hz, 1H, CH<sub>2</sub>), 5.07 (d, *J* = 15.6 Hz, 1H, CH<sub>2</sub>), 6.40 (s, 1H, =CH), 6.76 (d, *J* = 8.0 Hz, 1H, ArH), 7.05 (t, *J* = 8.0 Hz, 3H, ArH), 7.17 (d, *J* = 7.2 Hz, 1H, ArH), 7.32 (t, *J* = 7.6 Hz, 1H, ArH), 7.39-7.43 (m, 2H, ArH). <sup>13</sup>C NMR (CDCl<sub>3</sub>, TMS, 100 MHz) δ 31.1, 44.2, 86.0, 105.0, 109.9, 115.8 (d, *J* = 21.4 Hz), 121.3, 123.68, 123.70, 129.1 (d, *J* = 8.1 Hz), 130.3 (d, *J* = 3.2 Hz), 132.3, 145.3, 149.3, 157.8, 162.4 (d, *J* = 244.9 Hz), 166.8, 195.6. <sup>19</sup>F NMR (376 MHz, CDCl<sub>3</sub>, CFCl<sub>3</sub>) δ -114.28-(-114.20). IR (EtOH) ν 2979, 2917, 2844, 1731, 1706, 1510, 1488, 1370, 1223, 1006, 750 cm<sup>-1</sup>. HRMS (DART Positive Ion Mode) Calcd. For C<sub>20</sub>H<sub>18</sub>O<sub>5</sub>N<sub>2</sub>F<sup>+</sup>(M+NH<sub>4</sub>)<sup>+</sup> requires 385.1194, Found: 385.1194. [α]<sub>D</sub><sup>25</sup> = +34.00 (c 0.05, CH<sub>2</sub>Cl<sub>2</sub>) for 80% *ee*; Enantiomeric excess was determined by HPLC with a Chiralcel AD-H column, Hexane/<sup>i</sup>PrOH = 90/10, 0.7 mL/min, 254 nm, *t*<sub>minor</sub> = 44.315 min, *t*<sub>major</sub> = 34.033 min.

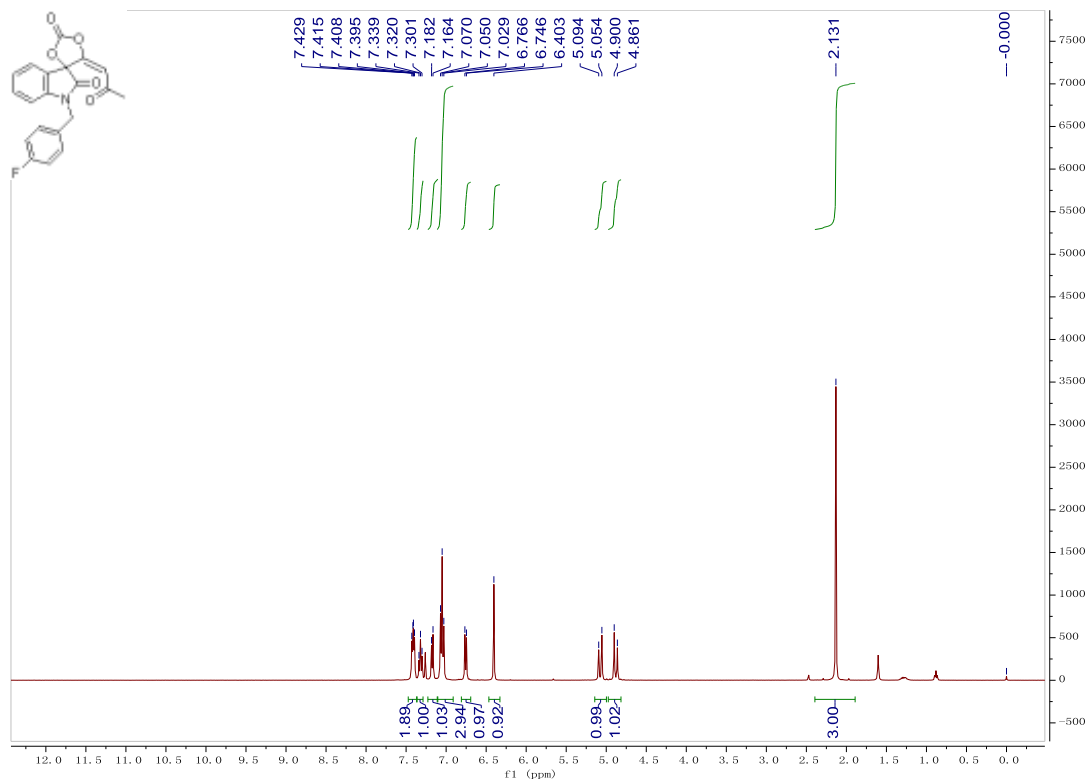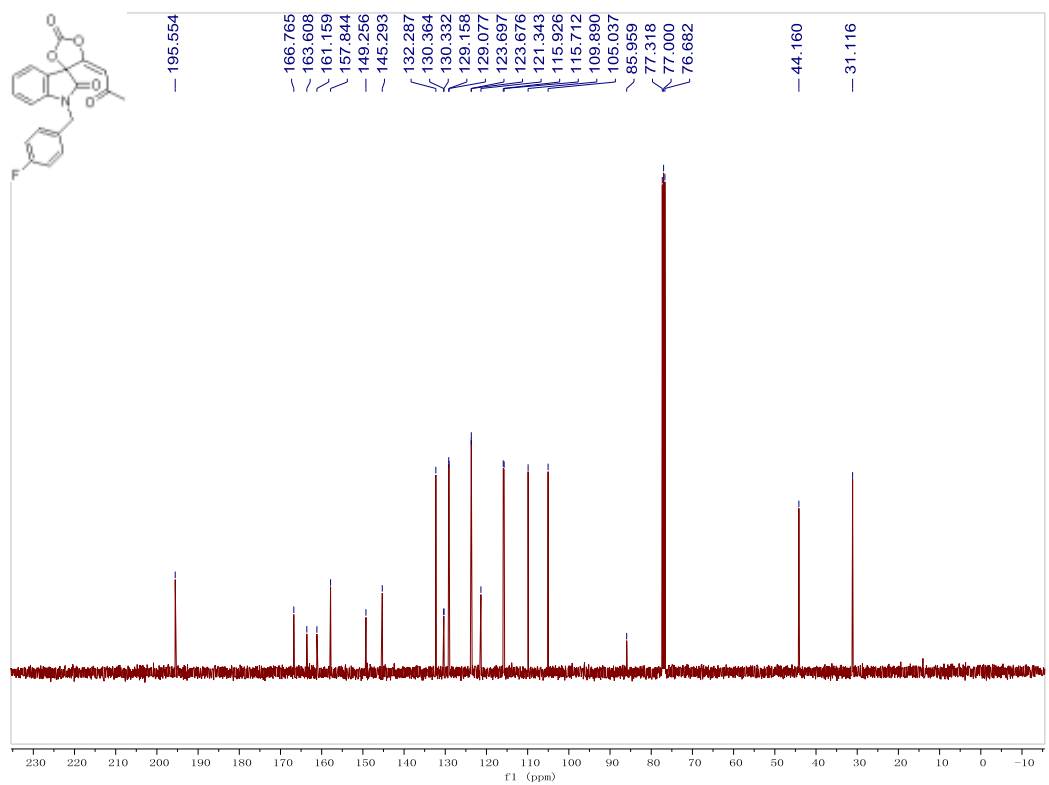



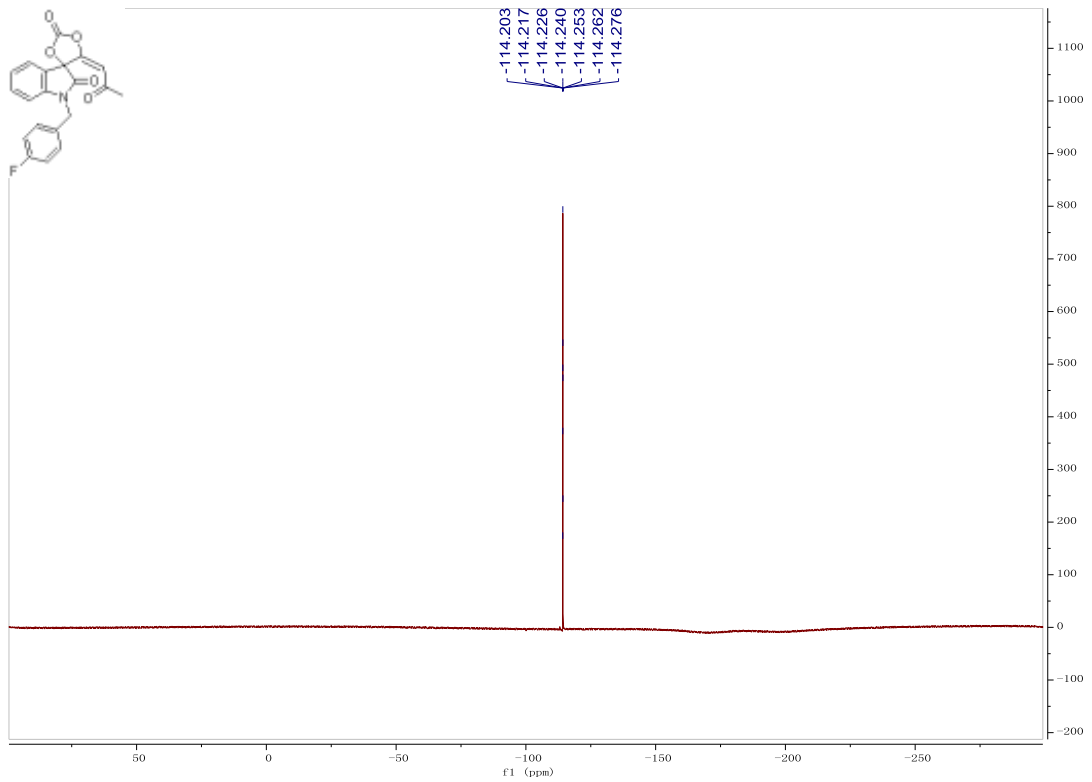

实验时间: 2019-07-19, 20:19:48  
谱图文件: D:\Sun Yaoliang\co2\17-97-a-rac.org

实验者:  
报告时间: 2019-07-19, 20:20:50  
积分方法: 面积归一法

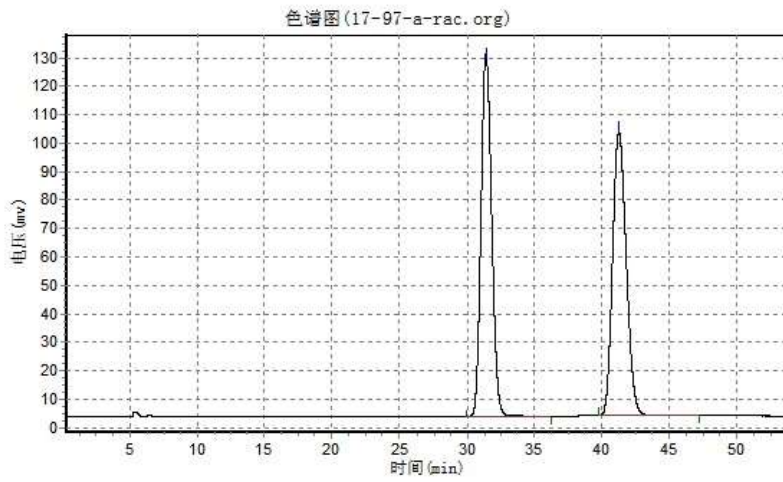

分析结果表

| 峰号 | 峰名 | 保留时间   | 峰高         | 峰面积          | 含量       |
|----|----|--------|------------|--------------|----------|
| 1  |    | 31.457 | 126717.602 | 7011456.000  | 49.7774  |
| 2  |    | 41.323 | 99600.438  | 7074177.500  | 50.2226  |
| 总计 |    |        | 226318.039 | 14085633.500 | 100.0000 |

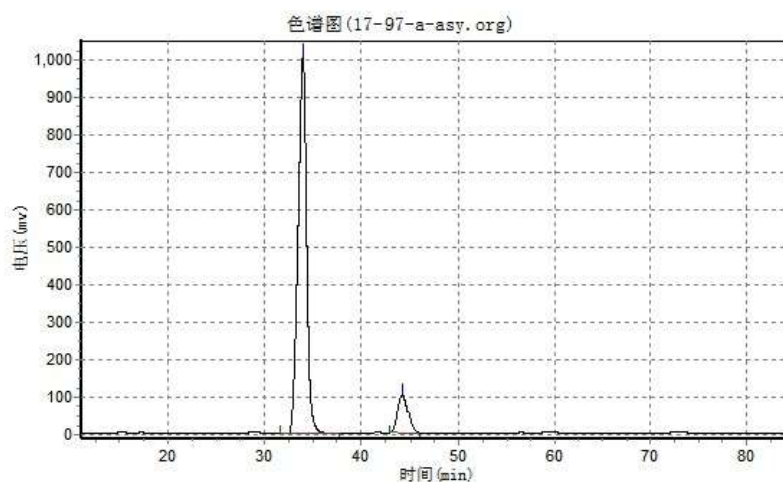

分析结果表

| 峰号 | 峰名 | 保留时间   | 峰高          | 峰面积          | 含量       |
|----|----|--------|-------------|--------------|----------|
| 1  |    | 34.033 | 1007321.813 | 62061524.000 | 89.4077  |
| 2  |    | 44.315 | 102006.945  | 7352558.000  | 10.5923  |
| 总计 |    |        | 1109328.758 | 69414082.000 | 100.0000 |

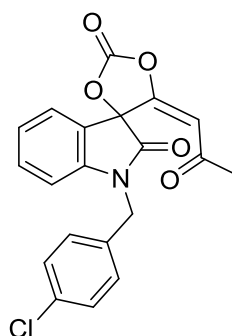

**(E)-1-(4-chlorobenzyl)-5'-(2-oxopropylidene)spiro[indoline-3,4'-[1,3]dioxolane]-2,2'-dione (2h)**

A white solid, 87% yield (100 mg). M.p.: Decomposition above 60 °C. <sup>1</sup>H NMR (CDCl<sub>3</sub>, TMS, 400 MHz) δ 2.13 (s, 3H, CH<sub>3</sub>), 4.89 (d, *J* = 16.0 Hz, 1H, CH<sub>2</sub>), 5.06 (d, *J* = 16.0 Hz, 1H, CH<sub>2</sub>), 6.41 (s, 1H, =CH), 6.73 (d, *J* = 8.0 Hz, 1H, ArH), 7.05 (t, *J* = 7.2 Hz, 1H, ArH), 7.18 (d, *J* = 7.2 Hz, 1H, ArH), 7.32-7.40 (m, 5H, ArH). <sup>13</sup>C NMR (CDCl<sub>3</sub>, TMS, 100 MHz) δ 31.1, 44.2, 85.9, 105.1, 109.9, 121.3, 123.71, 123.72, 128.7, 129.1, 132.3, 133.1, 133.8, 145.2, 149.2, 157.8, 166.8, 195.6. IR (EtOH) ν 2977, 2909, 2844, 1732, 1703, 1607, 1489, 1360, 1262, 1092, 1044, 797, 751 cm<sup>-1</sup>. HRMS (DART Positive Ion Mode) Calcd. For C<sub>20</sub>H<sub>18</sub>O<sub>5</sub>N<sub>2</sub>Cl<sup>+</sup>(M+NH<sub>4</sub>)<sup>+</sup> requires 401.0899, Found: 401.0897. [α]<sub>D</sub><sup>25</sup> = +81.67 (c 0.04, CH<sub>2</sub>Cl<sub>2</sub>) for 84% *ee*; Enantiomeric excess was determined by HPLC with a Chiralcel AD-H column, Hexane/<sup>*i*</sup>PrOH = 90/10, 0.7 mL/min, 254 nm, *t*<sub>minor</sub> = 38.423

min,  $t_{major} = 26.885$  min.

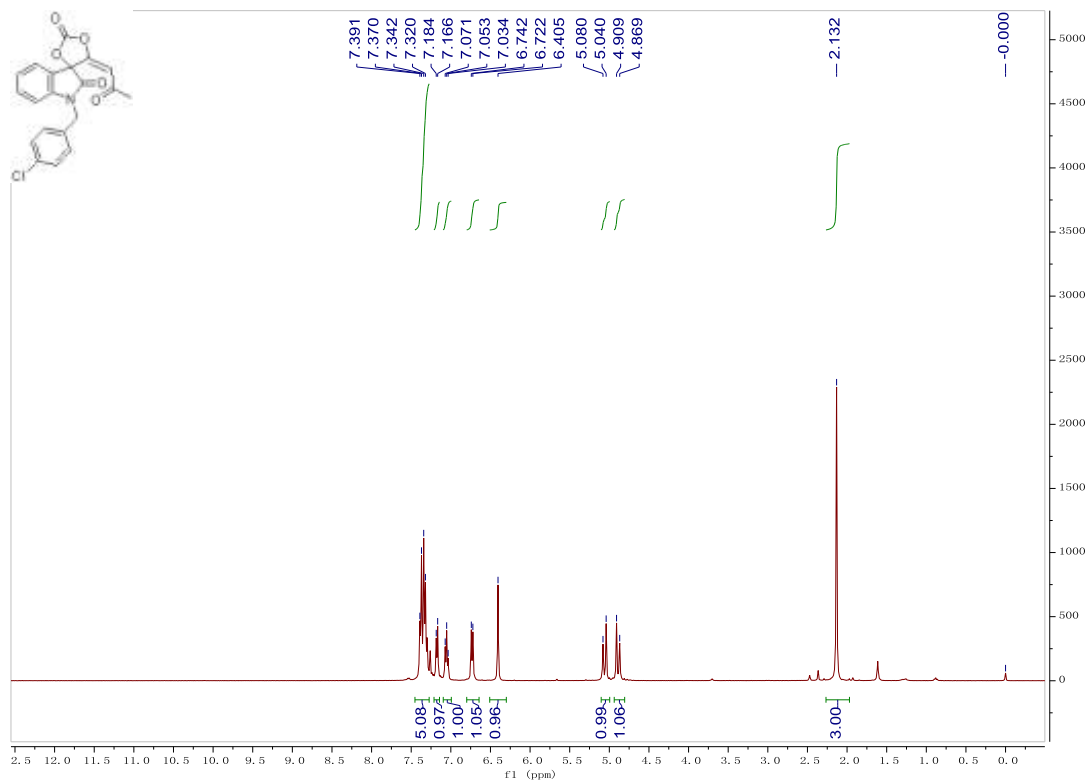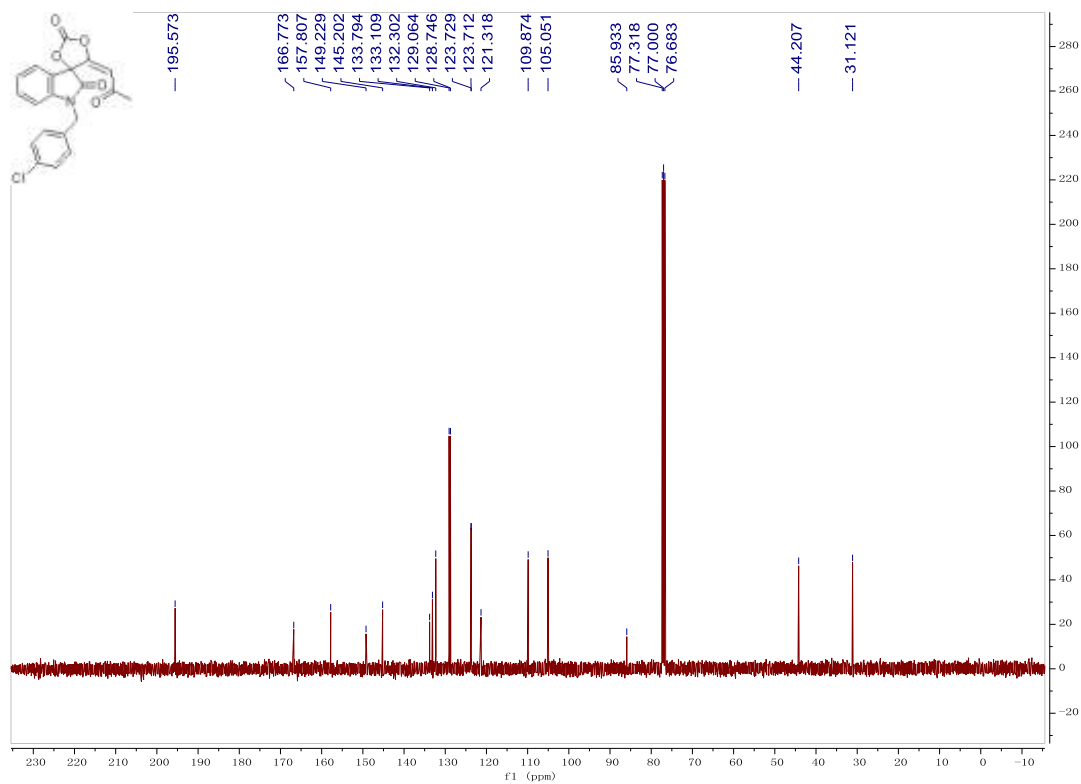

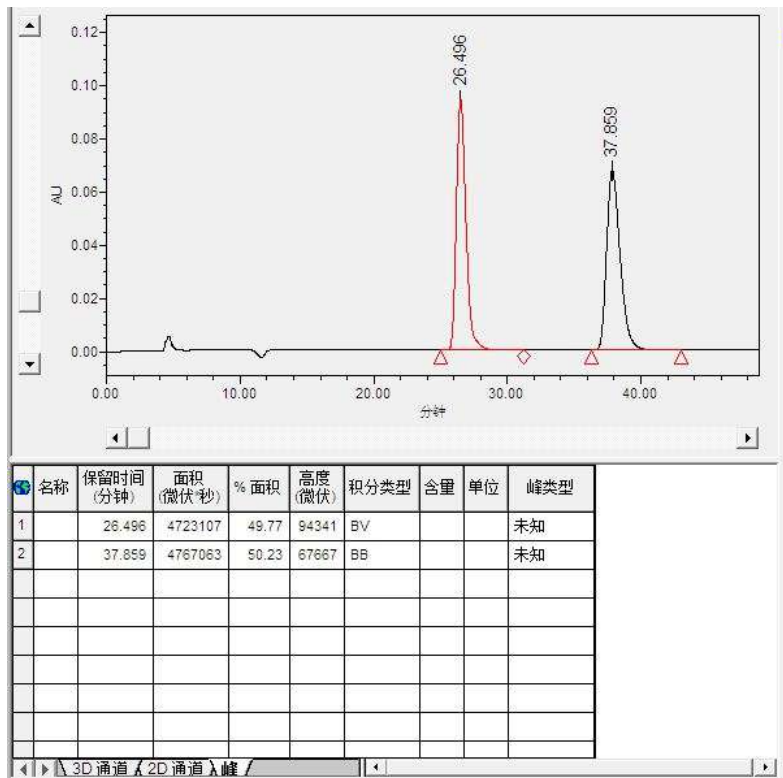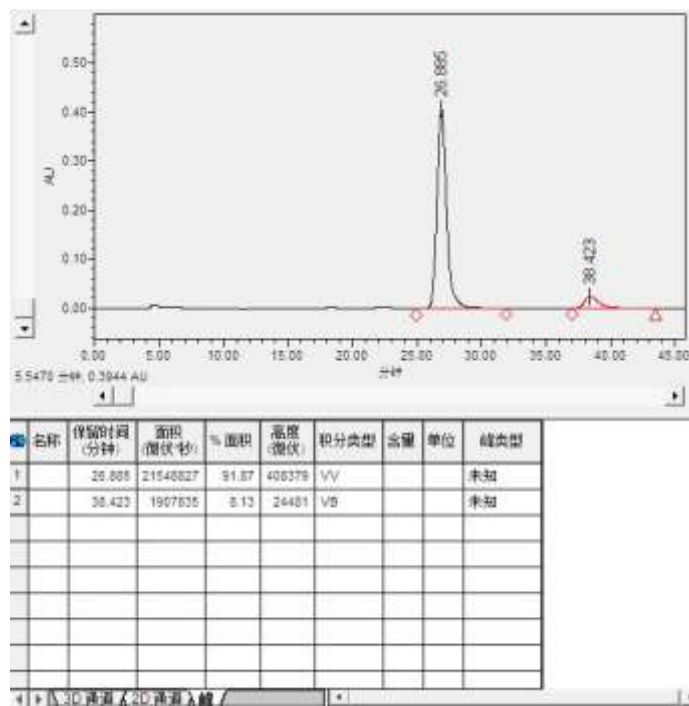

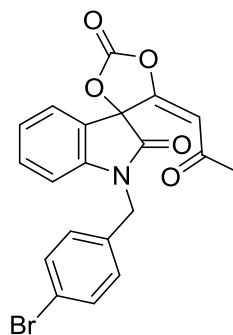

**(*E*)-1-(4-bromobenzyl)-5'-(2-oxopropylidene)spiro[indoline-3,4'-[1,3]dioxolane]-2,2'-dione (2i)**

A white solid, 81% yield (104 mg). M.p.: Decomposition above 60 °C. <sup>1</sup>H NMR (CDCl<sub>3</sub>, TMS, 400 MHz) δ 2.13 (s, 3H, CH<sub>3</sub>), 4.87 (d, *J* = 16.0 Hz, 1H, CH<sub>2</sub>), 5.04 (d, *J* = 16.0 Hz, 1H, CH<sub>2</sub>), 6.40 (s, 1H, =CH), 6.73 (d, *J* = 8.0 Hz, 1H, ArH), 7.05 (t, *J* = 7.6 Hz, 1H, ArH), 7.17 (d, *J* = 7.2 Hz, 1H, ArH), 7.30-7.34 (m, 3H, ArH), 7.49 (d, *J* = 8.4 Hz, 2H, ArH). <sup>13</sup>C NMR (CDCl<sub>3</sub>, TMS, 100 MHz) δ 31.1, 44.3, 85.9, 105.1, 109.9, 121.3, 121.9, 123.71, 123.74, 129.1, 132.0, 132.3, 133.6, 145.2, 149.2, 157.8, 166.8, 195.6. IR (EtOH) ν 2985, 2925, 2852, 1733, 1704, 1607, 1488, 1467, 1261, 1166, 1011 cm<sup>-1</sup>. HRMS (DART Positive Ion Mode) Calcd. For C<sub>19</sub>H<sub>15</sub>O<sub>3</sub>NBr<sup>+</sup>(M+H-CO<sub>2</sub>)<sup>+</sup> requires 384.0229, Found: 384.0230. [α]<sub>D</sub><sup>25</sup> = +34.17 (c 0.04, CH<sub>2</sub>Cl<sub>2</sub>) for 85% *ee*; Enantiomeric excess was determined by HPLC with a Chiralcel AD-H column, Hexane/<sup>i</sup>PrOH = 90/10, 0.7 mL/min, 254 nm, *t*<sub>minor</sub> = 63.191 min, *t*<sub>major</sub> = 41.278 min.

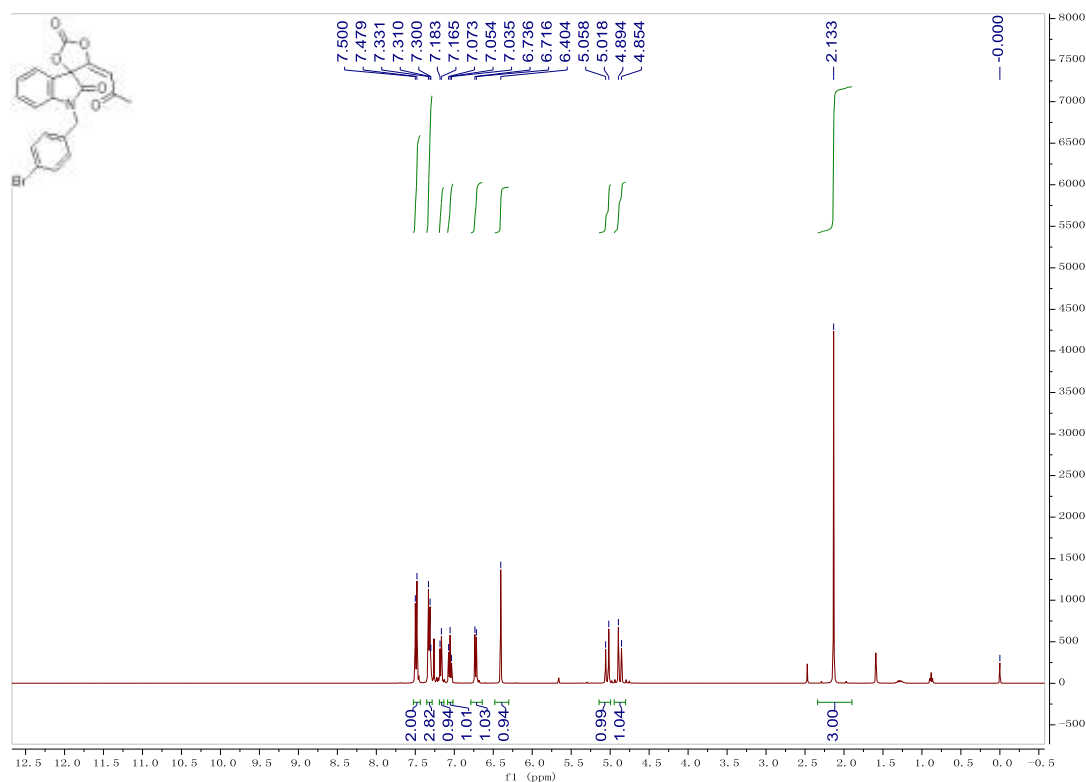

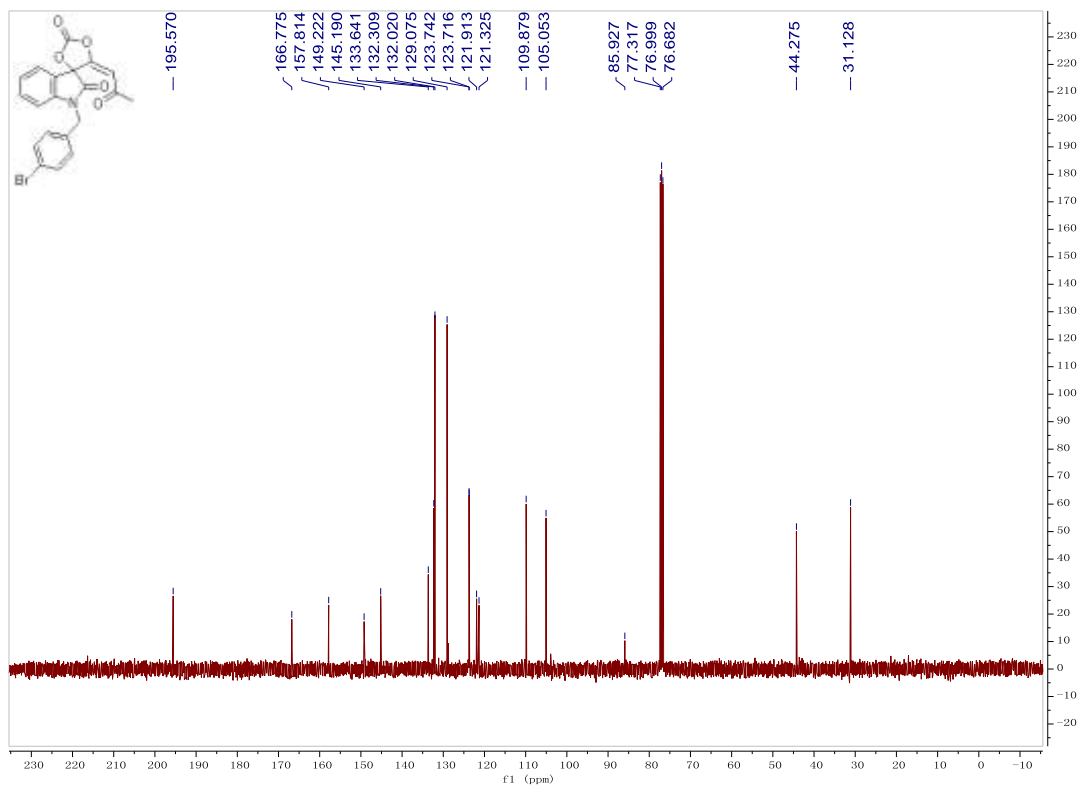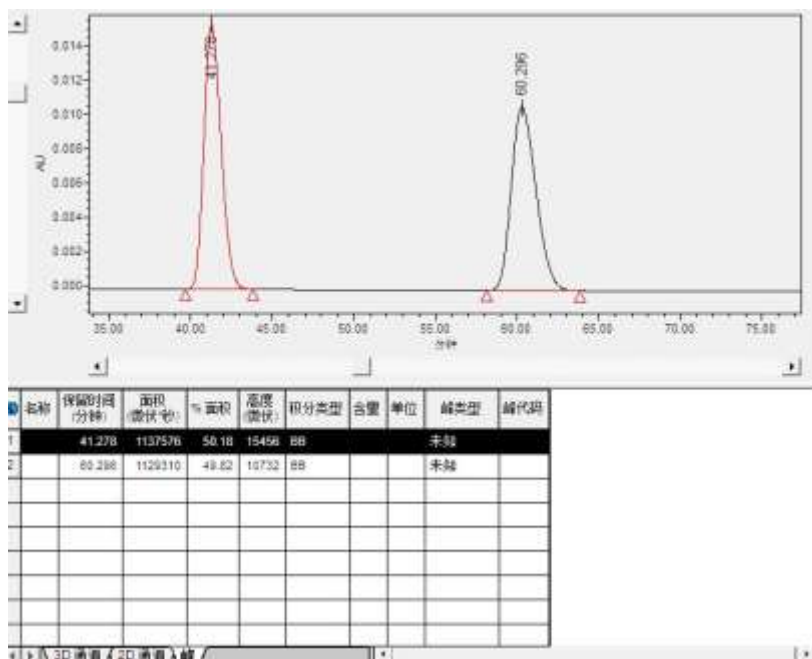

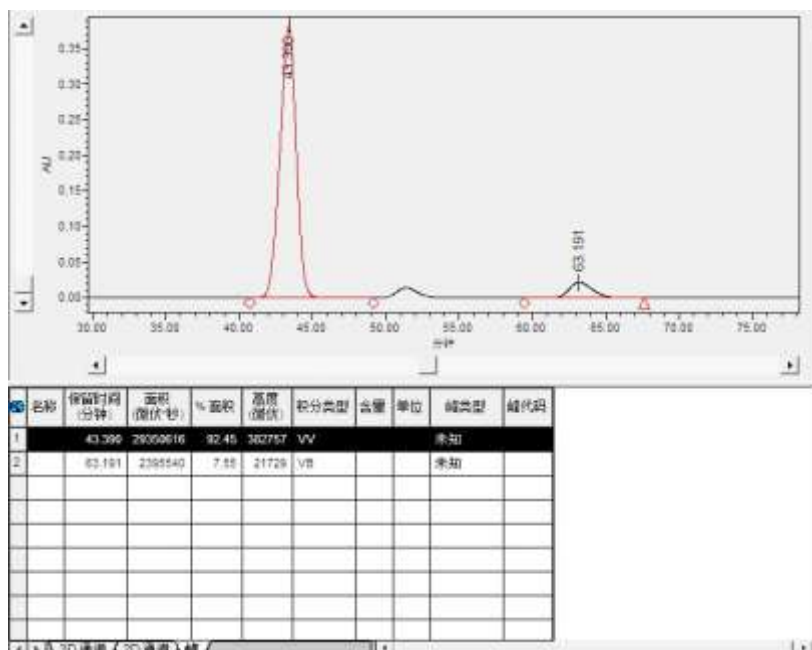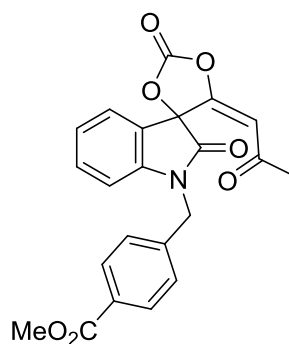

**methyl**

**(*E*)-4-((2,2'-dioxo-5'-(2-oxopropylidene)spiro[indoline-3,4'-[1,3]dioxolan]-1-yl)methyl)benzoate (2j)**

A white solid, 57% yield (70 mg). M.p.: Decomposition above 60 °C. <sup>1</sup>H NMR (CDCl<sub>3</sub>, TMS, 400 MHz) δ 2.14 (s, 3H, CH<sub>3</sub>), 3.91 (s, 3H, CH<sub>3</sub>), 4.97 (d, *J* = 16.4 Hz, 1H, CH<sub>2</sub>), 5.15 (d, *J* = 16.4 Hz, 1H, CH<sub>2</sub>), 6.42 (s, 1H, =CH), 6.70 (d, *J* = 8.0 Hz, 1H, ArH), 7.06 (t, *J* = 7.6 Hz, 1H, ArH), 7.19 (d, *J* = 7.2 Hz, 1H, ArH), 7.31 (t, *J* = 7.6 Hz, 1H, ArH), 7.52 (d, *J* = 8.0 Hz, 2H, ArH), 8.04 (d, *J* = 8.0 Hz, 2H, ArH). <sup>13</sup>C NMR (CDCl<sub>3</sub>, TMS, 100 MHz) δ 31.1, 44.6, 52.2, 85.9, 105.1, 109.9, 121.3, 123.7, 123.8, 127.2, 129.8, 130.2, 132.3, 139.7, 145.2, 149.2, 157.8, 166.6, 166.8, 195.6. IR (EtOH) ν 3115, 2959, 2925, 2846, 1722, 1704, 1607, 1488, 1434, 1360, 1165, 1019 cm<sup>-1</sup>. HRMS (DART Positive Ion Mode) Calcd. For C<sub>21</sub>H<sub>18</sub>O<sub>5</sub>N<sup>+</sup>(M+H-CO<sub>2</sub>)<sup>+</sup> requires 364.1179, Found: 364.1179.

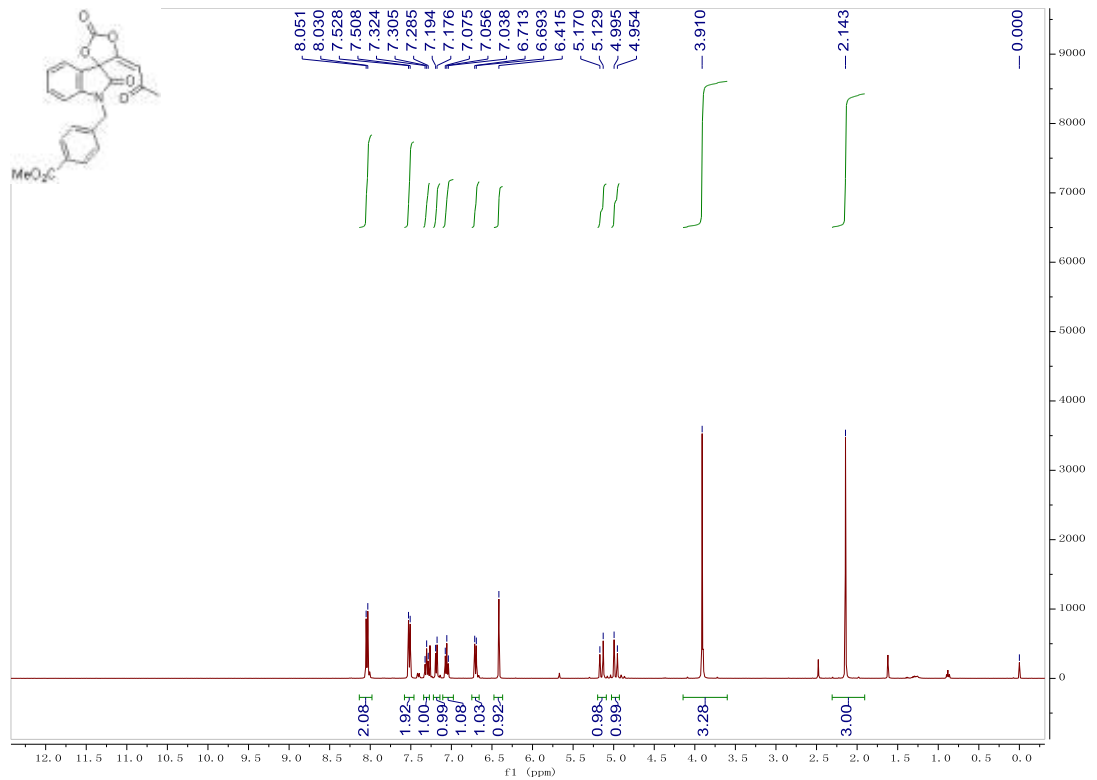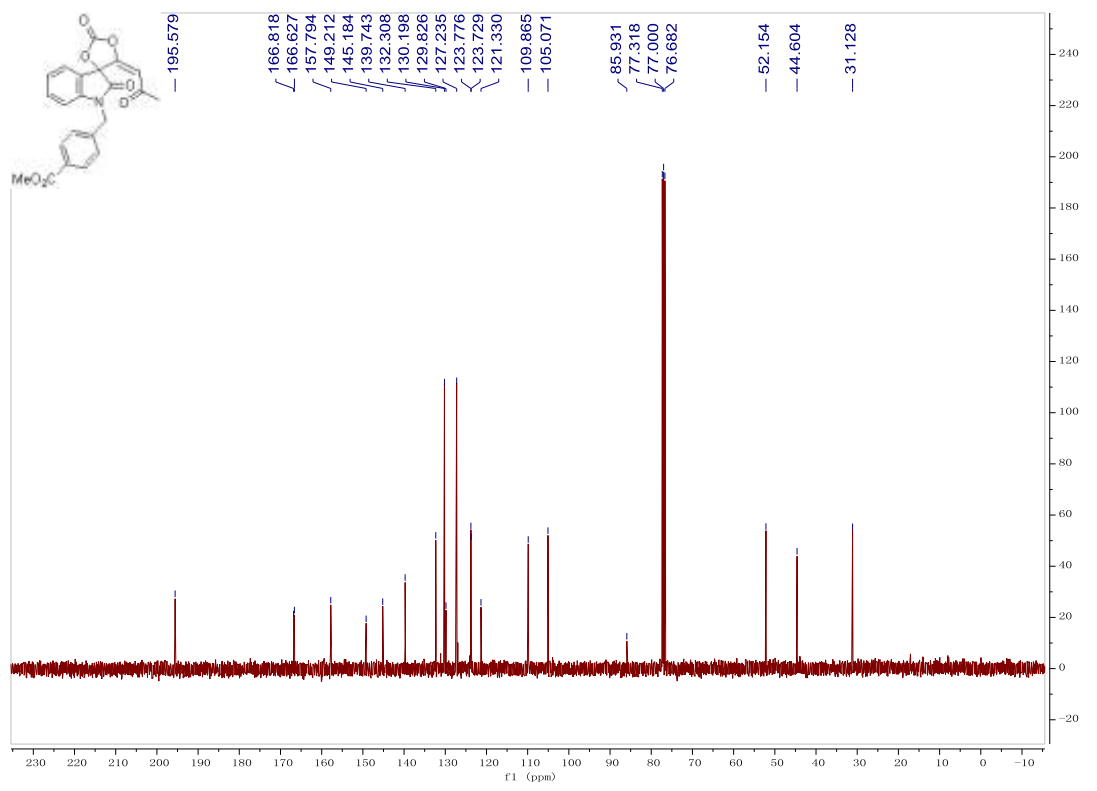



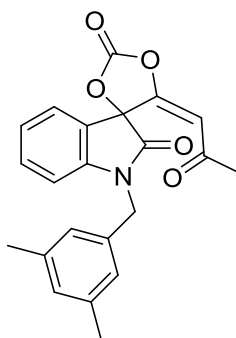

**(E)-1-(3,5-dimethylbenzyl)-5'-(2-oxopropylidene)spiro[indoline-3,4'-[1,3]dioxolane]-2,2'-dione  
(2k)**

A white solid, 79% yield (89 mg). M.p.: Decomposition above 60 °C.  $^1\text{H}$  NMR ( $\text{CDCl}_3$ , TMS, 400 MHz)  $\delta$  2.13 (s, 3H,  $\text{CH}_3$ ), 2.29 (s, 6H,  $\text{CH}_3$ ), 4.78 (d,  $J = 15.6$  Hz, 1H,  $\text{CH}_2$ ), 5.07 (d,  $J = 15.6$  Hz, 1H,  $\text{CH}_2$ ), 6.39 (s, 1H, =CH), 6.80 (d,  $J = 8.0$  Hz, 1H, ArH), 6.93 (s, 1H, ArH), 7.01-7.05 (m, 3H, ArH), 7.16 (dd,  $J = 1.2, 7.6$  Hz, 1H, ArH), 7.31 (dt,  $J = 1.2, 7.6$  Hz, 1H, ArH).  $^{13}\text{C}$  NMR ( $\text{CDCl}_3$ , TMS, 100 MHz)  $\delta$  21.2, 31.1, 44.8, 86.1, 105.0, 110.1, 121.3, 123.46, 123.53, 125.1, 129.5, 132.3, 134.4, 138.4, 145.7, 149.4, 158.0, 166.8, 195.3. IR (EtOH)  $\nu$  2987, 2925, 2854, 1759, 1732, 1705, 1487, 1467, 1369, 1261, 1165, 1032, 752  $\text{cm}^{-1}$ . HRMS (DART Positive Ion Mode) Calcd. For  $\text{C}_{22}\text{H}_{20}\text{O}_5\text{N}^+ (\text{M}+\text{H})^+$  requires 378.1336, Found: 378.1335.  $[\alpha]_{\text{D}}^{25} = +65.83$  (c 0.04,  $\text{CH}_2\text{Cl}_2$ ) for 82% *ee*; Enantiomeric excess was determined by HPLC with a Chiralcel AD-H column, Hexane/*i*PrOH = 90/10, 0.7 mL/min, 254 nm,  $t_{\text{minor}} = 24.080$  min,  $t_{\text{major}} = 17.583$  min.

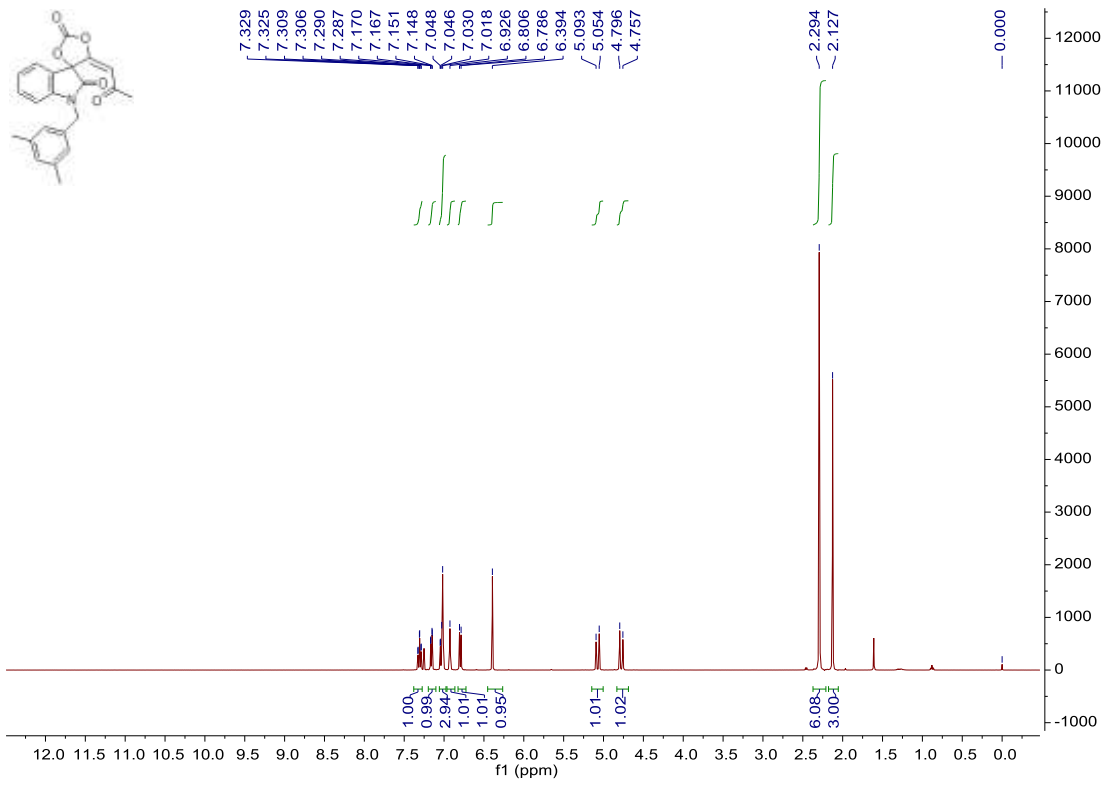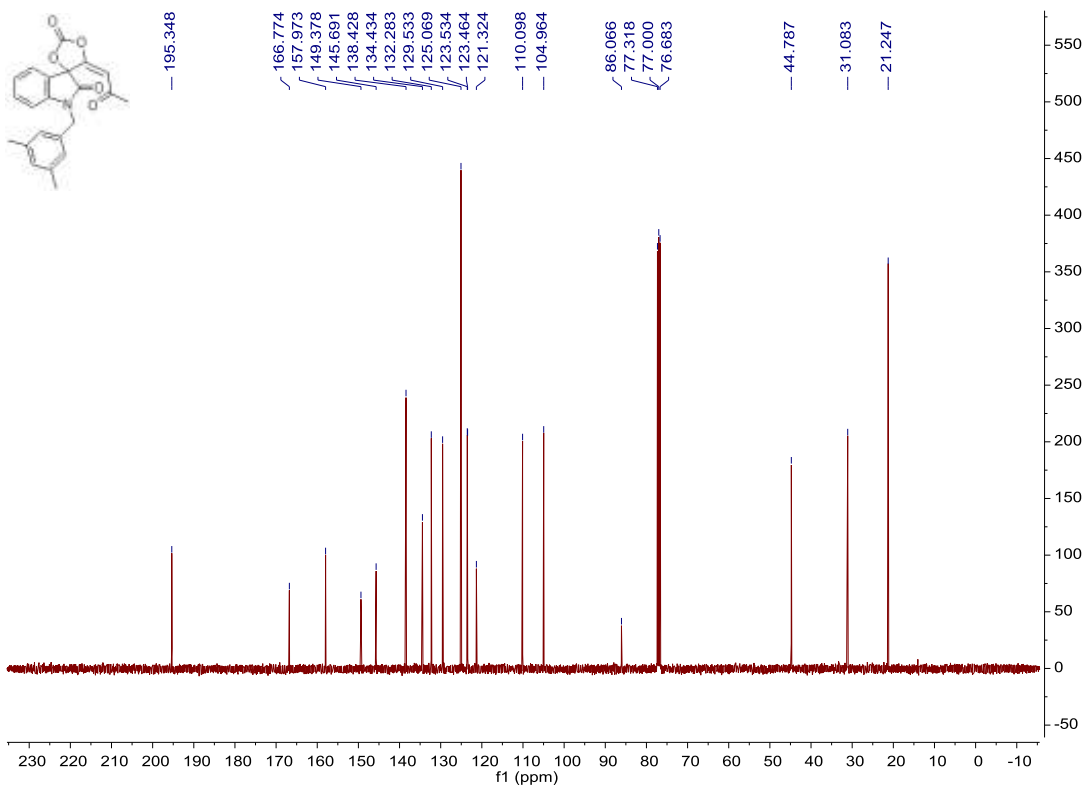

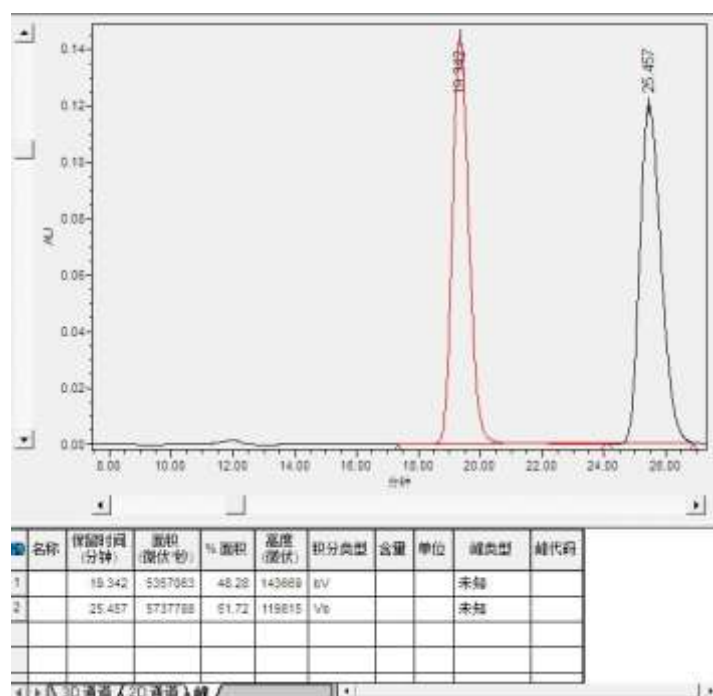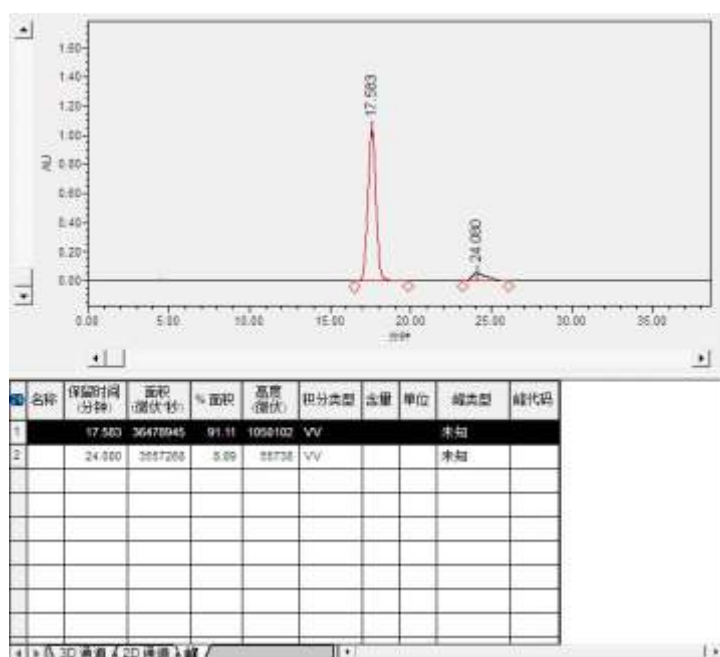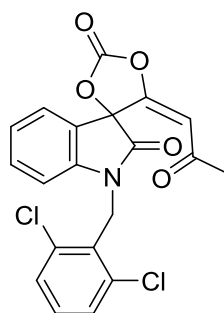

**(E)-1-(2,6-dichlorobenzyl)-5'-(2-oxopropylidene)spiro[indoline-3,4'-[1,3]dioxolane]-2,2'-dione**

**(2I)**

A white solid, 89% yield (111 mg). M.p.: 153-155 °C.  $^1\text{H}$  NMR ( $\text{CDCl}_3$ , TMS, 400 MHz)  $\delta$  2.13 (s, 3H,  $\text{CH}_3$ ), 5.13 (d,  $J = 15.2$  Hz, 1H,  $\text{CH}_2$ ), 5.48 (d,  $J = 15.2$  Hz, 1H,  $\text{CH}_2$ ), 6.37 (s, 1H, =CH), 6.84 (d,  $J = 8.0$  Hz, 1H, ArH), 7.01 (t,  $J = 7.2$  Hz, 1H, ArH), 7.14 (d,  $J = 7.2$  Hz, 1H, ArH), 7.21-7.38 (m, 4H, ArH).  $^{13}\text{C}$  NMR ( $\text{CDCl}_3$ , TMS, 100 MHz)  $\delta$  31.1, 40.7, 85.7, 104.8, 109.9, 121.2, 123.3, 123.6, 129.0, 129.5, 130.1, 132.3, 136.4, 145.3, 149.3, 158.2, 165.9, 195.5. IR (EtOH)  $\nu$  2953, 2922, 2852, 1850, 1737, 1706, 1608, 1467, 1165, 1005, 781  $\text{cm}^{-1}$ . HRMS (DART Positive Ion Mode) Calcd. For  $\text{C}_{20}\text{H}_{17}\text{O}_5\text{N}_2\text{Cl}_2^{+1}(\text{M}+\text{NH}_4)^+$  requires 435.0509, Found: 435.0510.  $[\alpha]_D^{25} = +26.00$  (c 0.05,  $\text{CH}_2\text{Cl}_2$ ) for 94% *ee*; Enantiomeric excess was determined by HPLC with a Chiralcel AD-H column, Hexane/*i*PrOH = 90/10, 0.7 mL/min, 254 nm,  $t_{\text{minor}} = 32.792$  min,  $t_{\text{major}} = 41.460$  min.

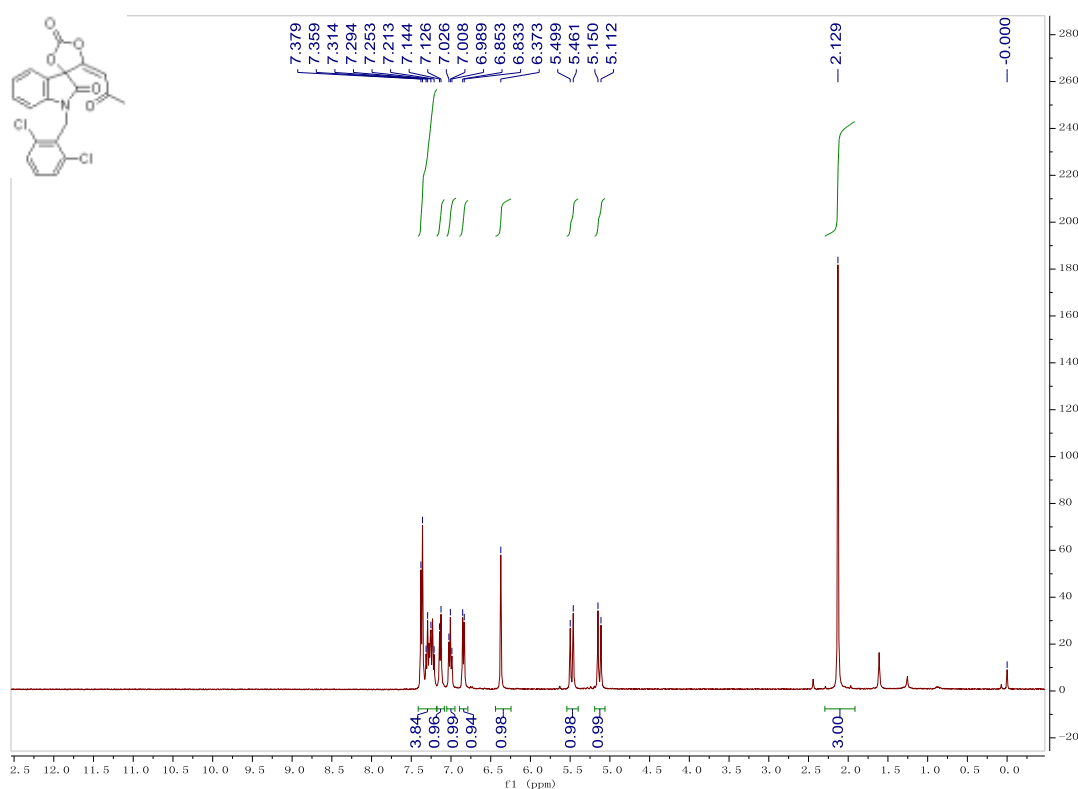

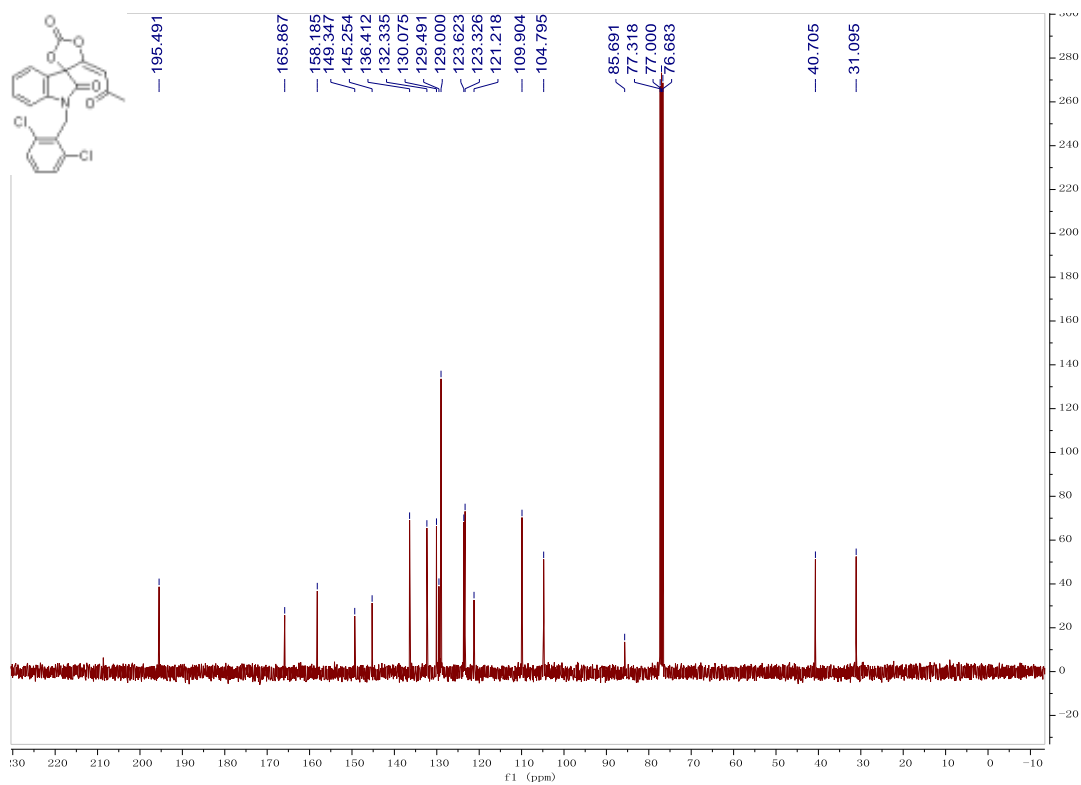

实验时间: 2019-07-15, 14:39:02  
谱图文件: D:\Sun Yaoliang\cc2\17-93-a-rac.org

实验者:  
报告时间: 2019-07-15, 14:40:07  
积分方法: 面积归一法

色谱图 (17-93-a-rac.org)

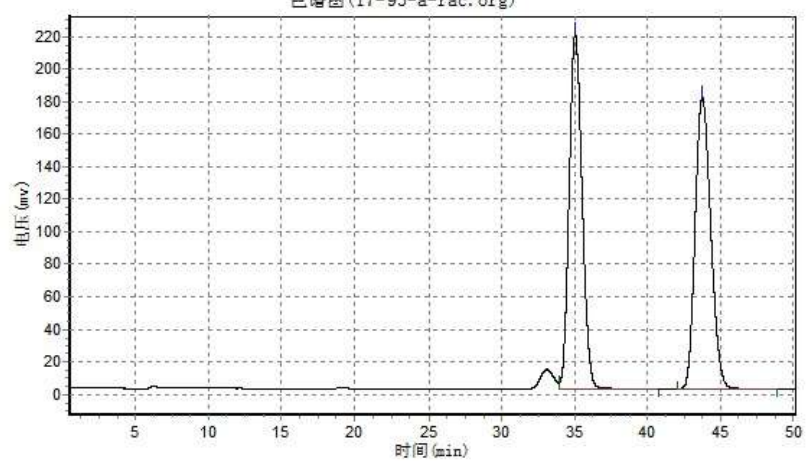

分析结果表

| 峰号 | 峰名 | 保留时间   | 峰高         | 峰面积          | 含量       |
|----|----|--------|------------|--------------|----------|
| 1  |    | 35.045 | 218327.922 | 13414662.000 | 50.2454  |
| 2  |    | 43.747 | 179030.703 | 13283606.000 | 49.7546  |
| 总计 |    |        | 397358.625 | 26698268.000 | 100.0000 |

实验时间: 2019-07-15, 15:45:54  
谱图文件: D:\Sun Yaoliang\co2\17-93-a-asy.org

实验者:  
报告时间: 2019-07-15, 15:46:39  
积分方法: 面积归一法

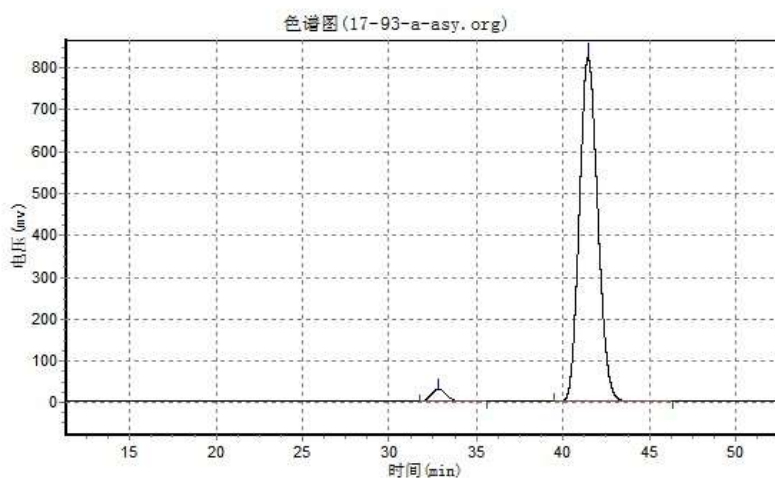

分析结果表

| 峰号 | 峰名 | 保留时间   | 峰高         | 峰面积          | 含量       |
|----|----|--------|------------|--------------|----------|
| 1  |    | 32.792 | 29349.188  | 1744505.000  | 2.8014   |
| 2  |    | 41.460 | 821401.438 | 60528092.000 | 97.1986  |
| 总计 |    |        | 850750.625 | 62272597.000 | 100.0000 |

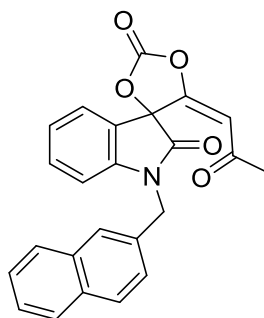

**(E)-1-(naphthalen-2-ylmethyl)-5'-(2-oxopropylidene)spiro[indoline-3,4'-[1,3]dioxolane]-2,2'-dione (2m)**

A white solid, 78% yield (93 mg). M.p.: Decomposition above 60 °C. <sup>1</sup>H NMR (CDCl<sub>3</sub>, TMS, 400 MHz) δ 2.15 (s, 3H, CH<sub>3</sub>), 5.28 (d, *J* = 16.4 Hz, 1H, CH<sub>2</sub>), 5.73 (d, *J* = 16.4 Hz, 1H, CH<sub>2</sub>), 6.42 (s, 1H, =CH), 6.74 (d, *J* = 7.6 Hz, 1H, ArH), 7.03 (t, *J* = 7.2 Hz, 1H, ArH), 7.17-7.27 (m, 2H, ArH), 7.43 (t, *J* = 7.6 Hz, 1H, ArH), 7.54-7.62 (m, 3H, ArH), 7.82 (d, *J* = 8.0 Hz, 1H, ArH), 7.91 (d, *J* = 8.0 Hz, 1H, ArH), 8.07 (d, *J* = 8.0 Hz, 1H, ArH). <sup>13</sup>C NMR (CDCl<sub>3</sub>, TMS, 100 MHz) δ 31.1, 43.0, 86.1, 105.0, 110.4, 121.4, 122.6, 123.59, 123.61, 124.5, 125.4, 126.0, 126.7, 128.5, 129.0, 129.4, 130.8, 132.3, 133.8, 145.8, 149.3, 158.0, 166.9, 195.6. IR (EtOH) ν 3060, 2919, 1732, 1701, 1603, 1467, 1322, 1165, 935, 736 cm<sup>-1</sup>. HRMS (DART Positive Ion Mode) Calcd. For C<sub>24</sub>H<sub>21</sub>O<sub>5</sub>N<sub>2</sub><sup>+</sup>(M+NH<sub>4</sub>)<sup>+</sup> requires 417.1445, Found: 417.1444.

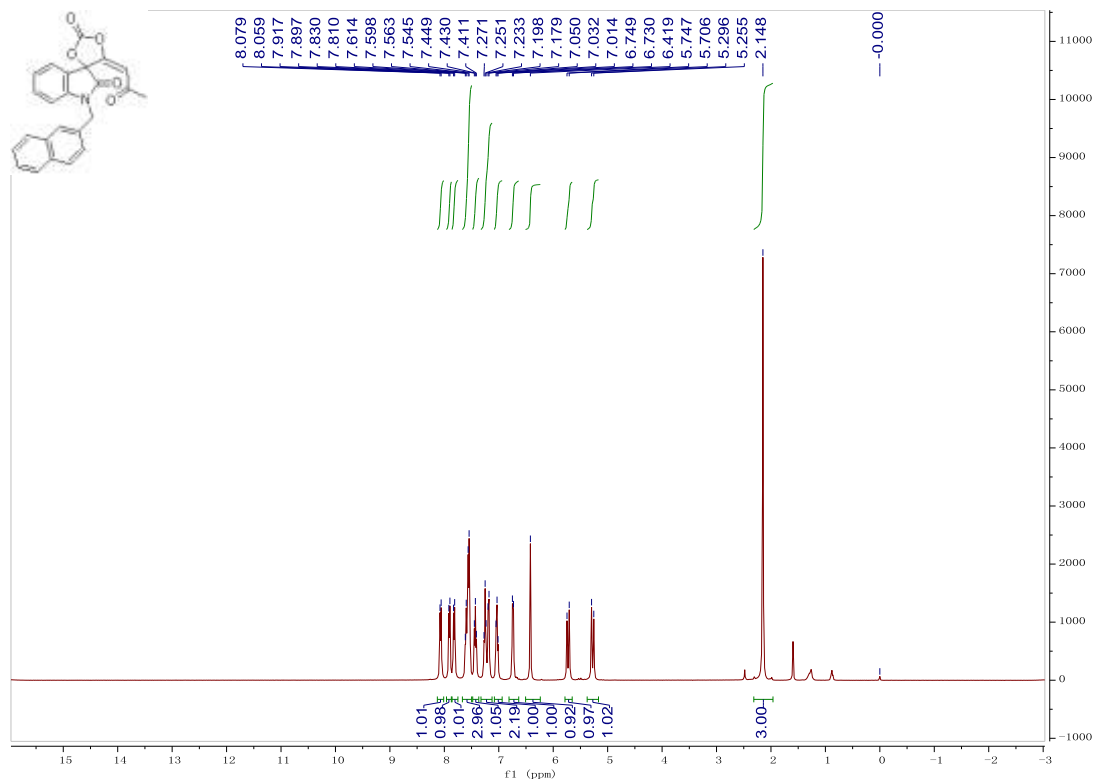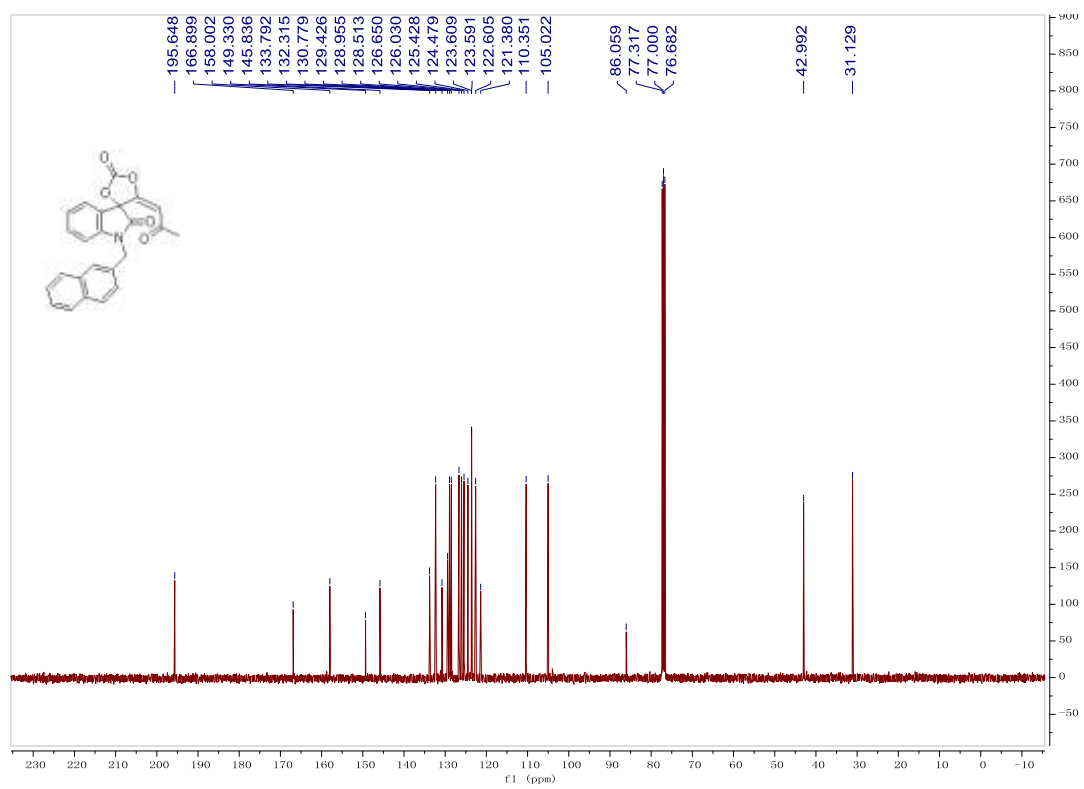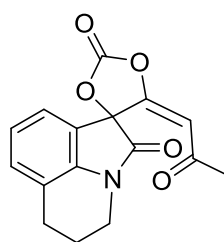

S103

**(E)-5'-(2-oxopropylidene)-5,6-dihydro-2H,4H-spiro[pyrrolo[3,2,1-ij]quinoline-1,4'-[1,3]dioxolane]-2,2'-dione (2n)**

A white solid, 87% yield (78 mg). M.p.: Decomposition above 60 °C. <sup>1</sup>H NMR (CDCl<sub>3</sub>, TMS, 400 MHz) δ 2.03-2.20 (m, 5H, CH<sub>2</sub>, CH<sub>3</sub>), 2.79-2.90 (m, 2H, CH<sub>2</sub>), 3.72-3.83 (m, 2H, CH<sub>2</sub>), 6.35 (s, 1H, =CH), 6.93-7.01 (m, 2H, ArH), 7.19 (d, *J* = 7.2 Hz, 1H, ArH). <sup>13</sup>C NMR (CDCl<sub>3</sub>, TMS, 100 MHz) δ 20.7, 24.2, 31.1, 39.3, 86.9, 104.8, 119.7, 121.0, 121.3, 122.9, 131.1, 142.2, 149.5, 158.1, 165.3, 195.4. IR (EtOH) ν 2955, 2922, 2851, 1730, 1698, 1628, 1456, 1364, 1156 cm<sup>-1</sup>. HRMS (DART Positive Ion Mode) Calcd. For C<sub>15</sub>H<sub>14</sub>O<sub>3</sub>N<sup>+</sup>(M+H-CO<sub>2</sub>)<sup>+</sup> requires 256.0968, Found: 256.0967. [α]<sub>D</sub><sup>25</sup> = +93.33 (c 0.02, CH<sub>2</sub>Cl<sub>2</sub>) for 92% *ee*; Enantiomeric excess was determined by HPLC with a Chiralcel AS-H column, Hexane/<sup>i</sup>PrOH = 90/10, 0.7 mL/min, 254 nm, *t*<sub>minor</sub> = 72.097 min, *t*<sub>major</sub> = 56.102 min.

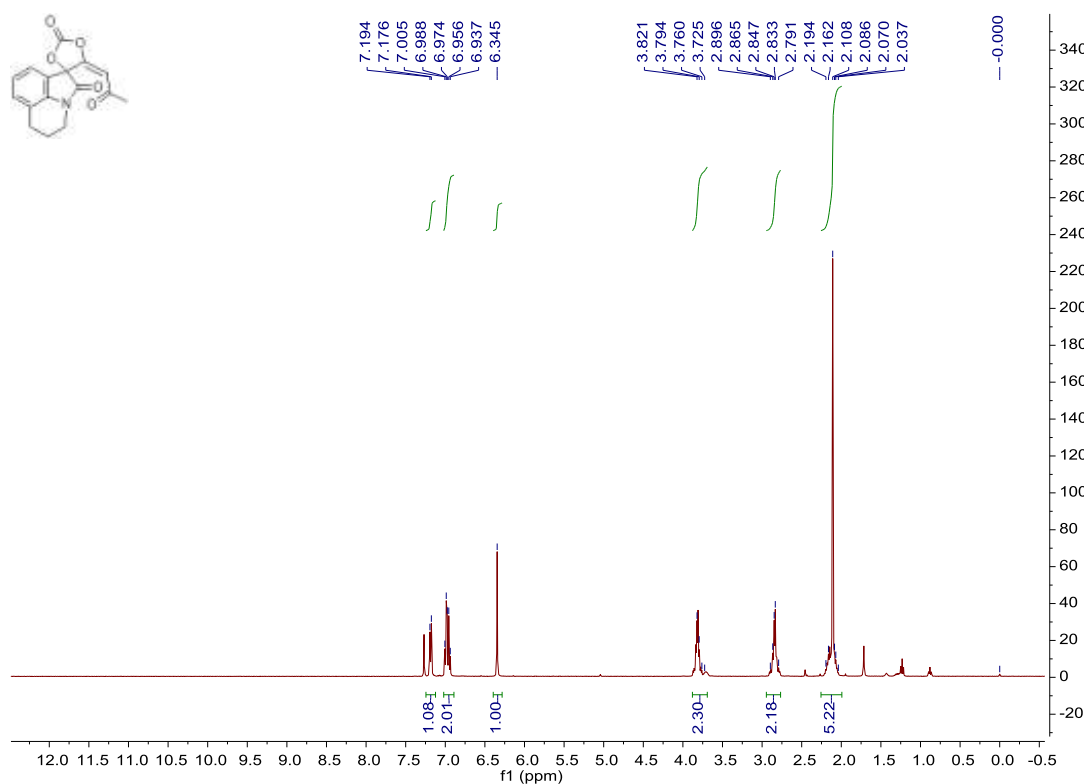



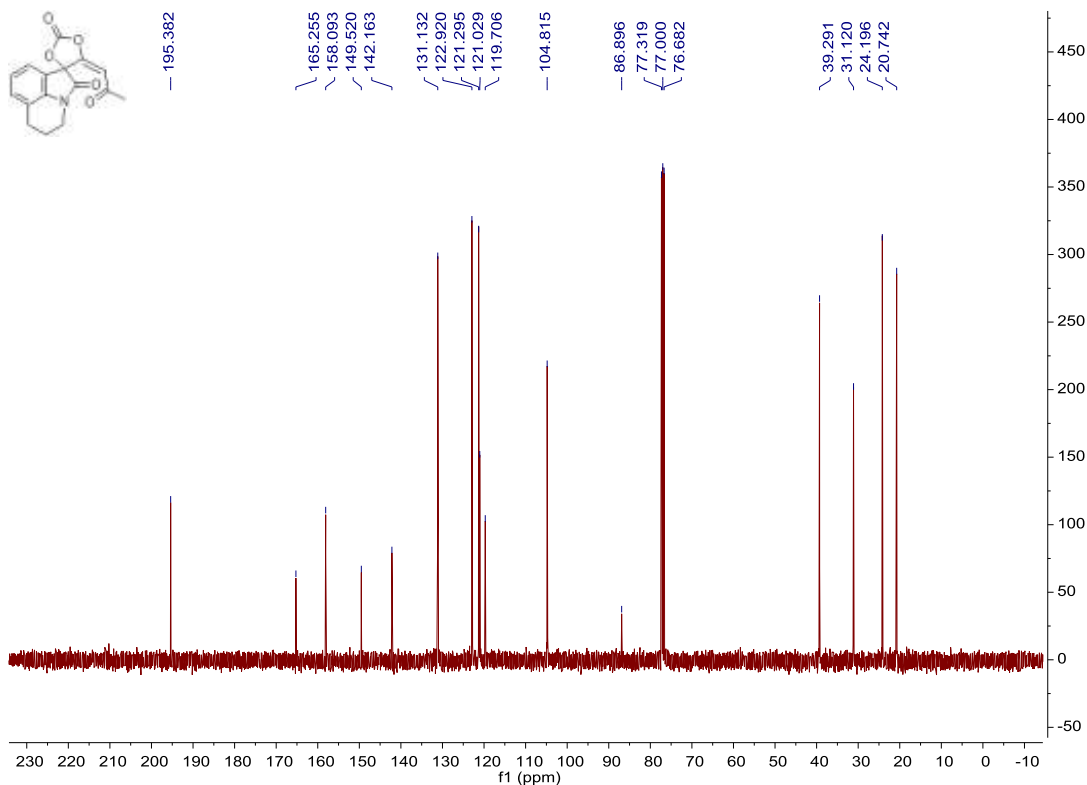

实验时间: 2018-04-28, 12:17:28  
谱图文件: D:\Sun Yaoliang\co2\18-12-a-rac.org

样品名:  
检测时间: 2018-04-28, 14:28:49  
积分方法: 面积归一法

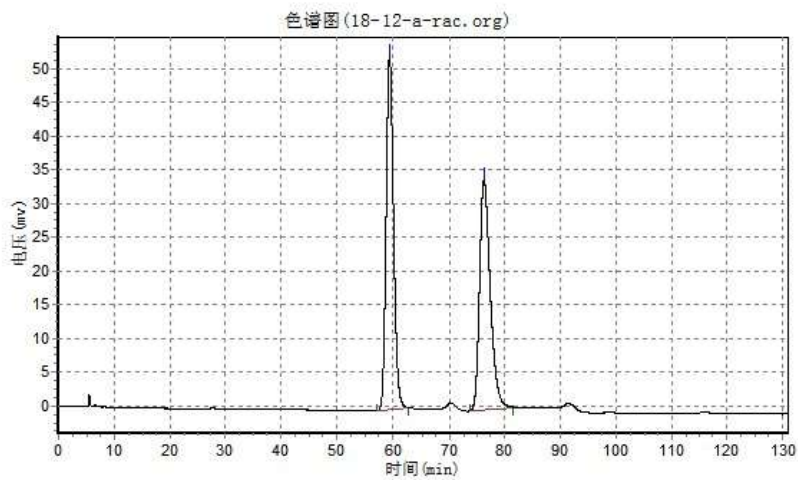

分析结果表

| 峰号 | 峰名 | 保留时间   | 峰高        | 峰面积         | 含量       |
|----|----|--------|-----------|-------------|----------|
| 1  |    | 59.515 | 52374.402 | 4816437.000 | 51.5167  |
| 2  |    | 76.242 | 34036.715 | 4532835.500 | 48.4833  |
| 总计 |    |        | 86411.117 | 9349272.500 | 100.0000 |

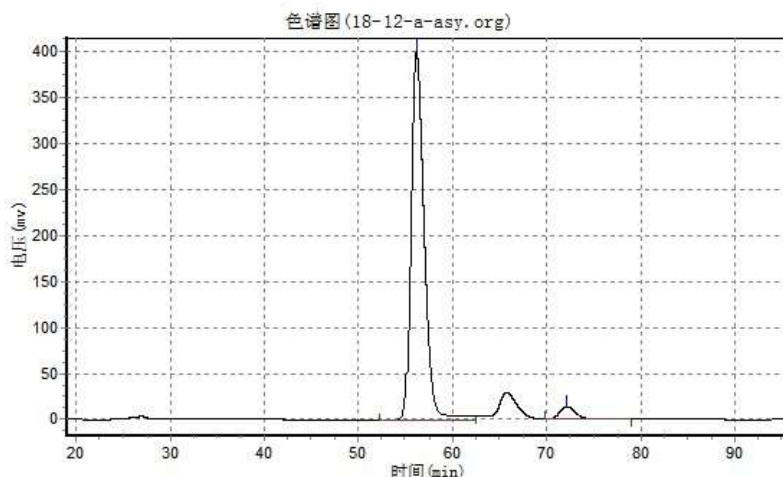

分析结果表

| 峰号 | 峰名 | 保留时间   | 峰高         | 峰面积          | 含量       |
|----|----|--------|------------|--------------|----------|
| 1  |    | 56.102 | 399785.313 | 37962588.000 | 95.8305  |
| 2  |    | 72.097 | 13940.969  | 1651700.750  | 4.1695   |
| 总计 |    |        | 413726.281 | 39614288.750 | 100.0000 |

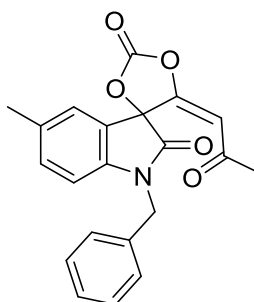

**(E)-1-benzyl-5-methyl-5'-(2-oxopropylidene)spiro[indoline-3,4'-[1,3]dioxolane]-2,2'-dione (2o)**

A white solid, 87% yield (95 mg). M.p.: Decomposition above 60 °C. <sup>1</sup>H NMR (CDCl<sub>3</sub>, TMS, 400 MHz) δ 2.15 (s, 3H, CH<sub>3</sub>), 2.26 (s, 3H, CH<sub>3</sub>), 4.84 (d, *J* = 16.0 Hz, 1H, CH<sub>2</sub>), 5.15 (d, *J* = 16.0 Hz, 1H, CH<sub>2</sub>), 6.39 (s, 1H, =CH), 6.64 (d, *J* = 8.0 Hz, 1H, ArH), 6.98 (s, 1H, ArH), 7.09 (d, *J* = 8.0 Hz, 1H, ArH), 7.25-7.42 (m, 5H, ArH). <sup>13</sup>C NMR (CDCl<sub>3</sub>, TMS, 100 MHz) δ 20.9, 31.2, 44.8, 86.3, 104.9, 109.8, 121.3, 124.3, 127.2, 127.8, 128.9, 132.6, 133.4, 134.7, 143.1, 149.4, 158.1, 166.7, 195.5. IR (EtOH) ν 3032, 2914, 2839, 1846, 1731, 1704, 1603, 1496, 1370, 1120, 813, 734 cm<sup>-1</sup>. HRMS (DART Positive Ion Mode) Calcd. For C<sub>21</sub>H<sub>21</sub>O<sub>5</sub>N<sub>2</sub><sup>+</sup>(M+NH<sub>4</sub>)<sup>+</sup> requires 381.1445, Found: 381.1445. [α]<sub>D</sub><sup>25</sup> = +125.83 (c 0.04, CH<sub>2</sub>Cl<sub>2</sub>) for 85% *ee*; Enantiomeric excess was determined by HPLC with a Chiralcel AD-H column, Hexane/*i*PrOH = 90/10, 0.7 mL/min, 254 nm, *t*<sub>minor</sub> = 30.906 min, *t*<sub>major</sub> = 21.525 min.

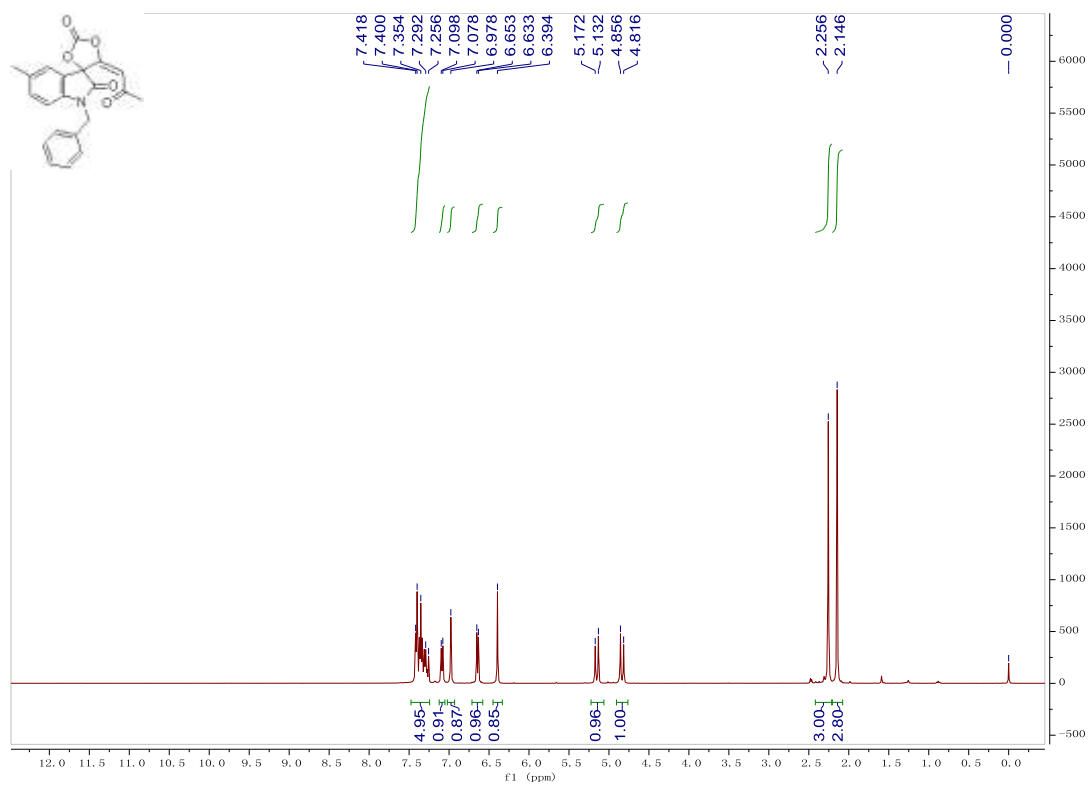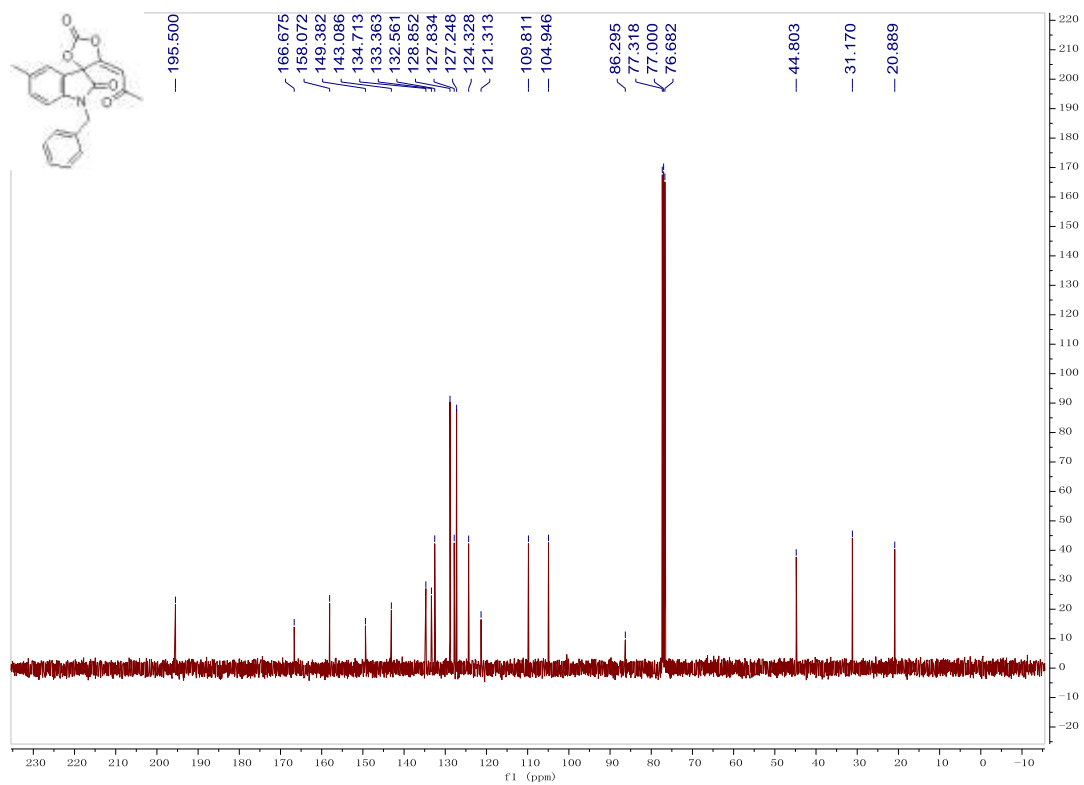

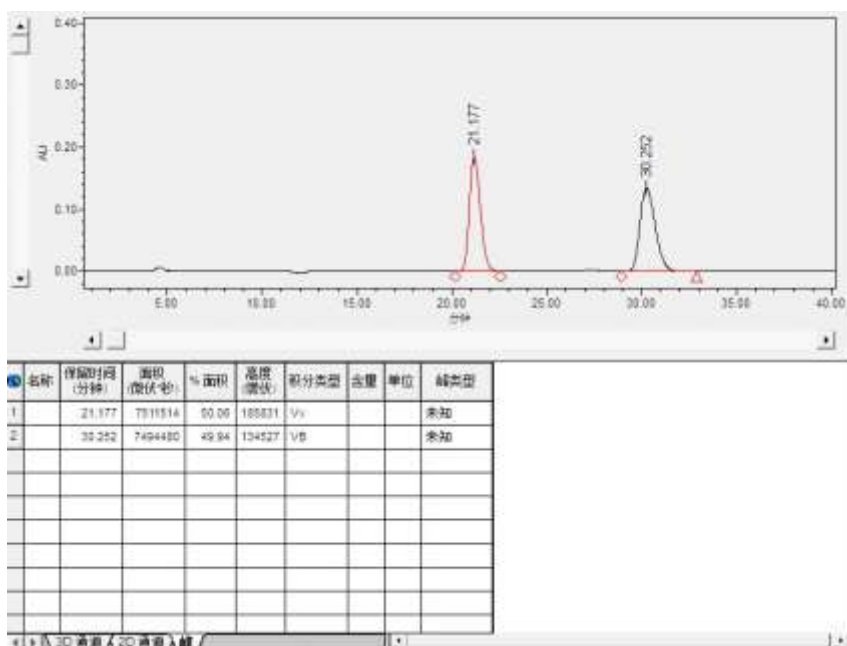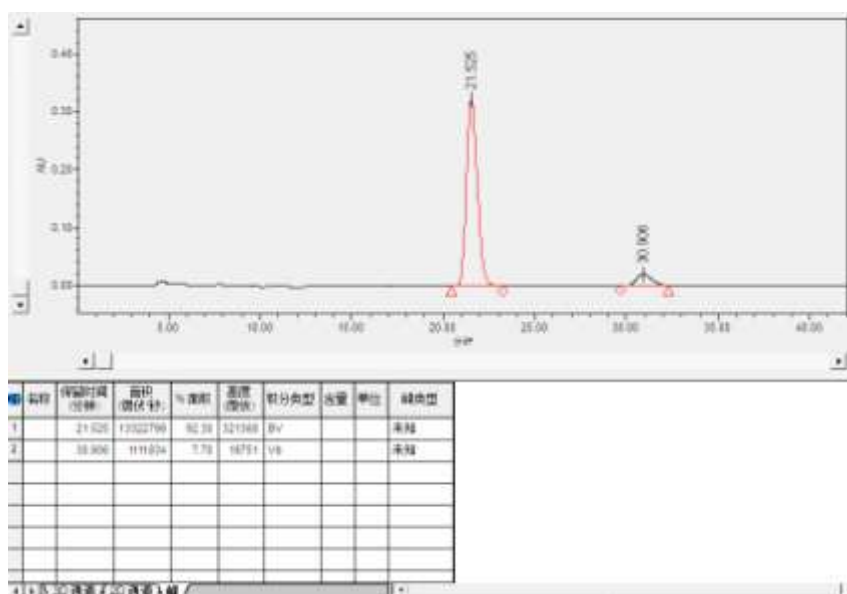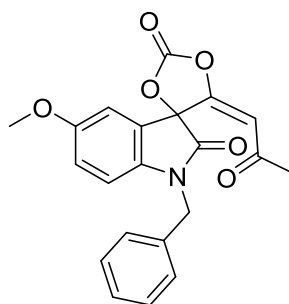

**(*E*)-1-benzyl-5-methoxy-5'-(2-oxopropylidene)spiro[indoline-3,4'-[1,3]dioxolane]-2,2'-dione (2p)**

A white solid, 90% yield (102 mg). M.p.: Decomposition above 60 °C. <sup>1</sup>H NMR (CDCl<sub>3</sub>, TMS, 400

MHz)  $\delta$  2.15 (s, 3H, CH<sub>3</sub>), 3.72 (s, 3H, CH<sub>3</sub>), 4.82 (d,  $J$  = 15.6 Hz, 1H, CH<sub>2</sub>), 5.15 (d,  $J$  = 15.6 Hz, 1H, CH<sub>2</sub>), 6.40 (s, 1H, =CH), 6.65 (d,  $J$  = 8.4 Hz, 1H, ArH), 6.75-6.82 (m, 2H, ArH), 7.28-7.42 (m, 5H, ArH). <sup>13</sup>C NMR (CDCl<sub>3</sub>, TMS, 100 MHz)  $\delta$  31.2, 44.9, 55.8, 86.3, 105.1, 110.6, 110.9, 116.3, 122.2, 127.3, 127.9, 128.9, 134.7, 138.8, 149.3, 156.4, 157.9, 166.5, 195.5. IR (EtOH)  $\nu$  3115, 3063, 2925, 2831, 1847, 1727, 1494, 1435, 1017, 697 cm<sup>-1</sup>. HRMS (DART Positive Ion Mode) Calcd. For C<sub>20</sub>H<sub>18</sub>O<sub>4</sub>N<sup>+1</sup>(M+H-CO<sub>2</sub>)<sup>+</sup> requires 336.1230, Found: 336.1232.  $[\alpha]_D^{25}$  = +35.33 (c 0.05, CH<sub>2</sub>Cl<sub>2</sub>) for 90% *ee*; Enantiomeric excess was determined by HPLC with a Chiralcel AD-H column, Hexane/<sup>i</sup>PrOH = 90/10, 0.7 mL/min, 254 nm,  $t_{minor}$  = 78.960 min,  $t_{major}$  = 56.927 min.

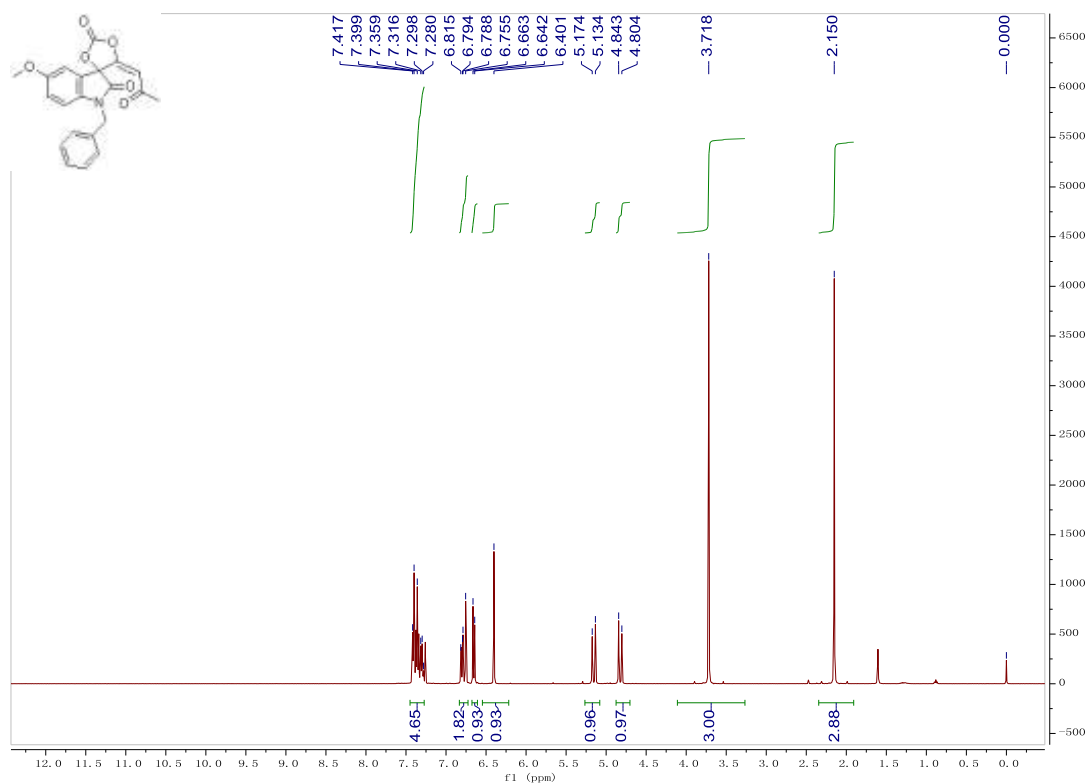

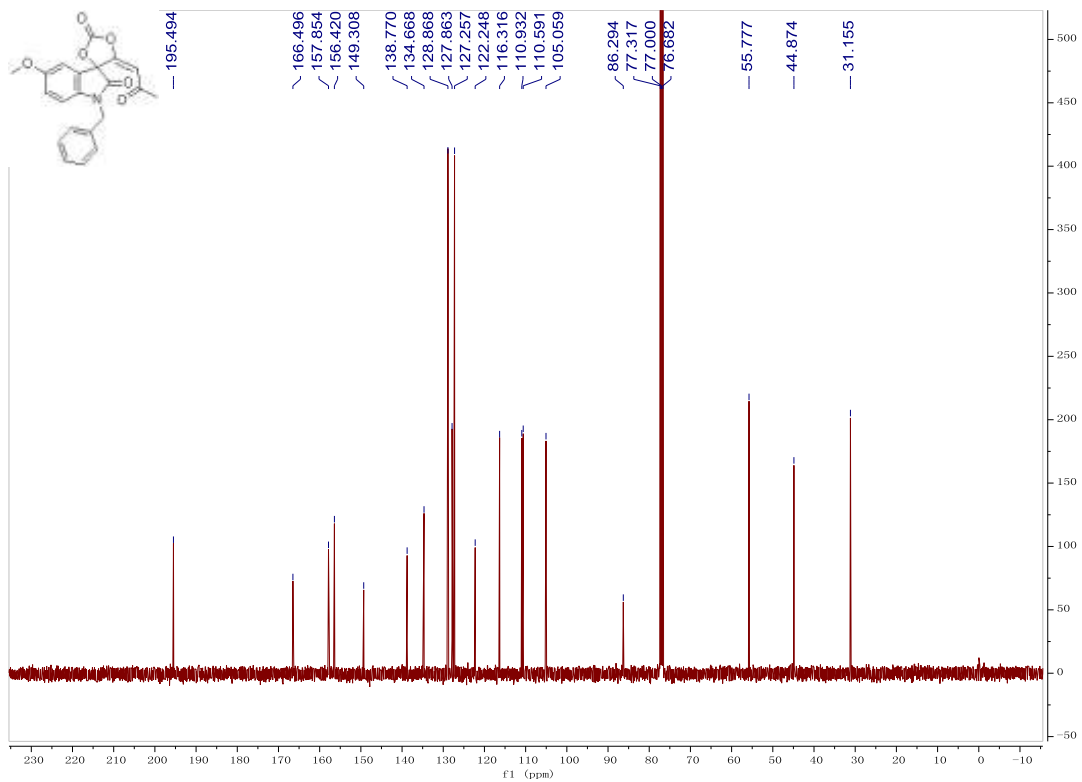

实验时间: 2018-07-16, 19:57:23  
谱图文件: D:\Sun Yaoliang\co2\17-89-A-rac.org

实验者:  
报告时间: 2018-07-16, 19:58:20  
积分方法: 面积归一法

色谱图 (17-89-A-rac.org)

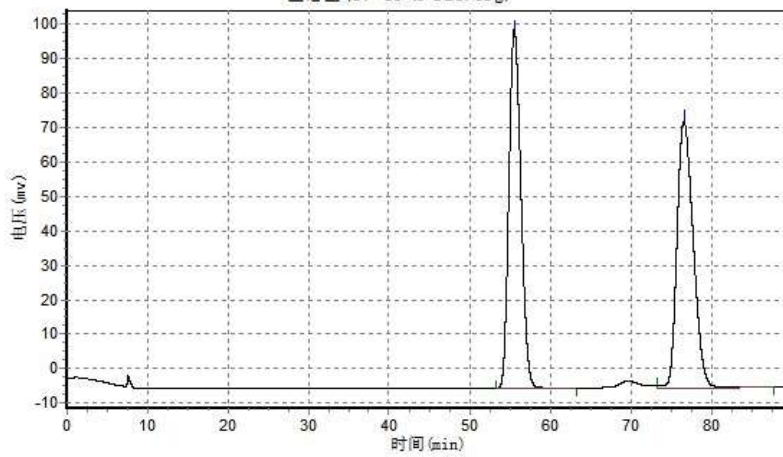

分析结果表

| 峰号 | 峰名 | 保留时间   | 峰高         | 峰面积          | 含量       |
|----|----|--------|------------|--------------|----------|
| 1  |    | 55.548 | 104049.469 | 10812250.000 | 49.9523  |
| 2  |    | 76.615 | 77233.125  | 10832918.000 | 50.0477  |
| 总计 |    |        | 181282.594 | 21645168.000 | 100.0000 |

实验时间: 2019-07-10, 14:17:01  
谱图文件: D:\Sun Yaoliang\co2\17-89-A-asy-re.org

实验者:  
报告时间: 2019-07-10, 20:41:34  
积分方法: 面积归一法

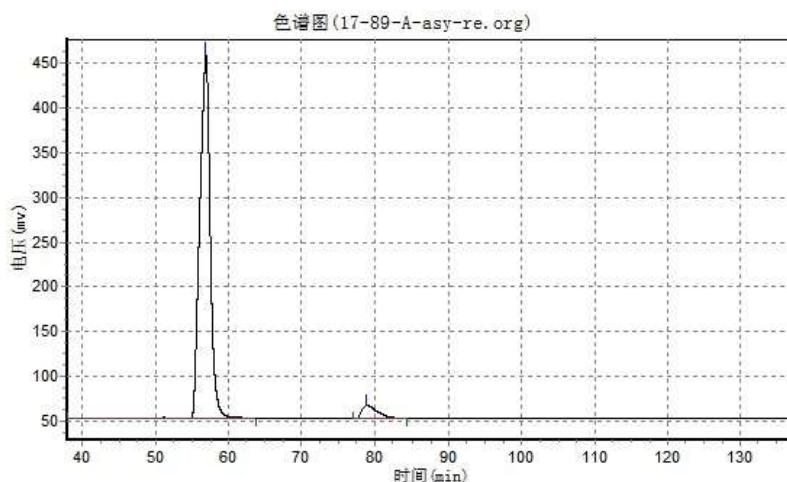

分析结果表

| 峰号 | 峰名 | 保留时间   | 峰高         | 峰面积          | 含量       |
|----|----|--------|------------|--------------|----------|
| 1  |    | 56.927 | 404687.000 | 39617500.000 | 95.2071  |
| 2  |    | 78.960 | 14049.000  | 1994415.875  | 4.7929   |
| 总计 |    |        | 418736.000 | 41611915.875 | 100.0000 |

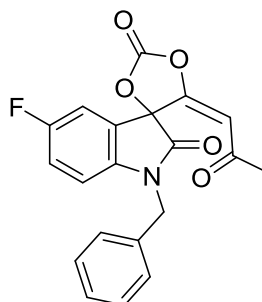

**(E)-1-benzyl-5-fluoro-5'-(2-oxopropylidene)spiro[indoline-3,4'-[1,3]dioxolane]-2,2'-dione (2q)**

A white solid, 83% yield (91 mg). M.p.: Decomposition above 60 °C. <sup>1</sup>H NMR (CDCl<sub>3</sub>, TMS, 400 MHz) δ 2.16 (s, 3H, CH<sub>3</sub>), 4.84 (d, *J* = 16.0 Hz, 1H, CH<sub>2</sub>), 5.17 (d, *J* = 16.0 Hz, 1H, CH<sub>2</sub>), 6.43 (s, 1H, =CH), 6.69 (dd, *J* = 4.8, 8.4 Hz, 1H, ArH), 6.93 (dd, *J* = 2.4, 7.2 Hz, 1H, ArH), 7.00 (dt, *J* = 2.4, 8.8 Hz, 1H, ArH), 7.29-7.41 (m, 5H, ArH). <sup>13</sup>C NMR (CDCl<sub>3</sub>, TMS, 100 MHz) δ 31.2, 44.9, 85.6, 105.3, 110.9 (d, *J* = 7.7 Hz), 111.8 (d, *J* = 25.4 Hz), 118.6 (d, *J* = 23.0 Hz), 122.4 (d, *J* = 8.1 Hz), 127.2, 128.0, 129.0, 134.2, 141.5, 149.0, 157.3, 159.2 (d, *J* = 242.5 Hz), 166.6, 195.7. <sup>19</sup>F NMR (376 MHz, CDCl<sub>3</sub>, CFC1<sub>3</sub>) δ -118.29(-118.22). IR (EtOH) ν 3066, 2922, 2846, 1847, 1734, 1632, 1491, 1455, 1346, 1175, 1015, 735 cm<sup>-1</sup>. HRMS (DART Positive Ion Mode) Calcd. For C<sub>19</sub>H<sub>15</sub>O<sub>3</sub>NF<sup>+</sup>(M+H-CO<sub>2</sub>)<sup>+</sup> requires 324.1030, Found: 324.1029. [α]<sub>D</sub><sup>25</sup> = -11.11 (c 0.06, CH<sub>2</sub>Cl<sub>2</sub>) for 85% *ee*; Enantiomeric excess was determined by HPLC with a Chiralcel AD-H column,

Hexane/*i*PrOH = 90/10, 0.7 mL/min, 254 nm,  $t_{minor} = 72.100$  min,  $t_{major} = 45.505$  min.

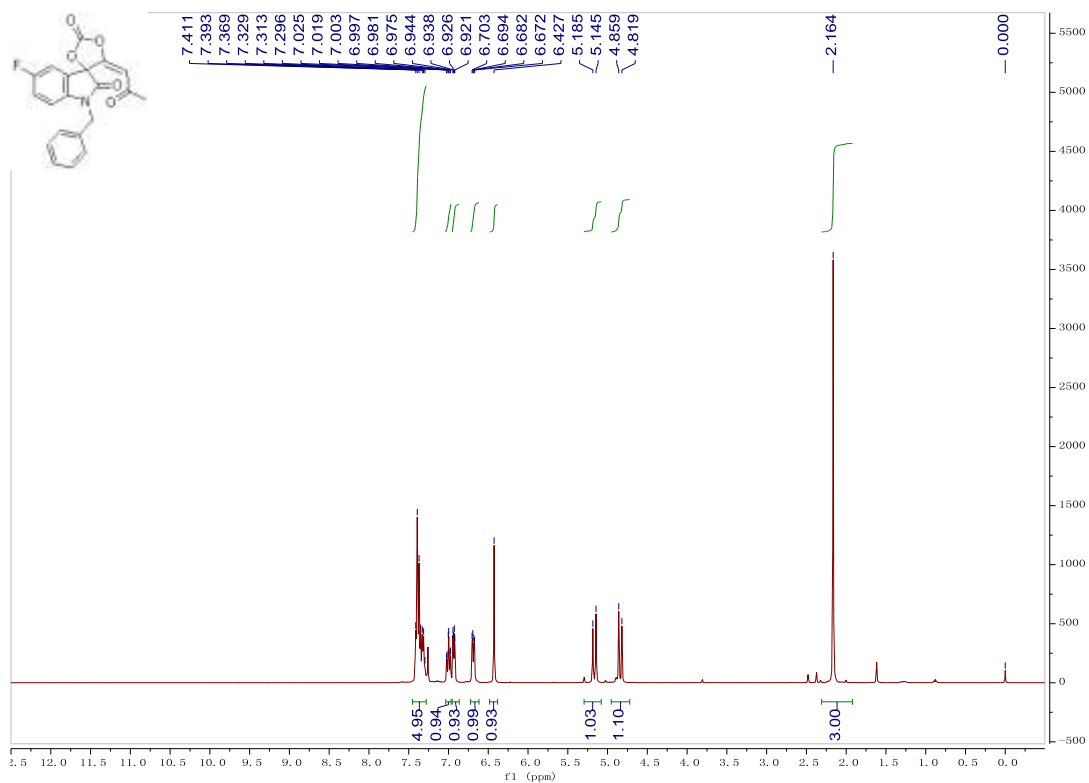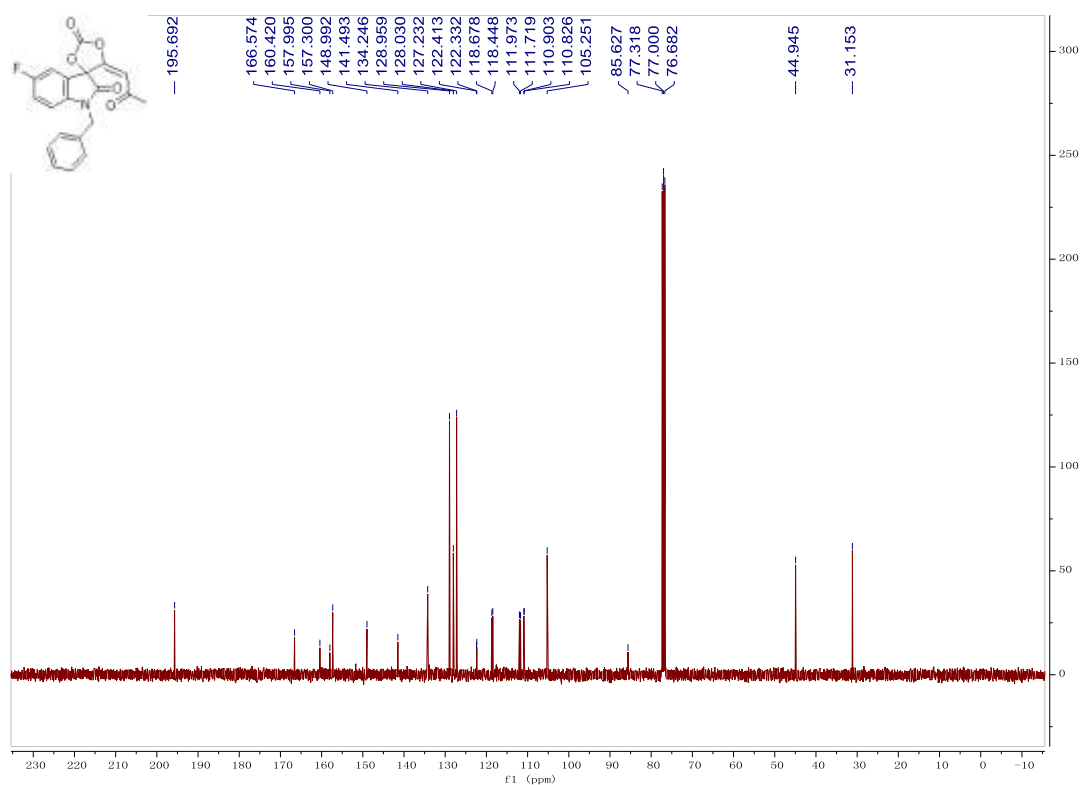



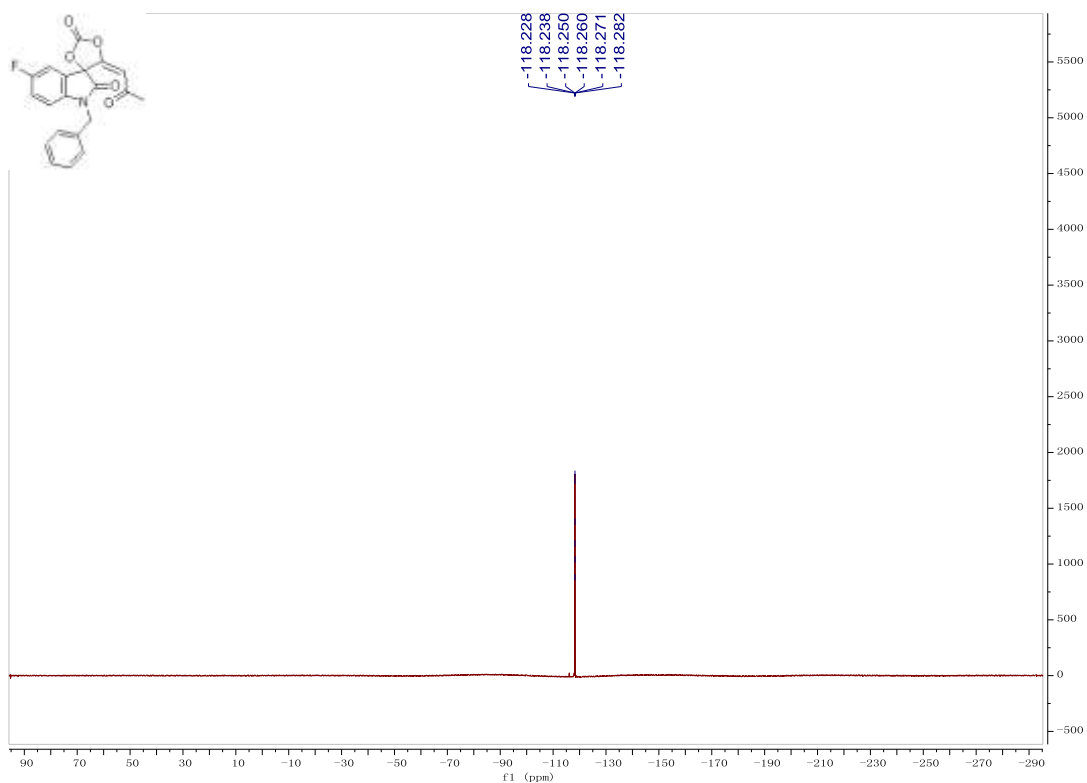

实验时间: 2018-07-22, 18:18:55  
谱图文件: D:\Sun Yaoliang\co2\17-90-A-rac.org

实验者:  
报告时间: 2018-07-16, 20:00:01  
积分方法: 面积归一法

色谱图(17-90-A-rac.org)

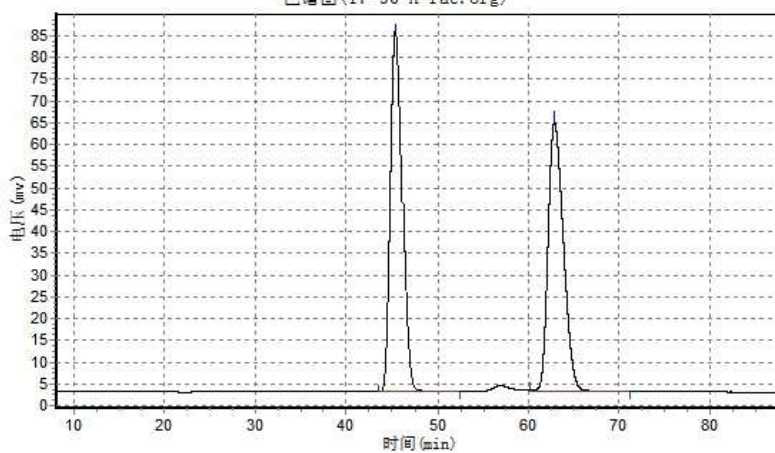

分析结果表

| 峰号 | 峰名 | 保留时间   | 峰高         | 峰面积          | 含量       |
|----|----|--------|------------|--------------|----------|
| 1  |    | 45.565 | 82488.695  | 7205221.000  | 49.8119  |
| 2  |    | 62.898 | 61714.391  | 7259637.500  | 50.1881  |
| 总计 |    |        | 144203.086 | 14464858.500 | 100.0000 |

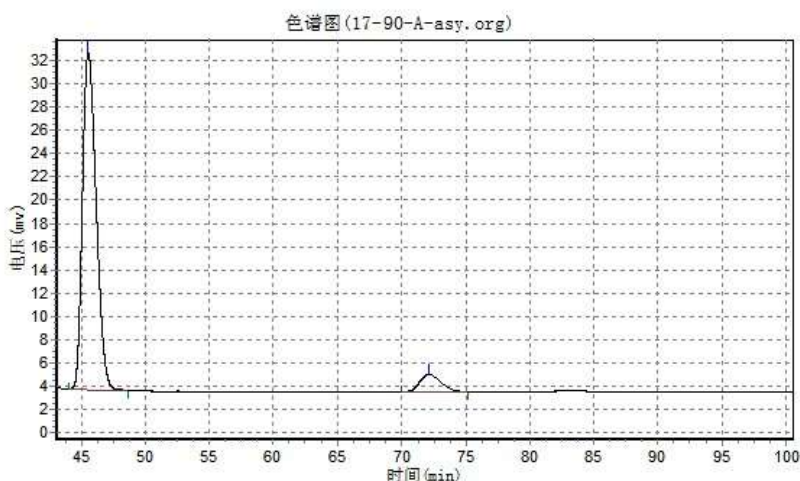

分析结果表

| 峰号 | 峰名 | 保留时间   | 峰高        | 峰面积         | 含量       |
|----|----|--------|-----------|-------------|----------|
| 1  |    | 45.505 | 28902.244 | 2151563.250 | 92.6133  |
| 2  |    | 72.100 | 1505.467  | 171604.688  | 7.3867   |
| 总计 |    |        | 30407.711 | 2323167.938 | 100.0000 |

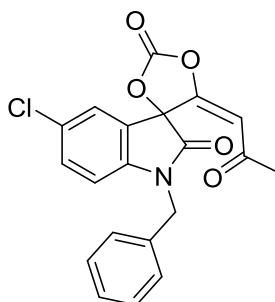

**(E)-1-benzyl-5-chloro-5'-(2-oxopropylidene)spiro[indoline-3,4'-[1,3]dioxolane]-2,2'-dione (2r)**

A white solid, 73% yield (84 mg). M.p.: Decomposition above 60 °C. <sup>1</sup>H NMR (CDCl<sub>3</sub>, TMS, 400 MHz) δ 2.17 (s, 3H, CH<sub>3</sub>), 4.84 (d, *J* = 16.0 Hz, 1H, CH<sub>2</sub>), 5.16 (d, *J* = 16.0 Hz, 1H, CH<sub>2</sub>), 6.43 (s, 1H, =CH), 6.68 (d, *J* = 8.8 Hz, 1H, ArH), 7.15 (d, *J* = 2.0 Hz, 1H, ArH), 7.24-7.41 (m, 6H, ArH). <sup>13</sup>C NMR (CDCl<sub>3</sub>, TMS, 100 MHz) δ 31.2, 44.9, 85.4, 105.2, 111.1, 122.7, 124.1, 127.2, 128.1, 128.9, 129.0, 132.1, 134.1, 144.0, 148.9, 157.2, 166.4, 195.8. IR (EtOH) ν 3120, 3063, 2927, 2852, 1853, 1737, 1705, 1633, 1455, 1324, 1165, 1015, 816 cm<sup>-1</sup>. HRMS (DART Positive Ion Mode) Calcd. For C<sub>19</sub>H<sub>15</sub>O<sub>3</sub>NCl<sup>+</sup>(M+H-CO<sub>2</sub>)<sup>+</sup> requires 340.0740, Found: 340.0741.

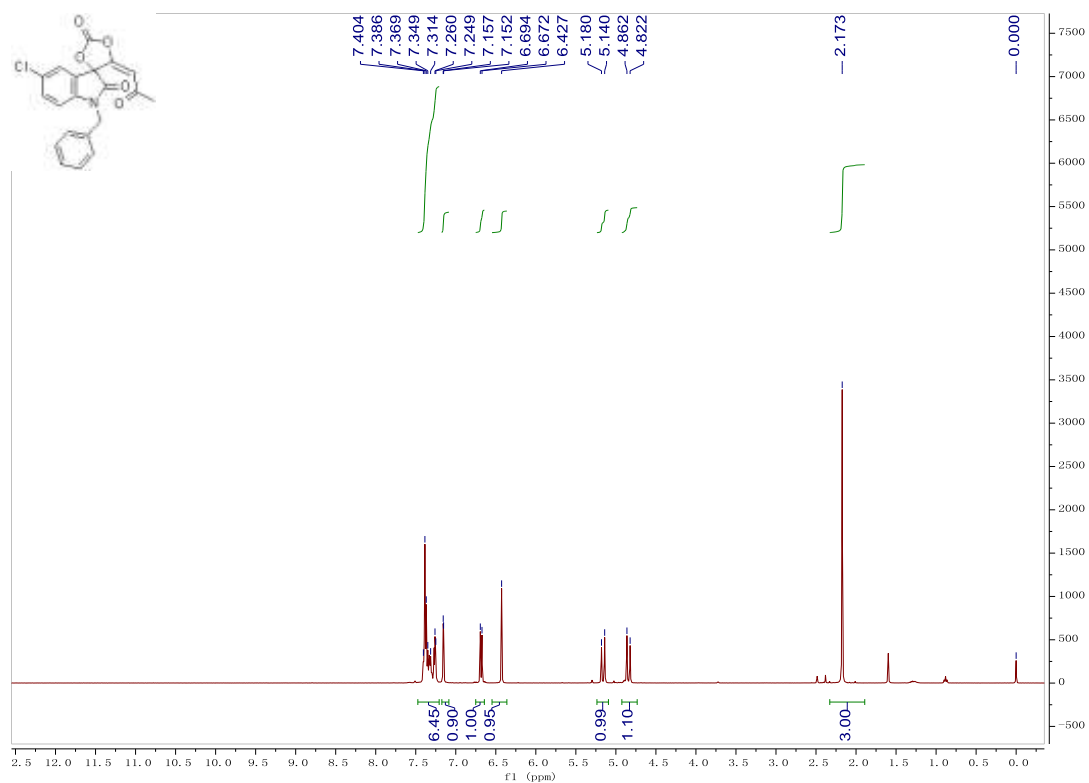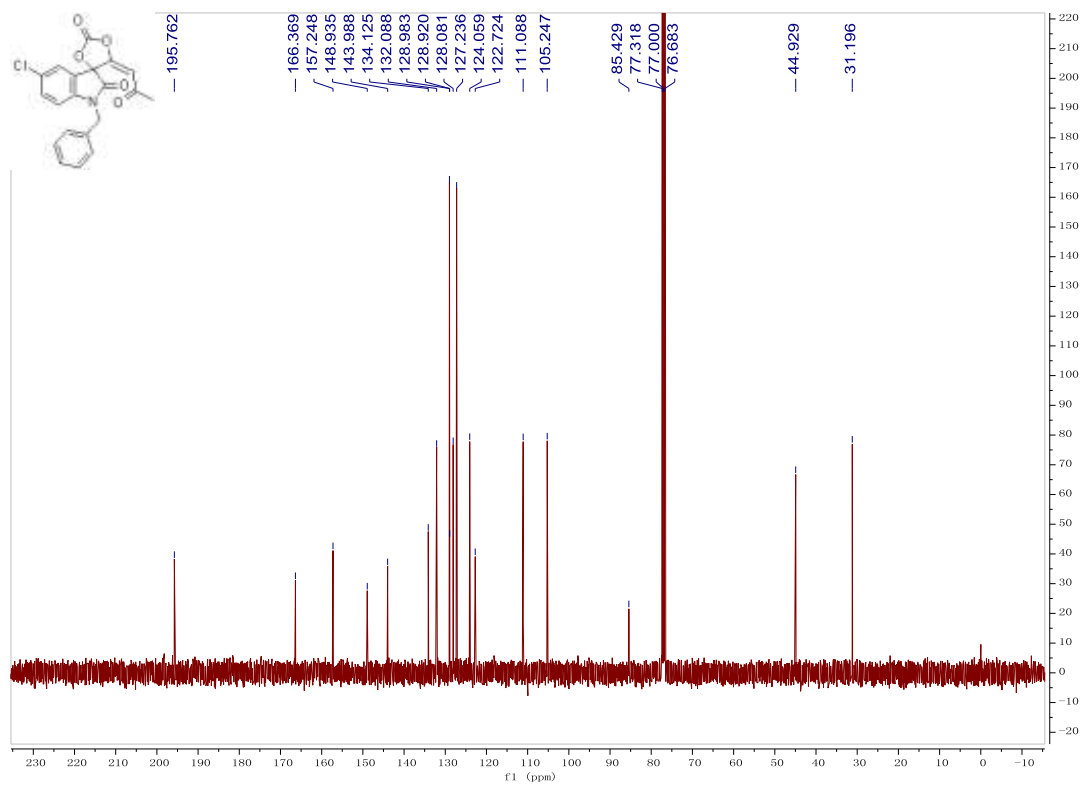

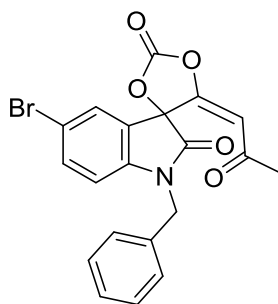

**(E)-1-benzyl-5-bromo-5'-(2-oxopropylidene)spiro[indoline-3,4'-[1,3]dioxolane]-2,2'-dione (2s)**

A white solid, 41% yield (53 mg). M.p.: Decomposition above 60 °C.  $^1\text{H}$  NMR ( $\text{CDCl}_3$ , TMS, 400 MHz)  $\delta$  2.18 (s, 3H,  $\text{CH}_3$ ), 4.84 (d,  $J = 16.0$  Hz, 1H,  $\text{CH}_2$ ), 5.16 (d,  $J = 16.0$  Hz, 1H,  $\text{CH}_2$ ), 6.43 (s, 1H, =CH), 6.64 (d,  $J = 8.4$  Hz, 1H, ArH), 7.27-7.43 (m, 7H, ArH).  $^{13}\text{C}$  NMR ( $\text{CDCl}_3$ , TMS, 100 MHz)  $\delta$  31.2, 44.9, 85.4, 105.3, 111.6, 116.0, 123.1, 126.8, 127.3, 128.1, 129.0, 134.1, 135.0, 144.5, 148.9, 157.3, 166.3, 195.8. IR (EtOH)  $\nu$  3110, 3066, 2919, 2844, 1852, 1704, 1632, 1603, 1482, 1131, 933, 813  $\text{cm}^{-1}$ . HRMS (DART Positive Ion Mode) Calcd. For  $\text{C}_{19}\text{H}_{15}\text{O}_3\text{NBr}^+(\text{M}+\text{H}-\text{CO}_2)^+$  requires 384.0230, Found: 384.0228.  $[\delta]_D^{25} = +40.00$  (c 0.04,  $\text{CH}_2\text{Cl}_2$ ) for 80% *ee*; Enantiomeric excess was determined by HPLC with a Chiralcel AD-H column, Hexane/ $i$ PrOH = 90/10, 0.7 mL/min, 254 nm,  $t_{\text{minor}} = 30.820$  min,  $t_{\text{major}} = 23.585$  min.

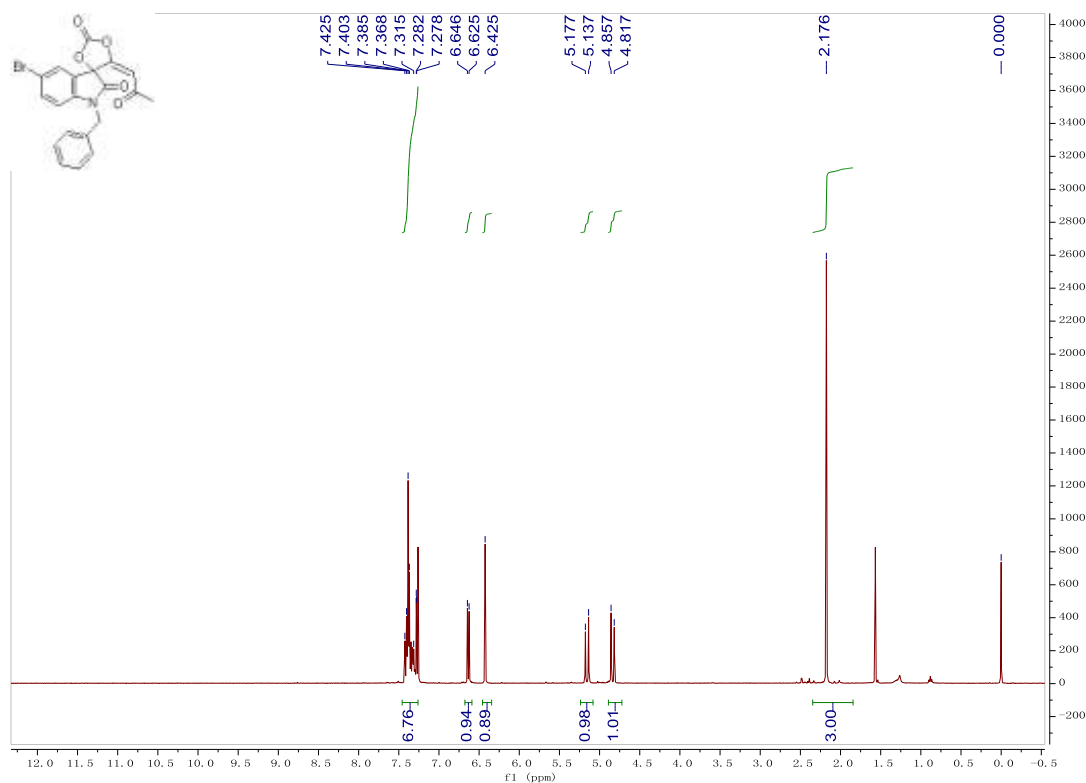

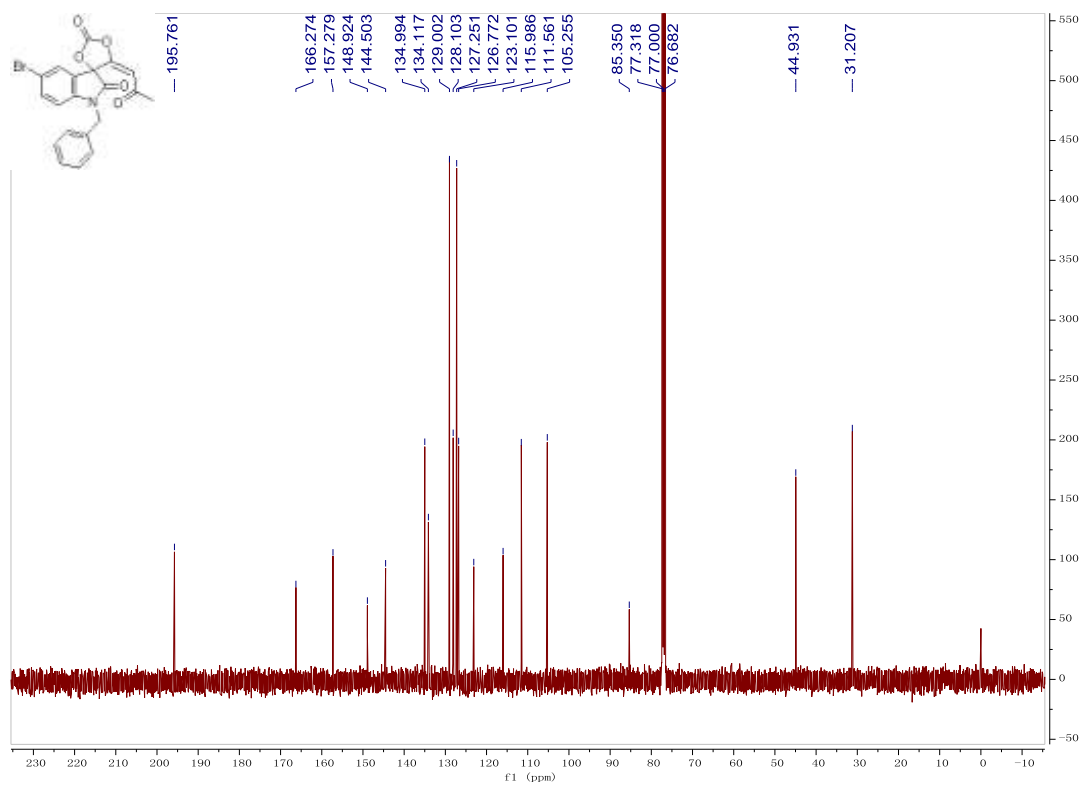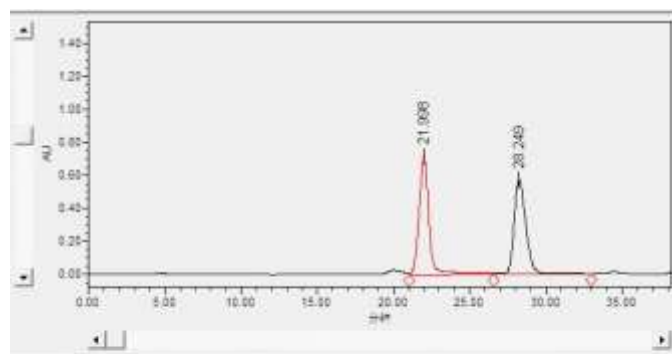

| 名称 | 保留时间<br>(分钟) | 面积<br>(平方秒) | %面积   | 高度<br>(谱法) | 积分类型 | 含量 | 单位 | 峰类型 | 峰代码 |
|----|--------------|-------------|-------|------------|------|----|----|-----|-----|
| 1  | 21.998       | 33123838    | 50.62 | 721031     | VV   |    |    | 未知  |     |
| 2  | 28.245       | 32313022    | 48.38 | 576064     | VV   |    |    | 未知  |     |
|    |              |             |       |            |      |    |    |     |     |
|    |              |             |       |            |      |    |    |     |     |
|    |              |             |       |            |      |    |    |     |     |
|    |              |             |       |            |      |    |    |     |     |
|    |              |             |       |            |      |    |    |     |     |
|    |              |             |       |            |      |    |    |     |     |
|    |              |             |       |            |      |    |    |     |     |

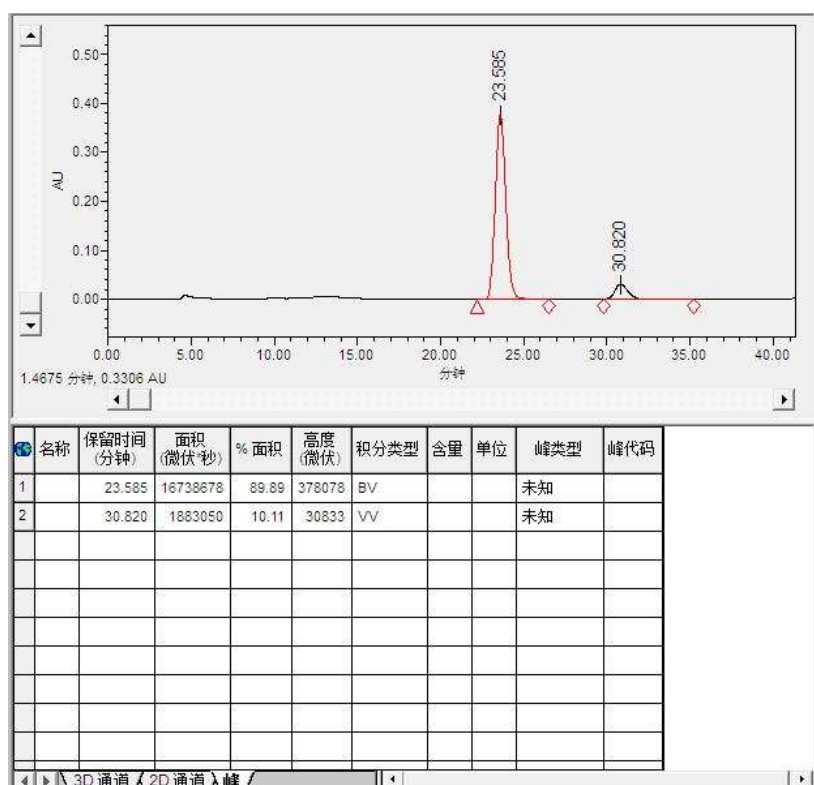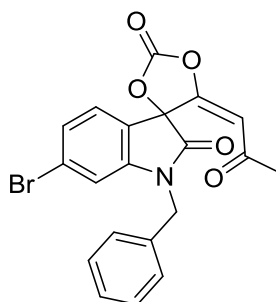

**(E)-1-benzyl-6-bromo-5'-(2-oxopropylidene)spiro[indoline-3,4'-[1,3]dioxolane]-2,2'-dione (2t)**

A white solid, 67% yield (86 mg). M.p.: Decomposition above 60 °C. <sup>1</sup>H NMR (CDCl<sub>3</sub>, TMS, 400 MHz) δ 2.16 (s, 3H, CH<sub>3</sub>), 4.81 (d, *J* = 16.0 Hz, 1H, CH<sub>2</sub>), 5.15 (d, *J* = 16.0 Hz, 1H, CH<sub>2</sub>), 6.41 (s, 1H, =CH), 6.92 (s, 1H, ArH), 7.03 (d, *J* = 8.0 Hz, 1H, ArH), 7.18 (d, *J* = 7.6 Hz, 1H, ArH), 7.33-7.40 (m, 5H, ArH). <sup>13</sup>C NMR (CDCl<sub>3</sub>, TMS, 100 MHz) δ 31.2, 44.9, 85.4, 105.1, 113.5, 120.2, 124.7, 126.3, 126.5, 127.2, 128.2, 129.0, 134.0, 146.7, 149.0, 157.4, 166.7, 195.7. IR (EtOH) ν 3112, 3071, 3026, 2922, 2846, 1844, 1734, 1734, 1486, 1323, 1121, 987 cm<sup>-1</sup>. HRMS (DART Positive Ion Mode) Calcd. For C<sub>19</sub>H<sub>15</sub>O<sub>3</sub>NBr<sup>+1</sup>(M+H-CO<sub>2</sub>)<sup>+</sup> requires 384.0230, Found: 384.0230.

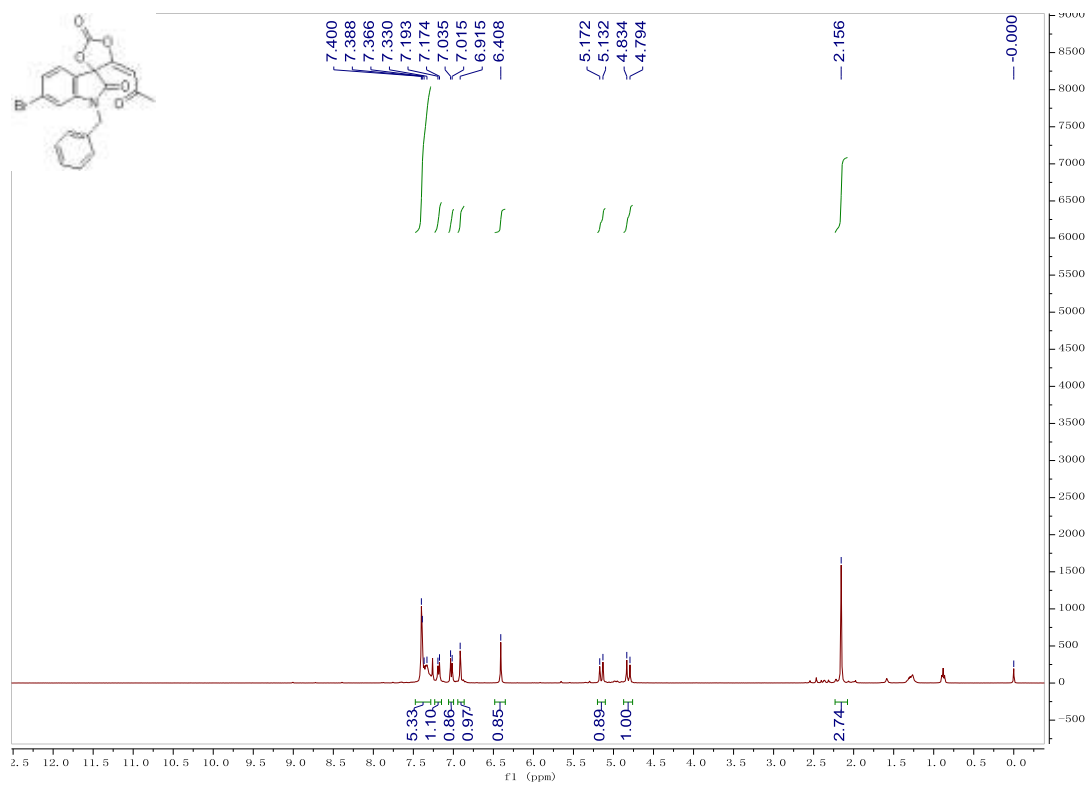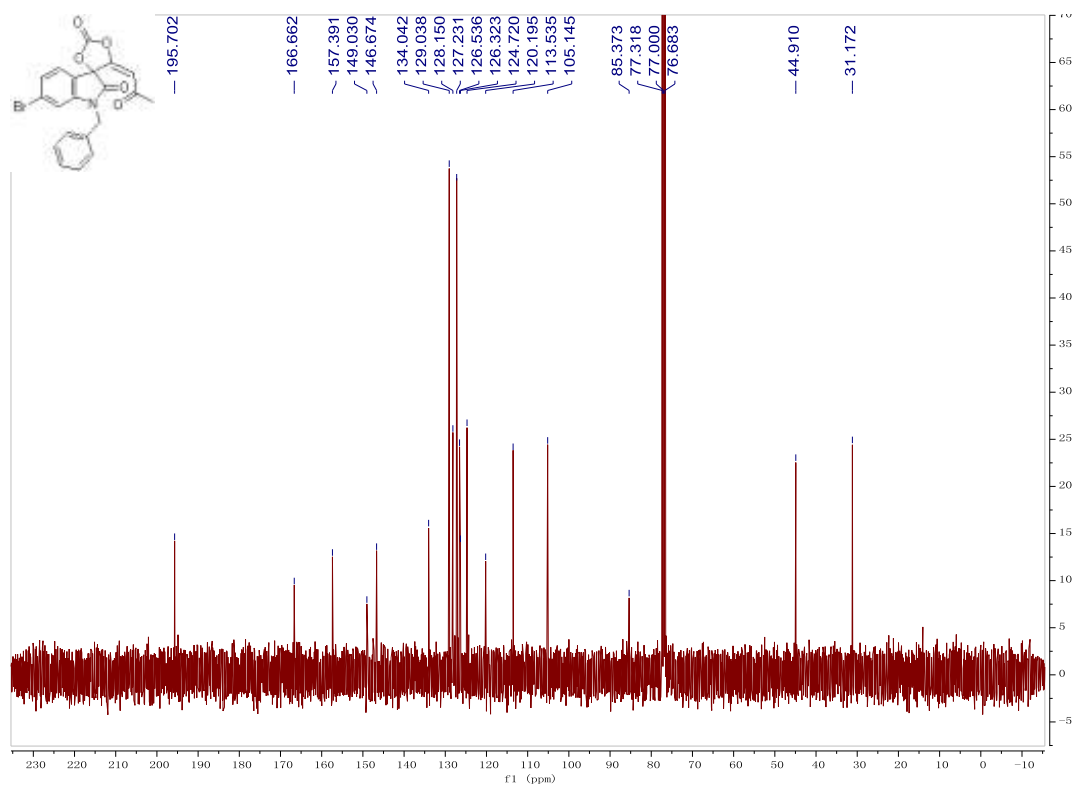

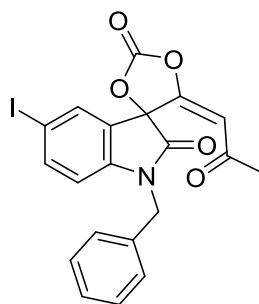

**(*E*)-1-benzyl-5-iodo-5'-(2-oxopropylidene)spiro[indoline-3,4'-[1,3]dioxolane]-2,2'-dione (2u)**

A white solid, 72% yield (103 mg). M.p.: Decomposition above 60 °C.  $^1\text{H}$  NMR ( $\text{CDCl}_3$ , TMS, 400 MHz)  $\delta$  2.18 (s, 3H,  $\text{CH}_3$ ), 4.83 (d,  $J = 16.0$  Hz, 1H,  $\text{CH}_2$ ), 5.15 (d,  $J = 16.0$  Hz, 1H,  $\text{CH}_2$ ), 6.42 (s, 1H, =CH), 6.53 (d,  $J = 8.4$  Hz, 1H, ArH), 7.27-7.40 (m, 5H, ArH), 7.43 (d,  $J = 1.6$  Hz, 1H, ArH), 7.60 (dd,  $J = 2.0, 7.6$  Hz, 1H, ArH).  $^{13}\text{C}$  NMR ( $\text{CDCl}_3$ , TMS, 100 MHz)  $\delta$  31.3, 44.9, 85.2, 85.6, 105.3, 112.1, 123.4, 127.3, 128.1, 129.0, 132.3, 134.1, 140.9, 145.2, 149.0, 157.3, 166.1, 195.8. IR (EtOH)  $\nu$  3110, 3058, 3029, 2919, 2844, 1855, 1734, 1601, 1454, 1323, 1131, 1015, 811, 735, 696  $\text{cm}^{-1}$ . HRMS (DART Positive Ion Mode) Calcd. For  $\text{C}_{19}\text{H}_{15}\text{O}_3\text{NI}^+ (\text{M}+\text{H}-\text{CO}_2)^+$  requires 432.0091, Found: 432.0106.

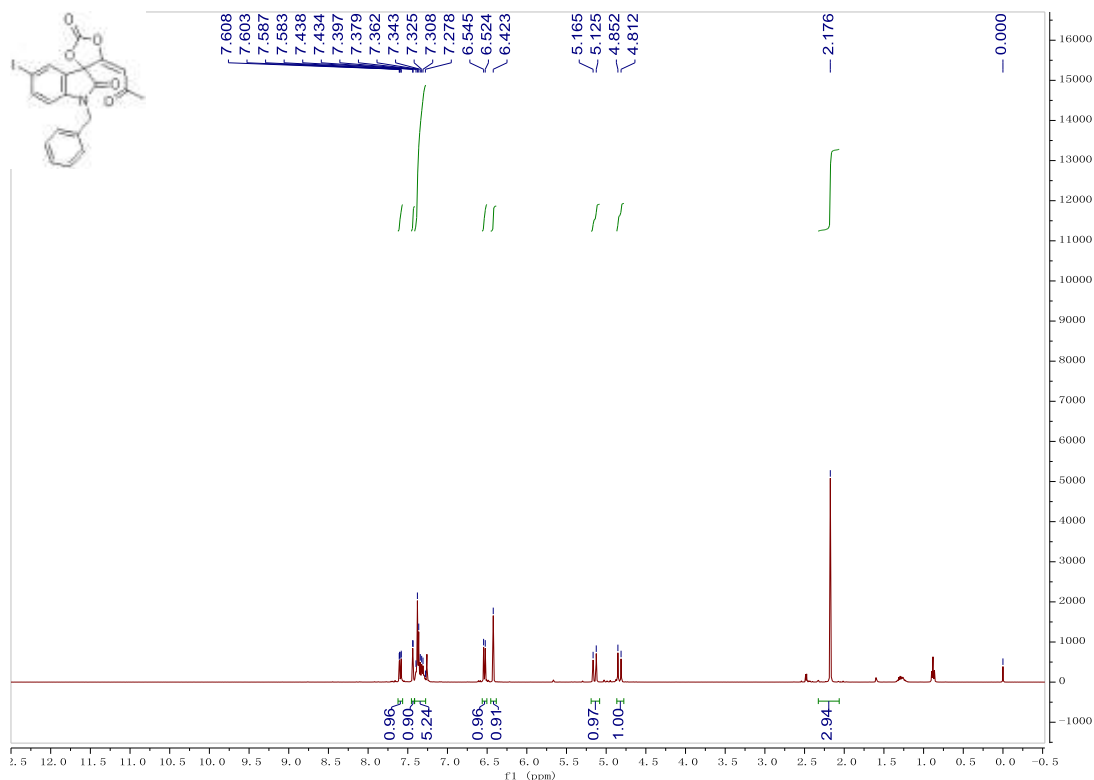



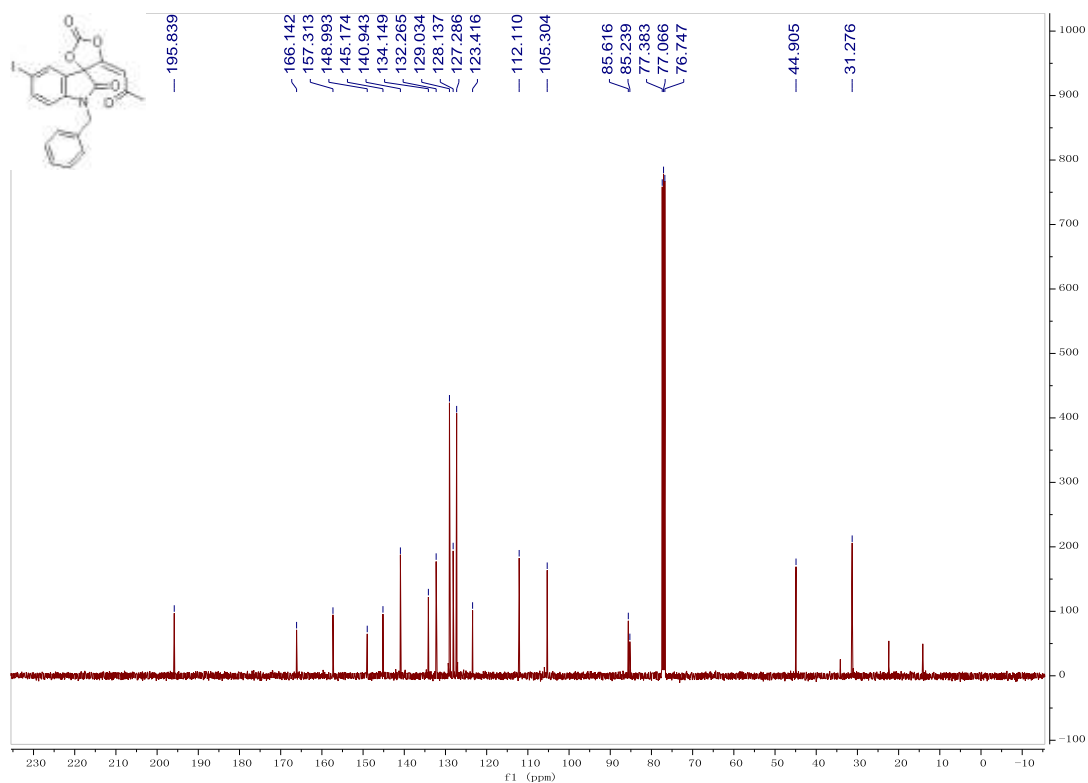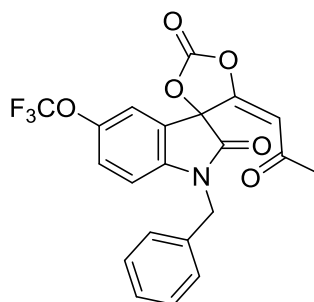

**(*E*)-1-benzyl-5'-(2-oxopropylidene)-5-(trifluoromethoxy)spiro[indoline-3,4'-[1,3]dioxolane]-2,2'-dione (2v)**

A white solid, 79% yield (103 mg). M.p.: Decomposition above 60 °C.  $^1\text{H}$  NMR ( $\text{CDCl}_3$ , TMS, 400 MHz)  $\delta$  2.16 (s, 3H,  $\text{CH}_3$ ), 4.85 (d,  $J = 16.0$  Hz, 1H,  $\text{CH}_2$ ), 5.18 (d,  $J = 16.0$  Hz, 1H,  $\text{CH}_2$ ), 6.44 (s, 1H, =CH), 6.76 (d,  $J = 8.4$  Hz, 1H, ArH), 7.06 (s, 1H, ArH), 7.17 (d,  $J = 8.4$  Hz, 1H, ArH), 7.30-7.42 (m, 5H, ArH).  $^{13}\text{C}$  NMR ( $\text{CDCl}_3$ , TMS, 100 MHz)  $\delta$  31.1, 45.0, 85.3, 105.4, 110.7, 117.6, 120.3 (q,  $J = 256.0$  Hz), 122.5, 125.3, 127.3, 128.2, 129.0, 134.1, 144.1, 145.0 (q,  $J = 2.2$  Hz), 148.9, 157.1, 166.6, 195.8.  $^{19}\text{F}$  NMR (376 MHz,  $\text{CDCl}_3$ ,  $\text{CFCl}_3$ )  $\delta$  -58.45. IR (EtOH)  $\nu$  2922, 2844, 1852, 1742, 1708, 1608, 1492, 1455, 1323, 1256, 1162  $\text{cm}^{-1}$ . HRMS (DART Positive Ion Mode) Calcd. For  $\text{C}_{20}\text{H}_{15}\text{O}_4\text{NF}_3^{+1}(\text{M}+\text{H}-\text{CO}_2)^+$  requires 390.0948, Found: 390.0946.  $[\alpha]_D^{25} = -17.78$  (c 0.06,  $\text{CH}_2\text{Cl}_2$ ) for 86% *ee*; Enantiomeric excess was determined by HPLC with a Chiralcel AD-H

column, Hexane/*i*PrOH = 90/10, 0.7 mL/min, 254 nm,  $t_{minor} = 21.102$  min,  $t_{major} = 16.747$  min.

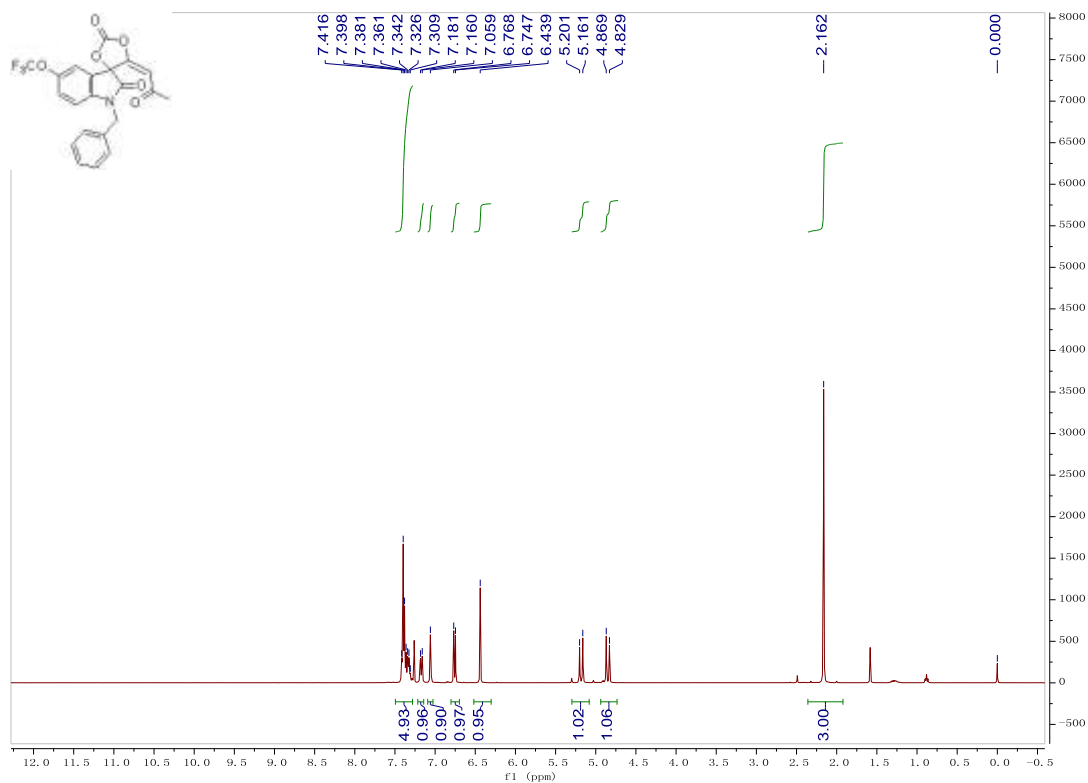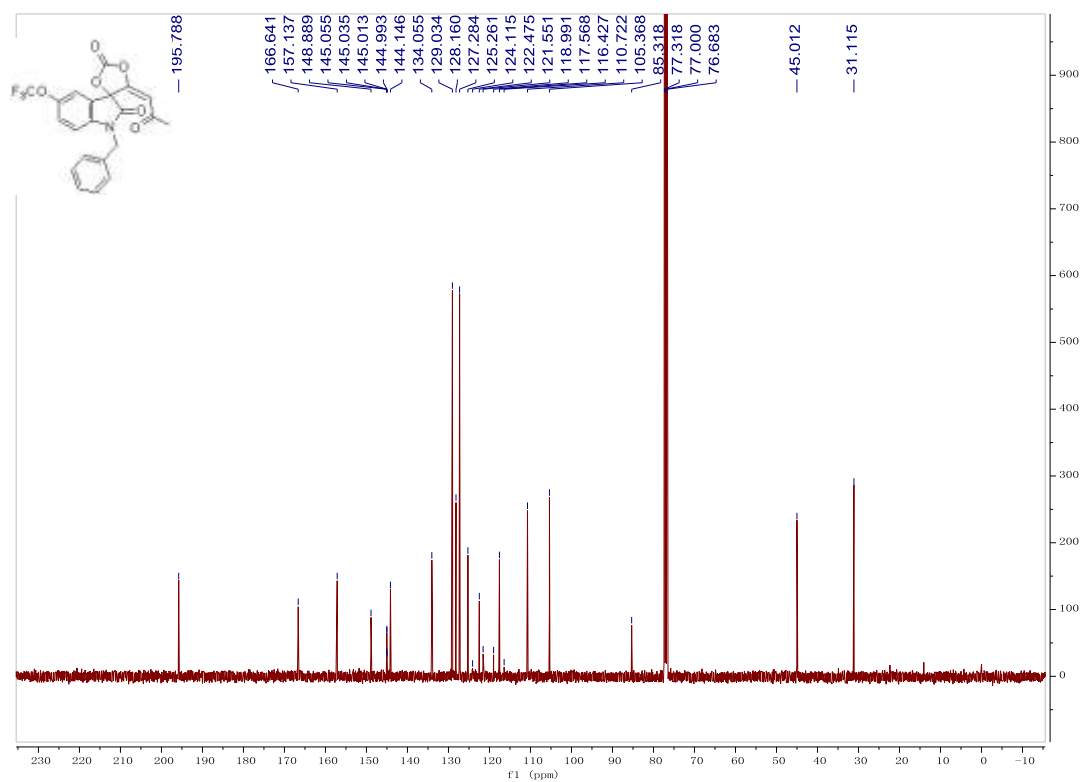

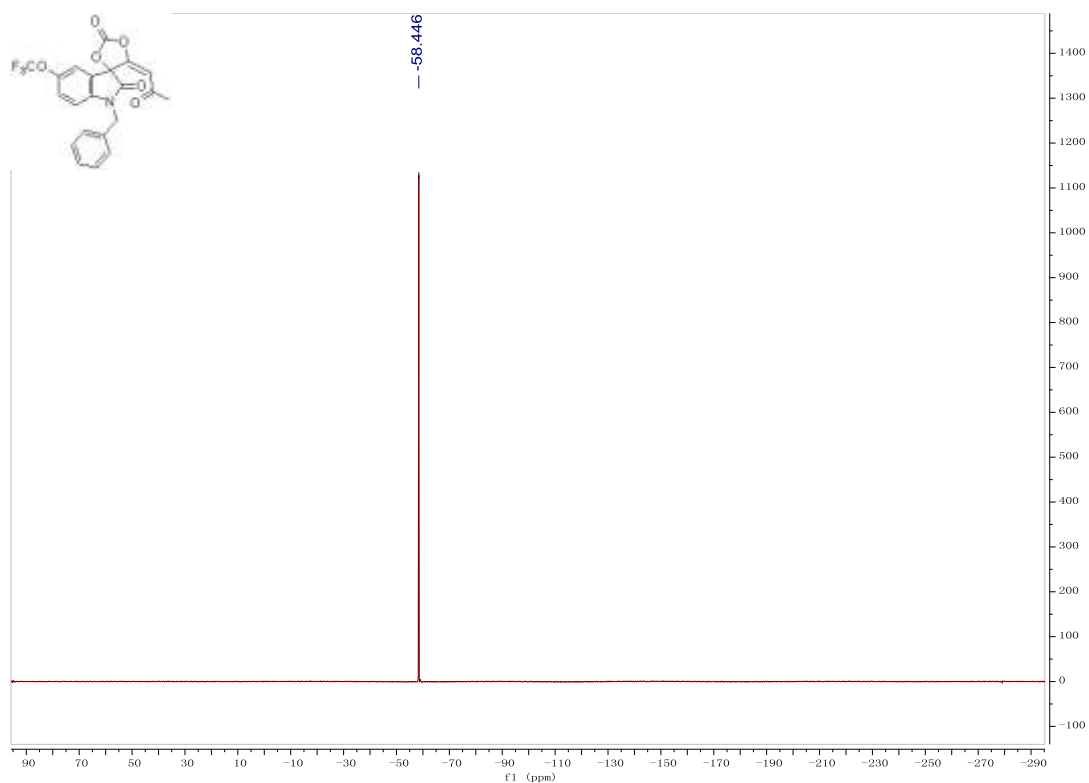

实验时间: 2019-07-18, 20:28:01  
谱图文件: D:\Sun Yaoliang\co2\17-96-a-rac.org

实验者:  
报告时间: 2019-07-18, 20:29:42  
积分方法: 面积归一法

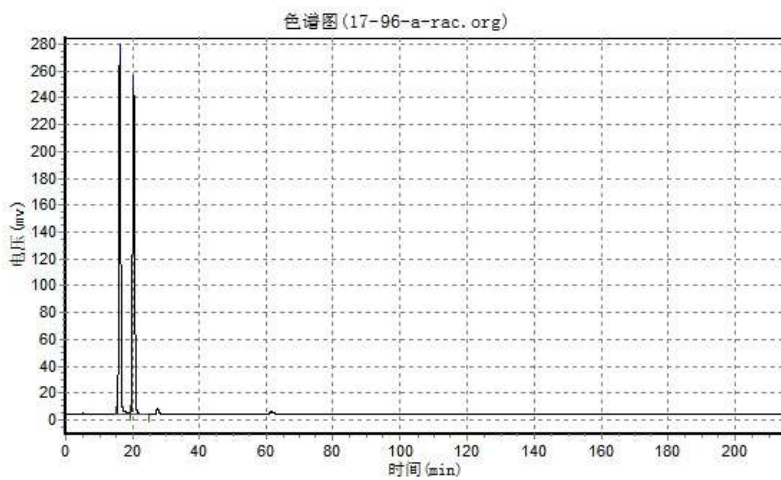

分析结果表

| 峰号 | 峰名 | 保留时间   | 峰高         | 峰面积          | 含量       |
|----|----|--------|------------|--------------|----------|
| 1  |    | 16.182 | 267018.156 | 11032892.000 | 50.2948  |
| 2  |    | 20.348 | 244204.922 | 10903556.000 | 49.7052  |
| 总计 |    |        | 511223.078 | 21936448.000 | 100.0000 |

实验时间: 2019-07-18, 14:11:10  
谱图文件: D:\Sun Yaoliang\co2\17-96-a-asy.org

实验者:  
报告时间: 2019-07-18, 14:16:00  
积分方法: 面积归一法

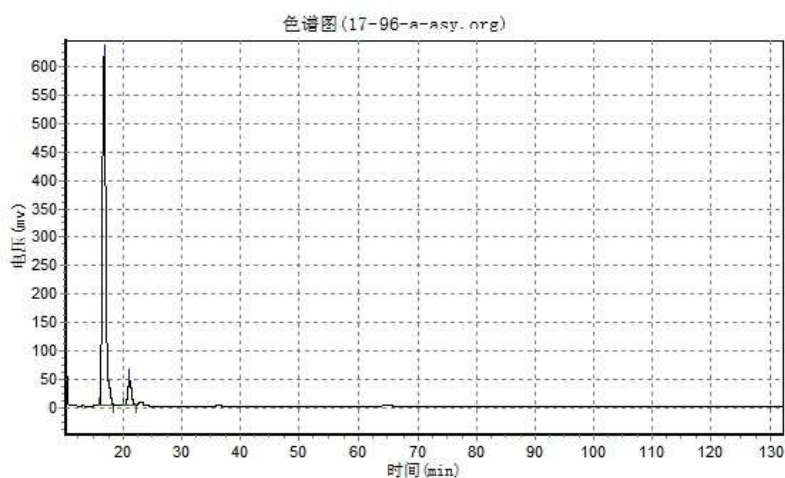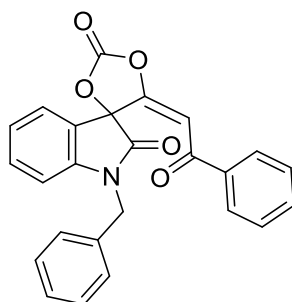

**(E)-1-benzyl-5'-(2-oxo-2-phenylethylidene)spiro[indoline-3,4'-[1,3]dioxolane]-2,2'-dione (2w)**

A white solid, 44% yield (54 mg). M.p.: Decomposition above 60 °C. <sup>1</sup>H NMR (CDCl<sub>3</sub>, TMS, 400 MHz) δ 5.01 (d, *J* = 16.0 Hz, 1H, CH<sub>2</sub>), 5.14 (d, *J* = 16.0 Hz, 1H, CH<sub>2</sub>), 6.80 (d, *J* = 8.0 Hz, 1H, ArH), 7.00 (t, *J* = 7.6 Hz, 1H, ArH), 7.15 (s, 1H, =CH), 7.19 (d, *J* = 7.2 Hz, 1H, ArH), 7.25-7.45 (m, 6H, ArH), 7.49-7.55 (m, 3H, ArH), 7.74-7.77 (m, 2H, ArH). <sup>13</sup>C NMR (CDCl<sub>3</sub>, TMS, 100 MHz) δ 44.9, 86.3, 101.9, 110.1, 121.4, 123.5, 123.6, 127.5, 127.9, 128.1, 128.7, 128.8, 132.2, 133.6, 134.7, 136.6, 145.6, 149.4, 159.5, 167.0, 187.4. IR (EtOH) ν 3081, 3055, 2959, 1899, 1850, 1742, 1611, 1466, 1356, 1182, 1004 cm<sup>-1</sup>. HRMS (DART Positive Ion Mode) Calcd. For C<sub>24</sub>H<sub>21</sub>O<sub>3</sub>N<sub>2</sub><sup>+</sup>(M+NH<sub>4</sub>-CO<sub>2</sub>)<sup>+</sup> requires 385.1450, Found: 385.1450.

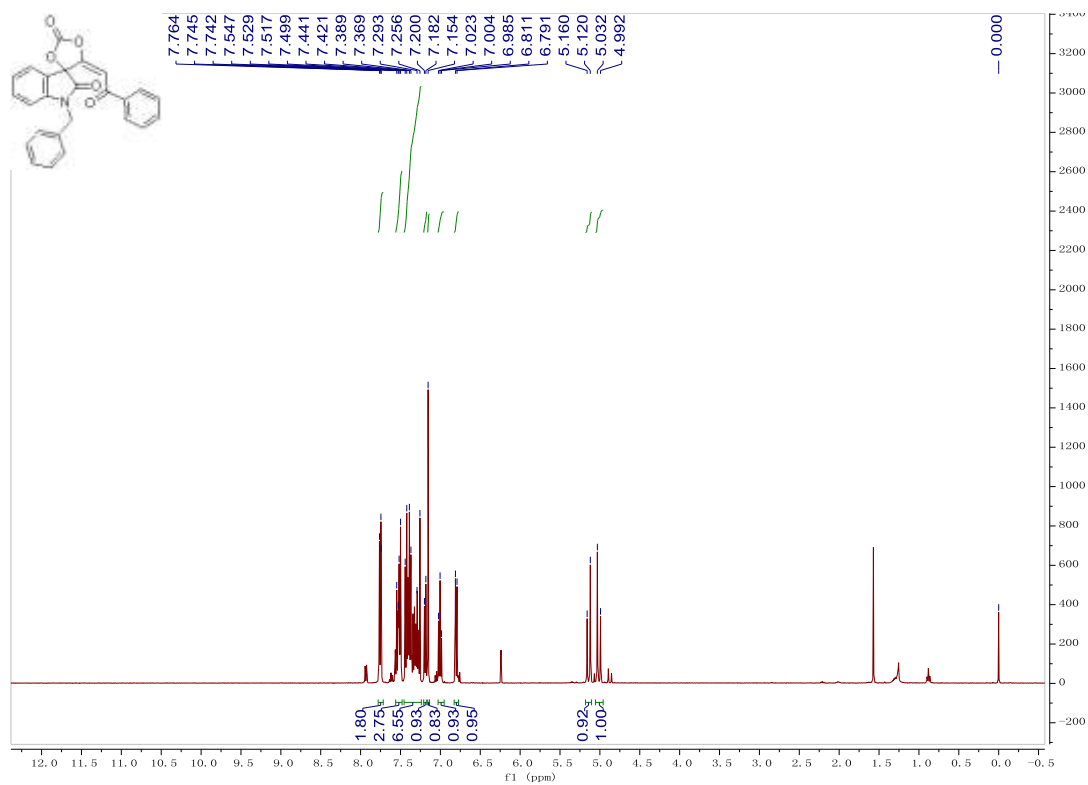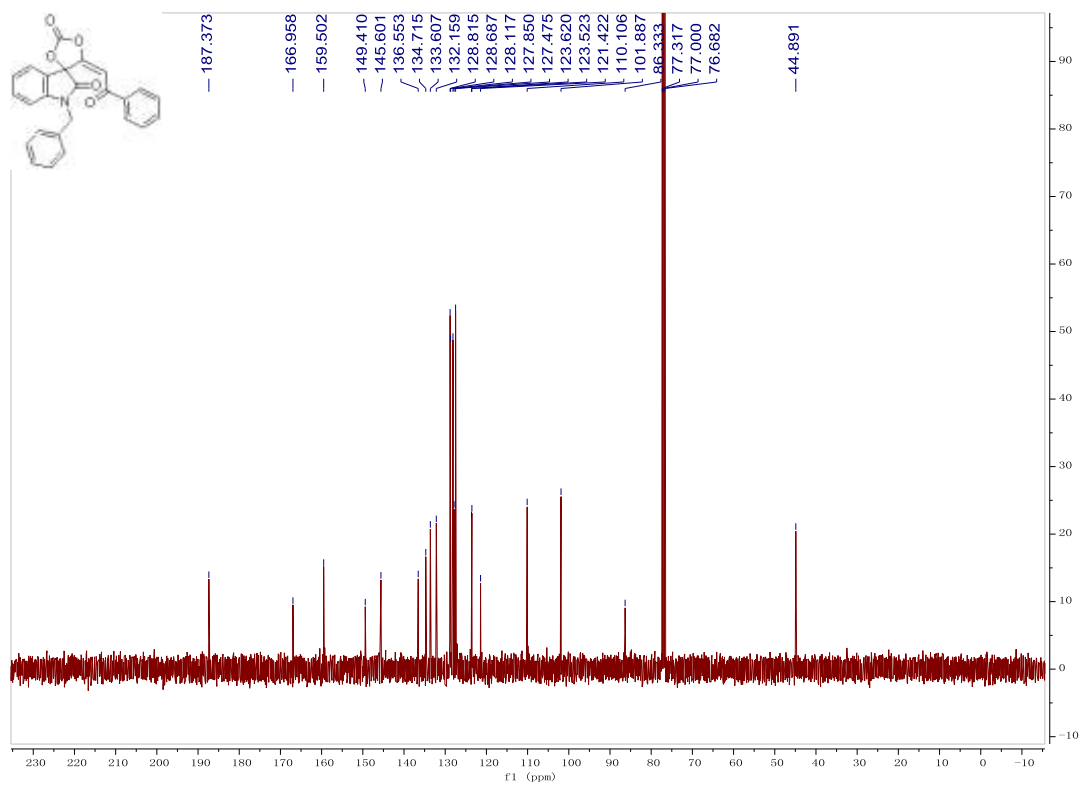

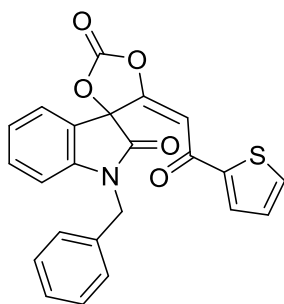

**(E)-1-benzyl-5'-(2-oxo-2-(thiophen-2-yl)ethylidene)spiro[indoline-3,4'-[1,3]dioxolane]-2,2'-dione (2x)**

A white solid, 56% yield (70 mg). M.p.: Decomposition above 60 °C.  $^1\text{H}$  NMR ( $\text{CDCl}_3$ , TMS, 400 MHz)  $\delta$  4.99 (d,  $J = 16.0$  Hz, 1H,  $\text{CH}_2$ ), 5.12 (d,  $J = 16.0$  Hz, 1H,  $\text{CH}_2$ ), 6.79 (d,  $J = 8.0$  Hz, 1H, ArH), 6.98 (s, 1H, =CH), 6.99-7.04 (m, 2H, ArH), 7.11 (t,  $J = 4.4$  Hz, 1H, ArH), 7.20 (dd,  $J = 0.4$ , 7.2 Hz, 1H, ArH), 7.27-7.34 (m, 2H, ArH), 7.36-7.40 (m, 2H, ArH), 7.48 (d,  $J = 7.2$  Hz, 2H, ArH), 7.64 (d,  $J = 4.4$  Hz, 2H, ArH).  $^{13}\text{C}$  NMR ( $\text{CDCl}_3$ , TMS, 100 MHz)  $\delta$  44.9, 86.2, 102.4, 110.2, 121.7, 123.5, 123.7, 127.4, 127.8, 128.4, 128.8, 132.2, 132.3, 134.7, 135.0, 144.1, 145.5, 149.4, 158.8, 166.9, 179.5. IR (EtOH)  $\nu$  3102, 3089, 2919, 1728, 1693, 1579, 1466, 1340, 1109, 971, 835, 732  $\text{cm}^{-1}$ . HRMS (DART Positive Ion Mode) Calcd. For  $\text{C}_{22}\text{H}_{16}\text{O}_3\text{NS}^+ (\text{M}+\text{H}-\text{CO}_2)^+$  requires 374.0845, Found: 374.0845.

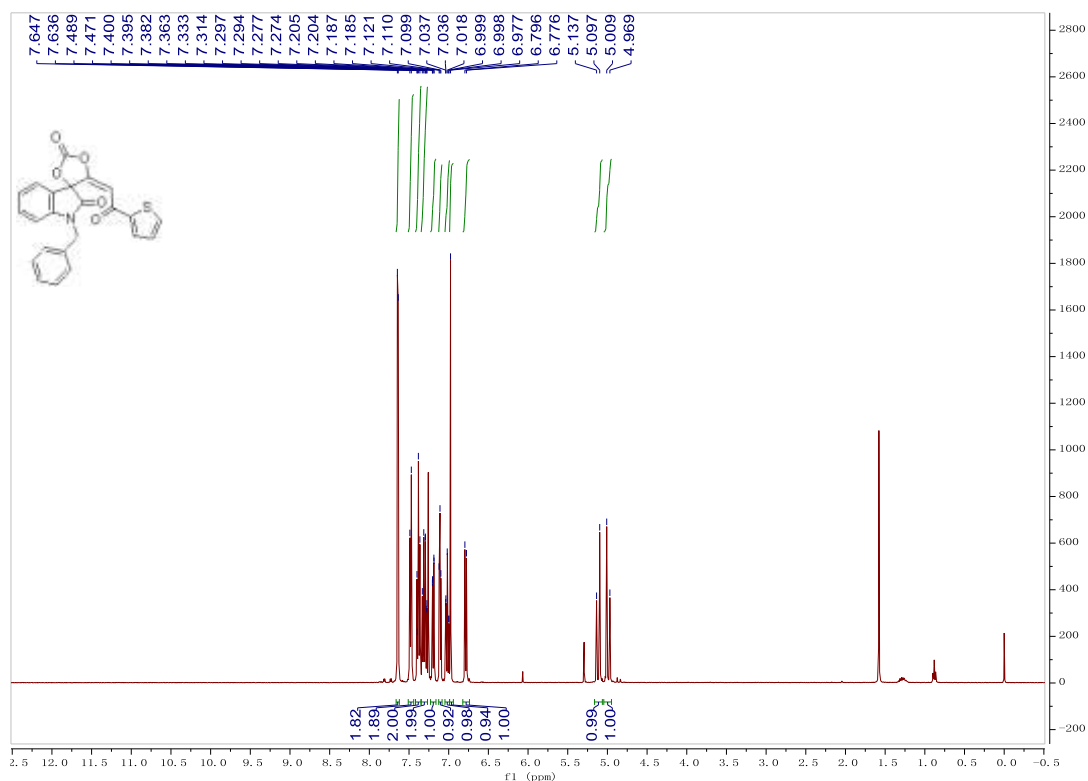

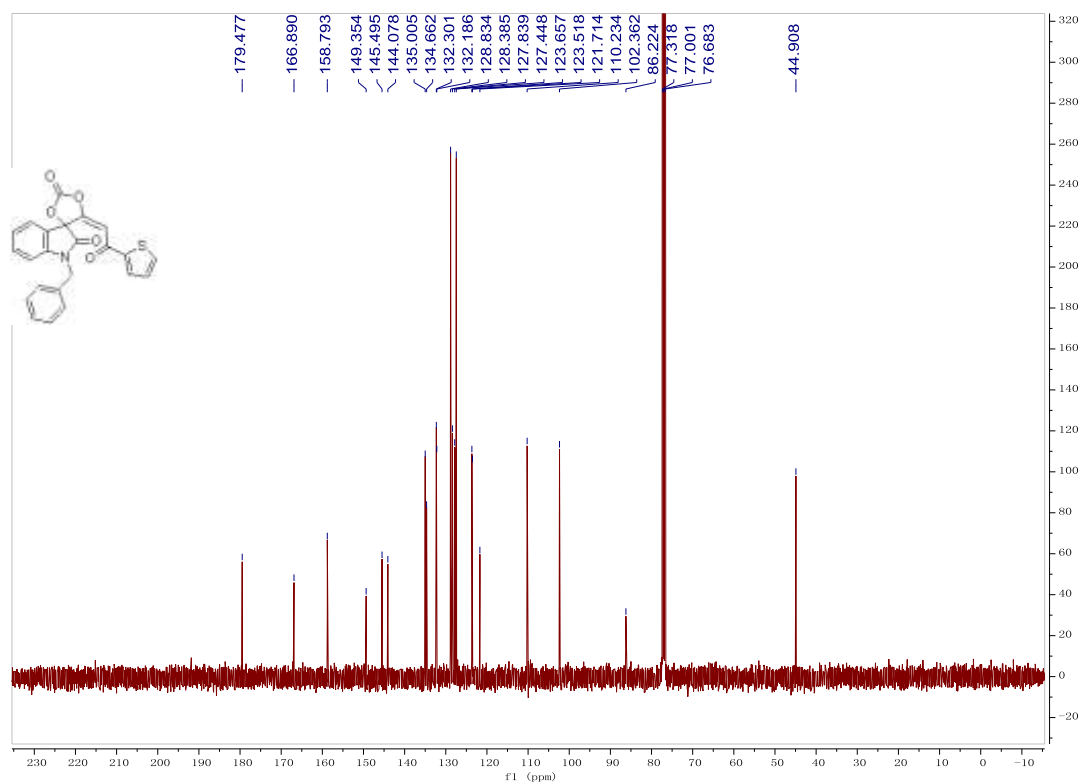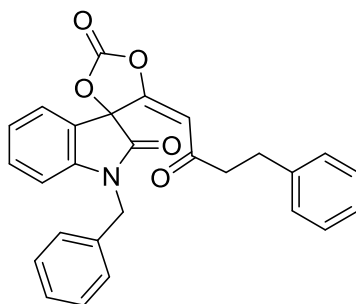

**(*E*)-1-benzyl-5'-(2-oxo-4-phenylbutylidene)spiro[indoline-3,4'-[1,3]dioxolane]-2,2'-dione (2y)**

A white solid, 73% yield (96 mg). M.p.: Decomposition above 60 °C. <sup>1</sup>H NMR (CDCl<sub>3</sub>, TMS, 400 MHz) δ 2.64-2.77 (m, 4H, CH<sub>2</sub>), 4.94 (d, *J* = 16.0 Hz, 1H, CH<sub>2</sub>), 5.13 (d, *J* = 16.0 Hz, 1H, CH<sub>2</sub>), 6.35 (s, 1H, =CH), 6.79 (d, *J* = 8.0 Hz, 1H, ArH), 6.98-7.05 (m, 3H, ArH), 7.11-7.24 (m, 4H, ArH), 7.28-7.39 (m, 4H, ArH), 7.46 (d, *J* = 7.2 Hz, 2H, ArH). <sup>13</sup>C NMR (CDCl<sub>3</sub>, TMS, 100 MHz) δ 29.6, 44.9, 45.4, 86.1, 104.6, 110.1, 121.4, 123.5, 123.6, 126.2, 127.4, 127.9, 128.2, 128.5, 128.9, 132.2, 134.6, 140.2, 145.6, 149.4, 157.9, 166.8, 196.9. IR (EtOH) ν 2924, 2853, 1844, 1731, 1702, 1583, 1467, 1455, 1415, 1022, 970, 792, 697 cm<sup>-1</sup>. HRMS (DART Positive Ion Mode) Calcd. For C<sub>26</sub>H<sub>25</sub>O<sub>3</sub>N<sub>2</sub><sup>+</sup>(M+NH<sub>4</sub>-CO<sub>2</sub>)<sup>+</sup> requires 413.1758, Found: 413.1755.

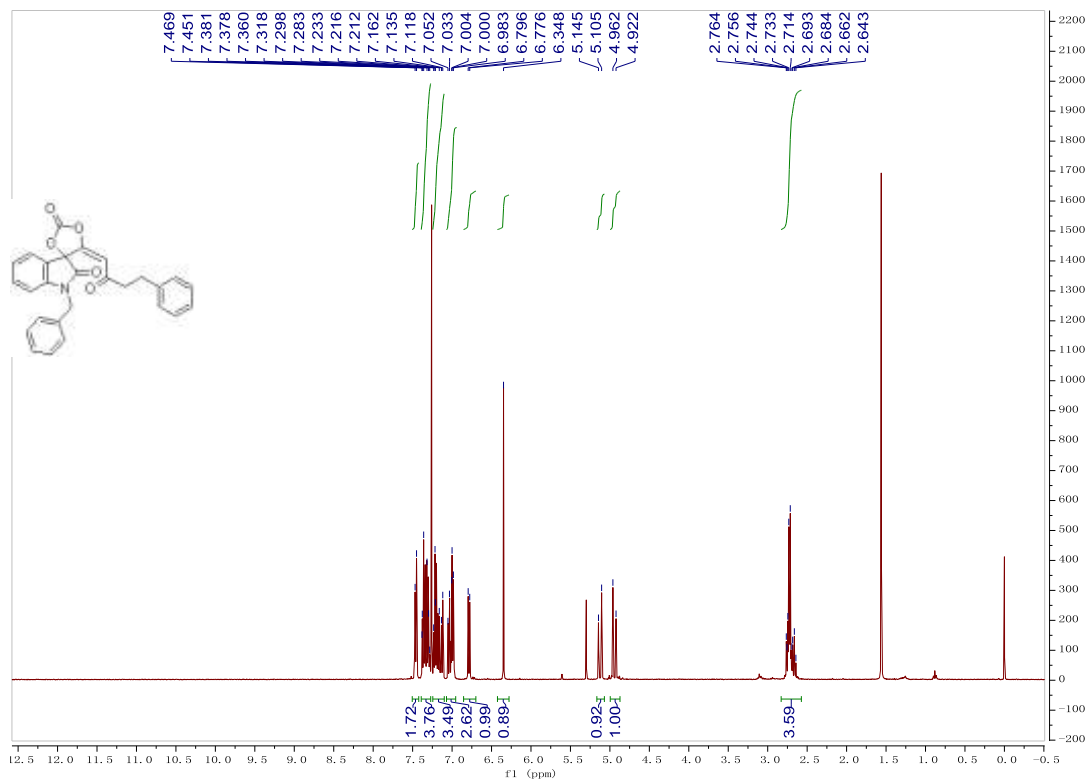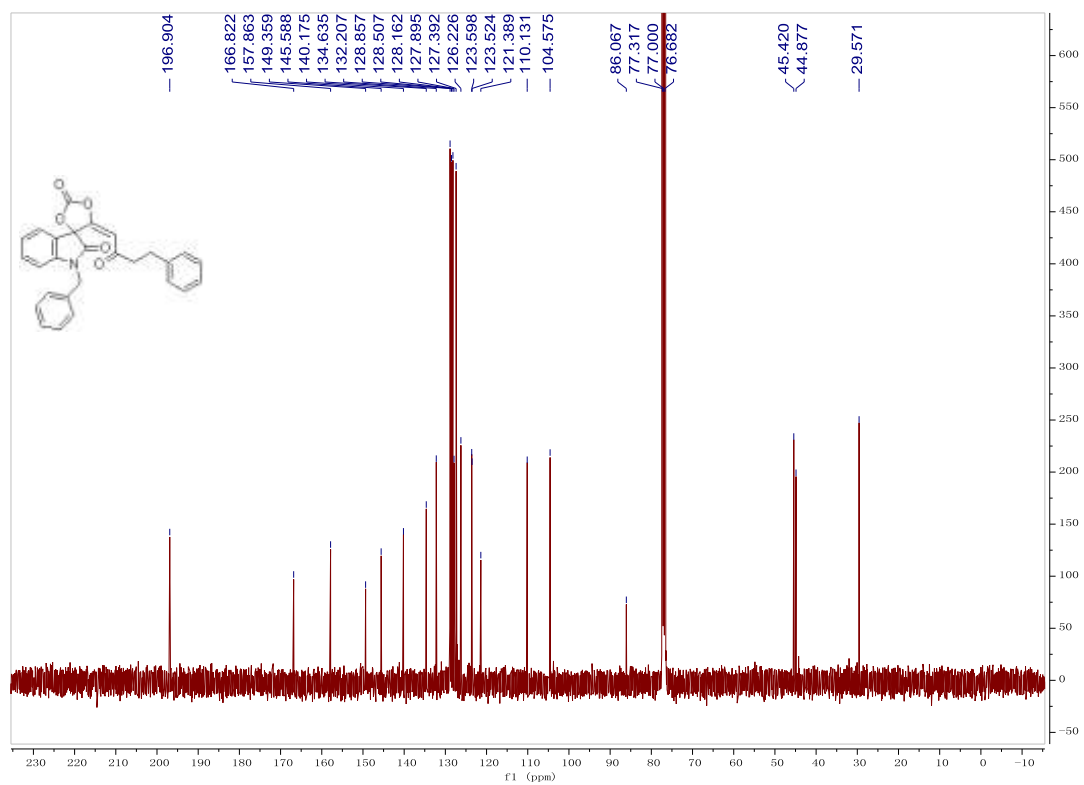



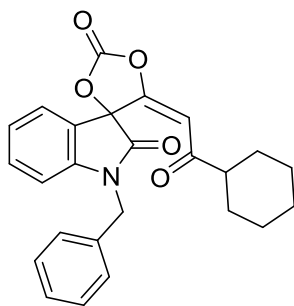

**(*E*)-1-benzyl-5'-(2-cyclohexyl-2-oxoethylidene)spiro[indoline-3,4'-[1,3]dioxolane]-2,2'-dione (2z)**

Compound **2z** was very unstable in silica gel chromatography. We determined 62% yield of **2z** with  $^1\text{H}$  NMR by using 1,3,5-trimethoxybenzene as an internal standard.

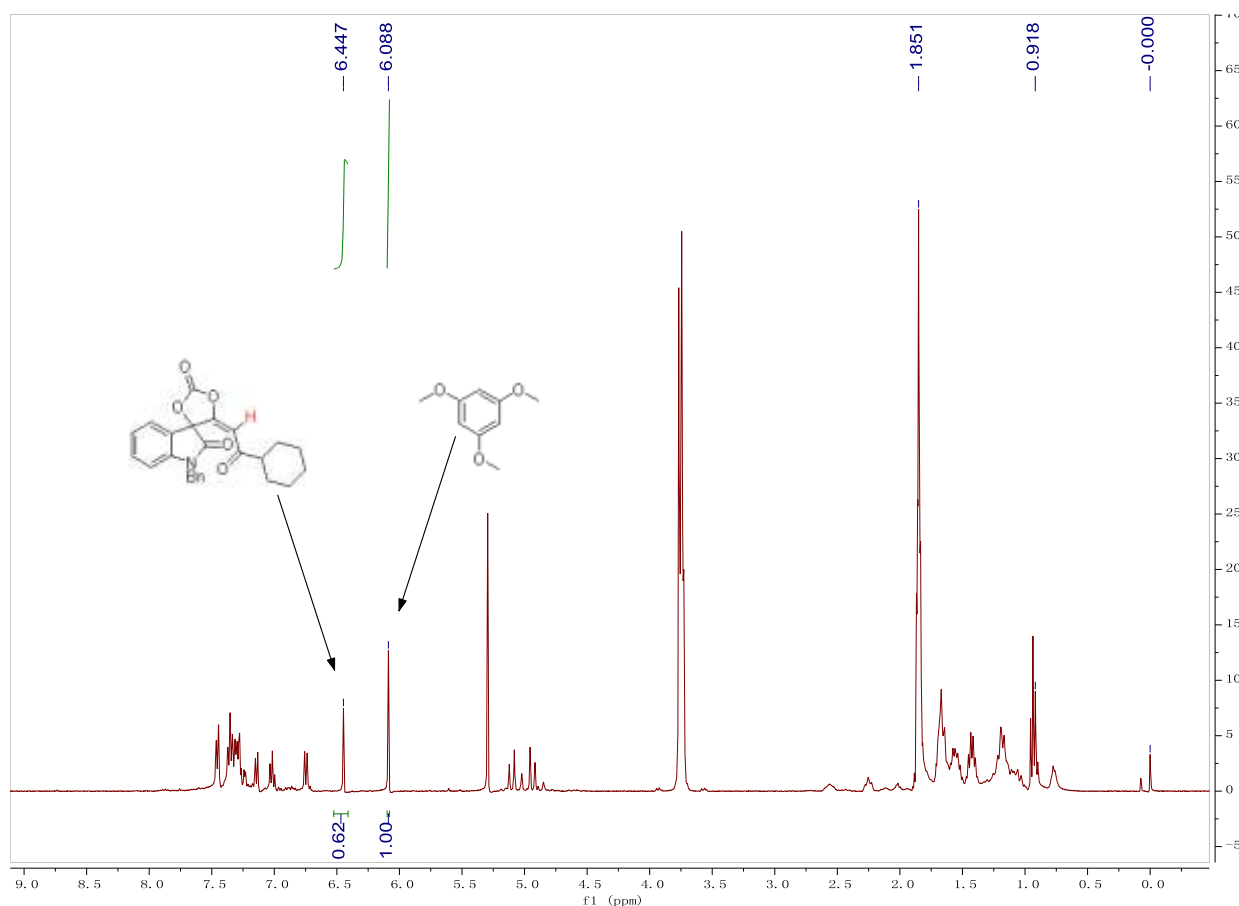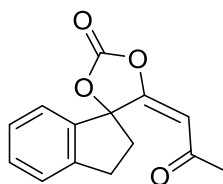

**(*E*)-5'-(2-oxopropylidene)-2,3-dihydrospiro[indene-1,4'-[1,3]dioxolan]-2'-one (2ad)**

A viscous liquid, 32% yield (23 mg).  $^1\text{H}$  NMR ( $\text{CDCl}_3$ , TMS, 400 MHz)  $\delta$  2.10 (s, 3H,  $\text{CH}_3$ ),

2.51-2.59 (m, 1H, CH<sub>2</sub>), 2.98-3.07 (m, 1H, CH<sub>2</sub>), 3.28-3.33 (m, 2H, CH<sub>2</sub>), 6.27 (s, 1H, =CH), 7.13 (d, *J* = 7.6 Hz, 1H, ArH), 7.21-7.26 (m, 1H, ArH), 7.35-7.41 (m, 2H, ArH). <sup>13</sup>C NMR (CDCl<sub>3</sub>, TMS, 100 MHz) δ 30.8, 31.7, 36.9, 98.9, 103.4, 122.6, 125.0, 127.2, 130.7, 137.4, 146.4, 149.9, 163.9, 194.9. IR (EtOH) ν 2937, 2861, 1835, 1695, 1595, 1491, 1384, 1340, 1119, 949, 796 cm<sup>-1</sup>. HRMS (EI) calcd. for C<sub>13</sub>H<sub>12</sub>O<sub>2</sub><sup>+1</sup>(M-CO<sub>2</sub>)<sup>+</sup> requires 200.0837, Found: 200.0841.

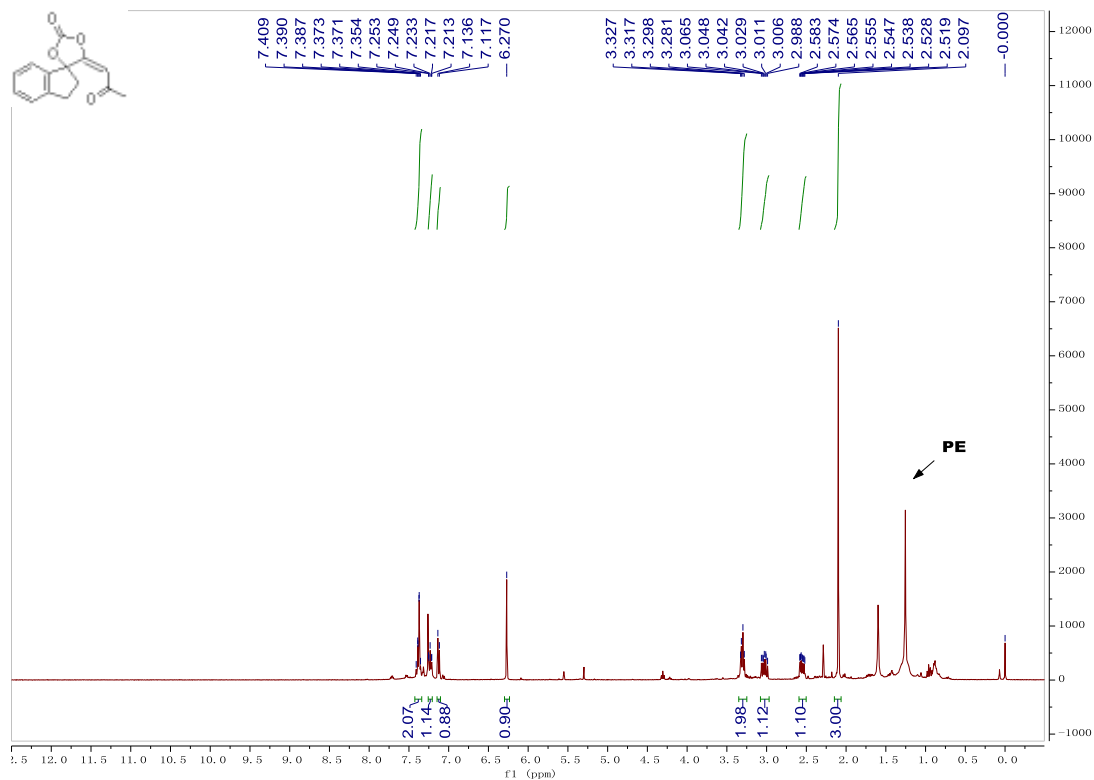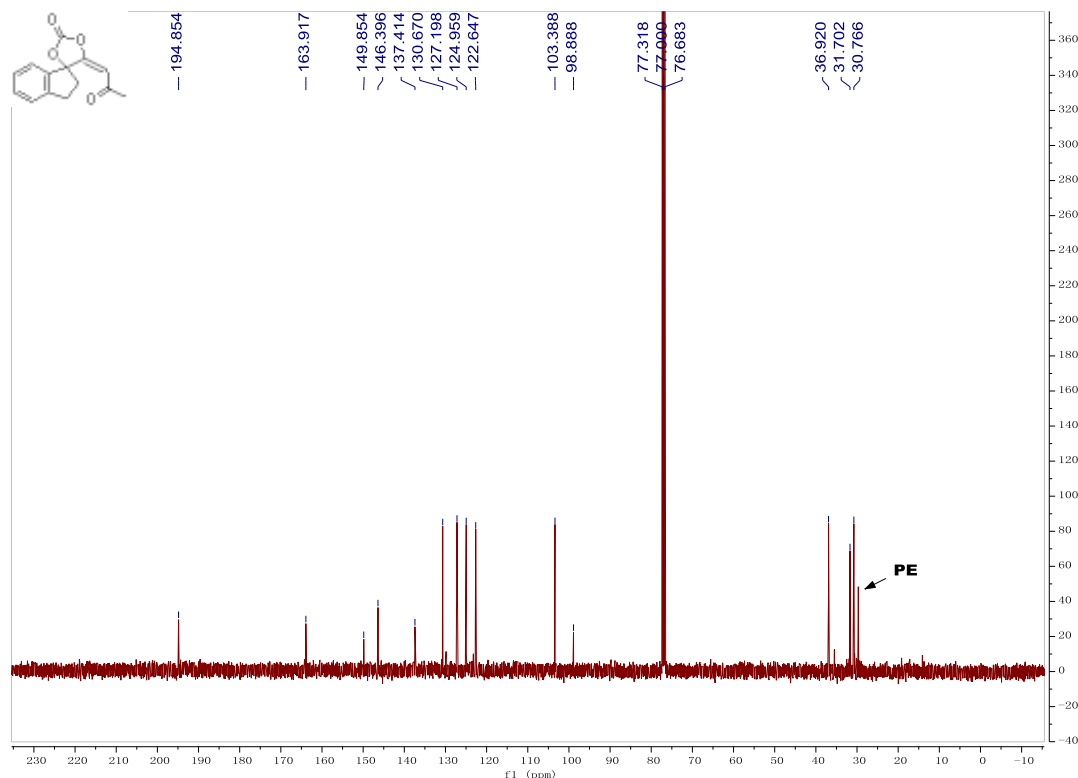

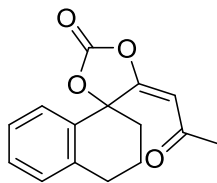

**(*E*)-5'-(2-oxopropylidene)-3,4-dihydro-2H-spiro[naphthalene-1,4'-[1,3]dioxolan]-2'-one (2ae)**

A viscous liquid, 39% yield (30 mg).  $^1\text{H}$  NMR ( $\text{CDCl}_3$ , TMS, 400 MHz)  $\delta$  1.98-2.03 (m, 2H,  $\text{CH}_2$ ), 2.08 (s, 3H,  $\text{CH}_3$ ), 2.18 (d,  $J = 13.6$  Hz, 1H,  $\text{CH}_2$ ), 2.76 (dt,  $J = 4.4, 13.6$  Hz, 1H,  $\text{CH}_2$ ), 2.86-2.94 (m, 1H,  $\text{CH}_2$ ), 3.04-3.14 (m, 1H,  $\text{CH}_2$ ), 6.22 (s, 1H, =CH), 7.05 (d,  $J = 7.6$  Hz, 1H, ArH), 7.13-7.21 (m, 2H, ArH), 7.25-7.30 (m, 1H, ArH).  $^{13}\text{C}$  NMR ( $\text{CDCl}_3$ , TMS, 100 MHz)  $\delta$  19.1, 28.7, 31.7, 33.0, 89.8, 102.7, 126.3, 126.6, 129.0, 129.5, 130.8, 138.9, 149.8, 165.7, 194.7. IR (EtOH)  $\nu$  2922, 2851, 1834, 1698, 1598, 1385, 1342, 1162, 1097, 990, 914, 764  $\text{cm}^{-1}$ . HRMS (EI) calcd. for  $\text{C}_{14}\text{H}_{14}\text{O}_2^{+1}(\text{M}-\text{CO}_2)^+$  requires 214.0994, Found: 214.0990.

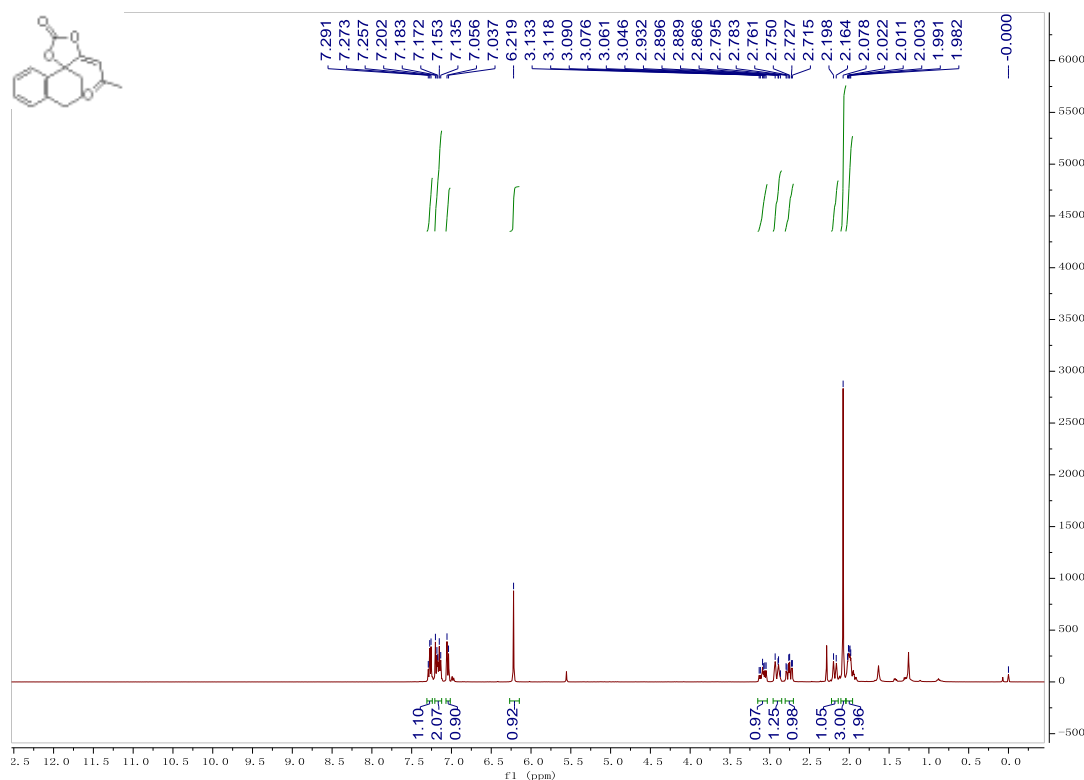

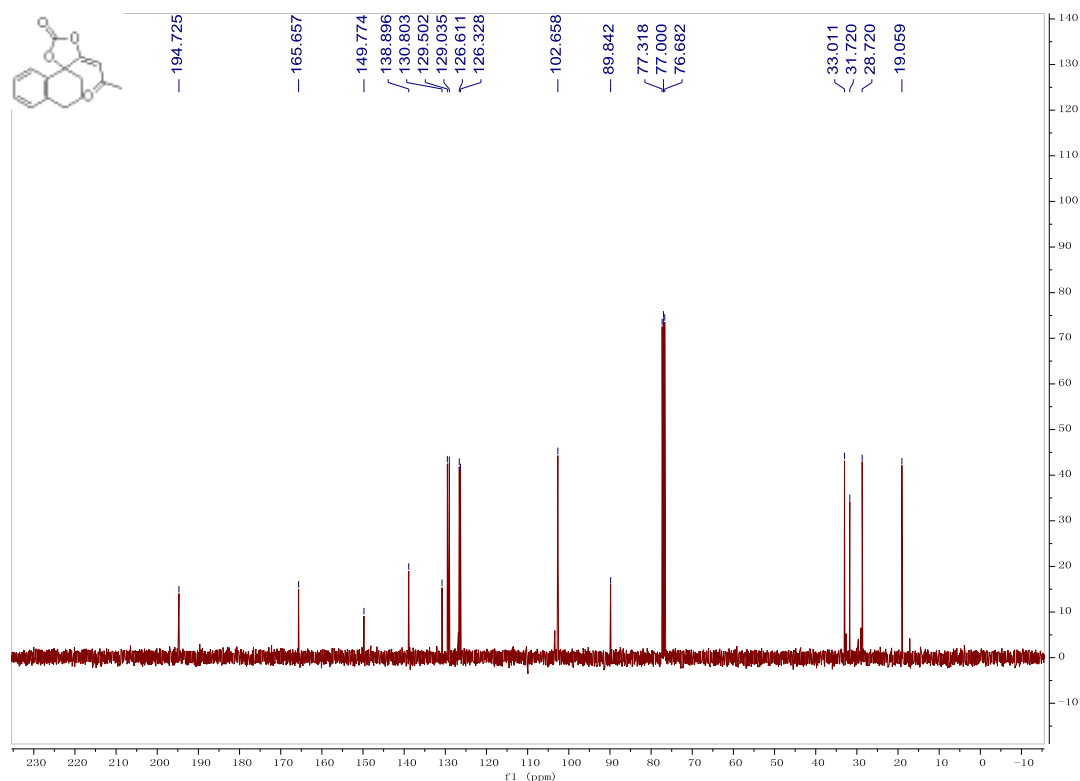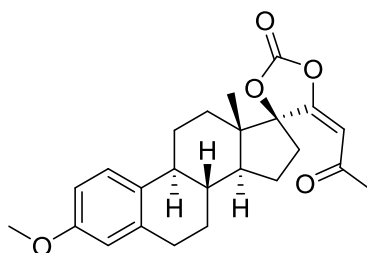

**(8R,9S,13S,14S,17S,**

***E*)-3-methoxy-13-methyl-5'-(2-oxopropylidene)-6,7,8,9,11,12,13,14,15,16-decahydrospiro[cyclopenta[a]phenanthrene-17,4'-[1,3]dioxolan]-2'-one (2af)**

A white solid, 44.5% yield (53 mg). M.p.: 129-131 °C. <sup>1</sup>H NMR (CDCl<sub>3</sub>, TMS, 400 MHz) δ 1.02 (s, 3H, CH<sub>3</sub>), 1.40-1.74 (m, 8H), 1.95 (d, *J* = 6.0 Hz, 1H), 2.10-2.15 (m, 2H), 2.21-2.34 (m, 5H), 2.72-2.80 (m, 1H), 2.84-2.91 (m, 2H), 3.77 (s, 3H, CH<sub>3</sub>), 6.31 (s, 1H, =CH), 6.63 (s, 1H, ArH), 6.69 (d, *J* = 8.4 Hz, 1H, ArH), 7.14 (d, *J* = 8.4 Hz, 1H, ArH). <sup>13</sup>C NMR (CDCl<sub>3</sub>, TMS, 100 MHz) δ 15.0, 24.3, 25.9, 27.5, 29.6, 30.9, 32.5, 32.7, 38.8, 43.3, 49.7, 51.7, 55.1, 100.1, 108.0, 111.5, 113.8, 126.1, 131.6, 137.8, 150.3, 157.5, 161.6, 195.5. IR (EtOH) ν 2926, 2835, 1829, 175, 1633, 1499, 1267, 1069, 1027, 973 cm<sup>-1</sup>. HRMS (ESI) Calcd. For C<sub>24</sub>H<sub>29</sub>O<sub>5</sub><sup>+</sup>(M+H)<sup>+</sup> requires 397.2010, Found: 397.2008.

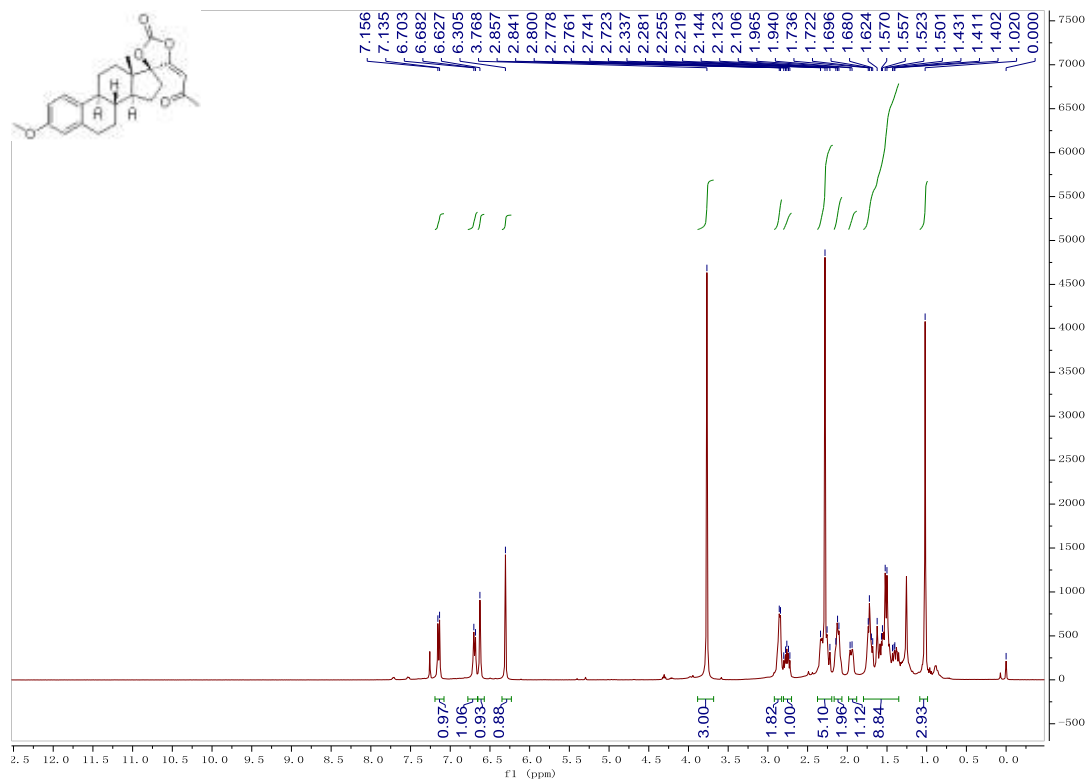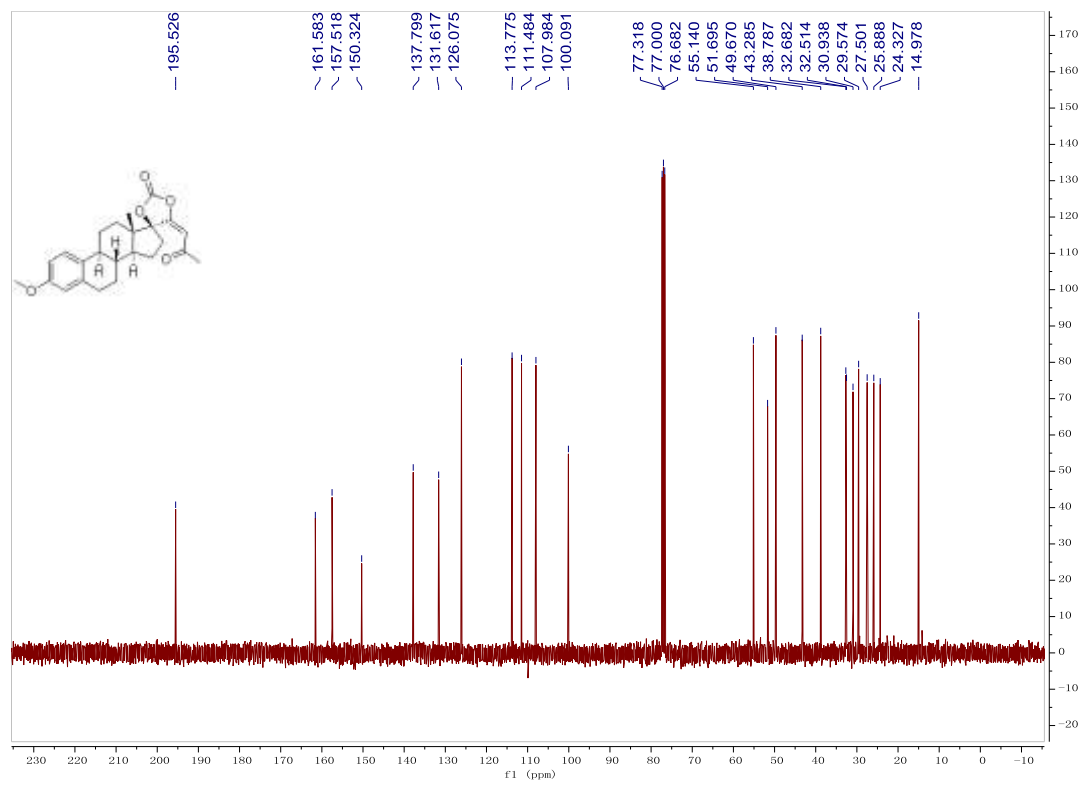

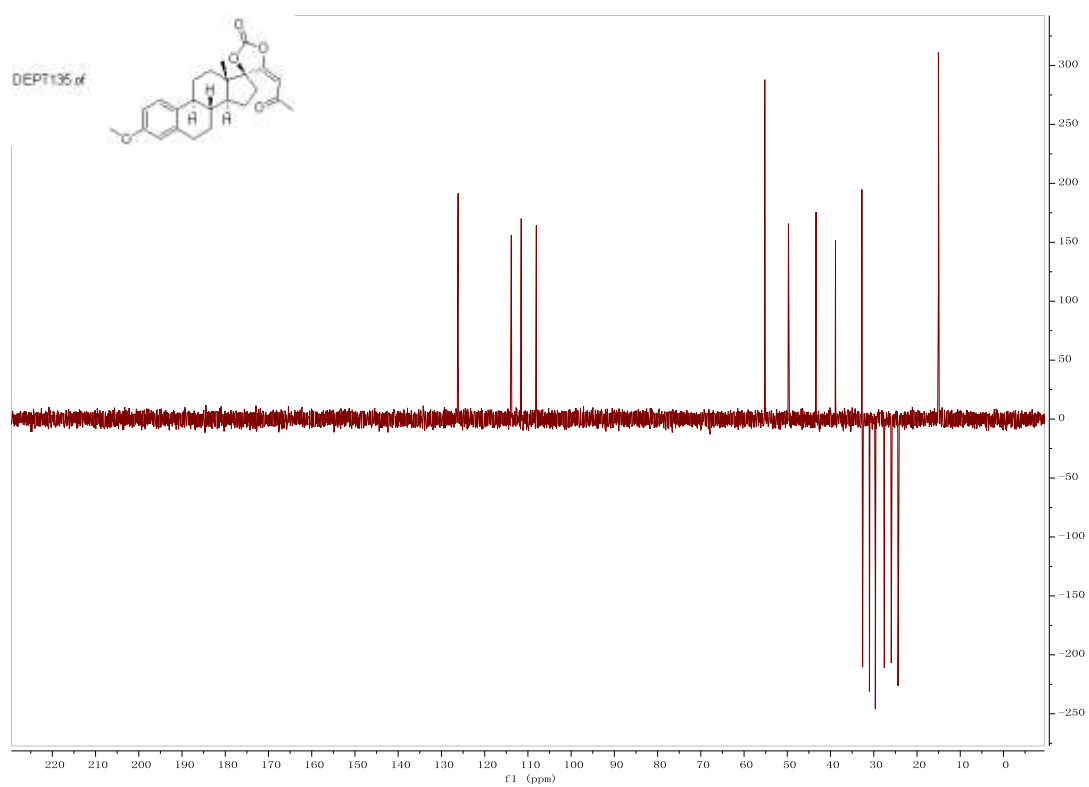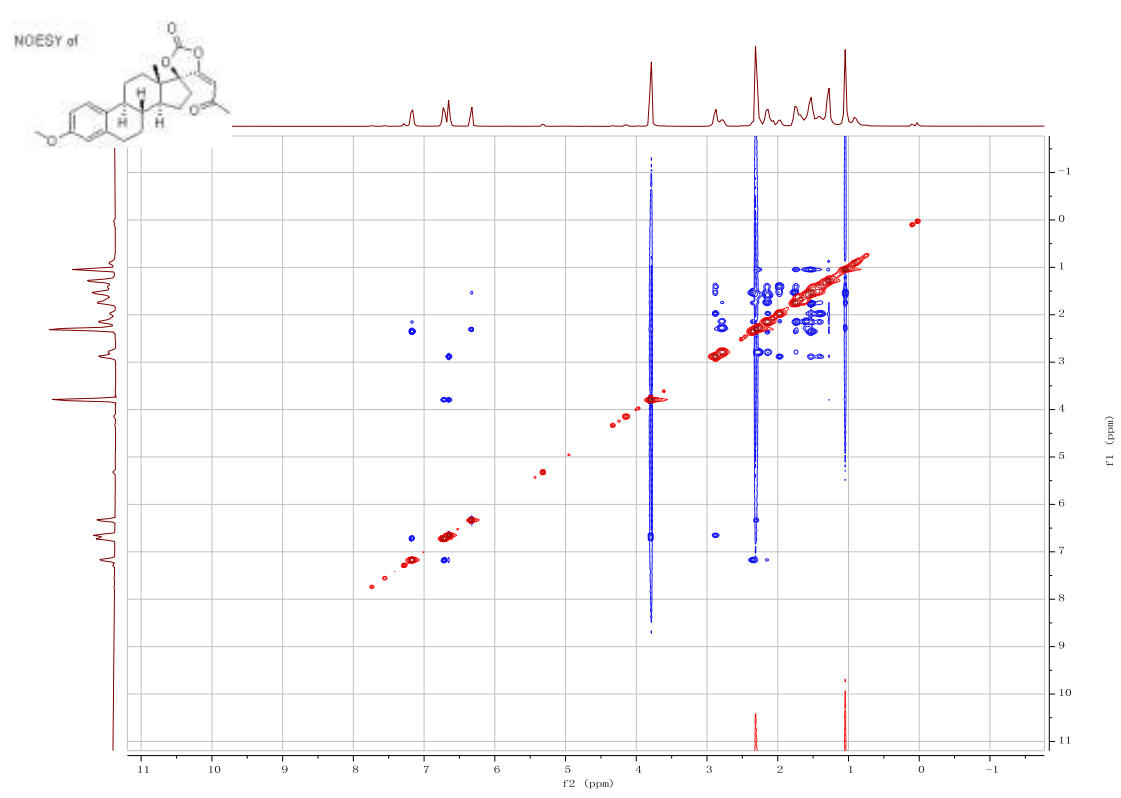

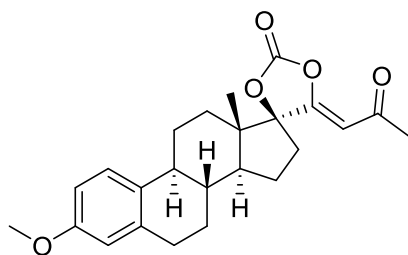

(8R,9S,13S,14S,17S,

**Z)-3-methoxy-13-methyl-5'-(2-oxopropylidene)-6,7,8,9,11,12,13,14,15,16-decahydrospiro[cyclopenta[a]phenanthrene-17,4'-[1,3]dioxolan]-2'-one (2af')**

A white solid, 44.5% yield (53 mg). M.p.: 129-131 °C. <sup>1</sup>H NMR (CDCl<sub>3</sub>, TMS, 400 MHz) δ 1.06 (s, 3H, CH<sub>3</sub>), 1.26 (br, 3H), 1.41-1.71 (m, 8H), 1.89-1.93 (m, 2H), 2.13-2.18 (m, 2H), 2.33-2.59 (m, 5H), 2.88 (d, *J* = 4.8 Hz, 2H), 3.77 (s, 3H, CH<sub>3</sub>), 5.40 (s, 1H, =CH), 6.63 (s, 1H, ArH), 6.71 (d, *J* = 8.0 Hz, 1H, ArH), 7.15 (d, *J* = 8.4 Hz, 1H, ArH). <sup>13</sup>C NMR (CDCl<sub>3</sub>, TMS, 100 MHz) δ 14.8, 22.9, 25.7, 27.1, 29.5, 31.2, 31.4, 34.3, 38.8, 43.0, 48.5, 49.4, 55.2, 98.4, 106.5, 111.6, 113.8, 126.2, 131.3, 137.5, 149.6, 157.6, 162.0, 195.4. IR (EtOH) ν 2919, 2850, 1834, 1706, 1671, 1635, 1609, 1363, 1303, 1254, 1149, 1027, 784 cm<sup>-1</sup>. HRMS (ESI) Calcd. For C<sub>24</sub>H<sub>32</sub>NO<sub>5</sub><sup>+1</sup>(M+NH<sub>4</sub>)<sup>+</sup> requires 414.2275, Found: 414.2271.

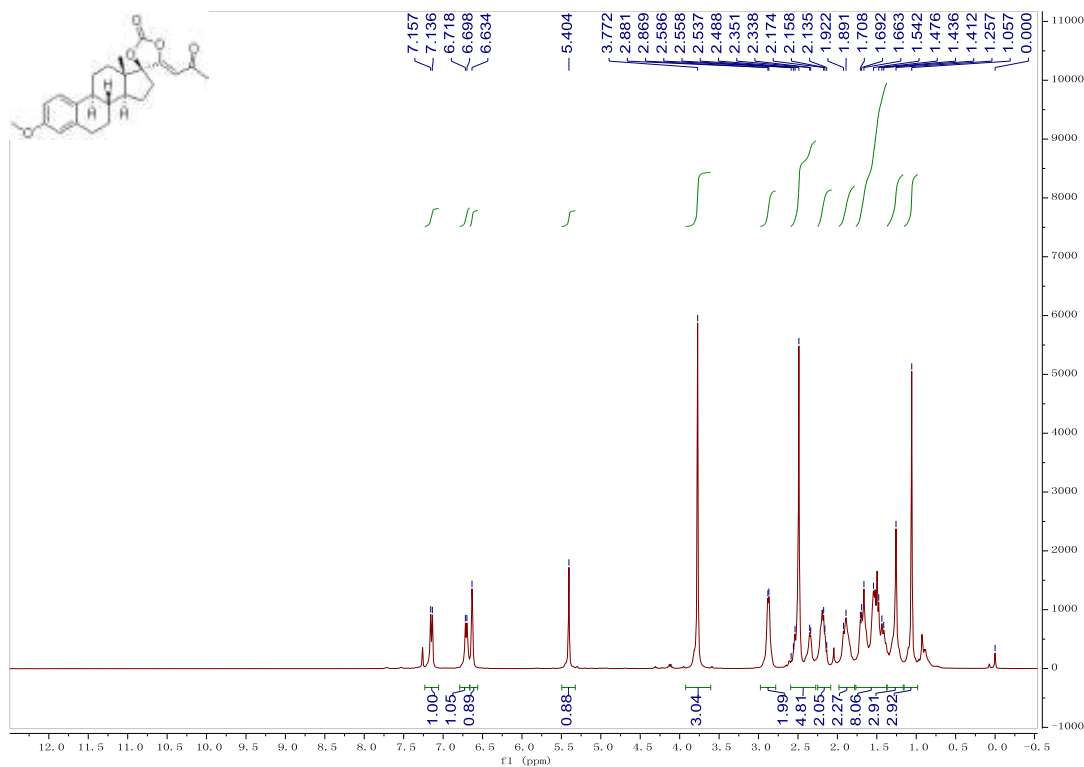

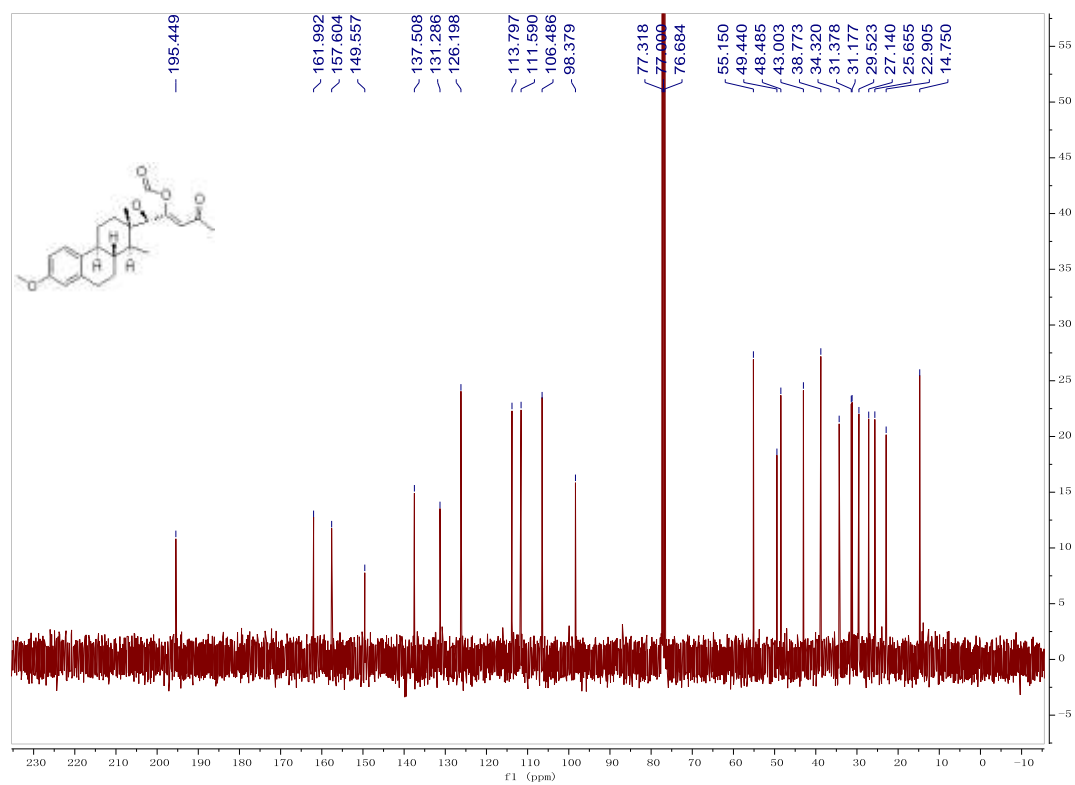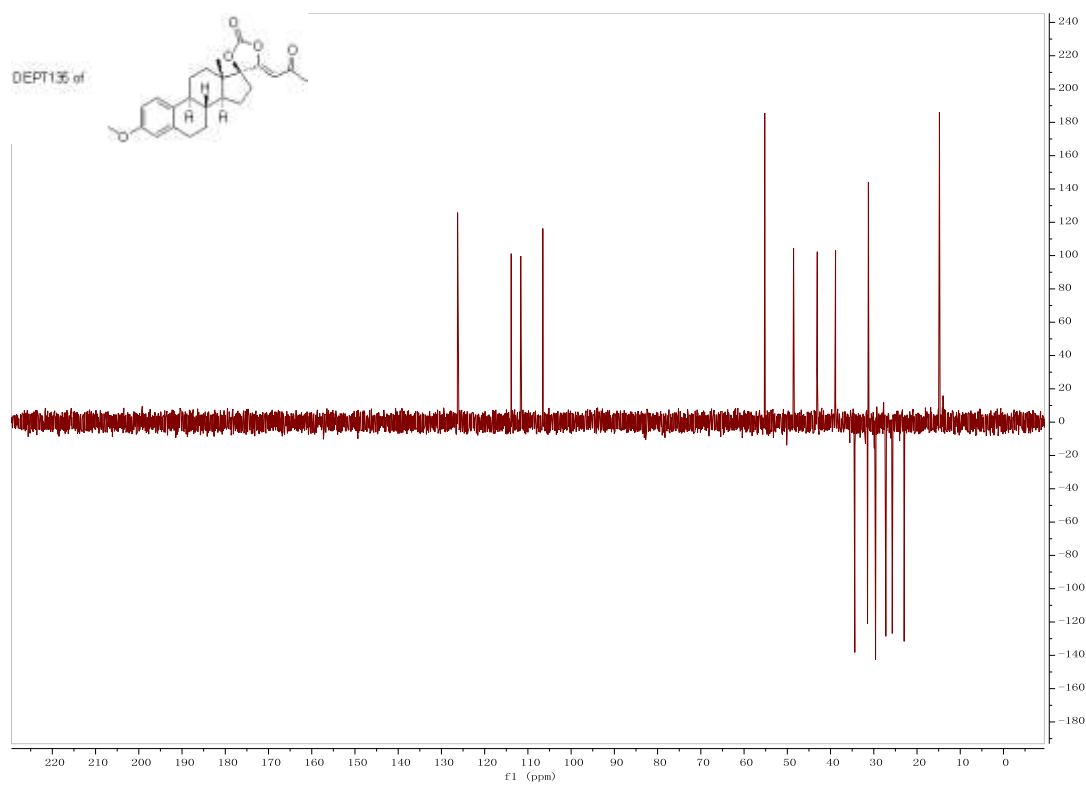



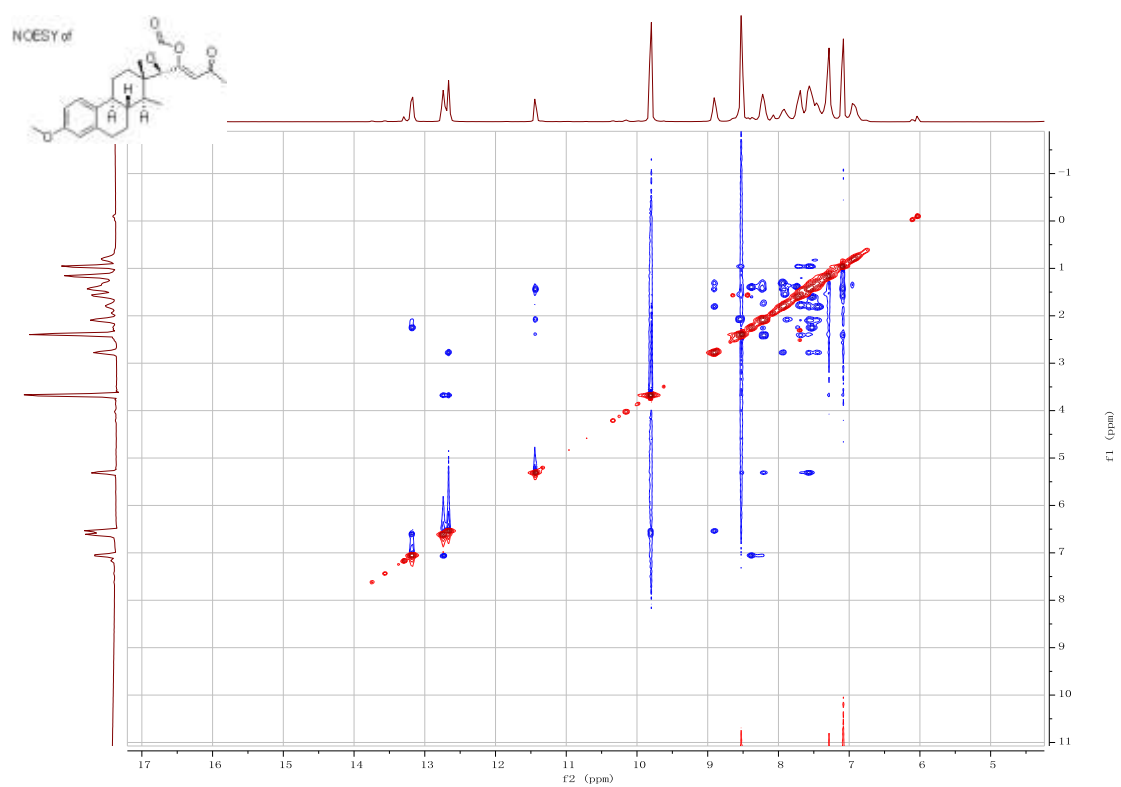

#### 4. General Procedure for Decarboxylative Cyclization of Cyclic Carbonates **2** and Spectroscopic Data of Furanones **3**

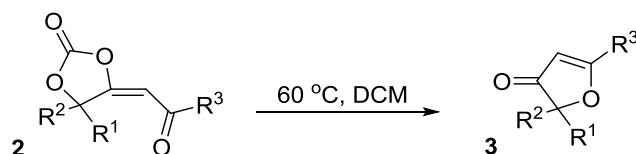

A Schlenk tube was heated under vacuum to remove ambient moisture and water, then filled with argon. After the Schlenk tube was returned to room temperature, cyclic carbonate **2** (0.2 mmol) was added and dissolved in 1.0 mL DCM. After that, the resulting mixture was heated to 60 °C and was stirred at 60 °C until the reaction completed upon monitoring by TLC. Then the solvent was removed under reduced pressure and the residue was directly subjected to a flash column chromatography on silica gel to afford the desired products **3**.

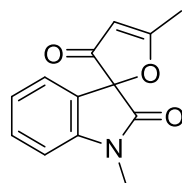

#### **1',5-dimethyl-3H-spiro[furan-2,3'-indoline]-2',3-dione (3a)**

A white solid, 86% yield (39 mg). M.p.: 117-119 °C. <sup>1</sup>H NMR (CDCl<sub>3</sub>, TMS, 400 MHz) δ 2.44 (s, 3H, CH<sub>3</sub>), 3.22 (s, 3H, CH<sub>3</sub>), 5.64 (s, 1H, =CH), 6.90 (d, *J* = 7.6 Hz, 1H, ArH), 7.06-7.14 (m, 2H, ArH), 7.40 (dt, *J* = 1.6, 7.2 Hz, 1H, ArH). <sup>13</sup>C NMR (CDCl<sub>3</sub>, TMS, 100 MHz) δ 17.0, 26.8, 89.2, 104.0, 109.2, 123.4, 123.8, 131.2, 145.2, 168.7, 192.8, 197.5. IR (EtOH) ν 3052, 2917, 2849, 1730, 1696, 1597, 1490, 1453, 1323, 1161, 978, 756 cm<sup>-1</sup>. HRMS (ESI) Calcd. For C<sub>13</sub>H<sub>12</sub>NO<sub>3</sub><sup>+1</sup>(M+H)<sup>+</sup> requires 230.0812, Found: 230.0809.

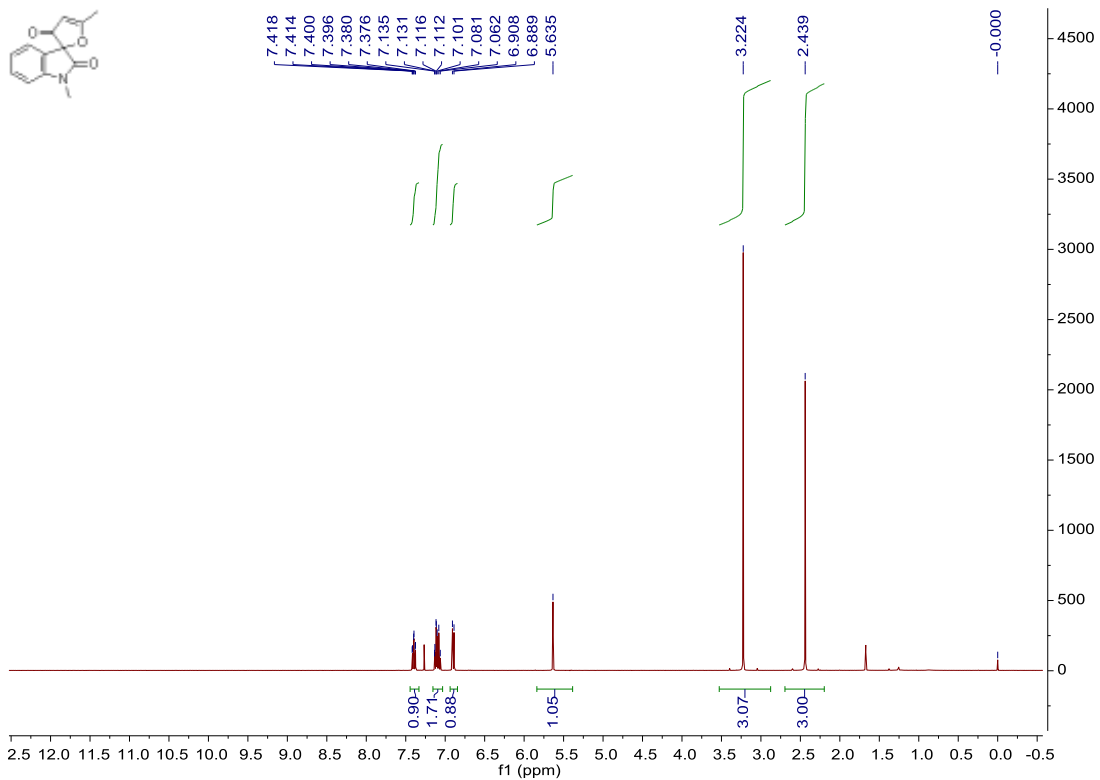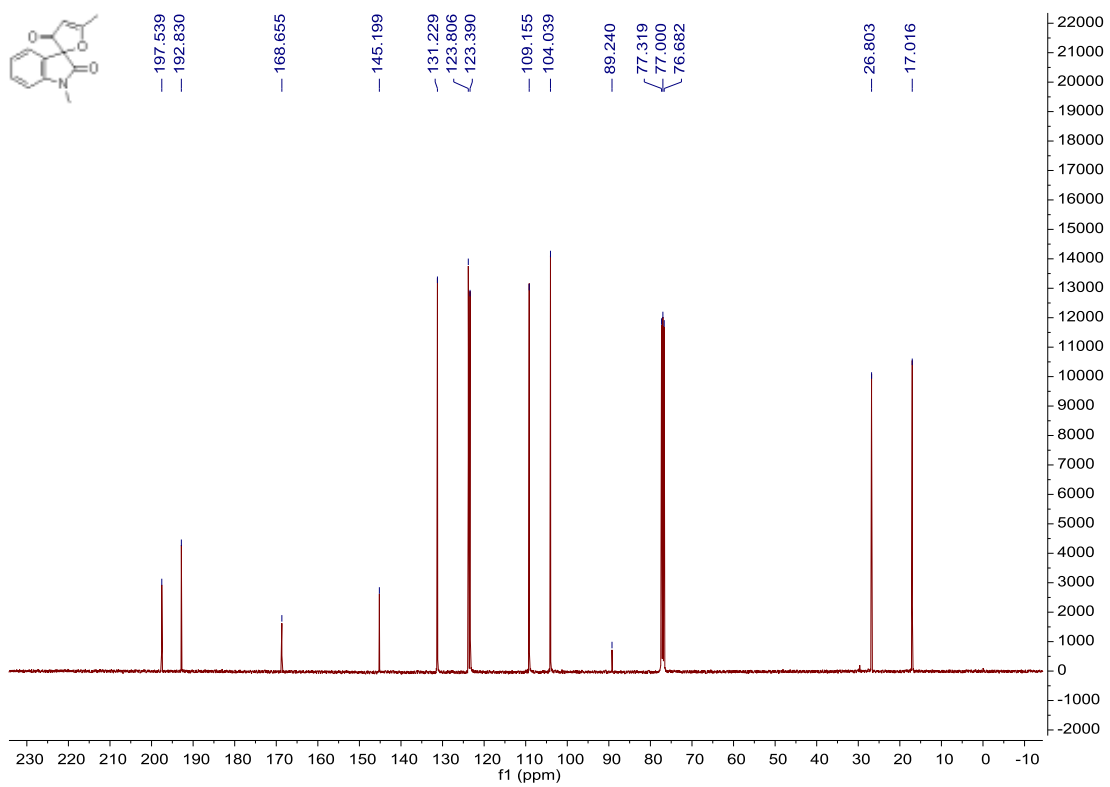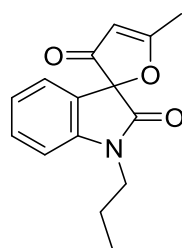

S139

### 5-methyl-1'-propyl-3H-spiro[furan-2,3'-indoline]-2',3-dione (3b)

A white solid, 90% yield (46 mg). M.p.: 98-100 °C. <sup>1</sup>H NMR (CDCl<sub>3</sub>, TMS, 400 MHz) δ 0.98 (t, *J* = 7.6 Hz, 3H, CH<sub>3</sub>), 1.69-1.79 (m, 2H, CH<sub>2</sub>), 2.45 (s, 3H, CH<sub>3</sub>), 3.62-3.74 (m, 2H, CH<sub>2</sub>), 5.63 (s, 1H, =CH), 6.91 (d, *J* = 8.0 Hz, 1H, ArH), 7.04-7.13 (m, 2H, ArH), 7.38 (t, *J* = 8.0 Hz, 1H, ArH). <sup>13</sup>C NMR (CDCl<sub>3</sub>, TMS, 100 MHz) δ 11.2, 17.1, 20.6, 42.1, 89.4, 104.1, 109.4, 123.2, 123.5, 123.9, 131.1, 144.7, 168.7, 192.7, 197.6. IR (EtOH) ν 2955, 2920, 2850, 1730, 1705, 1608, 1467, 1360, 1324, 940 cm<sup>-1</sup>. HRMS (ESI) Calcd. For C<sub>15</sub>H<sub>16</sub>NO<sub>3</sub><sup>+</sup>(M+H)<sup>+</sup> requires 258.1125, Found: 258.1122.

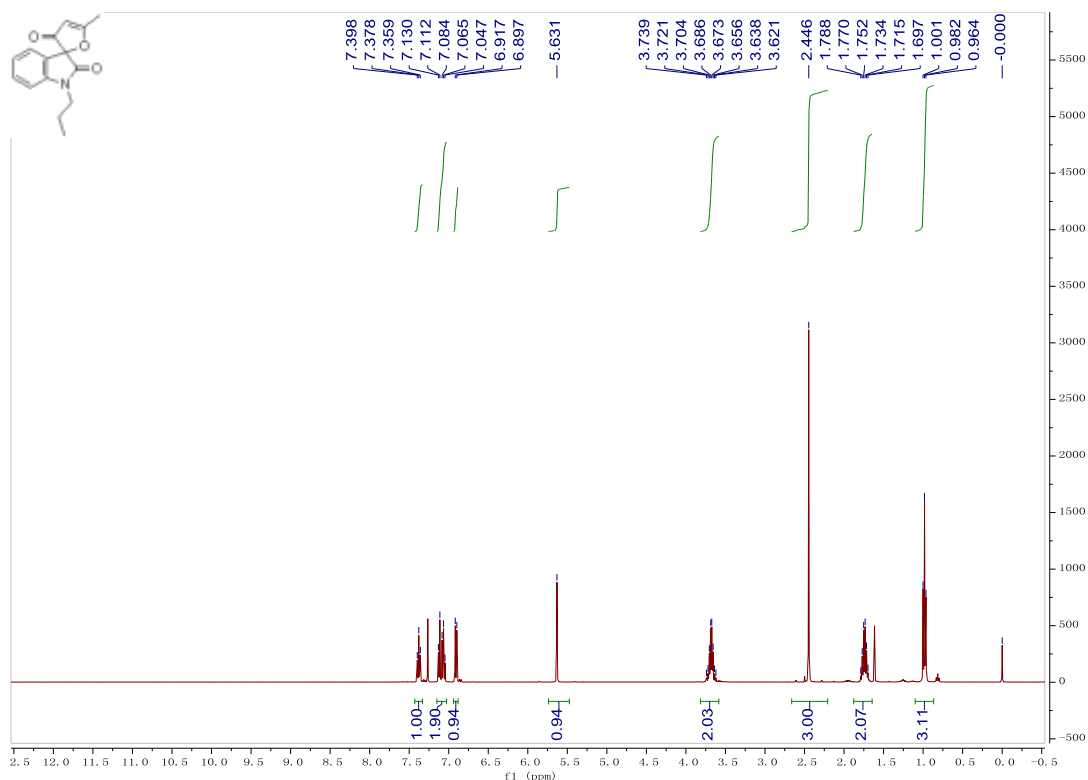

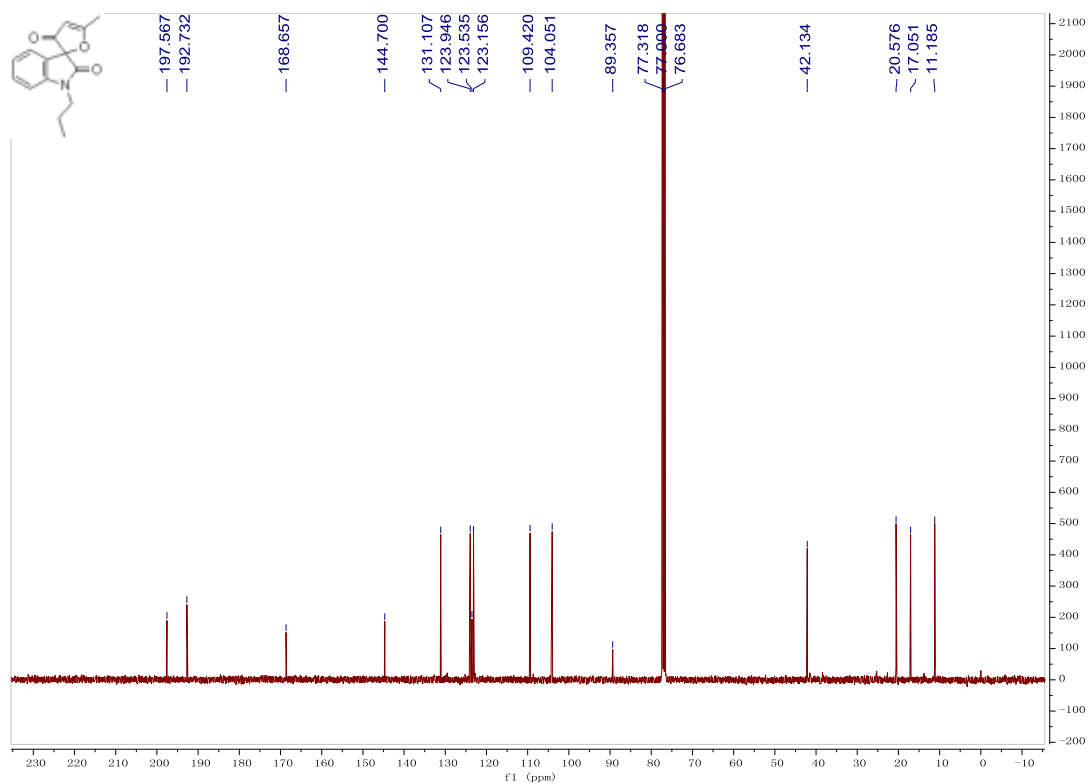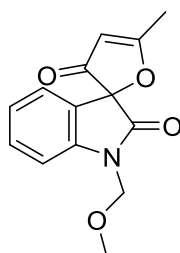

**1'-(methoxymethyl)-5-methyl-3H-spiro[furan-2,3'-indoline]-2',3-dione (3c)**

A white solid, 85% yield (44 mg). M.p.: 122-124 °C.  $^1\text{H}$  NMR ( $\text{CDCl}_3$ , TMS, 400 MHz)  $\delta$  2.45 (s, 3H,  $\text{CH}_3$ ), 3.35 (s, 3H,  $\text{CH}_3$ ), 5.10 (d,  $J = 10.8$  Hz, 1H,  $\text{CH}_2$ ), 5.16 (d,  $J = 10.8$  Hz, 1H,  $\text{CH}_2$ ), 5.64 (s, 1H, =CH), 7.09-7.16 (m, 3H, ArH), 7.40 (dt,  $J = 1.6, 7.2$  Hz, 1H, ArH).  $^{13}\text{C}$  NMR ( $\text{CDCl}_3$ , TMS, 100 MHz)  $\delta$  17.0, 56.3, 71.7, 89.5, 103.8, 110.7, 123.0, 123.8, 123.9, 131.3, 143.3, 169.3, 192.9, 197.2. IR (EtOH)  $\nu$  2916, 2843, 1738, 1704, 1604, 1468, 1343, 1094, 1076, 937  $\text{cm}^{-1}$ . HRMS (ESI) Calcd. For  $\text{C}_{14}\text{H}_{17}\text{N}_2\text{O}_4$   $^{+1}(\text{M}+\text{NH}_4)^+$  requires 277.1183, Found: 277.1177.

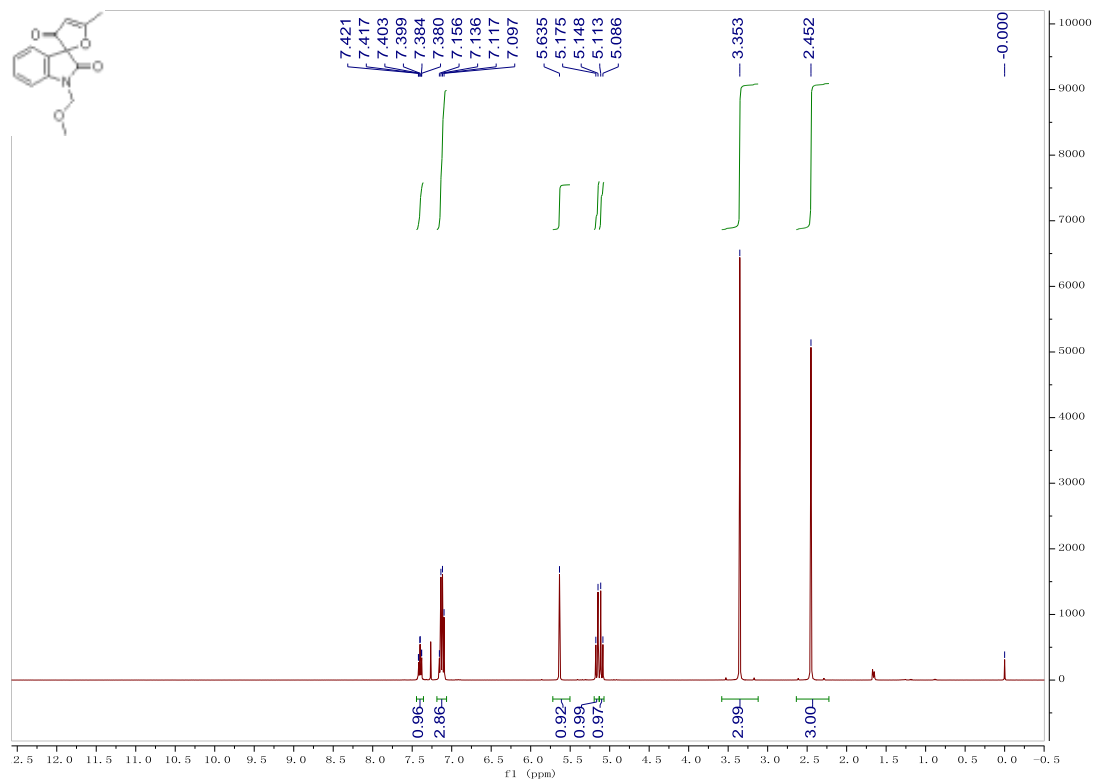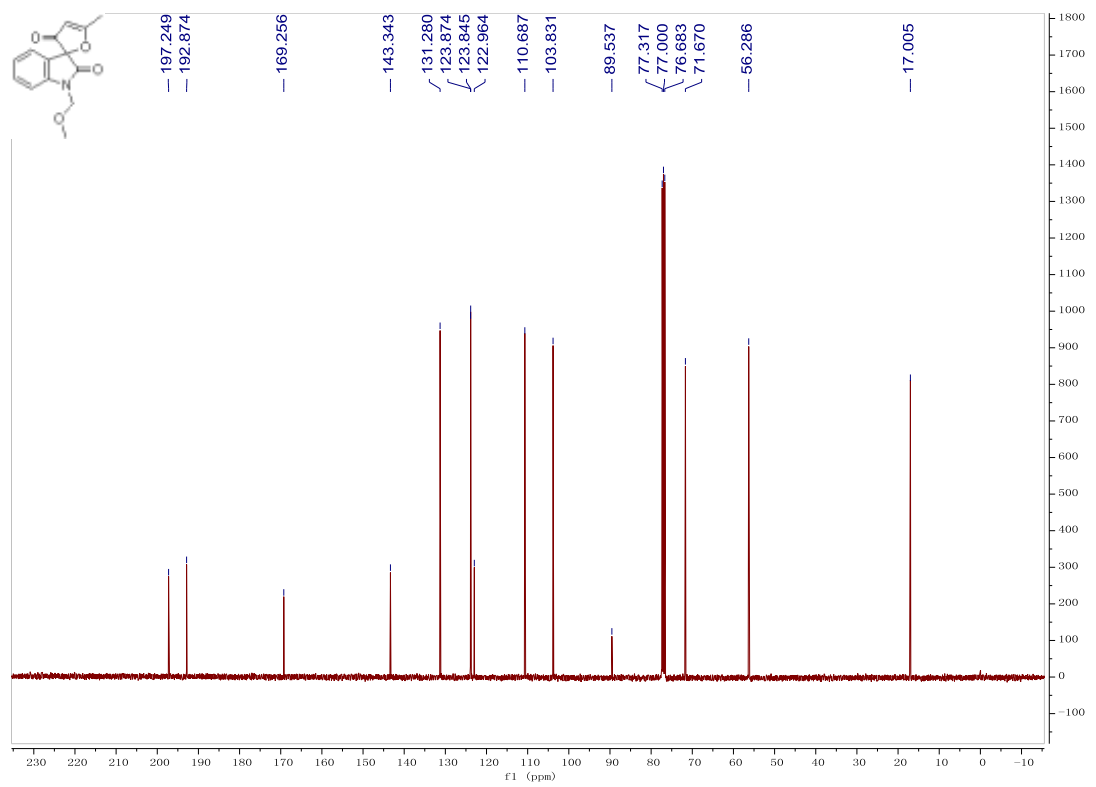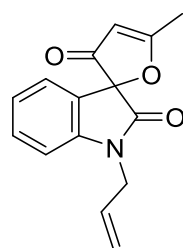

S142

### 1'-allyl-5-methyl-3H-spiro[furan-2,3'-indoline]-2',3-dione (3d)

A white solid, 92% yield (47 mg). M.p.: 91-93 °C.  $^1\text{H}$  NMR ( $\text{CDCl}_3$ , TMS, 400 MHz)  $\delta$  2.45 (s, 3H,  $\text{CH}_3$ ), 4.30 (dd,  $J = 5.2, 16.8$  Hz, 1H,  $\text{CH}_2$ ), 4.38 (dd,  $J = 5.2, 16.8$  Hz, 1H,  $\text{CH}_2$ ), 5.26 (d,  $J = 10.4$  Hz, 1H,  $=\text{CH}_2$ ), 5.33 (d,  $J = 17.2$  Hz, 1H,  $=\text{CH}_2$ ), 5.64 (s, 1H,  $=\text{CH}$ ), 5.79-5.89 (m, 1H,  $=\text{CH}$ ), 6.88 (d,  $J = 8.0$  Hz, 1H, ArH), 7.05-7.14 (m, 2H, ArH), 7.36 (t,  $J = 7.6$  Hz, 1H, ArH).  $^{13}\text{C}$  NMR ( $\text{CDCl}_3$ , TMS, 100 MHz)  $\delta$  17.0, 42.7, 89.3, 104.0, 110.0, 118.0, 123.3, 123.4, 123.9, 130.2, 131.1, 144.4, 168.4, 192.8, 197.4. IR (EtOH)  $\nu$  2956, 2919, 2850, 1731, 1703, 1606, 1488, 1167, 987, 937, 750  $\text{cm}^{-1}$ . HRMS (ESI) Calcd. For  $\text{C}_{15}\text{H}_{17}\text{N}_2\text{O}_3^{+1}(\text{M}+\text{NH}_4)^+$  requires 273.1234, Found: 273.1229.  $[\alpha]_{\text{D}}^{25} = +100.00$  (c 0.04,  $\text{CH}_2\text{Cl}_2$ ) for 82% *ee*; Enantiomeric excess was determined by HPLC with a Chiralcel AS-H column, Hexane/*i*PrOH = 80/20, 0.7 mL/min, 254 nm,  $t_{\text{minor}} = 28.290$  min,  $t_{\text{major}} = 23.423$  min.

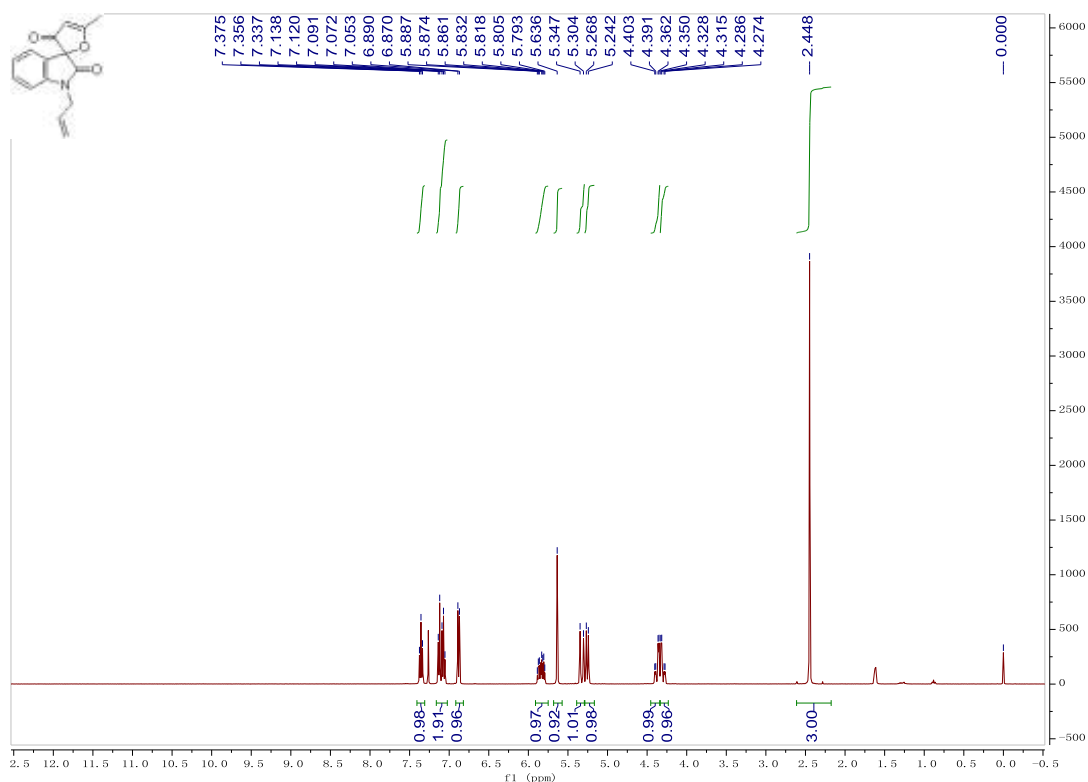

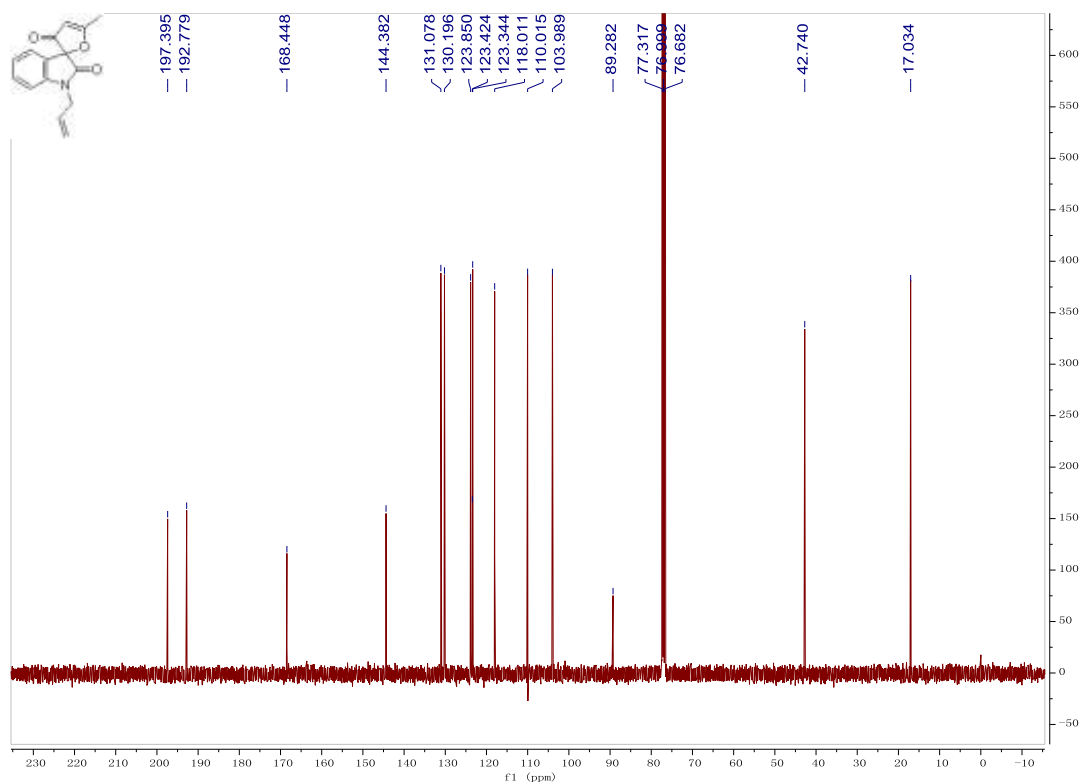

实验时间: 2018-04-26, 21:14:09  
谱图文件: D:\Sun YaoLiang\oa2\18-6-c-rac-A5-R-20.org

名称:  
实验时间: 2018-04-26, 21:16:57  
积分方法: 面积归一法

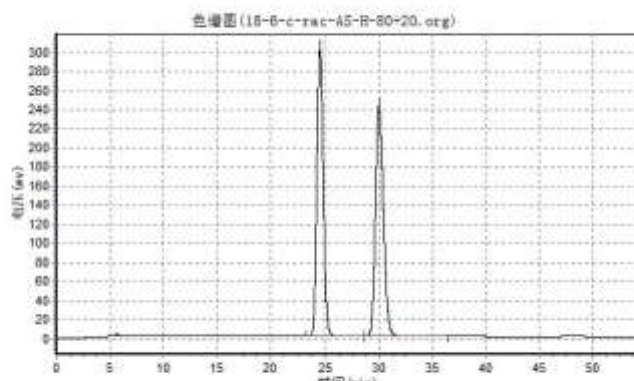

分析结果表

| 峰号 | 峰名 | 保留时间   | 峰高         | 峰面积          | 含量       |
|----|----|--------|------------|--------------|----------|
| 1  |    | 24.598 | 299287.688 | 12616214.000 | 50.0626  |
| 2  |    | 30.068 | 241303.000 | 12884673.000 | 49.9374  |
| 总计 |    |        | 540591.188 | 25200887.000 | 100.0000 |



实验时间: 2018-04-27, 9:28:53  
谱图文件: D:\Sun Yaoliang\co2\18-B-c-azr-AS-B-80+20.org

实验者:  
报告时间: 2018-04-27, 9:39:24  
积分方法: 面积归一法

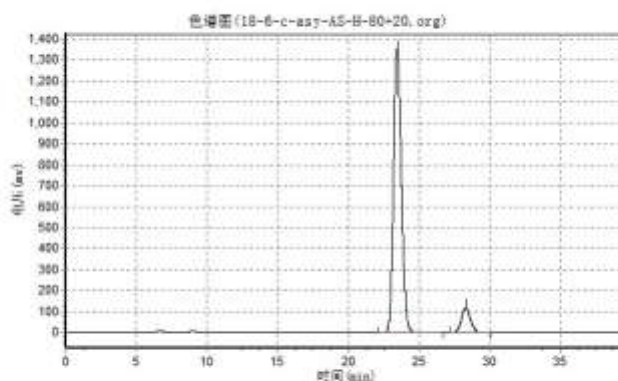

分析结果表

| 峰号 | 峰名 | 保留时间   | 峰高          | 峰面积          | 含量       |
|----|----|--------|-------------|--------------|----------|
| 1  |    | 23.423 | 1351788.250 | 52703420.000 | 90.9990  |
| 2  |    | 28.290 | 116479.653  | 8213083.000  | 9.0010   |
| 总计 |    |        | 1467267.883 | 57916473.000 | 100.0000 |

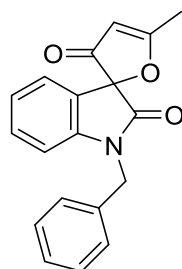

### 1'-benzyl-5-methyl-3H-spiro[furan-2,3'-indoline]-2',3-dione (3e)

A white solid, 93% yield (57 mg). M.p.: 116-118 °C. <sup>1</sup>H NMR (CDCl<sub>3</sub>, TMS, 400 MHz) δ 2.47 (s, 3H, CH<sub>3</sub>), 4.60 (d, *J* = 16.0 Hz, 1H, CH<sub>2</sub>), 4.99 (d, *J* = 16.0 Hz, 1H, CH<sub>2</sub>), 5.66 (s, 1H, =CH), 6.73 (d, *J* = 7.6 Hz, 1H, ArH), 7.04 (dt, *J* = 0.8, 7.6 Hz, 1H, ArH), 7.13 (dd, *J* = 0.8, 7.6 Hz, 1H, ArH), 7.23-7.37 (m, 6H, ArH). <sup>13</sup>C NMR (CDCl<sub>3</sub>, TMS, 100 MHz) δ 17.1, 44.2, 89.4, 104.0, 110.2, 123.4, 123.8, 127.1, 127.8, 128.9, 131.1, 134.6, 144.3, 168.9, 192.9, 197.5. IR (EtOH) ν 3105, 3055, 2956, 2849, 1855, 1732, 1704, 1698, 1419, 1165, 824 cm<sup>-1</sup>. HRMS (ESI) Calcd. For C<sub>19</sub>H<sub>19</sub>N<sub>2</sub>O<sub>3</sub><sup>+1</sup>(M+NH<sub>4</sub>)<sup>+</sup> requires 323.1390, Found: 323.1385.

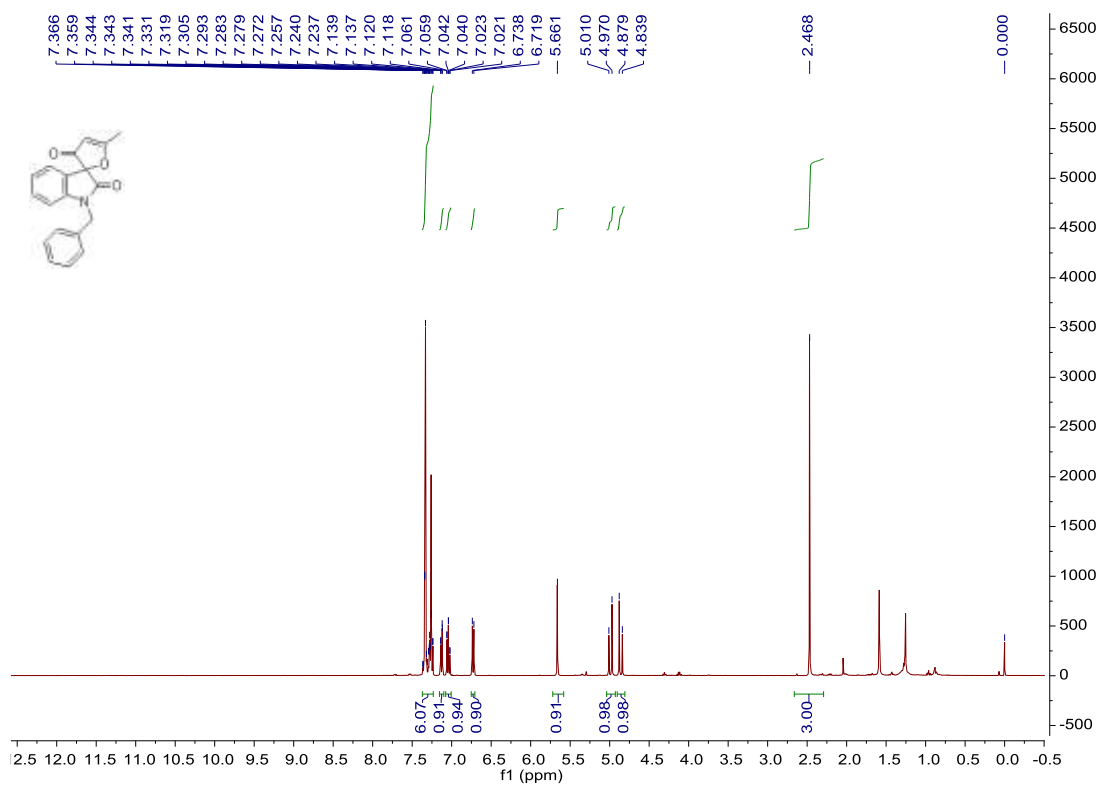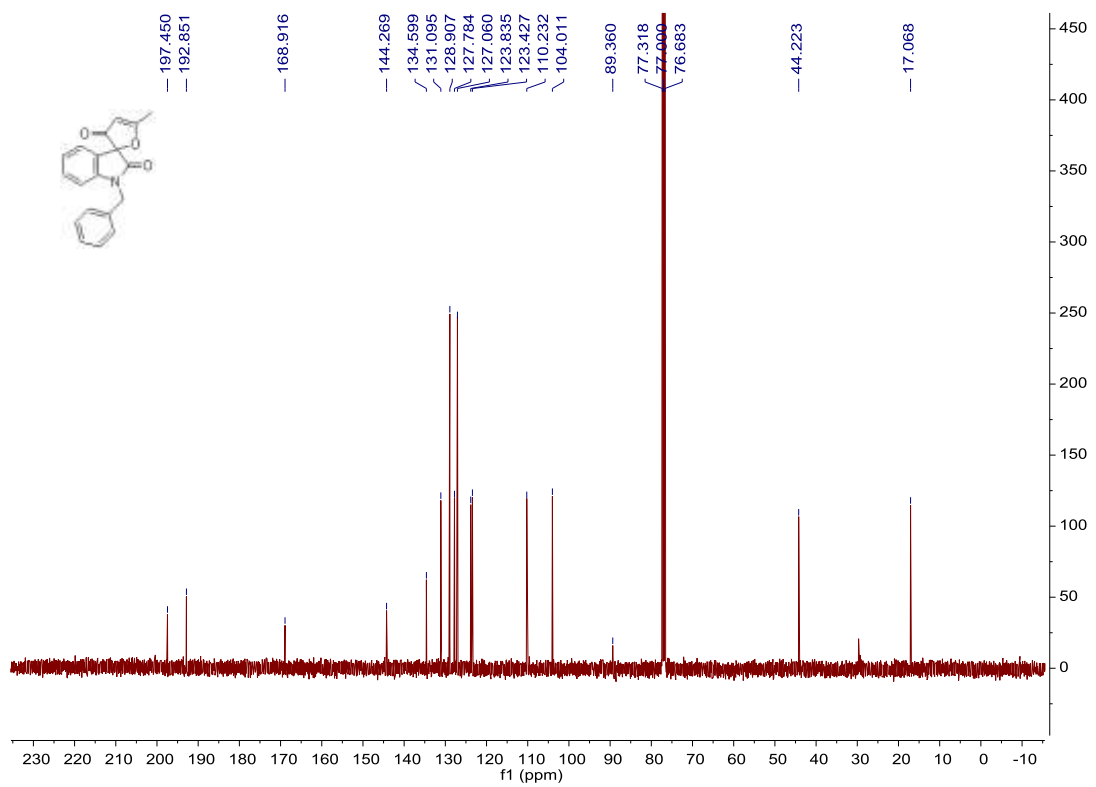

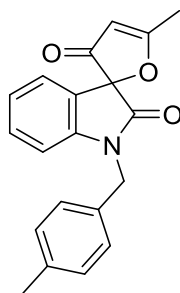

### 5-methyl-1'-(4-methylbenzyl)-3H-spiro[furan-2,3'-indoline]-2',3-dione (**3f**)

A white solid, 96% yield (61 mg). M.p.: 119-121 °C.  $^1\text{H}$  NMR ( $\text{CDCl}_3$ , TMS, 400 MHz)  $\delta$  2.31 (s, 3H,  $\text{CH}_3$ ), 2.46 (s, 3H,  $\text{CH}_3$ ), 4.82 (d,  $J = 16.0$  Hz, 1H,  $\text{CH}_2$ ), 4.92 (d,  $J = 16.0$  Hz, 1H,  $\text{CH}_2$ ), 5.66 (s, 1H, =CH), 6.74 (d,  $J = 8.0$  Hz, 1H, ArH), 7.03 (t,  $J = 7.6$  Hz, 1H, ArH), 7.10-7.15 (m, 3H, ArH), 7.21-7.27 (m, 3H, ArH).  $^{13}\text{C}$  NMR ( $\text{CDCl}_3$ , TMS, 100 MHz)  $\delta$  17.0, 21.1, 44.0, 89.3, 104.0, 110.2, 123.3, 123.4, 123.8, 127.1, 129.5, 131.0, 131.5, 137.5, 144.3, 168.8, 192.8, 197.5. IR (EtOH)  $\nu$  3112, 2925, 2849, 1731, 1702, 1606, 1487, 1467, 1378, 1323, 1165, 750  $\text{cm}^{-1}$ . HRMS (ESI) Calcd. For  $\text{C}_{20}\text{H}_{21}\text{N}_2\text{O}_3^{+1}(\text{M}+\text{NH}_4)^+$  requires 337.1547, Found: 337.1538.  $[\alpha]_{\text{D}}^{25} = +27.50$  (c 0.04,  $\text{CH}_2\text{Cl}_2$ ) for 85% *ee*; Enantiomeric excess was determined by HPLC with a Chiralcel AD-H column, Hexane/*i*PrOH = 80/20, 0.7 mL/min, 254 nm,  $t_{\text{minor}} = 31.657$  min,  $t_{\text{major}} = 44.990$  min.

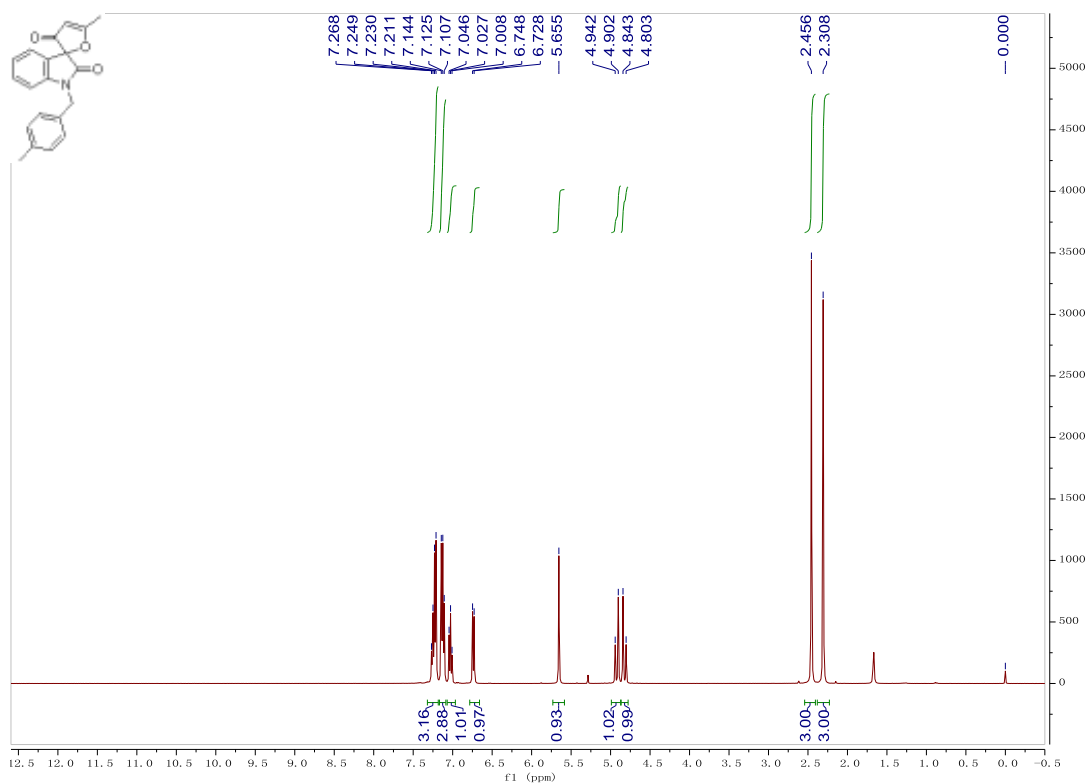

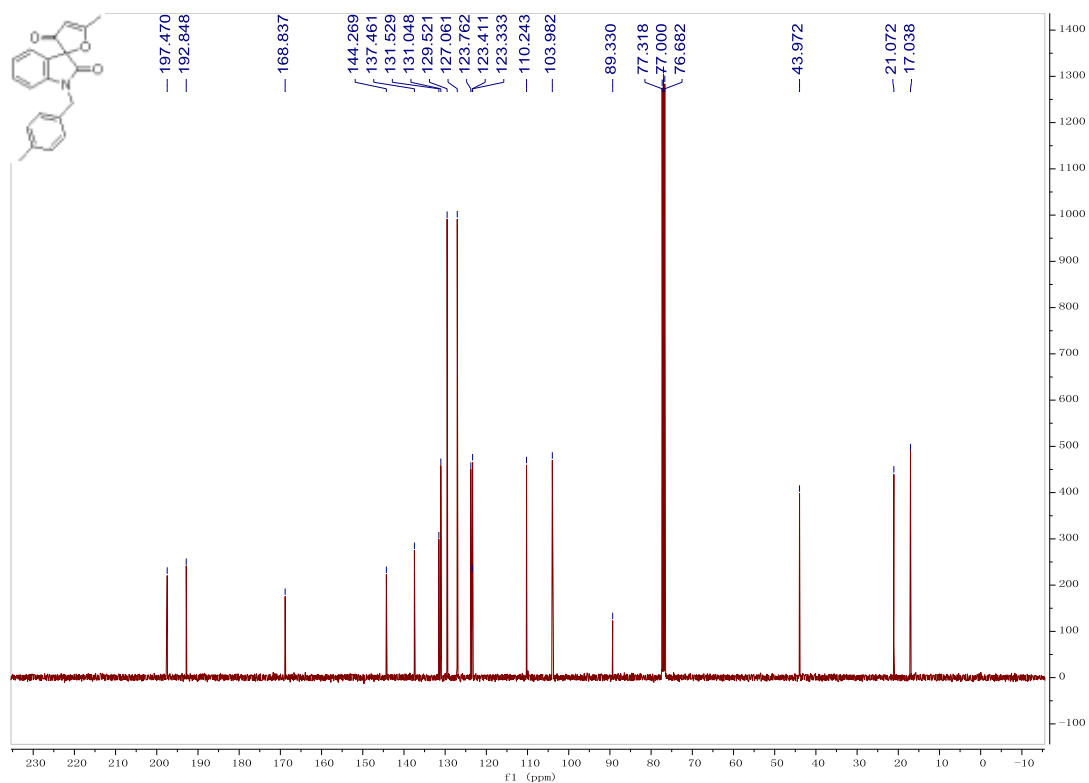

实验时间: 2018-04-21 16:23:22  
谱图文件: D:\Sun Yashuang\002118-1-rac.org

谱图名称: 2018-04-21\_16:23:22  
谱图类型: 谱图  
谱图格式: 谱图

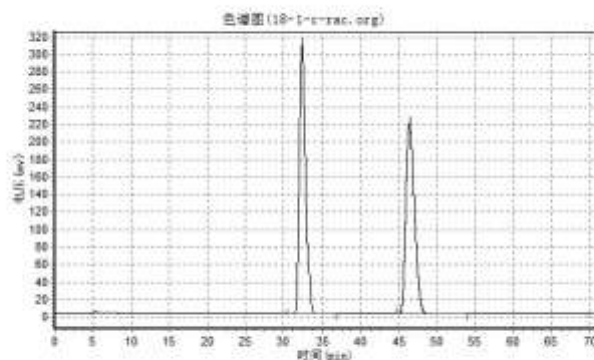

分析结果表

| 峰号 | 峰名 | 保留时间   | 峰高         | 峰面积          | 含量       |
|----|----|--------|------------|--------------|----------|
| 1  |    | 32.432 | 306488.656 | 17262000.000 | 50.1035  |
| 2  |    | 46.432 | 217151.703 | 17190702.000 | 49.8965  |
| 总计 |    |        | 523640.359 | 34452702.000 | 100.0000 |

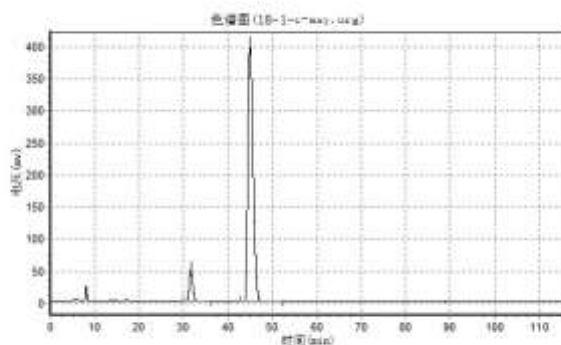

分析结果表

| 峰号 | 峰名 | 保留时间   | 峰高         | 峰面积          | 含量       |
|----|----|--------|------------|--------------|----------|
| 1  |    | 31.657 | 48715.031  | 2689362.759  | 7.7254   |
| 2  |    | 44.900 | 399206.125 | 32242156.000 | 92.2746  |
| 总计 |    |        | 447923.156 | 34931518.759 | 100.0000 |

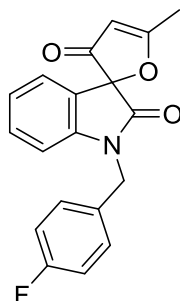

### 1'-(4-fluorobenzyl)-5-methyl-3H-spiro[furan-2,3'-indoline]-2',3-dione (**3g**)

A white solid, 94% yield (61 mg). M.p.: 135-137 °C. <sup>1</sup>H NMR (CDCl<sub>3</sub>, TMS, 400 MHz)  $\delta$  2.47 (s, 3H, CH<sub>3</sub>), 4.80 (d, *J* = 16.0 Hz, 1H, CH<sub>2</sub>), 4.97 (d, *J* = 16.0 Hz, 1H, CH<sub>2</sub>), 5.66 (s, 1H, =CH), 6.72 (d, *J* = 8.0 Hz, 1H, ArH), 7.00-7.08 (m, 3H, ArH), 7.13 (dd, *J* = 0.8, 7.6 Hz, 1H, ArH), 7.25-7.34 (m, 3H, ArH). <sup>13</sup>C NMR (CDCl<sub>3</sub>, TMS, 100 MHz)  $\delta$  17.1, 43.5, 89.3, 104.0, 110.1, 115.8 (d, *J* = 21.5 Hz), 123.45, 123.53, 123.9, 128.8 (d, *J* = 8.2 Hz), 130.4 (d, *J* = 3.2 Hz), 131.1, 144.0, 162.3 (d, *J* = 244.7 Hz), 168.9, 192.9, 197.4. <sup>19</sup>F NMR (376 MHz, CDCl<sub>3</sub>, CFCl<sub>3</sub>)  $\delta$  -114.42(-114.34). IR (EtOH)  $\nu$  3112, 3055, 2922, 2841, 1730, 1699, 1509, 1378, 1160, 990, 749 cm<sup>-1</sup>. HRMS (ESI) Calcd. For C<sub>19</sub>H<sub>18</sub>FN<sub>2</sub>O<sub>3</sub><sup>+</sup>(M+NH<sub>4</sub>)<sup>+</sup> requires 341.1296, Found: 341.1290. [ $\alpha$ ]<sub>D</sub><sup>25</sup> = +193.33 (c 0.02, CH<sub>2</sub>Cl<sub>2</sub>) for 74% *ee*; Enantiomeric excess was determined by HPLC with a Chiralcel AD-H column, Hexane/<sup>*i*</sup>PrOH = 80/20, 0.7 mL/min, 254 nm,  $t_{minor}$  = 27.065 min,  $t_{major}$  = 36.198 min.

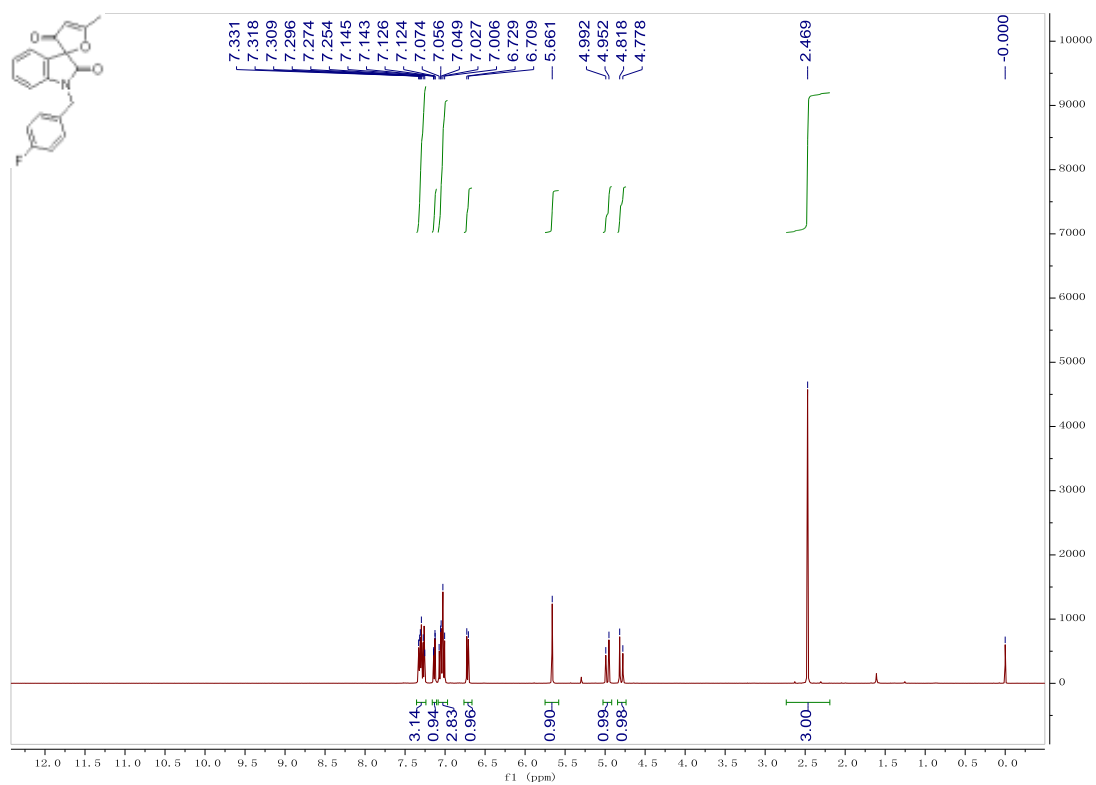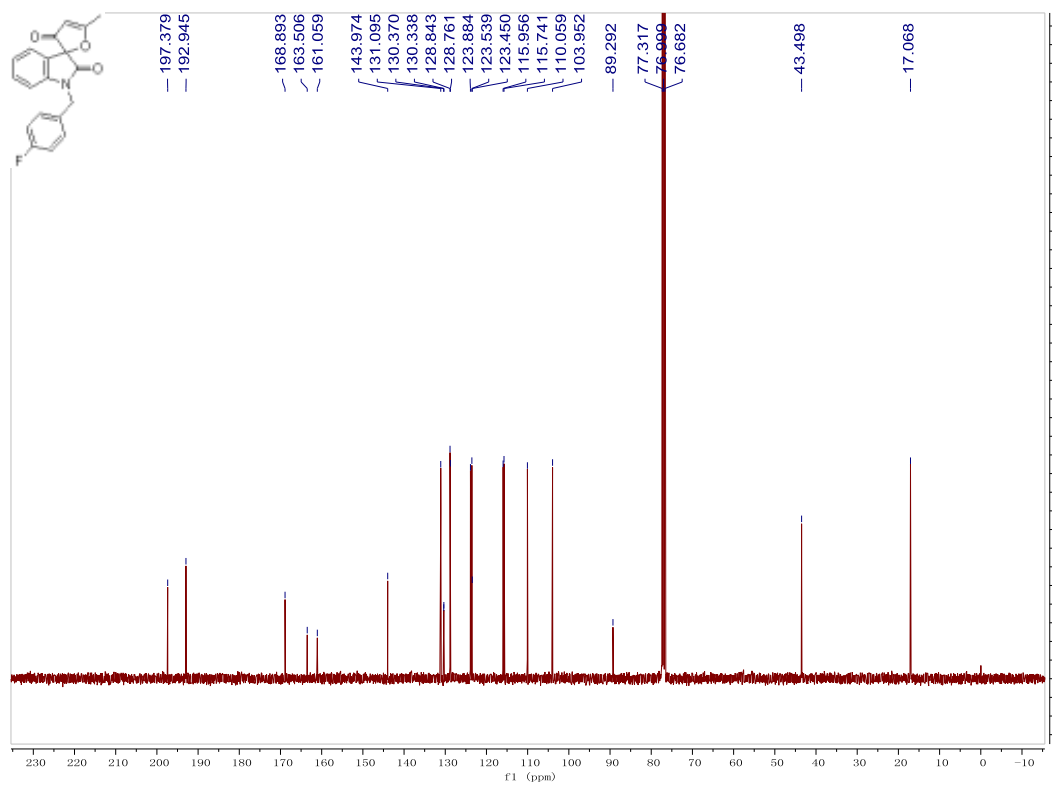

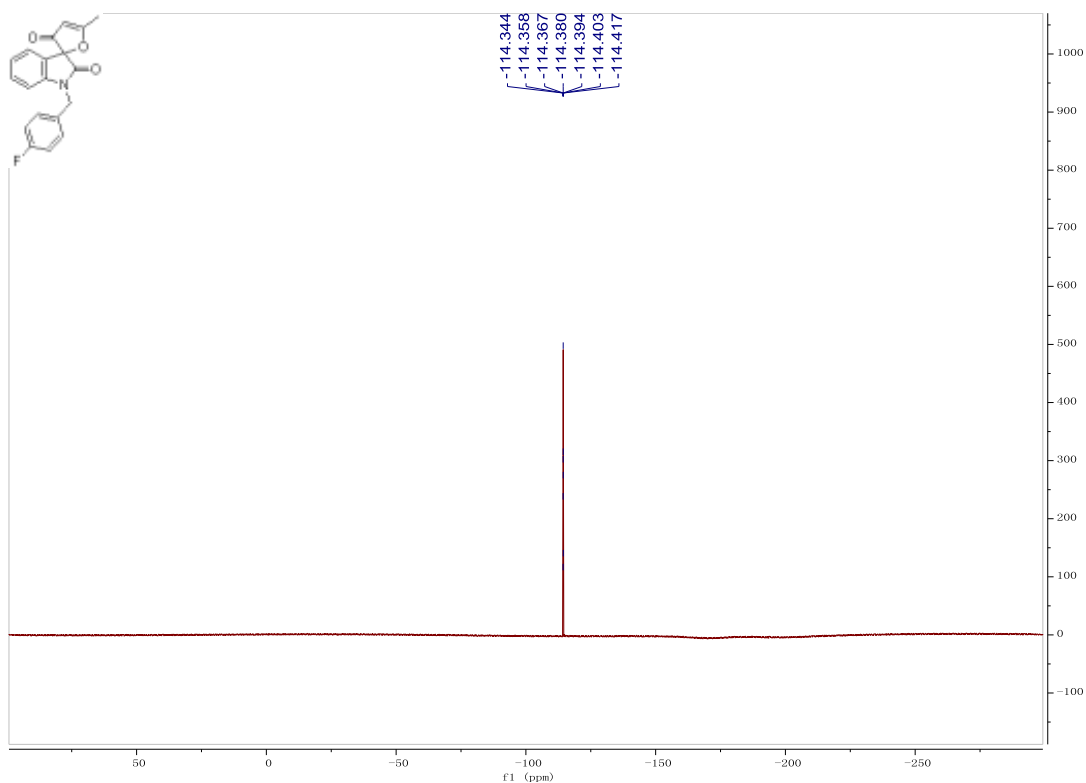

实验时间: 2018-04-19, 15:26:21  
谱图文件: D:\Sun Yaoliang\co2\17-97-c-rac.org

实验者:  
报告时间: 2018-04-19, 15:27:03  
积分方法: 面积归一法

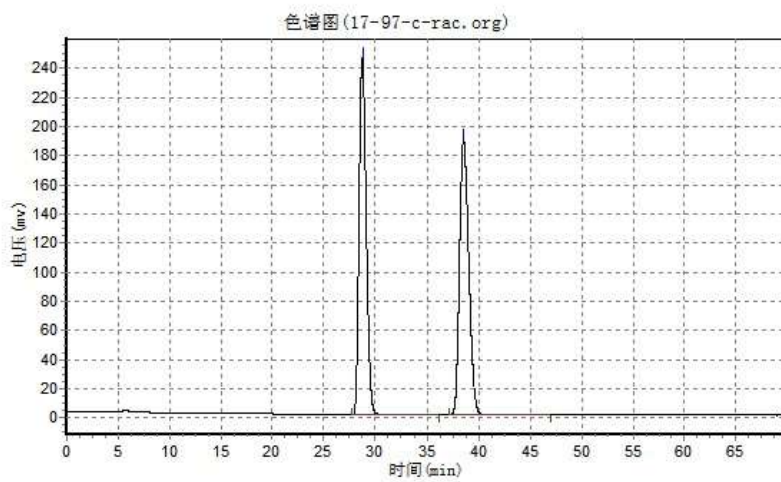

分析结果表

| 峰号 | 峰名 | 保留时间   | 峰高         | 峰面积          | 含量       |
|----|----|--------|------------|--------------|----------|
| 1  |    | 28.790 | 244676.500 | 11842563.000 | 50.1330  |
| 2  |    | 38.523 | 187981.359 | 11779747.000 | 49.8670  |
| 总计 |    |        | 432657.859 | 23622310.000 | 100.0000 |

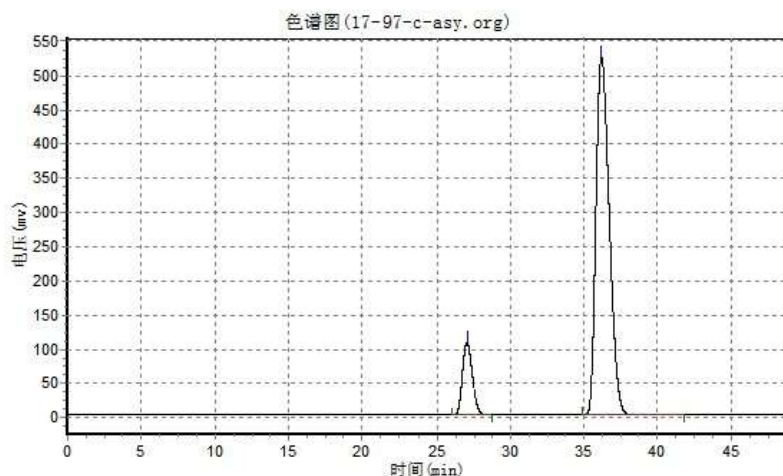

分析结果表

| 峰号 | 峰名 | 保留时间   | 峰高         | 峰面积          | 含量       |
|----|----|--------|------------|--------------|----------|
| 1  |    | 27.065 | 105601.984 | 4989027.500  | 13.1351  |
| 2  |    | 36.198 | 522805.469 | 32993248.000 | 86.8649  |
| 总计 |    |        | 628407.453 | 37982275.500 | 100.0000 |

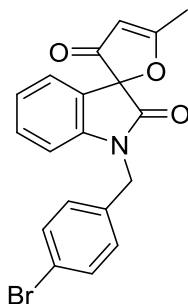

### 1'-(4-bromobenzyl)-5-methyl-3H-spiro[furan-2,3'-indoline]-2',3-dione (3i)

A white solid, 91% yield (70 mg). M.p.: 163-165 °C. <sup>1</sup>H NMR (CDCl<sub>3</sub>, TMS, 400 MHz) δ 2.46 (s, 3H, CH<sub>3</sub>), 4.77 (d, *J* = 16.0 Hz, 1H, CH<sub>2</sub>), 4.95 (d, *J* = 16.0 Hz, 1H, CH<sub>2</sub>), 5.66 (s, 1H, =CH), 6.69 (d, *J* = 8.0 Hz, 1H, ArH), 7.05 (t, *J* = 7.6 Hz, 1H, ArH), 7.13 (d, *J* = 6.8 Hz, 1H, ArH), 7.21 (d, *J* = 8.4 Hz, 2H, ArH), 7.24-7.29 (m, 1H, ArH), 7.46 (d, *J* = 8.0 Hz, 2H, ArH). <sup>13</sup>C NMR (CDCl<sub>3</sub>, TMS, 100 MHz) δ 17.0, 43.5, 89.2, 103.9, 110.0, 121.7, 123.4, 123.6, 123.9, 128.8, 131.1, 132.0, 133.6, 143.8, 168.9, 193.0, 197.3. IR (EtOH) ν 3063, 2920, 2841, 1732, 1604, 1488, 1164, 1071, 848 cm<sup>-1</sup>. HRMS (ESI) Calcd. For C<sub>19</sub>H<sub>18</sub>BrN<sub>2</sub>O<sub>3</sub><sup>+</sup>(M+NH<sub>4</sub>)<sup>+</sup> requires 401.0495, Found: 401.0491. [α]<sub>D</sub><sup>25</sup> = +172.50 (c 0.04, CH<sub>2</sub>Cl<sub>2</sub>) for 66% *ee*; Enantiomeric excess was determined by HPLC with a Chiralcel AD-H column, Hexane/<sup>i</sup>PrOH = 90/10, 0.7 mL/min, 254 nm, *t*<sub>minor</sub> = 86.149 min, *t*<sub>major</sub> = 103.320 min.



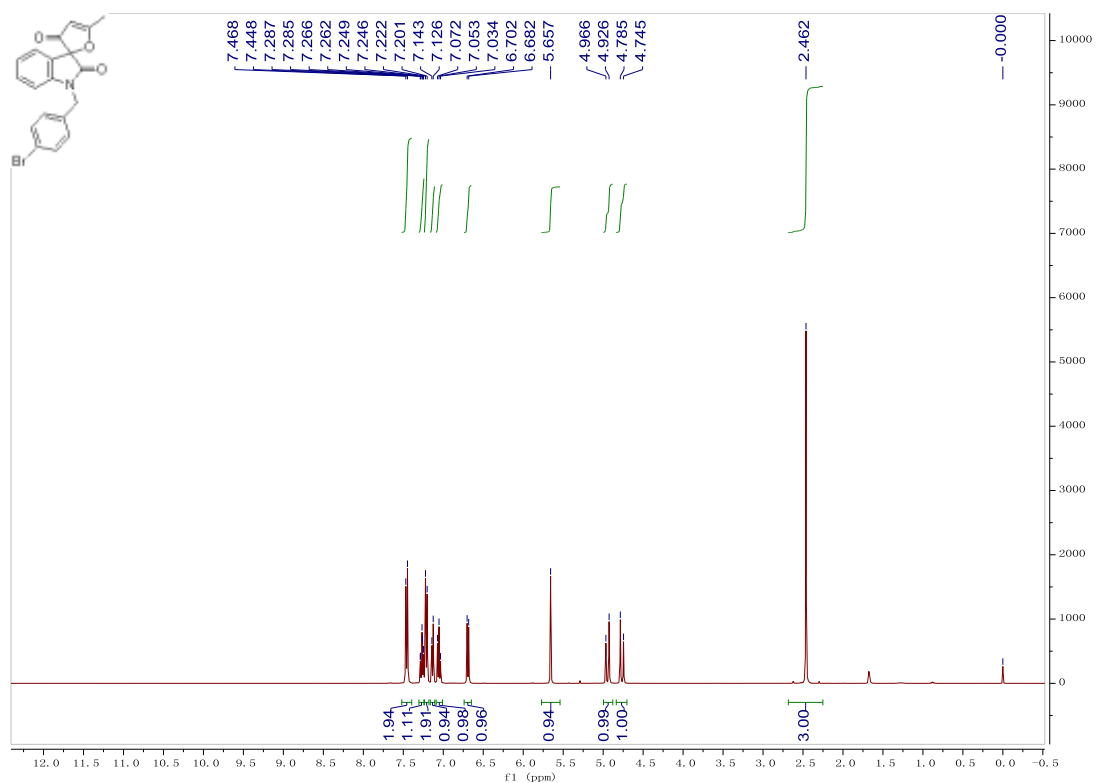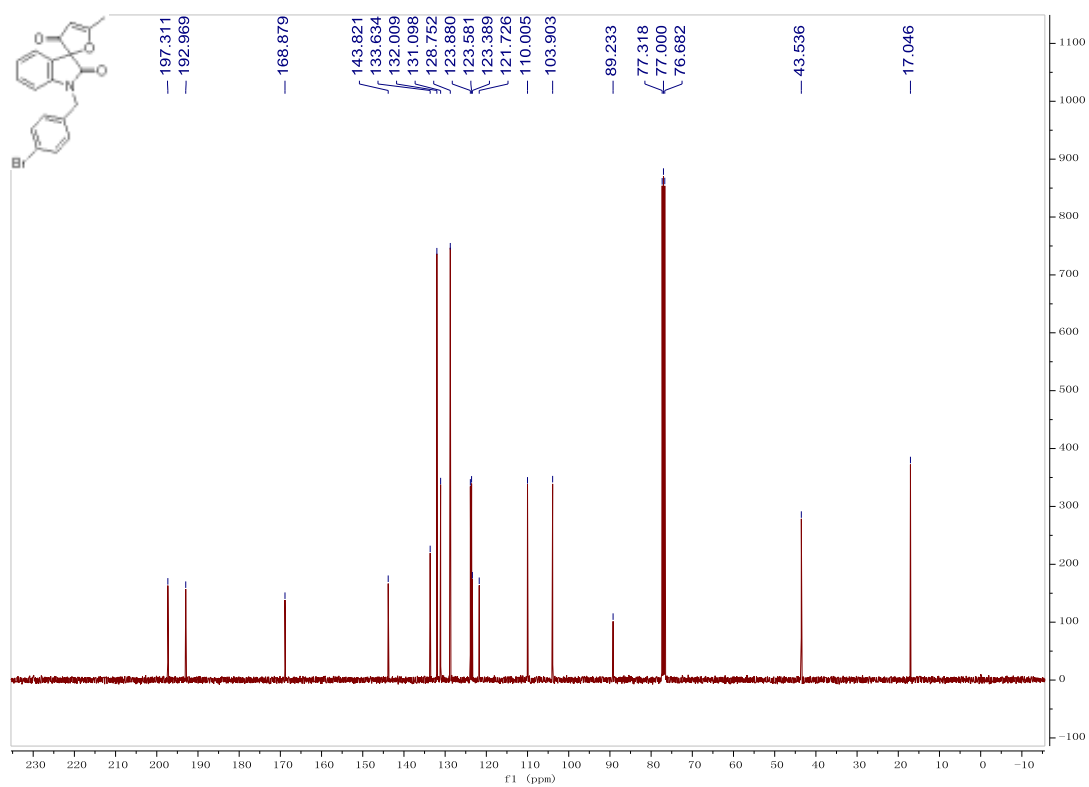

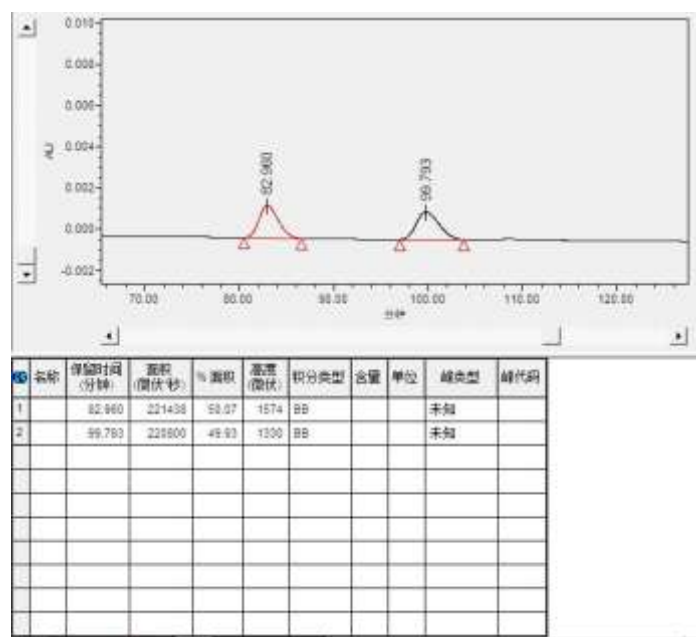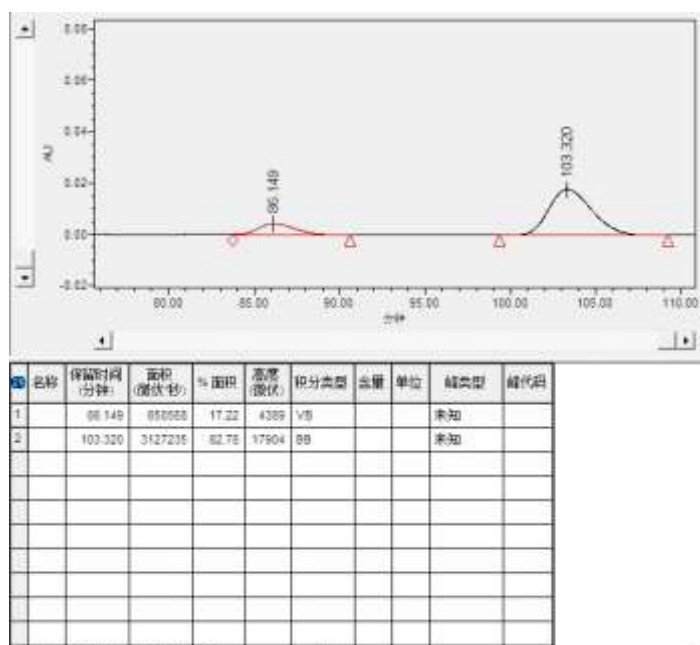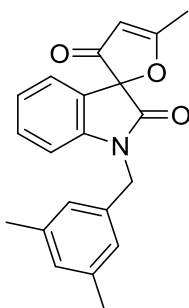

**1'-(3,5-dimethylbenzyl)-5-methyl-3H-spiro[furan-2,3'-indoline]-2',3-dione (3k)**

A white solid, 95% yield (63 mg). M.p.: 134-135 °C. <sup>1</sup>H NMR (CDCl<sub>3</sub>, TMS, 400 MHz) δ 2.29 (s,

6H, CH<sub>3</sub>), 2.47 (s, 3H, CH<sub>3</sub>), 4.80 (d, *J* = 15.6 Hz, 1H, CH<sub>2</sub>), 4.88 (d, *J* = 15.6 Hz, 1H, CH<sub>2</sub>), 5.66 (s, 1H, =CH), 6.76 (d, *J* = 8.0 Hz, 1H, ArH), 6.90 (s, 1H, ArH), 6.94 (s, 2H, ArH), 7.04 (dt, *J* = 0.8, 7.6 Hz, 1H, ArH), 7.12 (dd, *J* = 0.8, 7.6 Hz, 1H, ArH), 7.27 (dt, *J* = 1.2, 7.6 Hz, 1H, ArH). <sup>13</sup>C NMR (CDCl<sub>3</sub>, TMS, 100 MHz) δ 17.1, 21.3, 44.2, 89.4, 104.0, 110.3, 123.3, 123.5, 123.8, 124.9, 129.5, 131.1, 134.5, 138.5, 144.4, 168.9, 192.8, 197.5. IR (EtOH) ν 2956, 2922, 2849, 1735, 1605, 1484, 1380, 1190, 1017, 936 cm<sup>-1</sup>. HRMS (ESI) Calcd. For C<sub>21</sub>H<sub>23</sub>N<sub>2</sub>O<sub>3</sub><sup>+</sup>(M+NH<sub>4</sub>)<sup>+</sup> requires 351.1703, Found: 351.1696

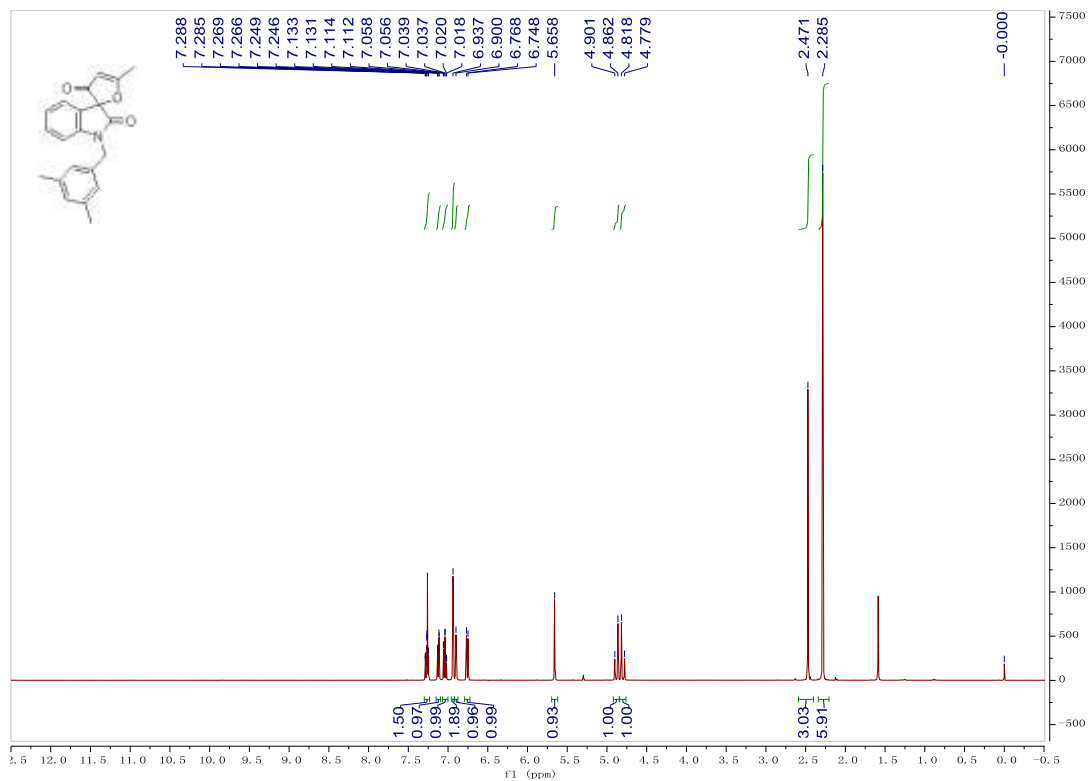

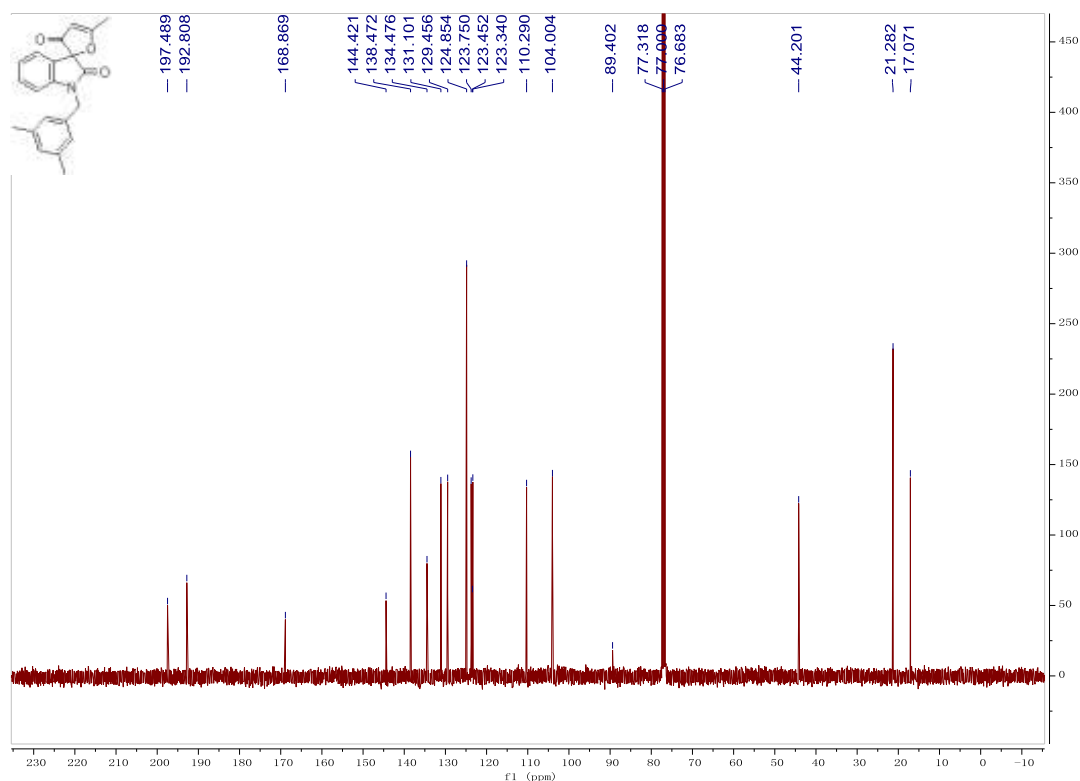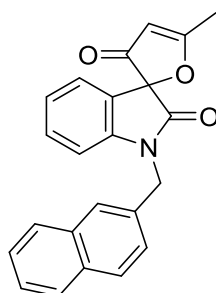

### 5-methyl-1'-(naphthalen-2-ylmethyl)-3H-spiro[furan-2,3'-indoline]-2',3-dione (3m)

A white solid, 91% yield (65 mg). M.p.: 154-156 °C.  $^1\text{H}$  NMR ( $\text{CDCl}_3$ , TMS, 400 MHz)  $\delta$  2.48 (s, 3H,  $\text{CH}_3$ ), 5.28 (d,  $J = 16.4$  Hz, 1H,  $\text{CH}_2$ ), 5.51 (d,  $J = 16.4$  Hz, 1H,  $\text{CH}_2$ ), 5.68 (s, 1H, =CH), 6.67 (d,  $J = 7.6$  Hz, 1H, ArH), 7.04 (dt,  $J = 0.8, 7.2$  Hz, 1H, ArH), 7.15-7.22 (m, 2H, ArH), 7.38-7.44 (m, 2H, ArH), 7.51-7.62 (m, 2H, ArH), 7.79 (t,  $J = 4.4$  Hz, 1H, ArH), 7.89 (d,  $J = 7.6$  Hz, 1H, ArH), 8.04 (d,  $J = 8.4$  Hz, 1H, ArH).  $^{13}\text{C}$  NMR ( $\text{CDCl}_3$ , TMS, 100 MHz)  $\delta$  17.1, 42.2, 89.4, 104.0, 110.4, 122.5, 123.45, 123.47, 123.8, 124.0, 125.5, 126.0, 126.5, 128.3, 128.9, 129.1, 130.7, 131.1, 133.7, 144.5, 169.0, 192.9, 197.4. IR (EtOH)  $\nu$  2922, 1731, 1702, 1516, 1487, 1359, 1248, 1165, 1113, 1008, 990  $\text{cm}^{-1}$ . HRMS (ESI) Calcd. For  $\text{C}_{23}\text{H}_{21}\text{N}_2\text{O}_3^{+1}(\text{M}+\text{NH}_4)^+$  requires 373.1547, Found: 373.1541.

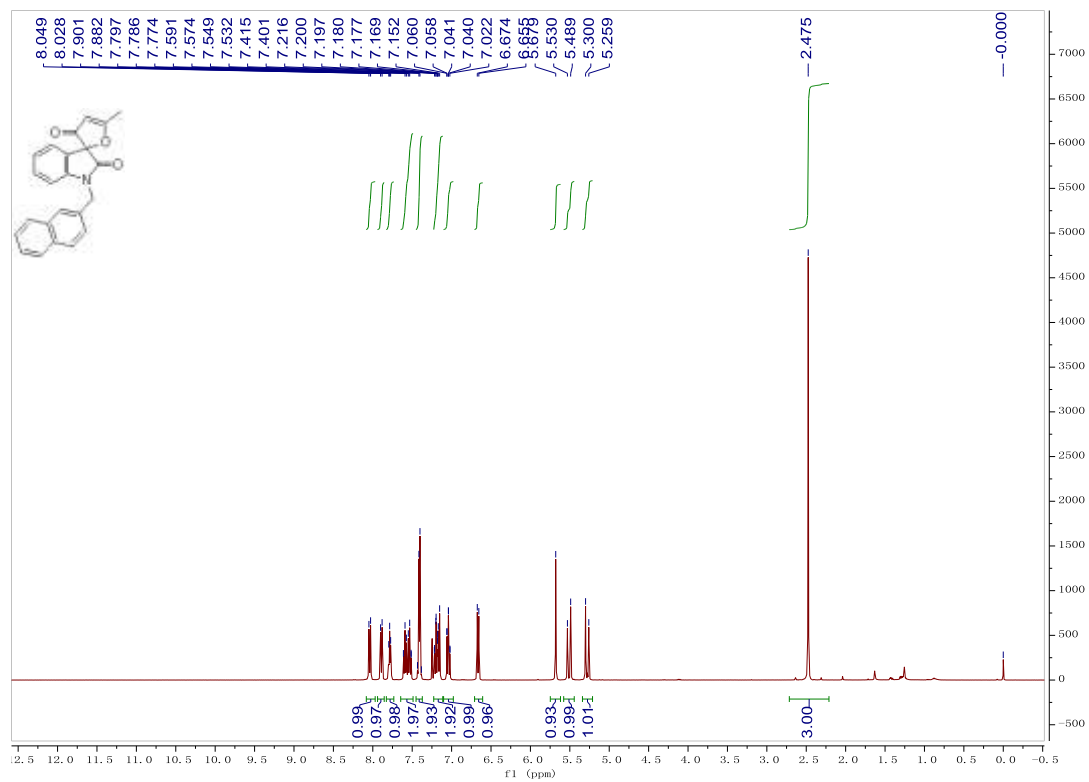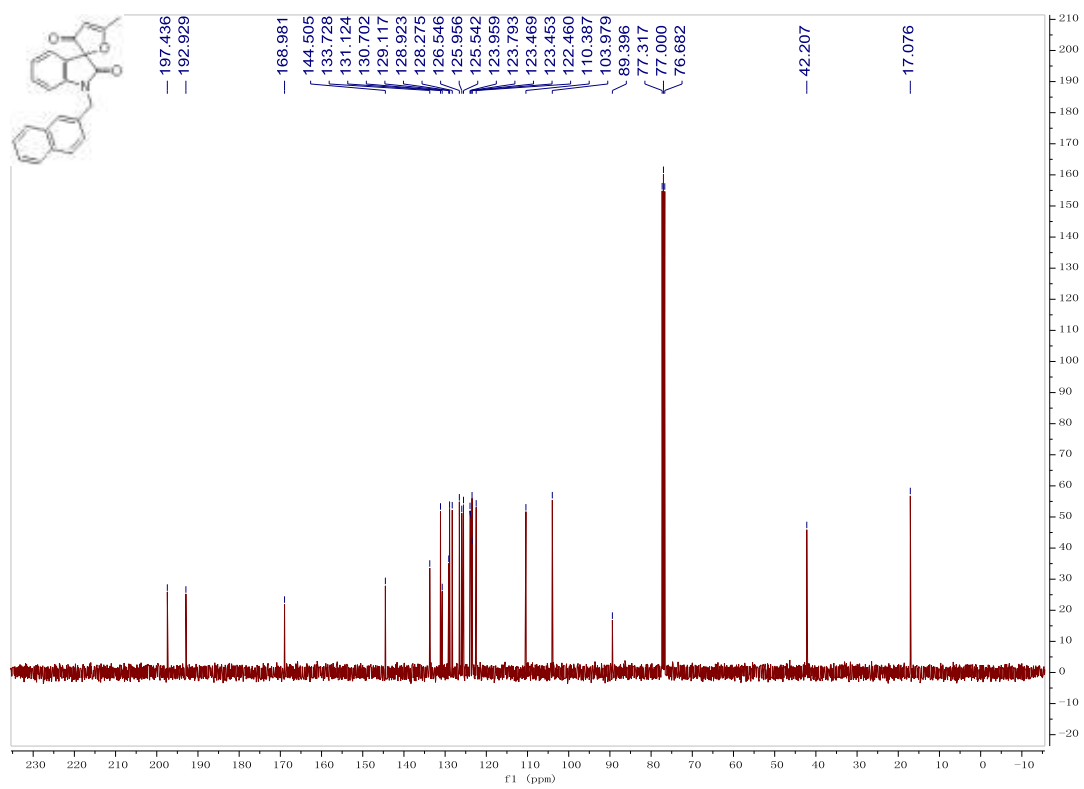

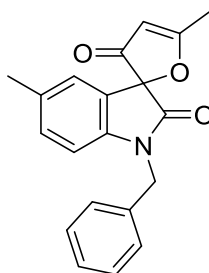

**1'-benzyl-5,5'-dimethyl-3H-spiro[furan-2,3'-indoline]-2',3-dione (3o)**

A white solid, 87% yield (56 mg). M.p.: 126-128 °C. <sup>1</sup>H NMR (CDCl<sub>3</sub>, TMS, 400 MHz) δ 2.26 (s, 3H, CH<sub>3</sub>), 2.47 (s, 3H, CH<sub>3</sub>), 4.84 (d, *J* = 15.6 Hz, 1H, CH<sub>2</sub>), 4.96 (d, *J* = 15.6 Hz, 1H, CH<sub>2</sub>), 5.66 (s, 1H, =CH), 6.61 (d, *J* = 8.0 Hz, 1H, ArH), 6.95 (s, 1H, ArH), 7.05 (d, *J* = 7.6 Hz, 1H, ArH), 7.24-7.36 (m, 5H, ArH). <sup>13</sup>C NMR (CDCl<sub>3</sub>, TMS, 100 MHz) δ 17.1, 20.9, 44.2, 89.5, 104.0, 110.0, 123.4, 124.5, 127.0, 127.7, 128.9, 131.4, 133.2, 134.7, 141.8, 168.8, 192.8, 197.7. IR (EtOH) ν 2961, 2922, 2850, 1730, 1706, 1603, 1497, 1324, 1157, 940 cm<sup>-1</sup>. HRMS (ESI) Calcd. For C<sub>20</sub>H<sub>21</sub>N<sub>2</sub>O<sub>3</sub><sup>+</sup>(M+NH<sub>4</sub>)<sup>+</sup> requires 337.1547, Found: 337.1540. [α]<sub>D</sub><sup>25</sup> = 27.50 (c 0.04, CH<sub>2</sub>Cl<sub>2</sub>) for 81% *ee*; Enantiomeric excess was determined by HPLC with a Chiralcel AD-H column, Hexane/<sup>i</sup>PrOH = 90/10, 0.7 mL/min, 254 nm, *t*<sub>minor</sub> = 54.875 min, *t*<sub>major</sub> = 126.965 min.

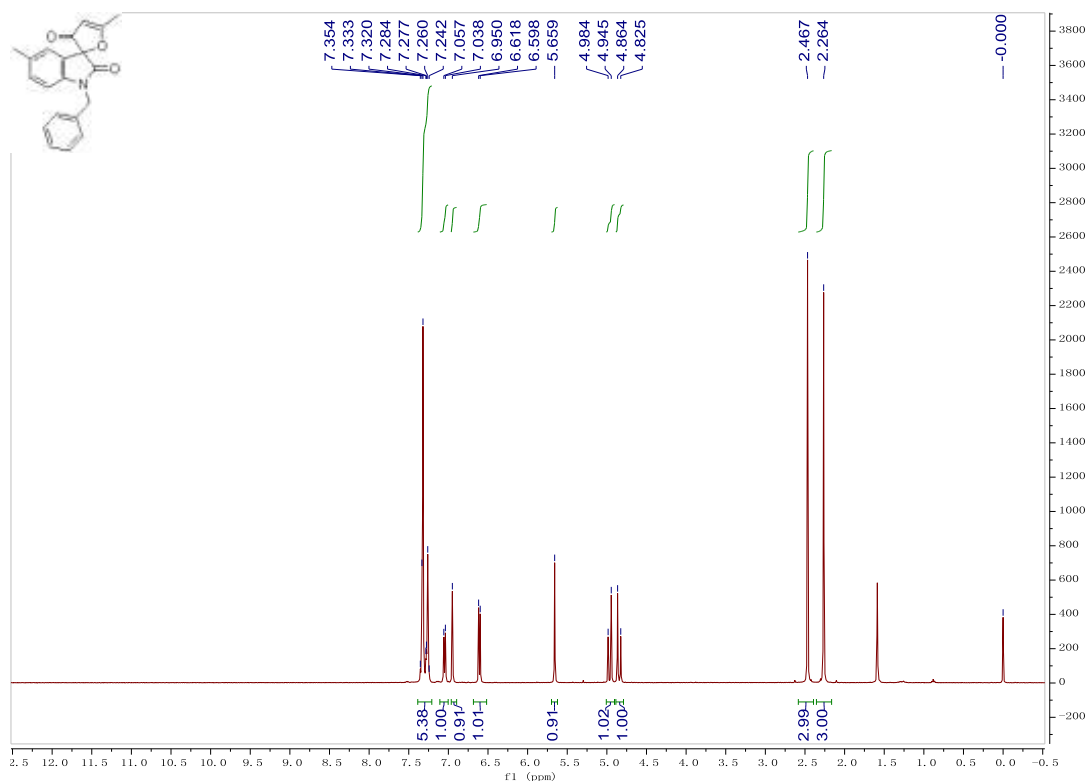

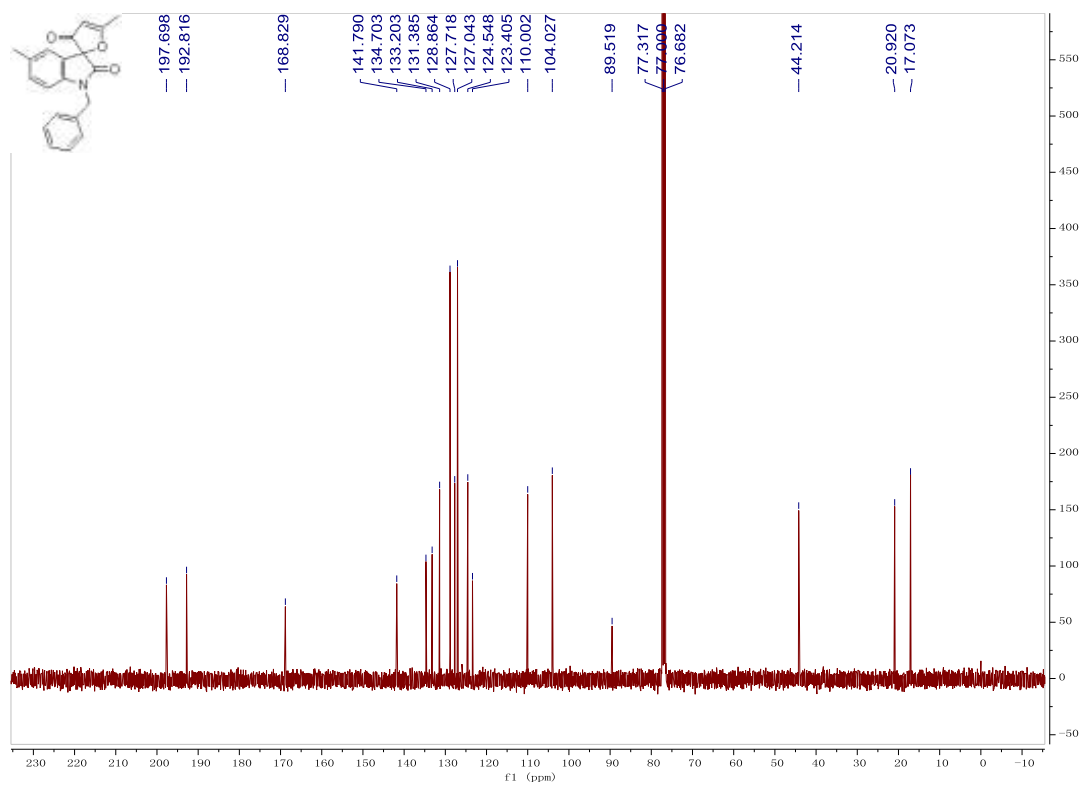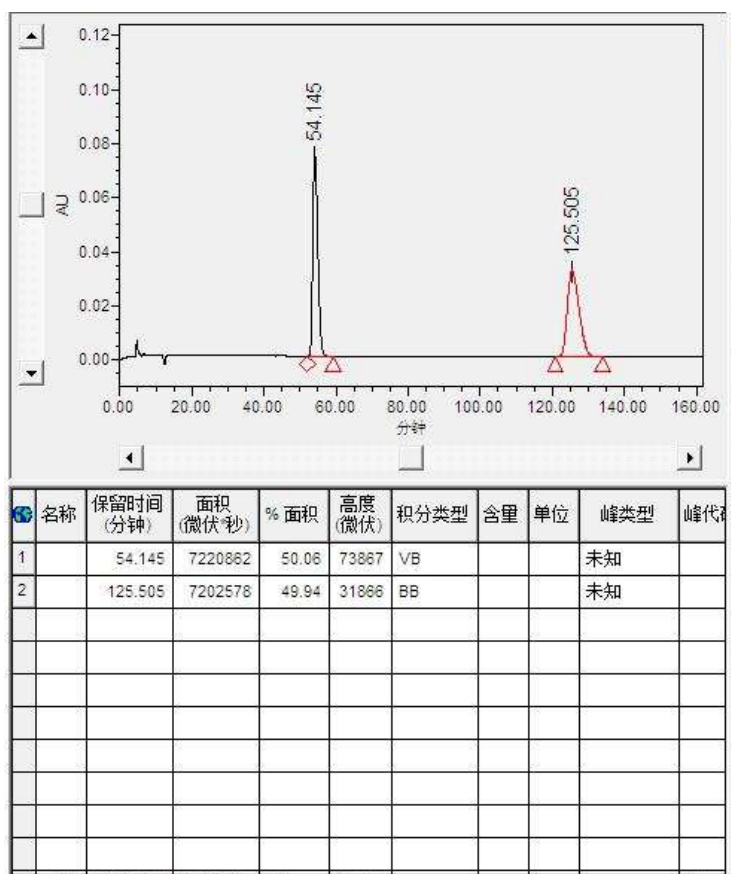

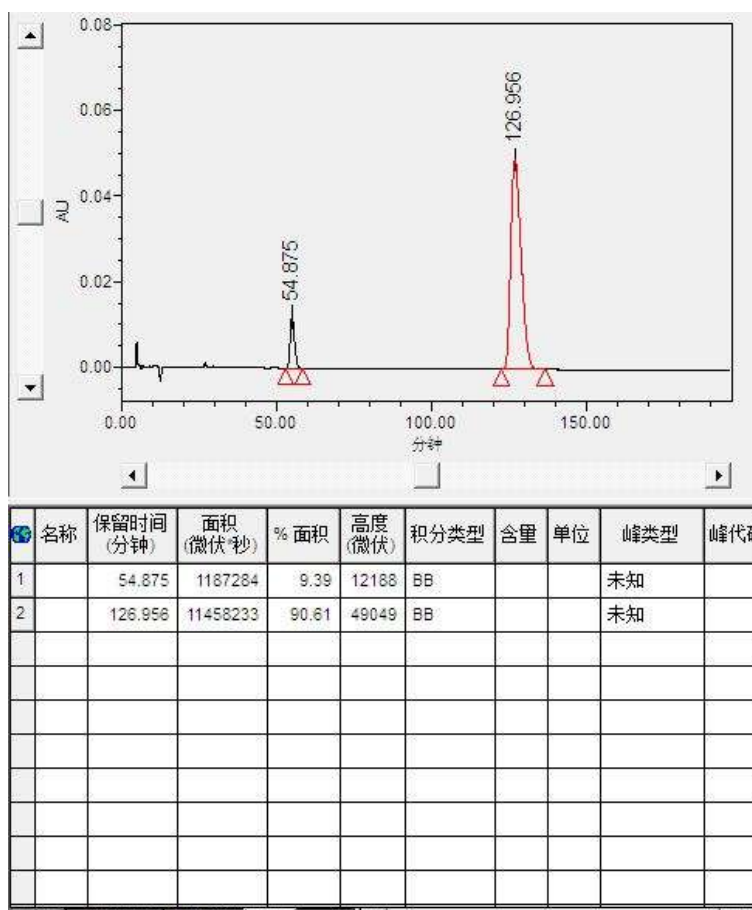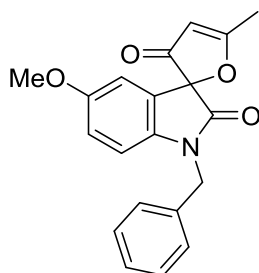

### 1'-benzyl-5'-methoxy-5-methyl-3H-spiro[furan-2,3'-indoline]-2',3-dione (3p)

A white solid, 96% yield (64 mg). M.p.: 144-146 °C.  $^1\text{H}$  NMR ( $\text{CDCl}_3$ , TMS, 400 MHz)  $\delta$  2.46 (s, 3H,  $\text{CH}_3$ ), 3.71 (s, 3H,  $\text{CH}_3$ ), 4.82 (d,  $J = 15.6$  Hz, 1H,  $\text{CH}_2$ ), 4.95 (d,  $J = 15.6$  Hz, 1H,  $\text{CH}_2$ ), 5.66 (s, 1H, =CH), 6.62 (d,  $J = 8.8$  Hz, 1H, ArH), 6.71-6.78 (m, 2H, ArH), 7.24-7.35 (m, 5H, ArH).  $^{13}\text{C}$  NMR ( $\text{CDCl}_3$ , TMS, 100 MHz)  $\delta$  17.0, 44.2, 55.7, 89.5, 103.9, 110.6, 110.8, 115.7, 124.3, 127.0, 127.7, 128.8, 134.6, 137.3, 156.3, 168.6, 192.9, 197.4. IR (EtOH)  $\nu$  3107, 2928, 2854, 1725, 1493, 1326, 1277, 1178, 1078, 1016, 935, 811  $\text{cm}^{-1}$ . HRMS (ESI) Calcd. For  $\text{C}_{20}\text{H}_{21}\text{N}_2\text{O}_4^{+1}(\text{M}+\text{NH}_4)^+$  requires 353.1496, Found: 353.1488.



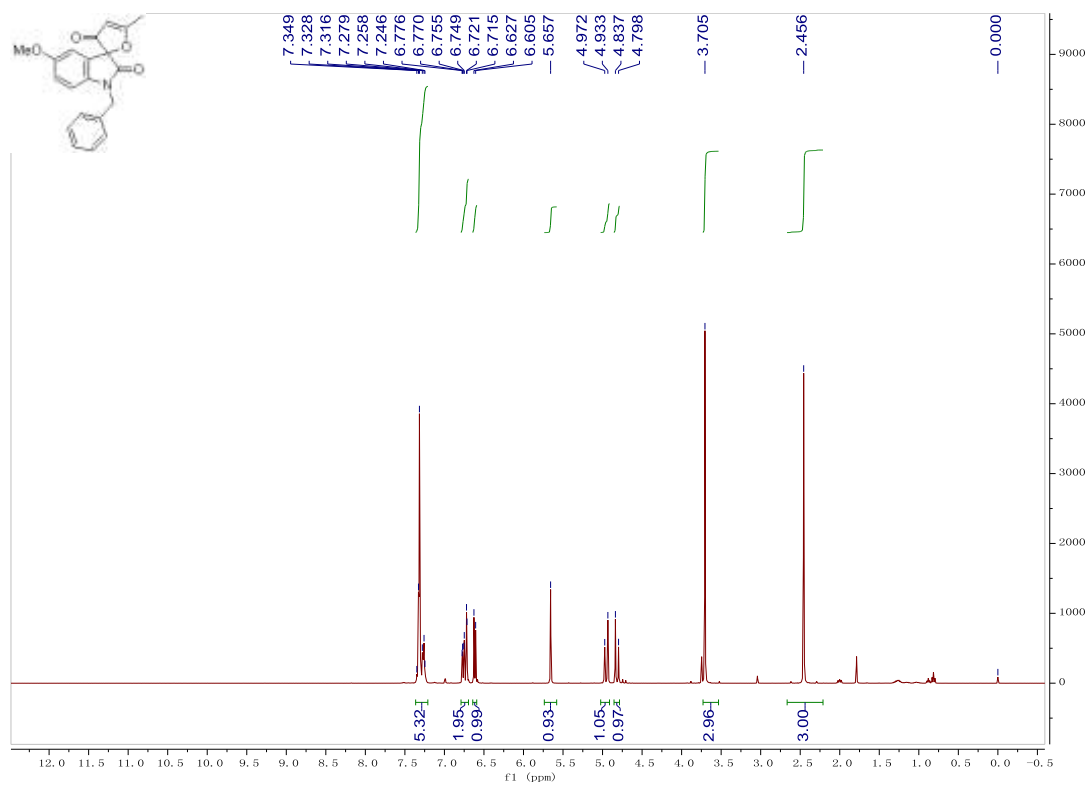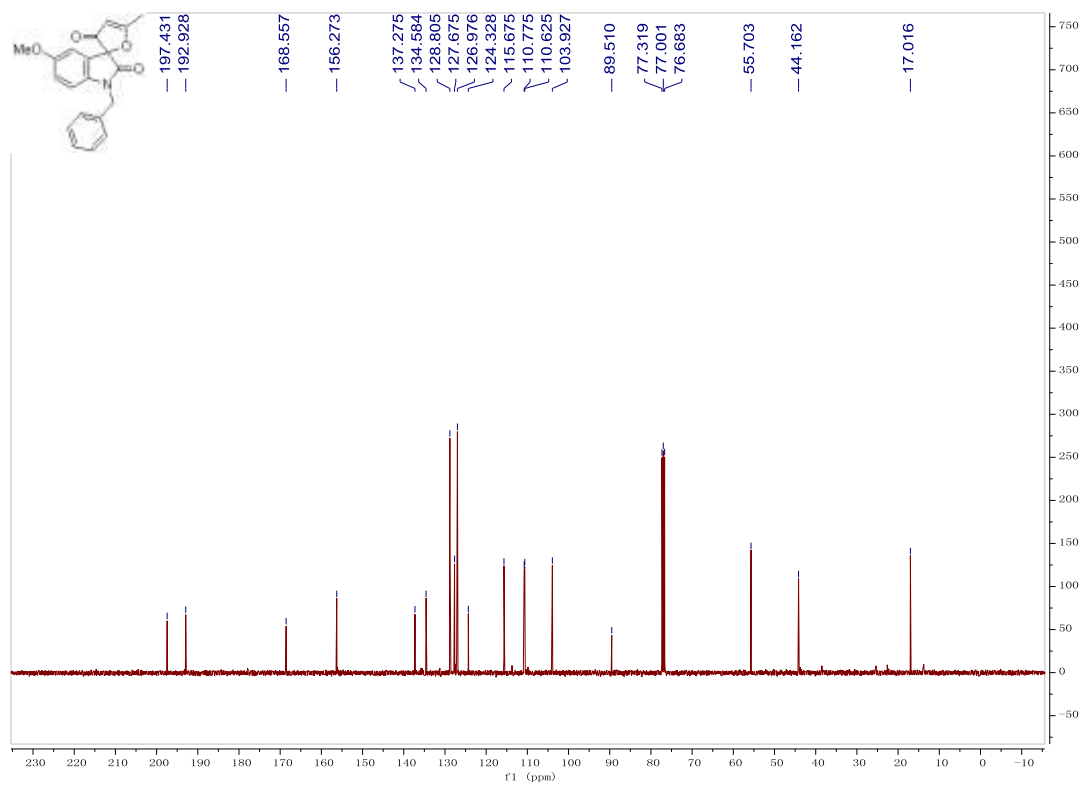

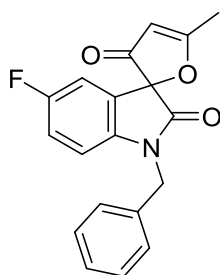

**1'-benzyl-5'-fluoro-5-methyl-3H-spiro[furan-2,3'-indoline]-2',3-dione (3q)**

A white solid, 97% yield (63 mg). M.p.: 122-124 °C. <sup>1</sup>H NMR (CDCl<sub>3</sub>, TMS, 400 MHz) δ 2.47 (s, 3H, CH<sub>3</sub>), 4.83 (d, *J* = 16.0 Hz, 1H, CH<sub>2</sub>), 4.99 (d, *J* = 16.0 Hz, 1H, CH<sub>2</sub>), 5.67 (s, 1H, =CH), 6.64 (dd, *J* = 4.0, 8.4 Hz, 1H, ArH), 6.89 (dd, *J* = 1.2, 7.2 Hz, 1H, ArH), 6.96 (dt, *J* = 2.4, 8.8 Hz, 1H, ArH), 7.26-7.37 (m, 5H, ArH). <sup>13</sup>C NMR (CDCl<sub>3</sub>, TMS, 100 MHz) δ 17.0, 44.4, 89.0, 103.9, 111.0 (d, *J* = 7.9 Hz), 112.0 (d, *J* = 25.3 Hz), 117.4 (d, *J* = 23.4 Hz), 124.7 (d, *J* = 8.5 Hz), 127.0, 127.9, 129.0, 134.2, 140.1 (d, *J* = 2.4 Hz), 159.2 (d, *J* = 241.8 Hz), 168.6, 193.0, 196.8. <sup>19</sup>F NMR (376 MHz, CDCl<sub>3</sub>, CFC1<sub>3</sub>) δ -118.90(-118.84). IR (EtOH) ν 2920, 2850, 1731, 1703, 1604, 1489, 1455, 1382, 1273, 1122, 1017, 935, 734, 668 cm<sup>-1</sup>. HRMS (ESI) Calcd. For C<sub>19</sub>H<sub>18</sub>FN<sub>2</sub>O<sub>3</sub><sup>+1</sup>(M+NH<sub>4</sub>)<sup>+</sup> requires 341.1296, Found: 341.1289.

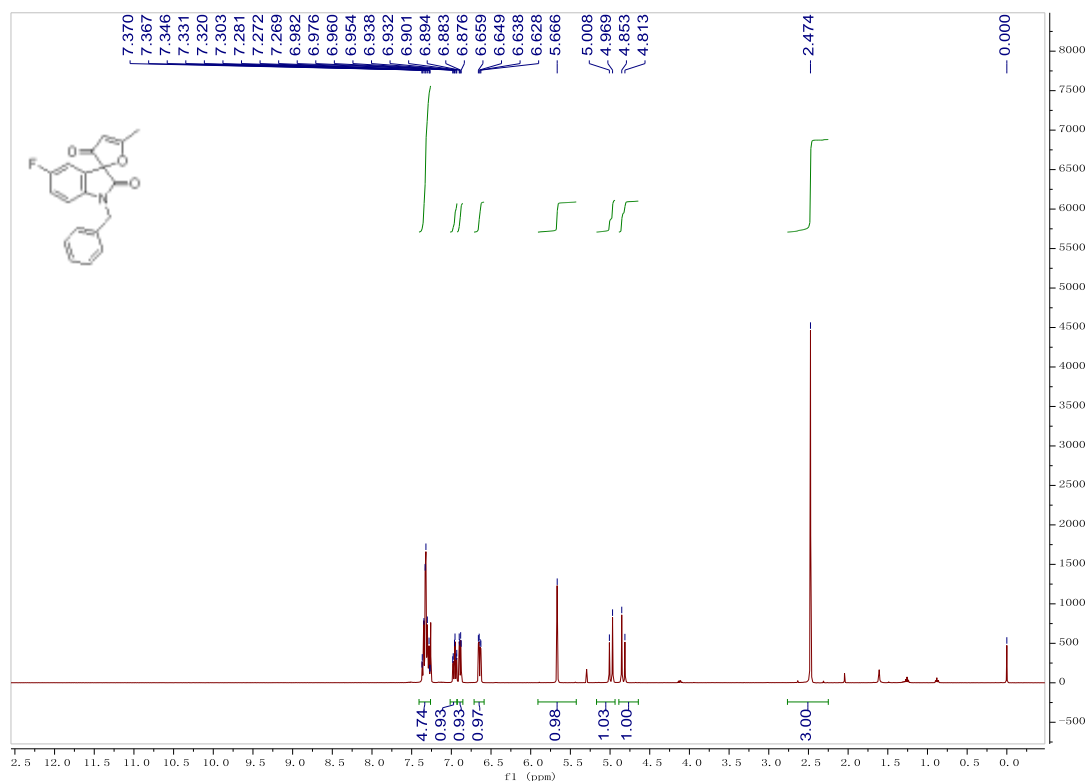

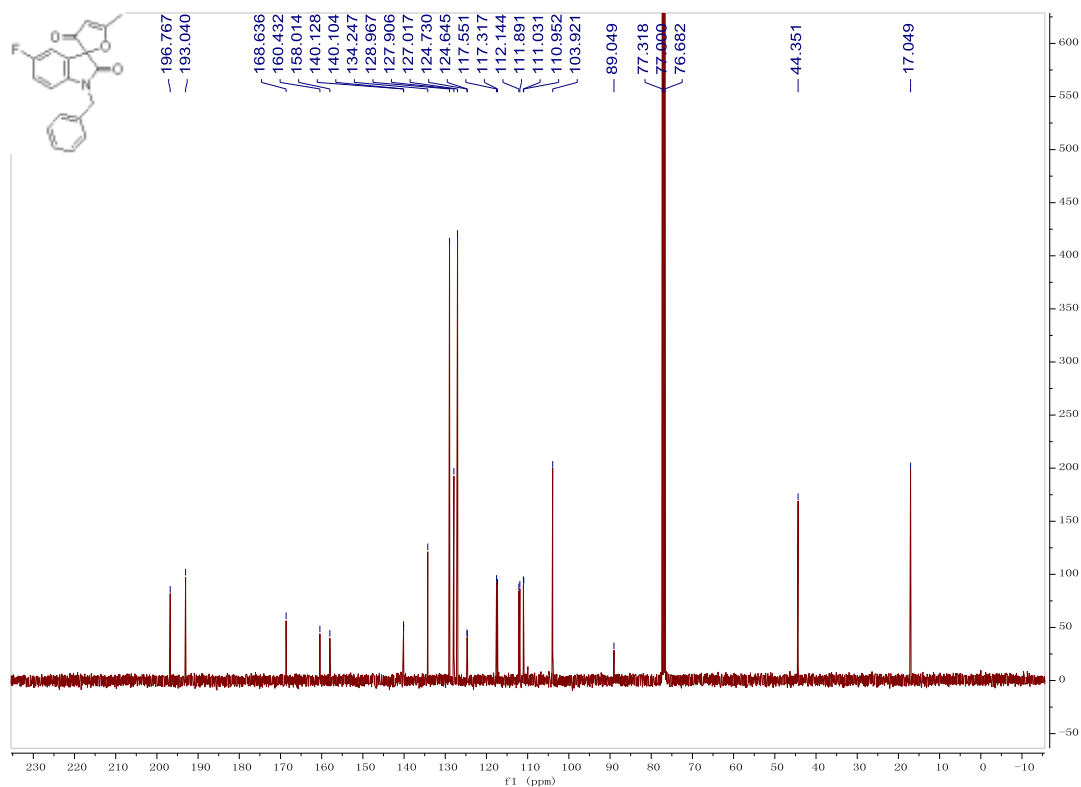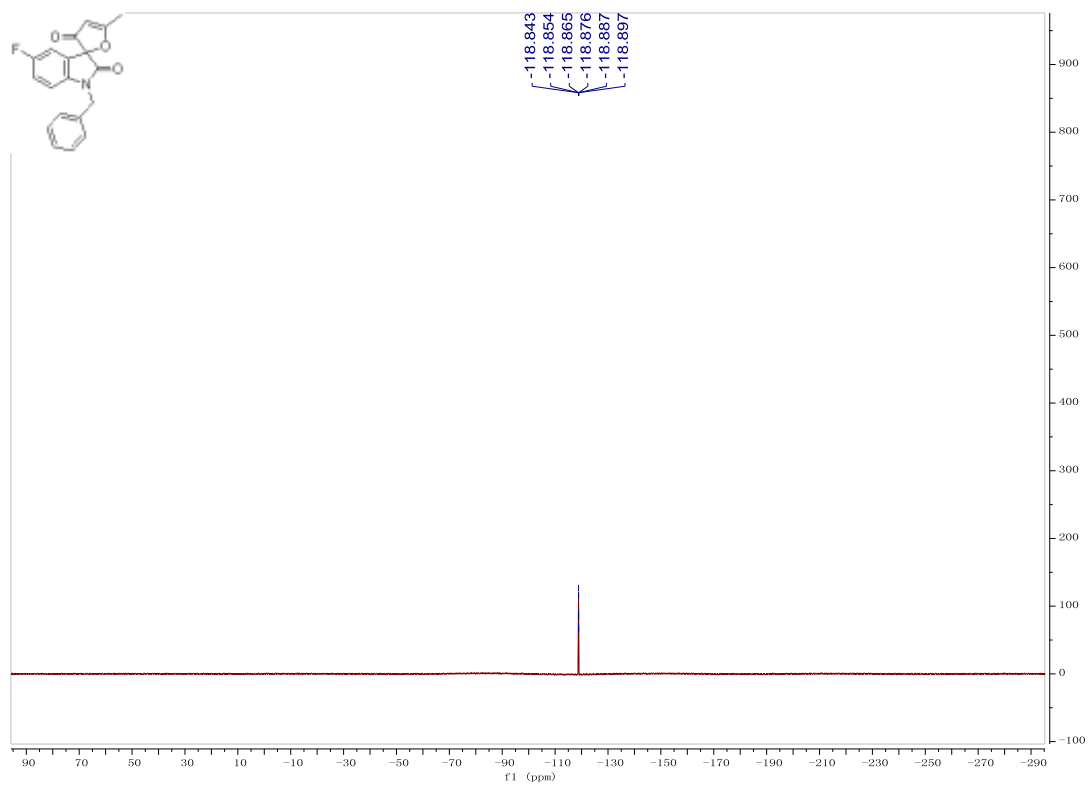

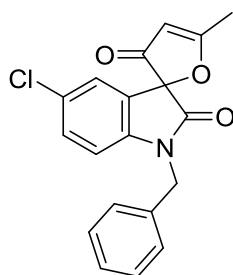

**1'-benzyl-5'-chloro-5-methyl-3H-spiro[furan-2,3'-indoline]-2',3-dione (3r)**

A white solid, 95% yield (64 mg). M.p.: 143-145 °C. <sup>1</sup>H NMR (CDCl<sub>3</sub>, TMS, 400 MHz) δ 2.48 (s, 3H, CH<sub>3</sub>), 4.84 (d, *J* = 16.0 Hz, 1H, CH<sub>2</sub>), 4.99 (d, *J* = 16.0 Hz, 1H, CH<sub>2</sub>), 5.67 (s, 1H, =CH), 6.64 (d, *J* = 8.4 Hz, 1H, ArH), 7.12 (d, *J* = 2.0 Hz, 1H, ArH), 7.21-7.37 (m, 6H, ArH). <sup>13</sup>C NMR (CDCl<sub>3</sub>, TMS, 100 MHz) δ 17.1, 44.4, 88.8, 104.0, 111.3, 124.4, 124.9, 127.1, 128.0, 128.9, 129.0, 131.0, 134.2, 142.7, 168.5, 193.1, 196.7. IR (EtOH) ν 3110, 3063, 2921, 2850, 1735, 1705, 1484, 1433, 1381, 1260, 1130, 960 cm<sup>-1</sup>. HRMS (ESI) Calcd. For C<sub>19</sub>H<sub>18</sub>ClN<sub>2</sub>O<sub>3</sub><sup>+1</sup>(M+NH<sub>4</sub>)<sup>+</sup> requires 357.1000, Found: 357.0996.

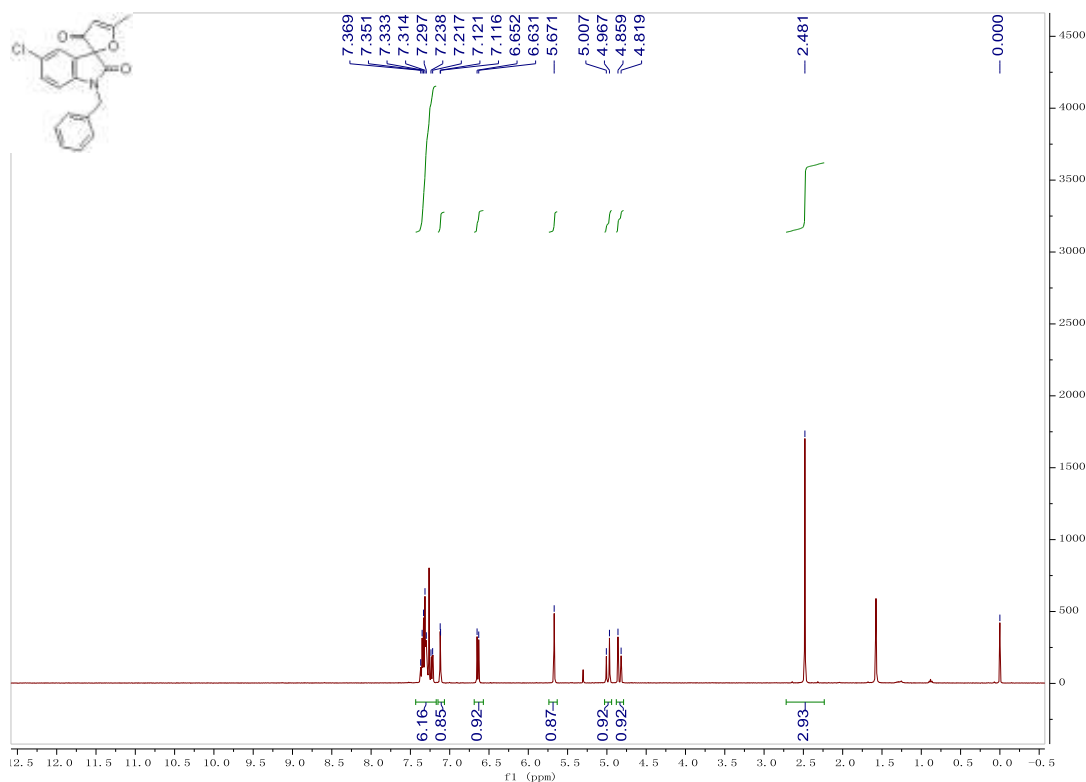

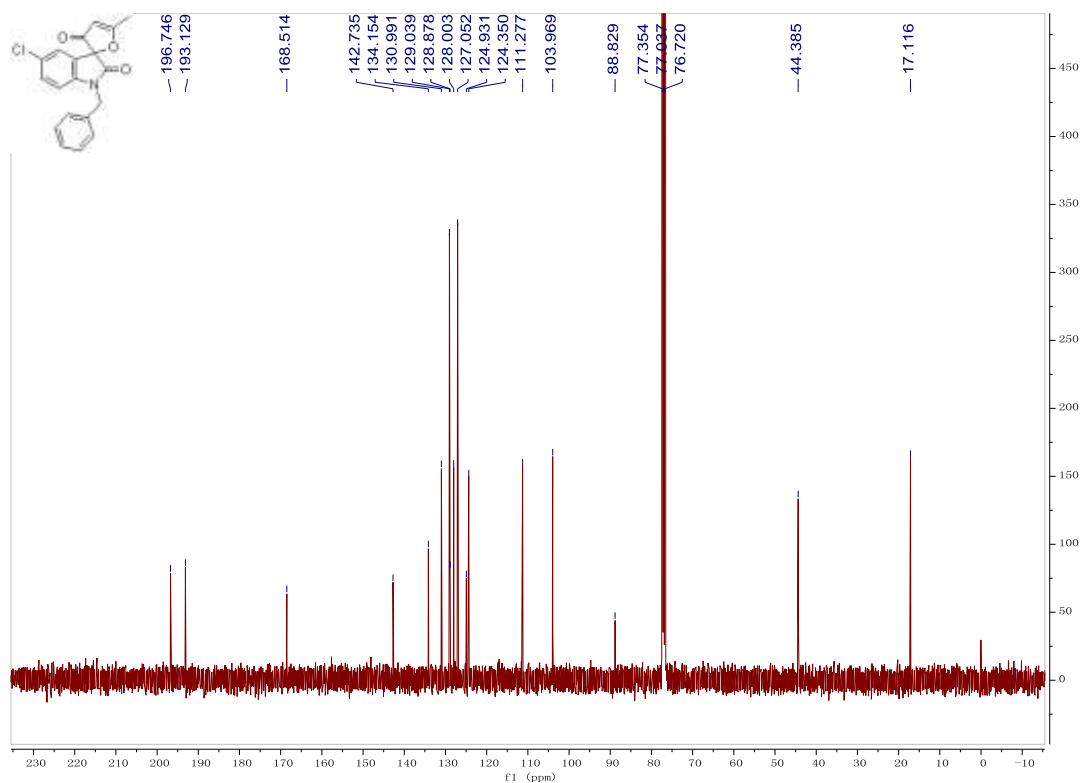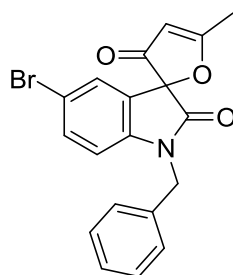

**1'-benzyl-5'-bromo-5-methyl-3H-spiro[furan-2,3'-indoline]-2',3-dione (3s)**

A white solid, 91% yield (70 mg). M.p.: 167-169 °C. <sup>1</sup>H NMR (CDCl<sub>3</sub>, TMS, 400 MHz) δ 2.48 (s, 3H, CH<sub>3</sub>), 4.83 (d, *J* = 15.6 Hz, 1H, CH<sub>2</sub>), 4.98 (d, *J* = 15.6 Hz, 1H, CH<sub>2</sub>), 5.67 (s, 1H, =CH), 6.59 (d, *J* = 8.4 Hz, 1H, ArH), 7.24-7.39 (m, 7H, ArH). <sup>13</sup>C NMR (CDCl<sub>3</sub>, TMS, 100 MHz) δ 17.1, 44.3, 88.7, 103.9, 111.7, 116.0, 125.2, 127.01, 127.03, 128.0, 129.0, 133.8, 134.1, 143.2, 168.4, 193.1, 196.7. IR (EtOH) ν 2920, 2850, 1736, 1704, 1603, 1455, 1427, 1381, 1121, 1079, 811 cm<sup>-1</sup>. HRMS (ESI) Calcd. For C<sub>19</sub>H<sub>18</sub>BrN<sub>2</sub>O<sub>3</sub><sup>+1</sup>(M+NH<sub>4</sub>)<sup>+</sup> requires 401.0495, Found: 401.0492.

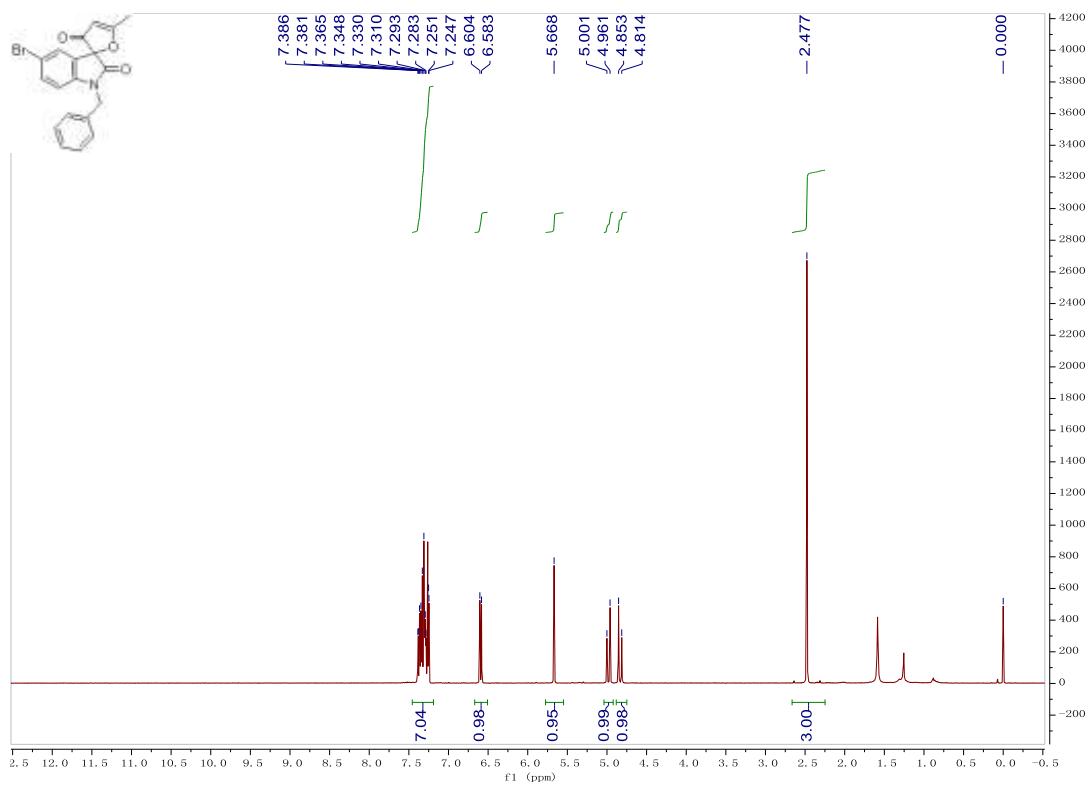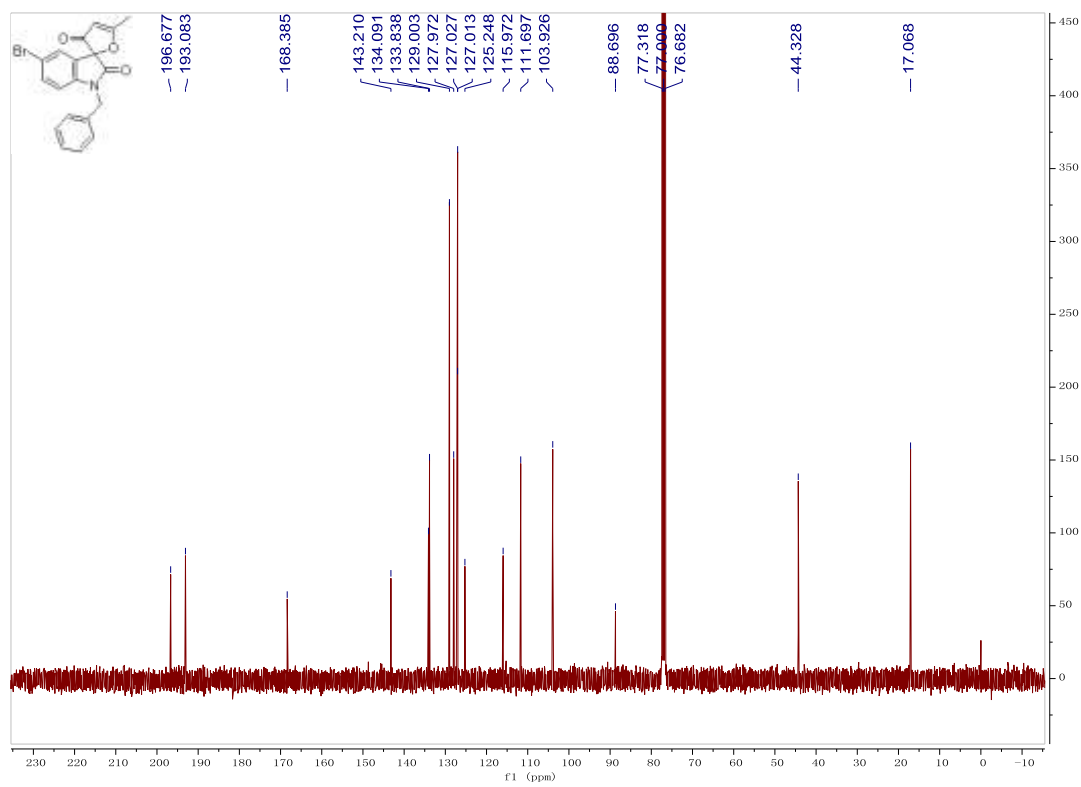

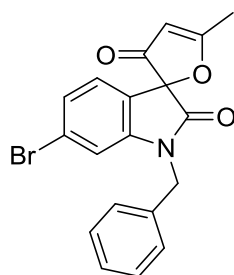

**1'-benzyl-6'-bromo-5-methyl-3H-spiro[furan-2,3'-indoline]-2',3-dione (3t)**

A white solid, 83% yield (64 mg). M.p.: 158-160 °C. <sup>1</sup>H NMR (CDCl<sub>3</sub>, TMS, 400 MHz) δ 2.46 (s, 3H, CH<sub>3</sub>), 4.81 (d, *J* = 16.0 Hz, 1H, CH<sub>2</sub>), 4.97 (d, *J* = 16.0 Hz, 1H, CH<sub>2</sub>), 5.65 (s, 1H, =CH), 6.88 (d, *J* = 1.6 Hz, 1H, ArH), 6.99 (d, *J* = 8.0 Hz, 1H, ArH), 7.19 (dd, *J* = 1.6, 8.0 Hz, 1H, ArH), 7.28-7.39 (m, 5H, ArH). <sup>13</sup>C NMR (CDCl<sub>3</sub>, TMS, 100 MHz) δ 17.1, 44.3, 88.7, 103.9, 113.6, 122.3, 124.9, 125.0, 126.4, 127.0, 128.0, 129.0, 134.0, 145.5, 168.7, 193.0, 196.8. IR (EtOH) ν 3029, 2917, 2844, 1732, 1698, 1654, 1484, 1370, 1317, 1307, 989 cm<sup>-1</sup>. HRMS (ESI) Calcd. For C<sub>19</sub>H<sub>18</sub>BrN<sub>2</sub>O<sub>3</sub><sup>+1</sup>(M+NH<sub>4</sub>)<sup>+</sup> requires 401.0495, Found: 401.0492.

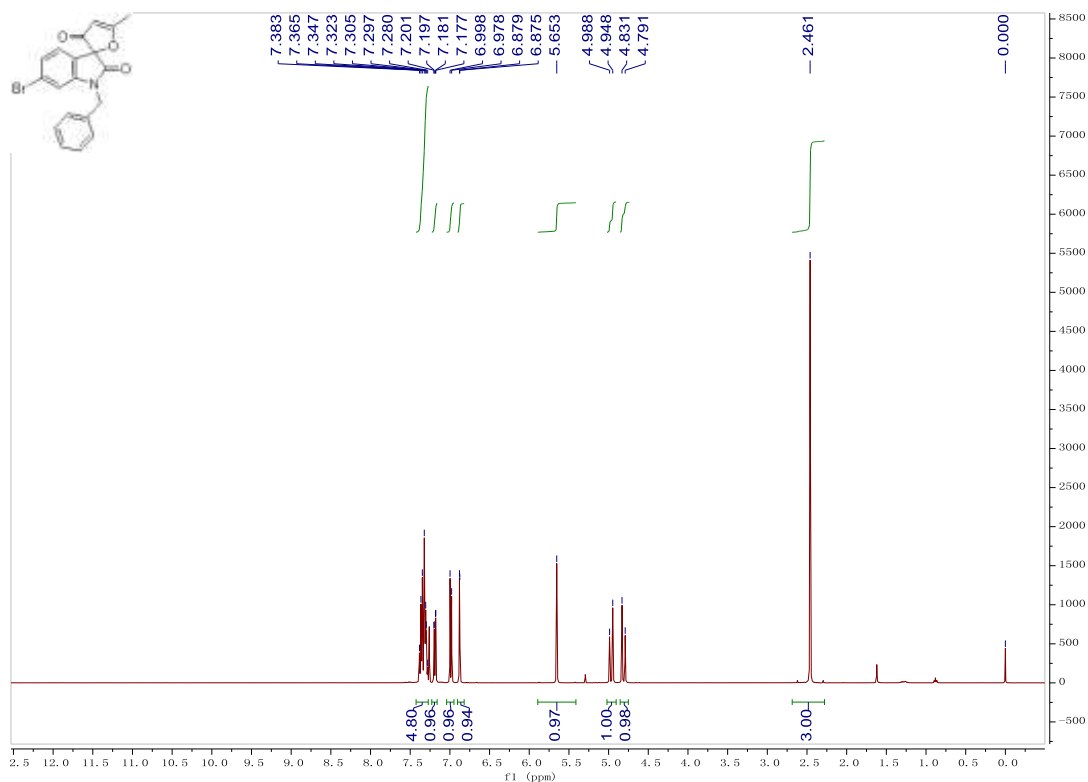

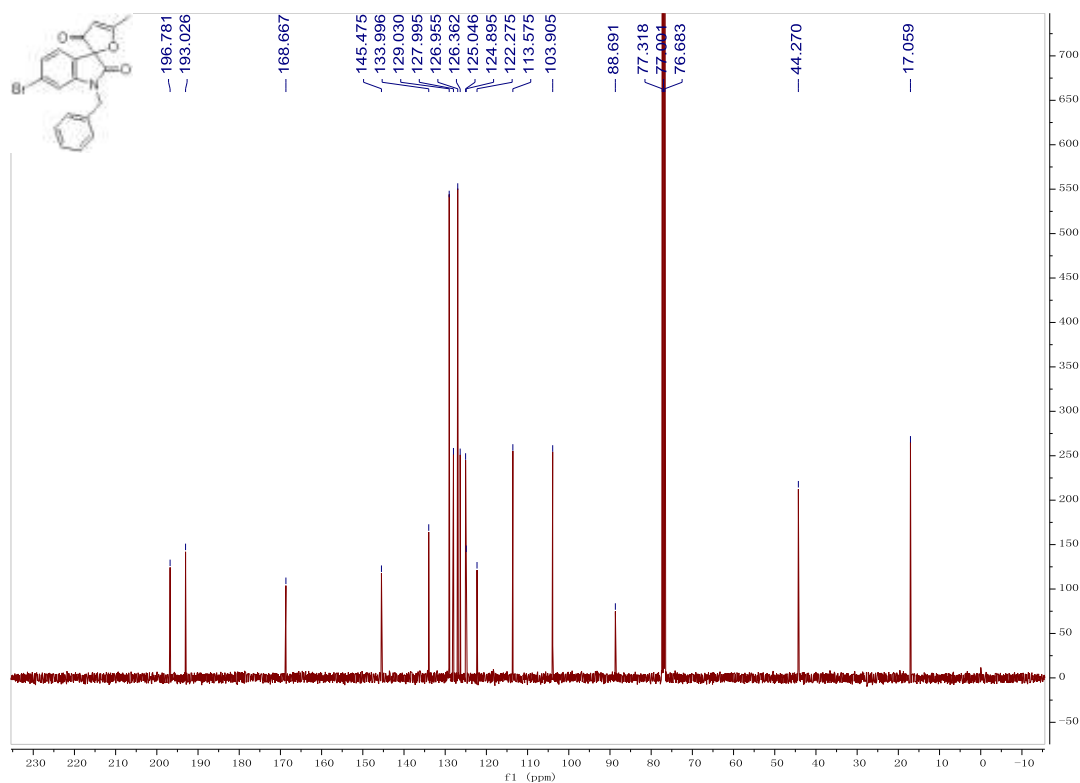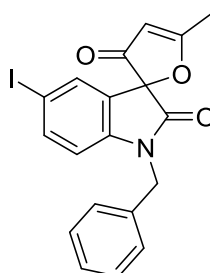

### 1'-benzyl-5'-iodo-5-methyl-3H-spiro[furan-2,3'-indoline]-2',3-dione (**3u**)

A white solid, 91% yield (78 mg). M.p.: 183-185 °C.  $^1\text{H}$  NMR ( $\text{CDCl}_3$ , TMS, 400 MHz)  $\delta$  2.46 (s, 3H,  $\text{CH}_3$ ), 4.82 (d,  $J = 16.0$  Hz, 1H,  $\text{CH}_2$ ), 4.96 (d,  $J = 16.0$  Hz, 1H,  $\text{CH}_2$ ), 5.66 (s, 1H, =CH), 6.49 (d,  $J = 8.4$  Hz, 1H, ArH), 7.25-7.36 (m, 5H, ArH), 7.41 (s, 1H, ArH), 7.55 (d,  $J = 8.0$  Hz, 1H, ArH).  $^{13}\text{C}$  NMR ( $\text{CDCl}_3$ , TMS, 100 MHz)  $\delta$  17.0, 44.2, 85.7, 88.4, 103.9, 112.2, 125.4, 126.9, 127.9, 128.9, 132.4, 134.0, 139.7, 143.8, 168.2, 193.1, 196.7. IR (EtOH)  $\nu$  2921, 2851, 1856, 1734, 1705, 1496, 1479, 1423, 1131, 954, 697  $\text{cm}^{-1}$ . HRMS (ESI) Calcd. For  $\text{C}_{19}\text{H}_{18}\text{IN}_2\text{O}_3$   $^{+1}(\text{M}+\text{NH}_4)^+$  requires 449.0357, Found: 449.0350.



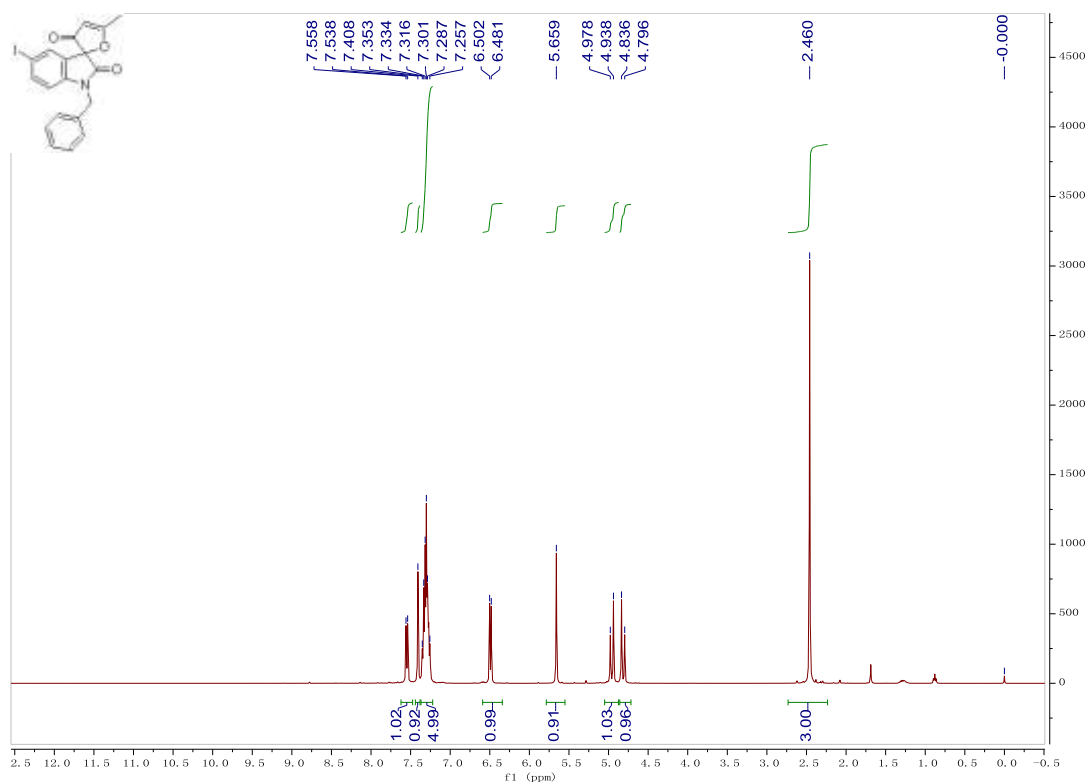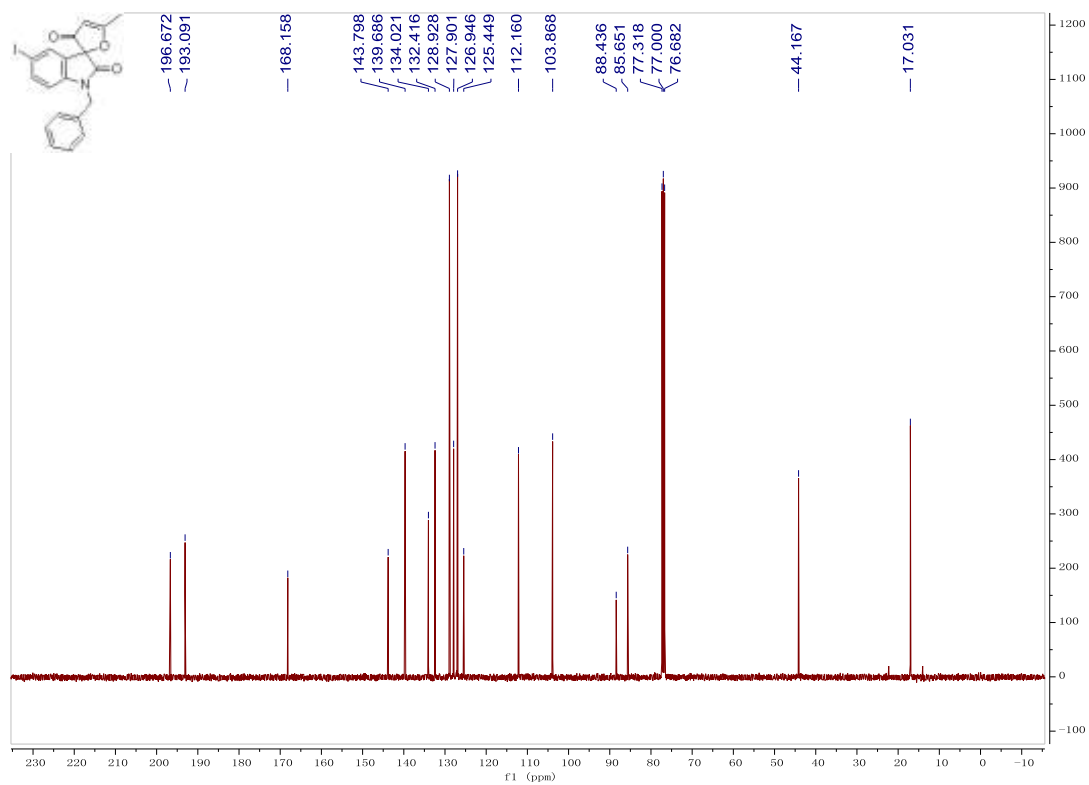

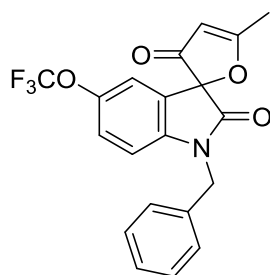

**1'-benzyl-5-methyl-5'-(trifluoromethoxy)-3H-spiro[furan-2,3'-indoline]-2',3-dione (3v)**

A white solid, 94% yield (73 mg). M.p.: 134-136 °C. <sup>1</sup>H NMR (CDCl<sub>3</sub>, TMS, 400 MHz) δ 2.49 (s, 3H, CH<sub>3</sub>), 4.85 (d, *J* = 16.0 Hz, 1H, CH<sub>2</sub>), 5.00 (d, *J* = 16.0 Hz, 1H, CH<sub>2</sub>), 5.68 (s, 1H, =CH), 6.71 (d, *J* = 8.4 Hz, 1H, ArH), 7.02 (s, 1H, ArH), 7.13 (d, *J* = 8.8 Hz, 1H, ArH), 7.27-7.38 (m, 5H, ArH). <sup>13</sup>C NMR (CDCl<sub>3</sub>, TMS, 100 MHz) δ 17.1, 44.4, 88.8, 103.9, 110.9, 117.8, 120.3 (q, *J* = 255.9 Hz), 124.2, 124.7, 127.0, 128.0, 129.0, 134.0, 142.8, 145.0 (q, *J* = 2.1 Hz), 168.7, 193.2, 196.5. <sup>19</sup>F NMR (376 MHz, CDCl<sub>3</sub>, CFCl<sub>3</sub>) δ -58.32. IR (EtOH) ν 2924, 2853, 1710, 1608, 1455, 1325, 1256, 1219, 1162, 1029, 820 cm<sup>-1</sup>. HRMS (ESI) Calcd. For C<sub>20</sub>H<sub>18</sub>F<sub>3</sub>N<sub>2</sub>O<sub>4</sub><sup>+1</sup>(M+NH<sub>4</sub>)<sup>+</sup> requires 407.1213, Found: 407.1205. [α]<sub>D</sub><sup>25</sup> = +11.67 (c 0.06, CH<sub>2</sub>Cl<sub>2</sub>) for 76% *ee*; Enantiomeric excess was determined by HPLC with a Chiralcel AD-H column, Hexane/<sup>i</sup>PrOH = 80/20, 0.7 mL/min, 254 nm, *t*<sub>minor</sub> = 15.790 min, *t*<sub>major</sub> = 29.557 min.

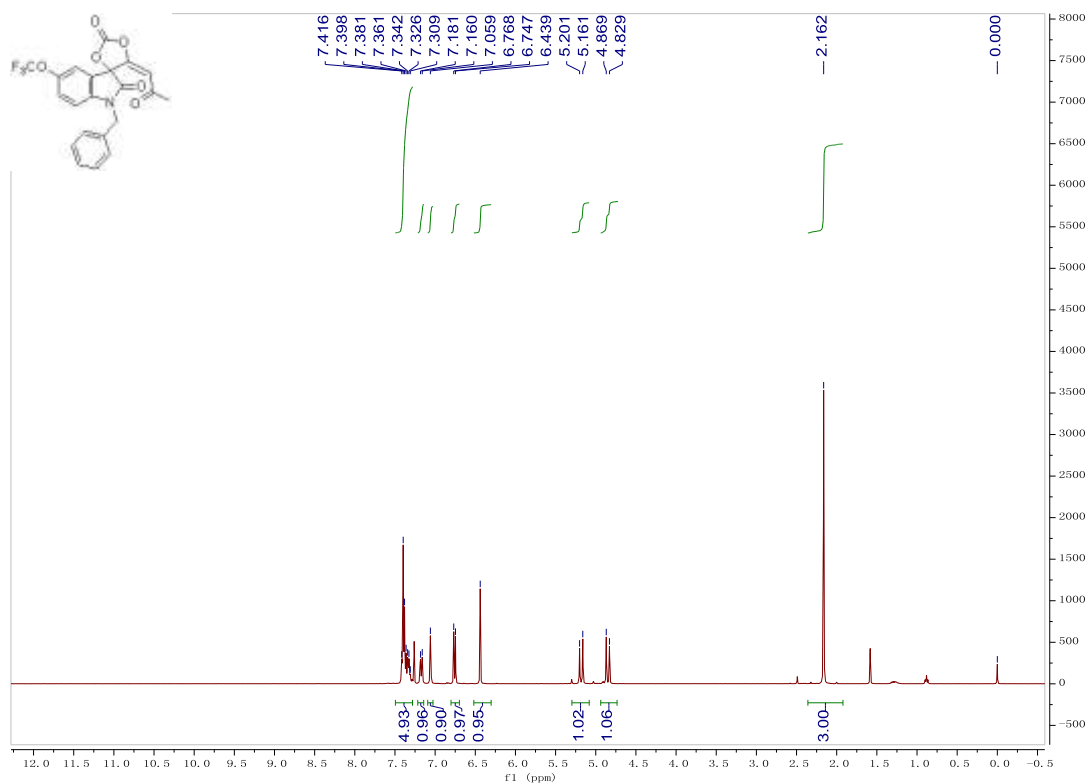

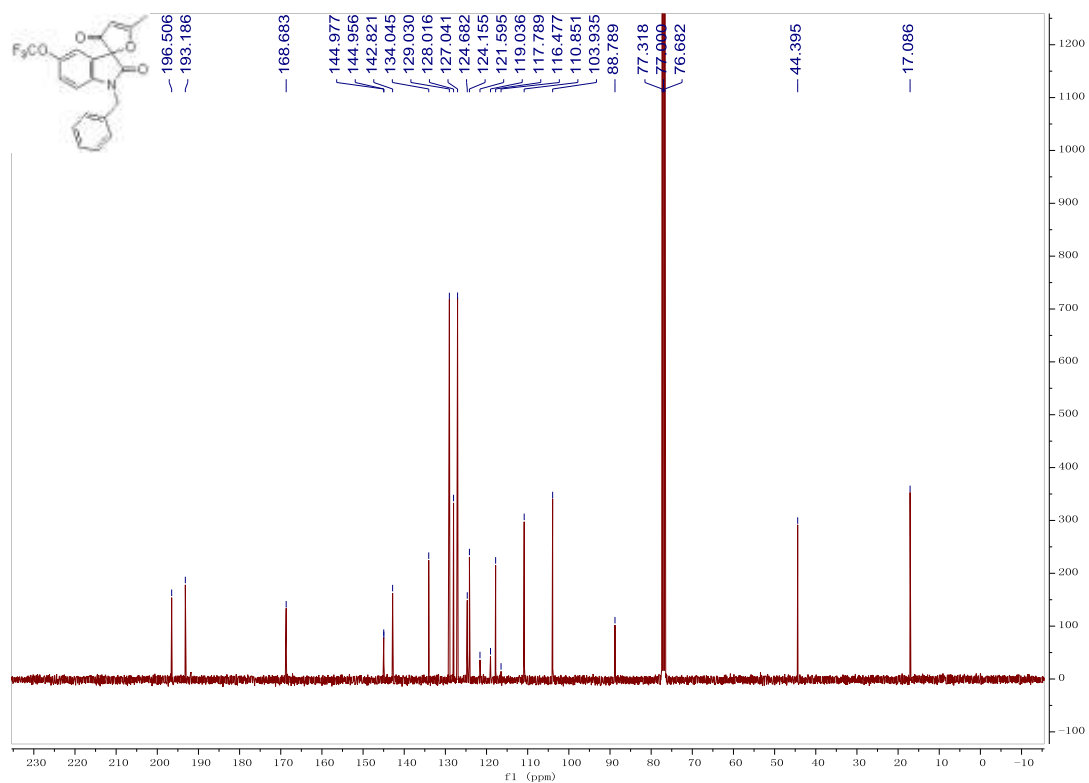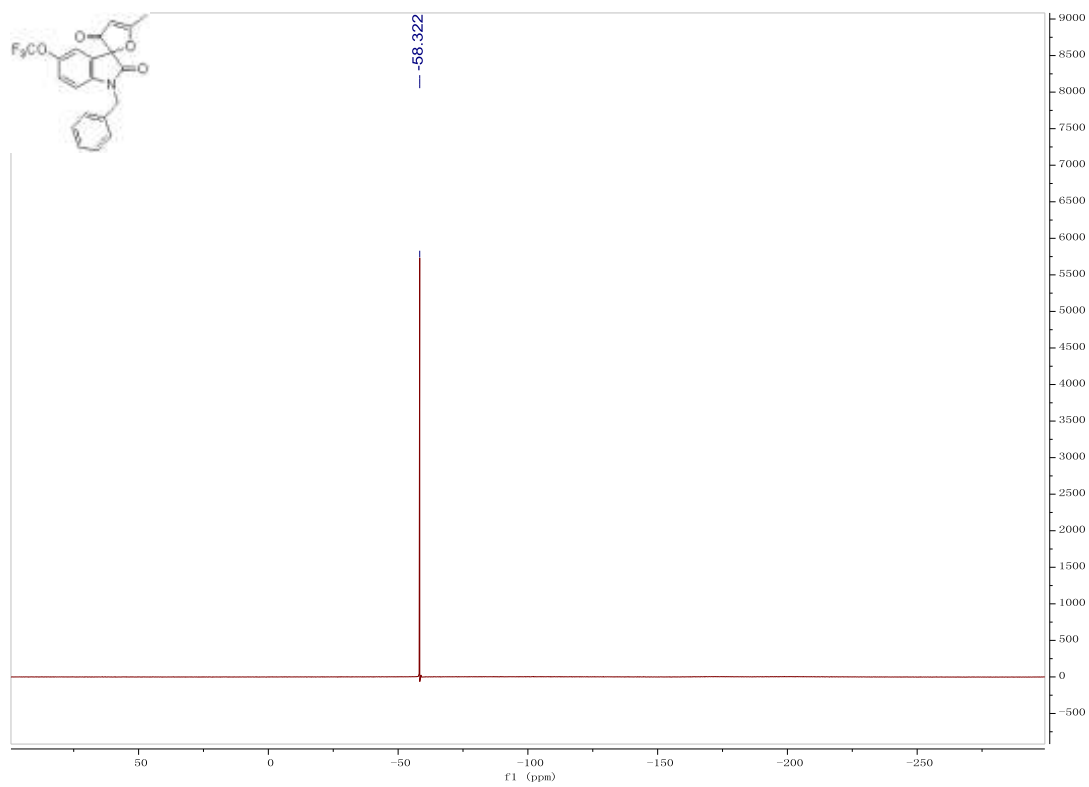

实验时间: 2019-07-20, 11:24:19  
谱图文件: D:\Sun Yaoliang\co2\17-96-c-rac.org

实验者:  
报告时间: 2019-07-20, 12:28:34  
积分方法: 面积归一法

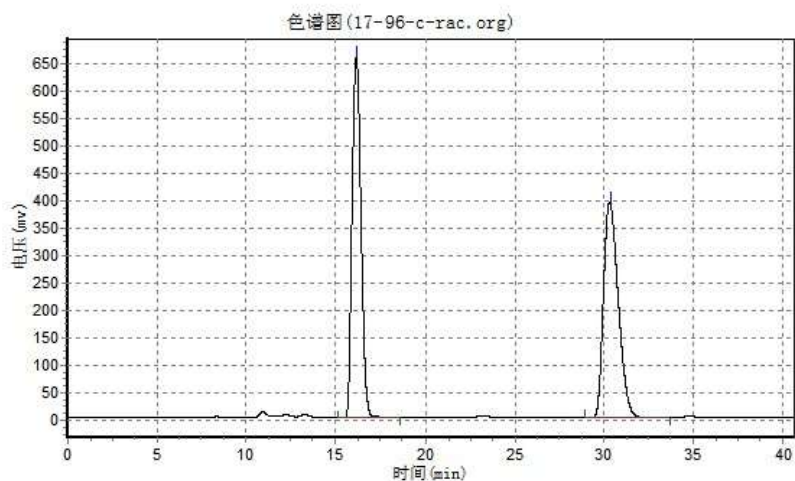

分析结果表

| 峰号 | 峰名 | 保留时间   | 峰高          | 峰面积          | 含量       |
|----|----|--------|-------------|--------------|----------|
| 1  |    | 16.198 | 657854.000  | 23132344.000 | 50.3385  |
| 2  |    | 30.365 | 394007.219  | 22821224.000 | 49.6615  |
| 总计 |    |        | 1051861.219 | 45953568.000 | 100.0000 |

实验时间: 2019-07-20, 12:25:49  
谱图文件: D:\Sun Yaoliang\co2\17-96-c-asy.org

实验者:  
报告时间: 2019-07-20, 12:26:32  
积分方法: 面积归一法

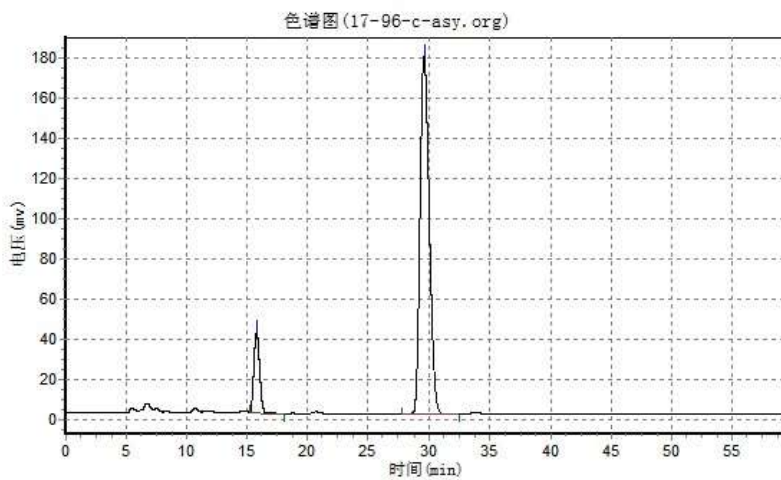

分析结果表

| 峰号 | 峰名 | 保留时间   | 峰高         | 峰面积          | 含量       |
|----|----|--------|------------|--------------|----------|
| 1  |    | 16.790 | 40333.766  | 1340497.750  | 12.4361  |
| 2  |    | 29.557 | 178145.266 | 9438625.000  | 87.5639  |
| 总计 |    |        | 218479.031 | 10779122.750 | 100.0000 |

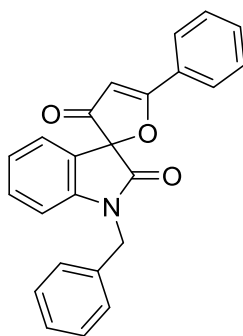

**1'-benzyl-5-phenyl-3H-spiro[furan-2,3'-indoline]-2',3-dione (3w)**

A white solid, 88% yield (65 mg). M.p.: 141-143 °C.  $^1\text{H}$  NMR ( $\text{CDCl}_3$ , TMS, 400 MHz)  $\delta$  4.88 (d,  $J = 16.0$  Hz, 1H,  $\text{CH}_2$ ), 5.05 (d,  $J = 16.0$  Hz, 1H,  $\text{CH}_2$ ), 6.24 (s, 1H, =CH), 6.77 (d,  $J = 8.0$  Hz, 1H, ArH), 7.05 (t,  $J = 7.6$  Hz, 1H, ArH), 7.18 (d,  $J = 7.2$  Hz, 1H, ArH), 7.28-7.40 (m, 6H, ArH), 7.51-7.56 (m, 2H, ArH), 7.62 (t,  $J = 7.6$  Hz, 1H, ArH), 7.94 (d,  $J = 7.2$  Hz, 1H, ArH).  $^{13}\text{C}$  NMR ( $\text{CDCl}_3$ , TMS, 100 MHz)  $\delta$  44.3, 89.3, 100.4, 110.3, 123.5, 123.8, 124.0, 127.1, 127.6, 127.8, 128.1, 128.9, 129.0, 131.1, 133.4, 134.7, 144.3, 169.1, 187.9, 196.9. IR (EtOH)  $\nu$  3064, 2923, 2852, 1857, 1735, 1522, 1484, 1381, 1165, 1029, 959  $\text{cm}^{-1}$ . HRMS (ESI) Calcd. For  $\text{C}_{24}\text{H}_{21}\text{N}_2\text{O}_3^{+1}(\text{M}+\text{NH}_4)^+$  requires 385.1547, Found: 385.1544.

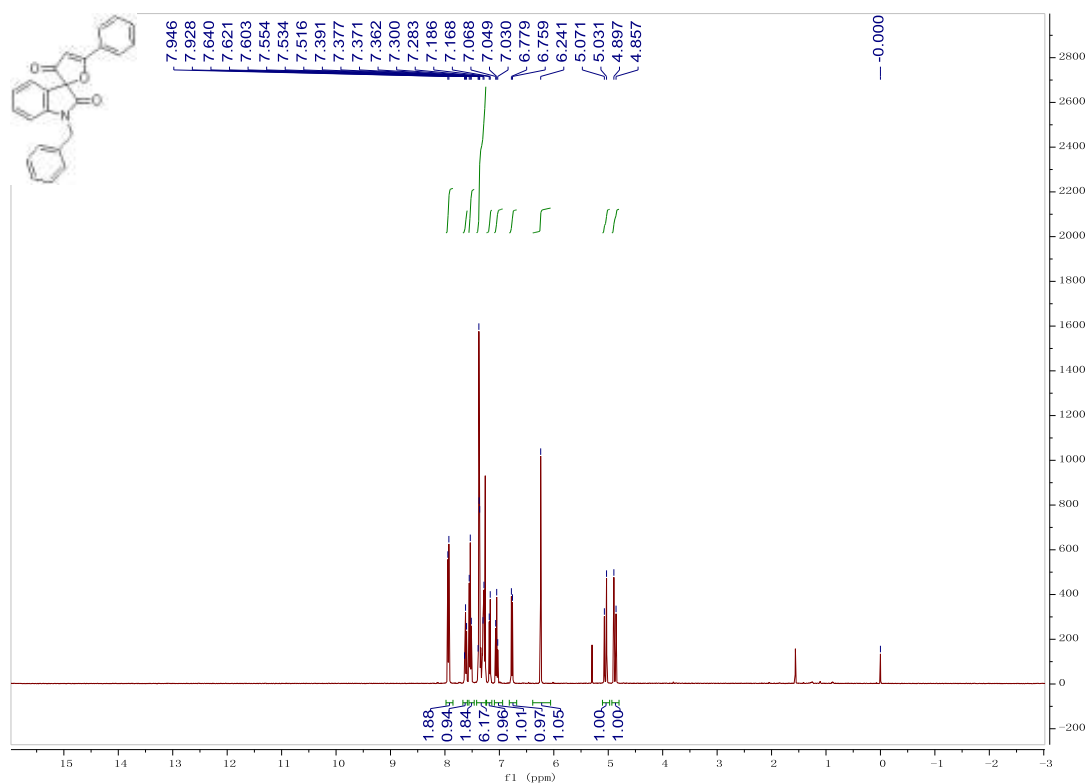

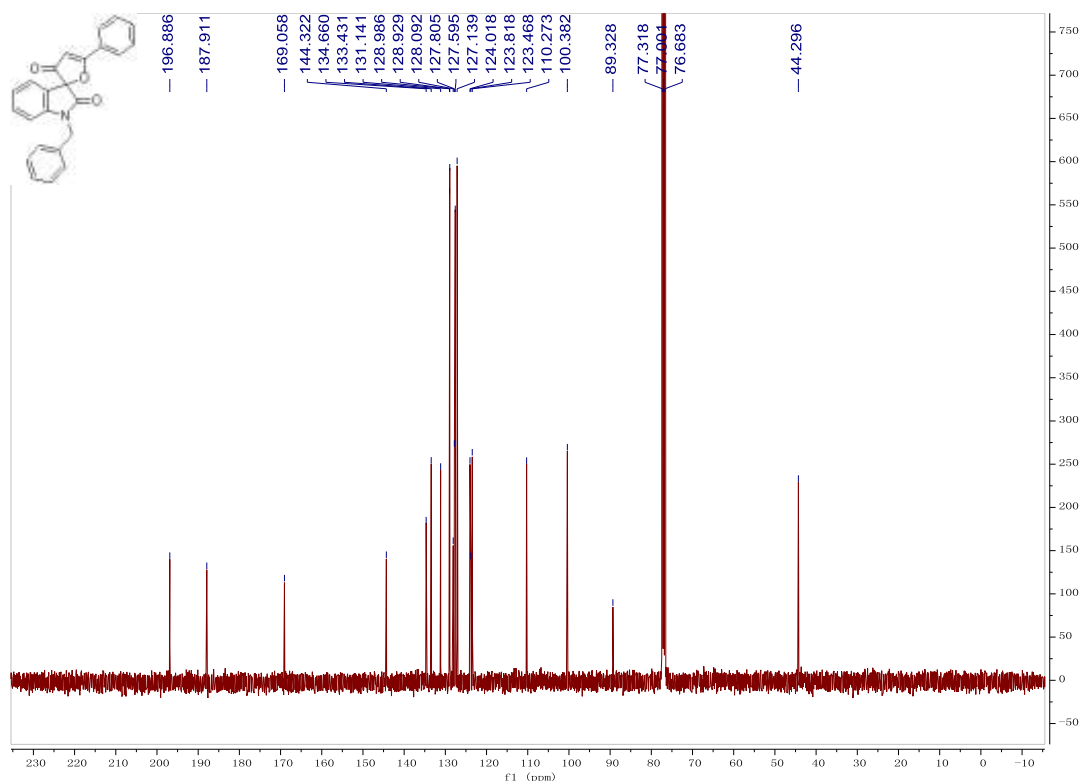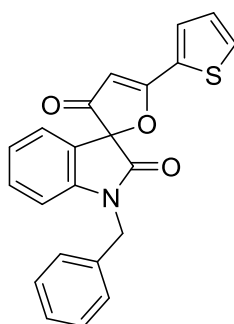

**1'-benzyl-5-(thiophen-2-yl)-3H-spiro[furan-2,3'-indoline]-2',3-dione (3x)**

A white solid, 73% yield (54 mg). M.p.: 162-164 °C.  $^1\text{H}$  NMR ( $\text{CDCl}_3$ , TMS, 400 MHz)  $\delta$  4.86 (d,  $J$  = 15.6 Hz, 1H,  $\text{CH}_2$ ), 5.05 (d,  $J$  = 15.6 Hz, 1H,  $\text{CH}_2$ ), 6.07 (s, 1H, =CH), 6.76 (d,  $J$  = 8.0 Hz, 1H, ArH), 7.05 (t,  $J$  = 7.6 Hz, 1H, ArH), 7.19 (d,  $J$  = 6.8 Hz, 1H, ArH), 7.23-7.31 (m, 4H, ArH), 7.33-7.38 (m, 3H, ArH), 7.74 (dd,  $J$  = 0.8, 4.8 Hz, 1H, ArH), 7.82 (dd,  $J$  = 0.8, 3.6 Hz, 1H, ArH).  $^{13}\text{C}$  NMR ( $\text{CDCl}_3$ , TMS, 100 MHz)  $\delta$  44.3, 89.3, 99.2, 110.3, 123.5, 123.7, 124.1, 127.1, 127.8, 128.7, 128.9, 130.9, 131.2, 131.8, 133.1, 134.6, 144.3, 169.1, 181.9, 195.9. IR (EtOH)  $\nu$  2922, 2852, 1732, 1699, 1581, 1466, 1414, 1114, 1022, 972, 835, 750  $\text{cm}^{-1}$ . HRMS (ESI) Calcd. For  $\text{C}_{22}\text{H}_{16}\text{NO}_3\text{S}^{+1}(\text{M}+\text{H})^{+}$  requires 374.0845, Found: 374.0841.

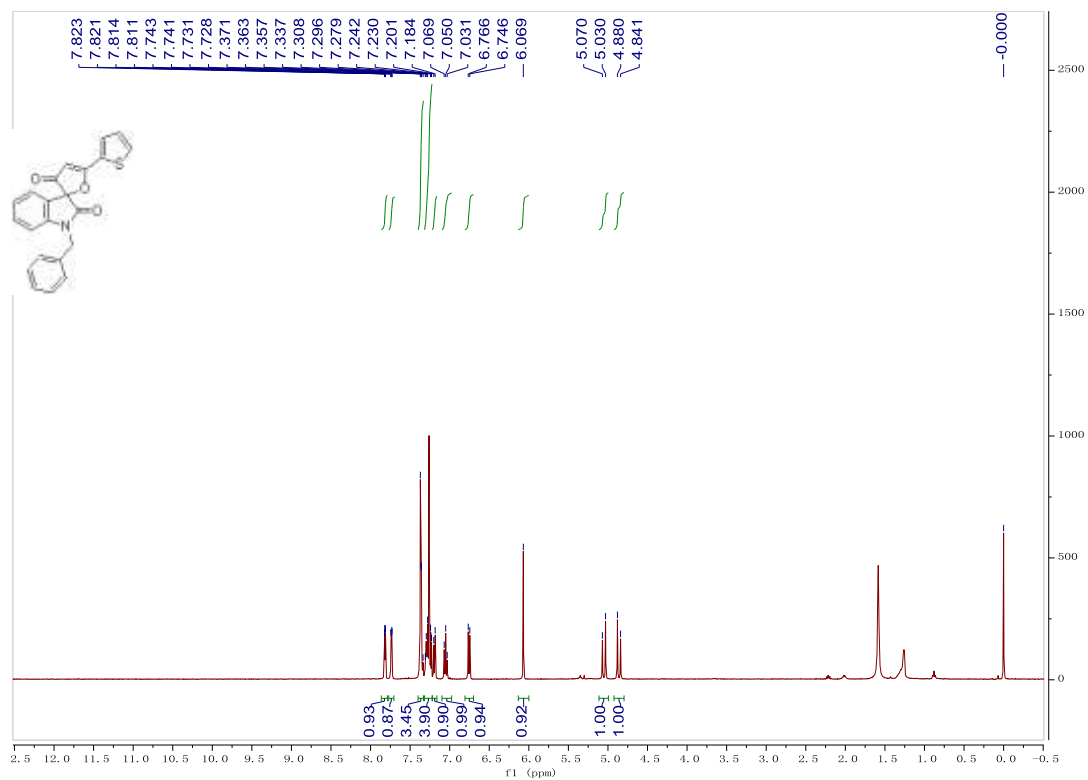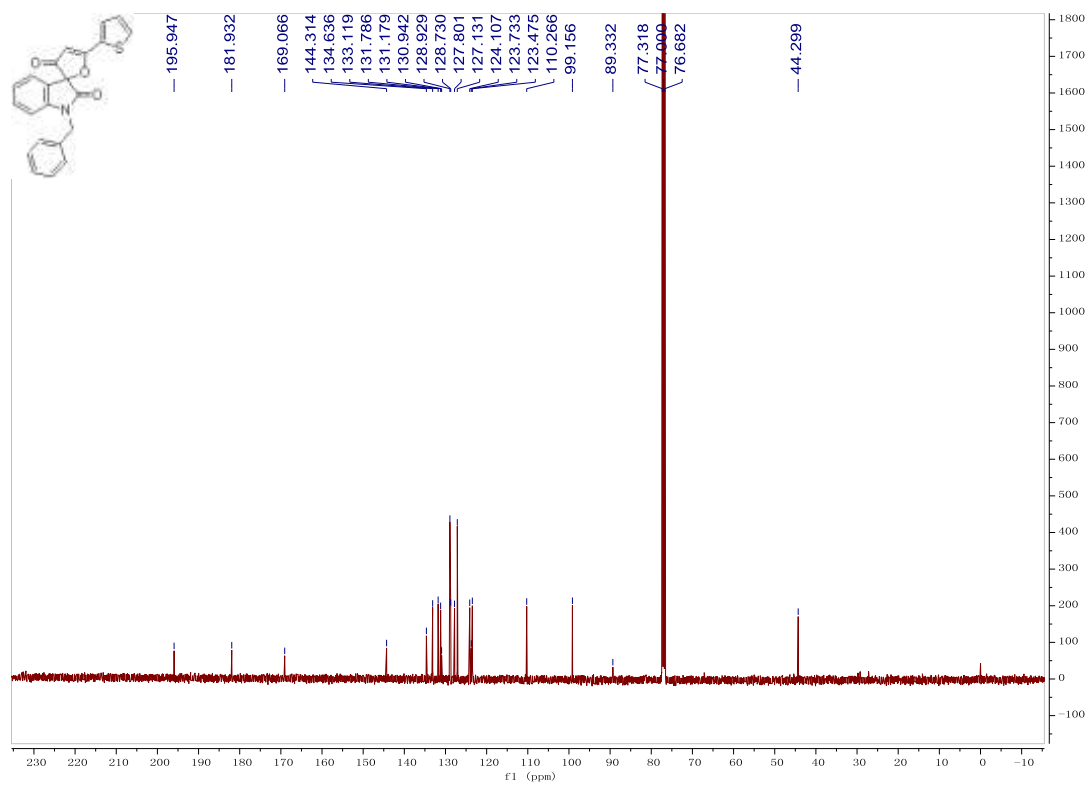

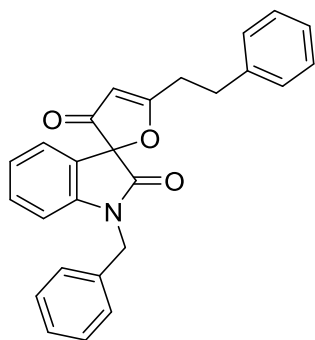

**1'-benzyl-5-phenethyl-3H-spiro[furan-2,3'-indoline]-2',3-dione (3y)**

A white solid, 91% yield (72 mg). M.p.: 137-139 °C.  $^1\text{H}$  NMR ( $\text{CDCl}_3$ , TMS, 400 MHz)  $\delta$  2.99-3.13 (m, 4H,  $\text{CH}_2$ ), 4.84 (d,  $J = 15.6$  Hz, 1H,  $\text{CH}_2$ ), 4.99 (d,  $J = 15.6$  Hz, 1H,  $\text{CH}_2$ ), 5.60 (s, 1H, =CH), 6.72 (d,  $J = 8.0$  Hz, 1H, ArH), 6.96 (d,  $J = 7.6$  Hz, 1H, ArH), 7.01 (t,  $J = 7.6$  Hz, 1H, ArH), 7.22-7.28 (m, 5H, ArH), 7.31-7.36 (m, 6H, ArH).  $^{13}\text{C}$  NMR ( $\text{CDCl}_3$ , TMS, 100 MHz)  $\delta$  32.0, 32.5, 44.2, 89.0, 103.7, 110.2, 123.36, 123.42, 123.8, 126.7, 127.0, 127.8, 128.4, 128.7, 128.9, 131.0, 134.6, 139.3, 144.2, 168.8, 195.2, 197.4. IR (EtOH)  $\nu$  2958, 2916, 2845, 1733, 1599, 1487, 1466, 1360, 1170, 748  $\text{cm}^{-1}$ . HRMS (ESI) Calcd. For  $\text{C}_{26}\text{H}_{25}\text{N}_2\text{O}_3^+ (\text{M}+\text{NH}_4)^+$  requires 413.1860, Found: 413.1853.

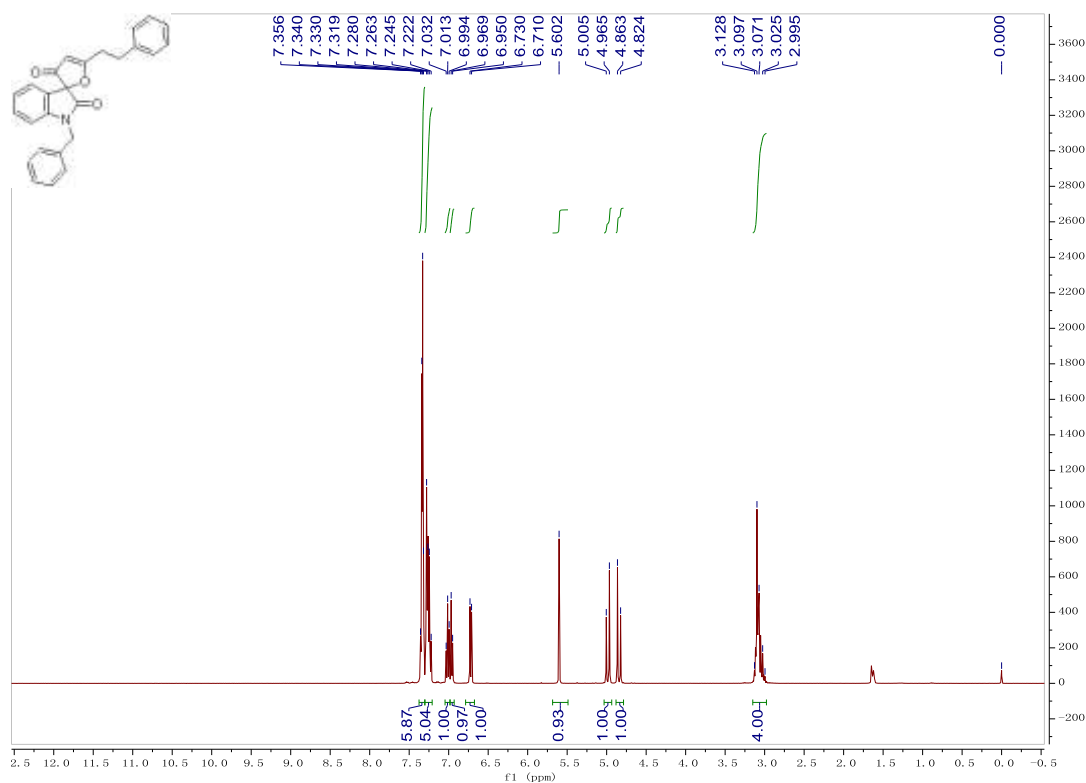



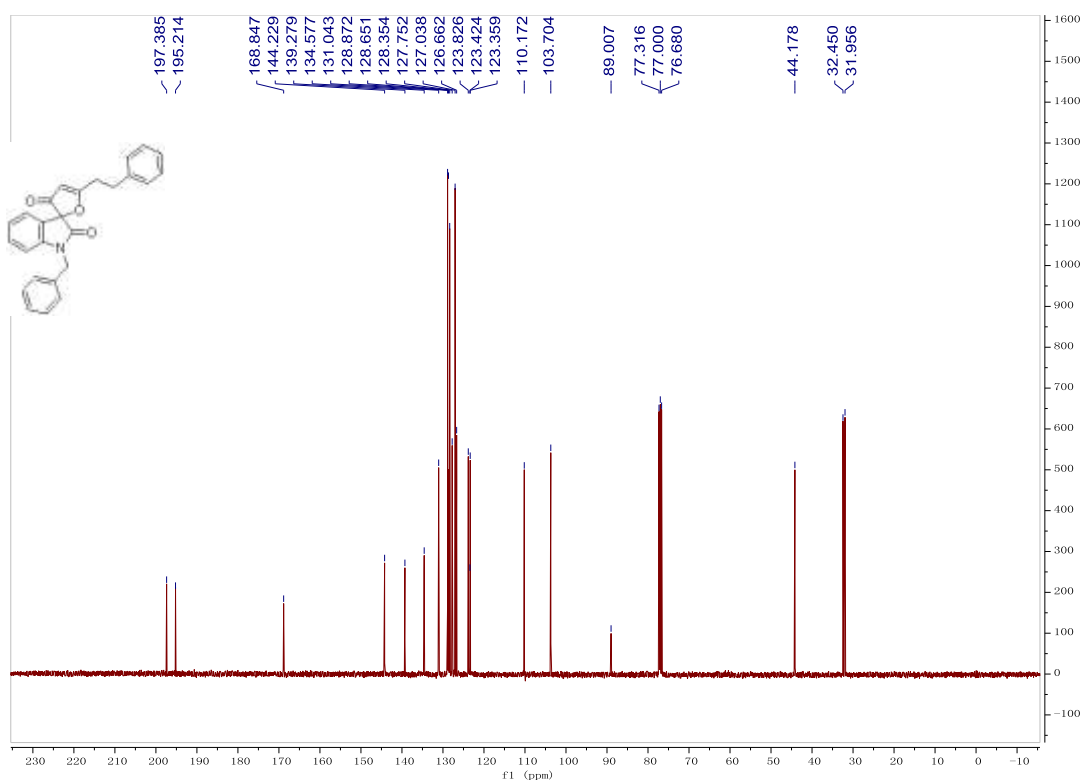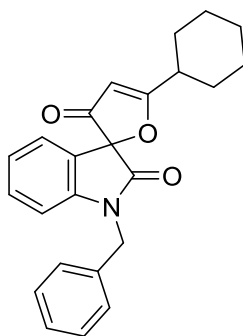

### 1'-benzyl-5-cyclohexyl-3H-spiro[furan-2,3'-indoline]-2',3-dione (3z)

A white solid, 59% yield (66 mg). M.p.: 152-154 °C.  $^1\text{H}$  NMR ( $\text{CDCl}_3$ , TMS, 400 MHz)  $\delta$  1.25-1.58 (m, 4H,  $\text{CH}_2$ ), 1.73-1.77 (m, 1H,  $\text{CH}_2$ ), 1.84-1.90 (m, 2H,  $\text{CH}_2$ ), 2.11-2.15 (m, 2H,  $\text{CH}_2$ ), 2.65-2.73 (m, 1H, CH), 4.84 (d,  $J = 16.0$  Hz, 1H,  $\text{CH}_2$ ), 5.00 (d,  $J = 16.0$  Hz, 1H,  $\text{CH}_2$ ), 5.60 (s, 1H, =CH), 6.72 (d,  $J = 8.0$  Hz, 1H, ArH), 7.03 (dt,  $J = 0.8, 7.6$  Hz, 1H, ArH), 7.09 (dd,  $J = 1.2, 7.6$  Hz, 1H, ArH), 7.22-7.36 (m, 6H, ArH).  $^{13}\text{C}$  NMR ( $\text{CDCl}_3$ , TMS, 100 MHz)  $\delta$  25.4, 25.5, 25.7, 29.8, 29.9, 39.8, 44.2, 88.7, 101.4, 110.2, 123.4, 123.6, 123.7, 127.1, 127.8, 128.9, 131.0, 134.7, 144.3, 169.0, 197.6, 200.5. IR (EtOH)  $\nu$  2925, 2853, 1734, 1704, 1590, 1487, 1340, 1278, 1118, 747  $\text{cm}^{-1}$ . HRMS (ESI) Calcd. For  $\text{C}_{24}\text{H}_{27}\text{N}_2\text{O}_3$   $^+(M+\text{NH}_4)^+$  requires 391.2016, Found: 391.2006.

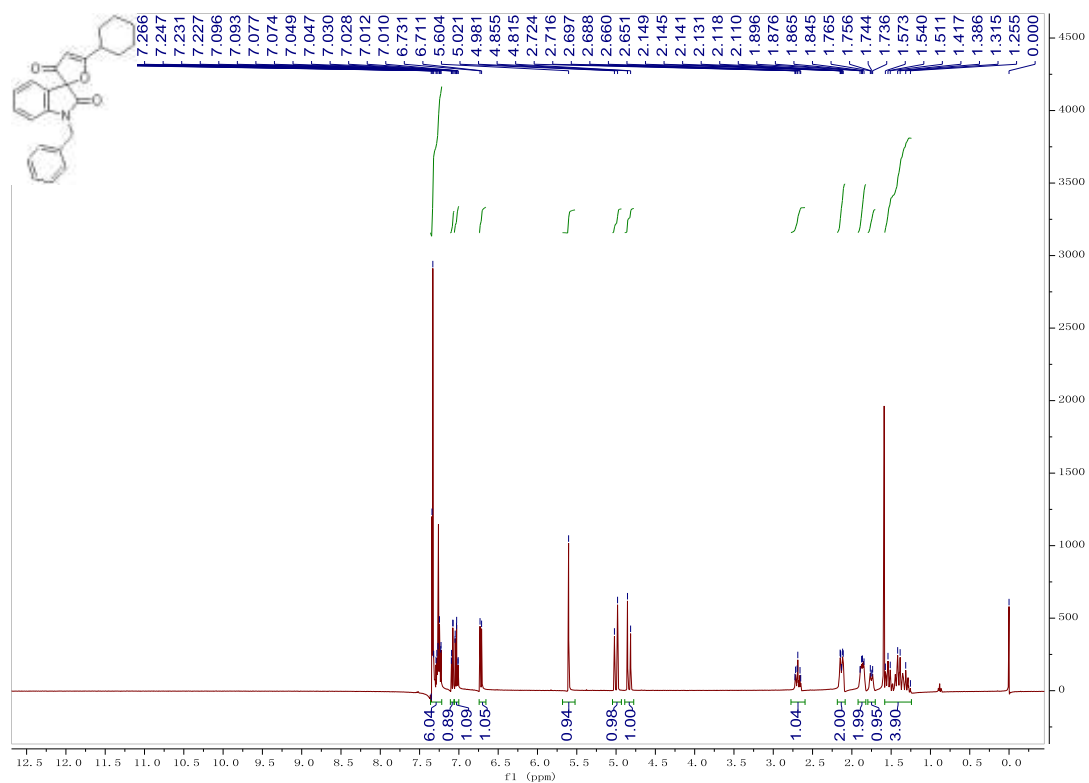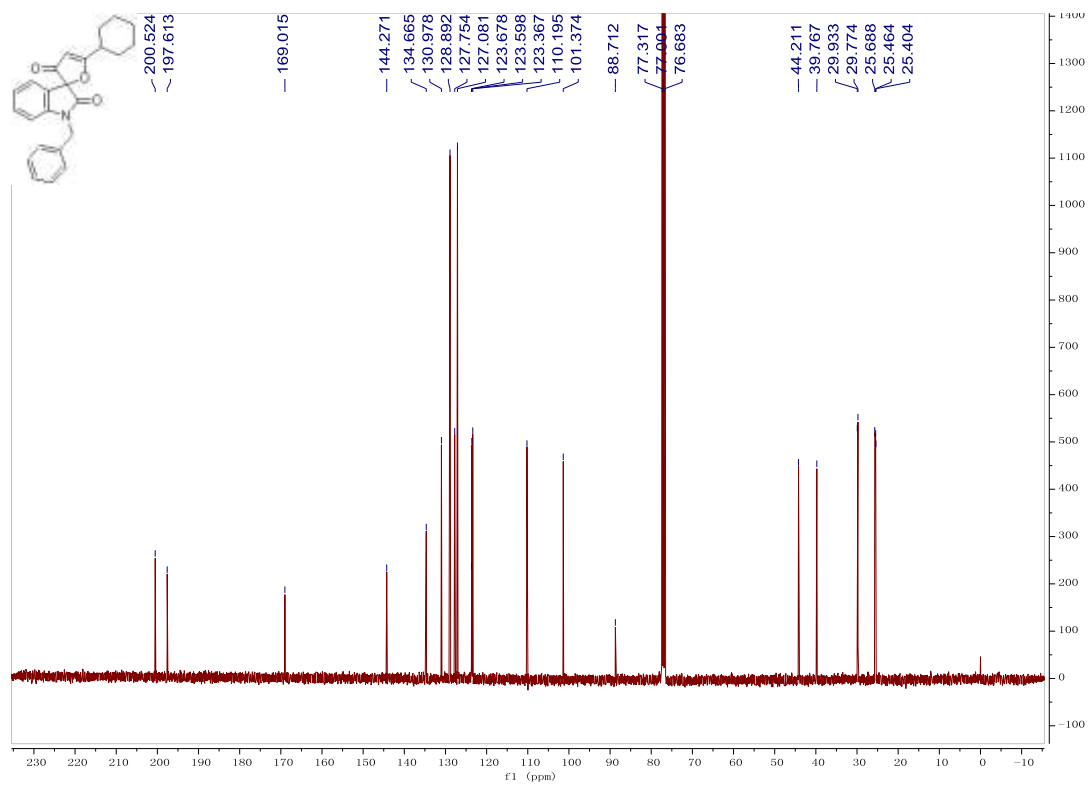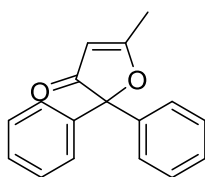

### 5-methyl-2,2-diphenylfuran-3(2H)-one (3ab)

A white solid, 69% yield (52 mg). M.p.: 97-99 °C.  $^1\text{H}$  NMR ( $\text{CDCl}_3$ , TMS, 400 MHz)  $\delta$  2.38 (s, 3H,  $\text{CH}_3$ ), 5.50 (s, 1H, =CH), 7.29-7.37 (m, 6H, ArH), 7.45 (d,  $J = 7.6$  Hz, 4H, ArH).  $^{13}\text{C}$  NMR ( $\text{CDCl}_3$ , TMS, 100 MHz)  $\delta$  17.0, 93.0, 103.3, 126.6, 128.3, 128.4, 138.2, 188.9, 202.6. IR (EtOH)  $\nu$  3063, 3031, 2929, 2853, 1702, 1613, 1448, 1333, 1170, 944  $\text{cm}^{-1}$ . HRMS (ESI) Calcd. For  $\text{C}_{17}\text{H}_{15}\text{O}_2^+ (\text{M}+\text{H})^+$  requires 251.1067, Found: 251.1062.

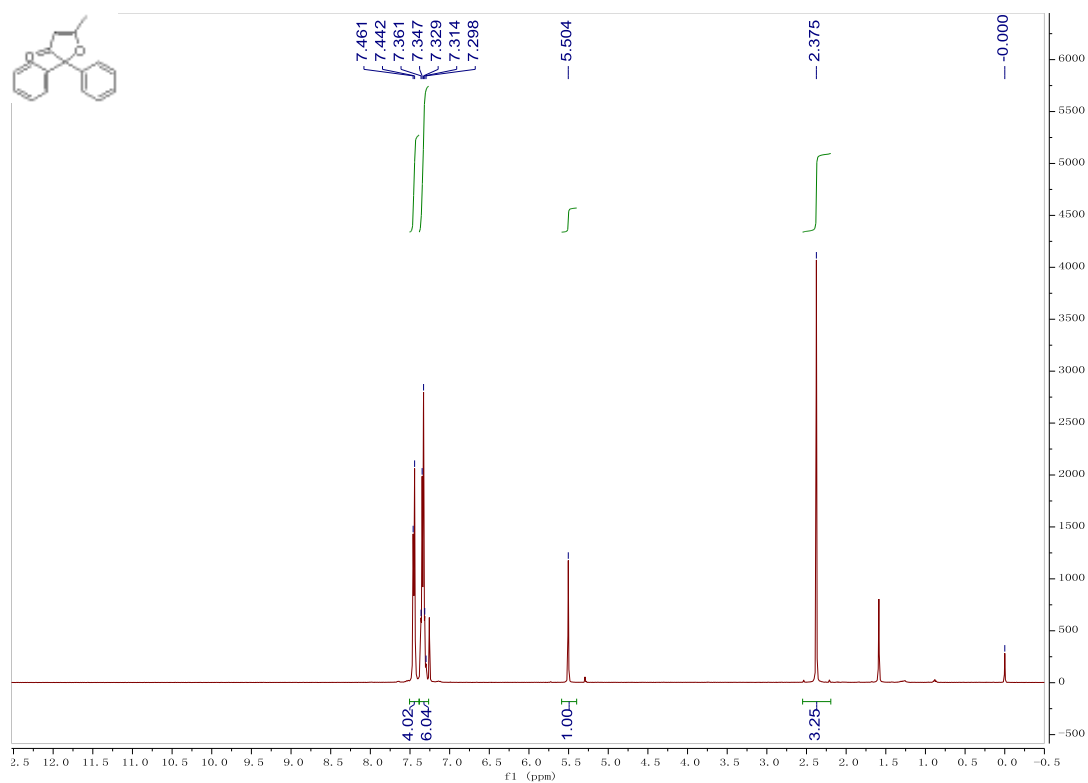

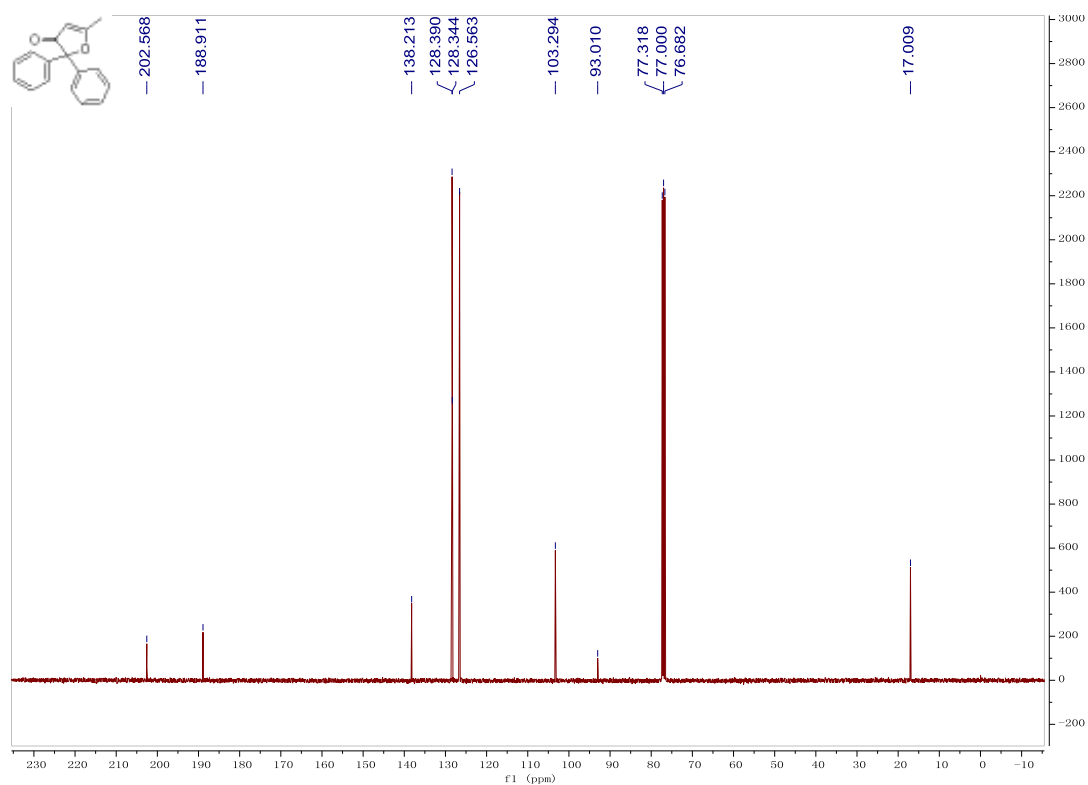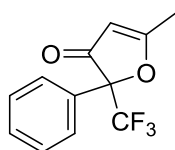

### 5-methyl-2-phenyl-2-(trifluoromethyl)furan-3(2H)-one (3ac)

A liquid, 46% yield (33 mg).  $^1\text{H}$  NMR ( $\text{CDCl}_3$ , TMS, 400 MHz)  $\delta$  2.41 (s, 3H,  $\text{CH}_3$ ), 5.55 (s, 1H, =CH), 7.41-7.44 (m, 3H, ArH), 7.79-7.82 (m, 2H, ArH).  $^{13}\text{C}$  NMR ( $\text{CDCl}_3$ , TMS, 100 MHz)  $\delta$  16.8, 85.8 (q,  $J = 30.2$  Hz), 104.4, 121.3 (q,  $J = 282.3$  Hz), 126.2, 128.5, 129.3, 129.9, 190.2, 195.6.  $^{19}\text{F}$  NMR (376 MHz,  $\text{CDCl}_3$ ,  $\text{CFCl}_3$ )  $\delta$  -76.93. IR (EtOH)  $\nu$  3086, 3060, 2913, 2843, 1605, 1471, 1353, 1228, 1089, 749  $\text{cm}^{-1}$ . HRMS (DART Positive Ion Mode) Calcd. For  $\text{C}_{12}\text{H}_{10}\text{O}_2\text{F}_3^{+1}(\text{M}+\text{H})^+$  requires 243.0627, Found: 243.0627.

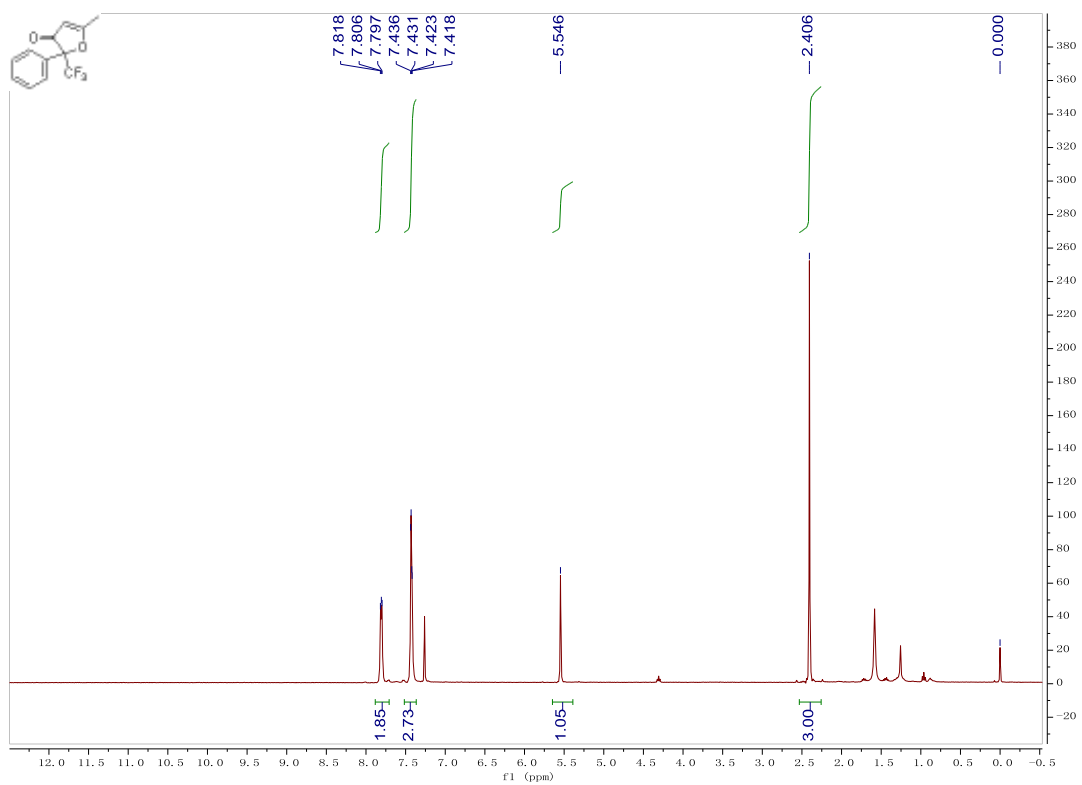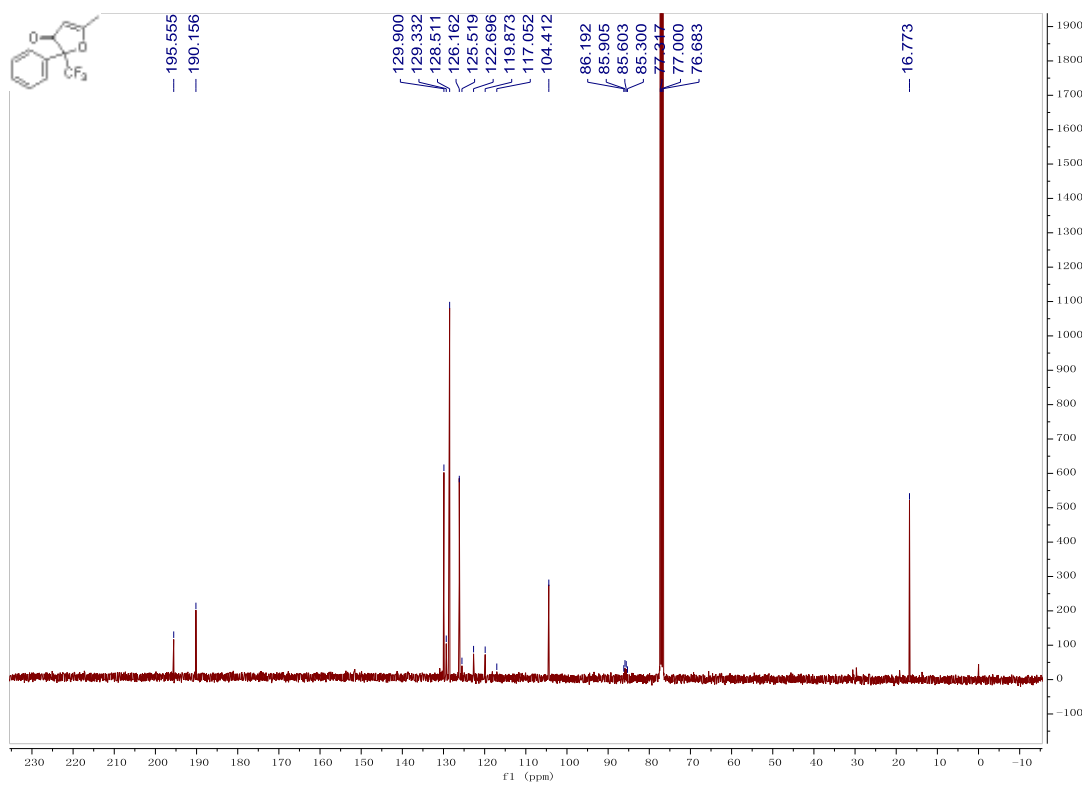

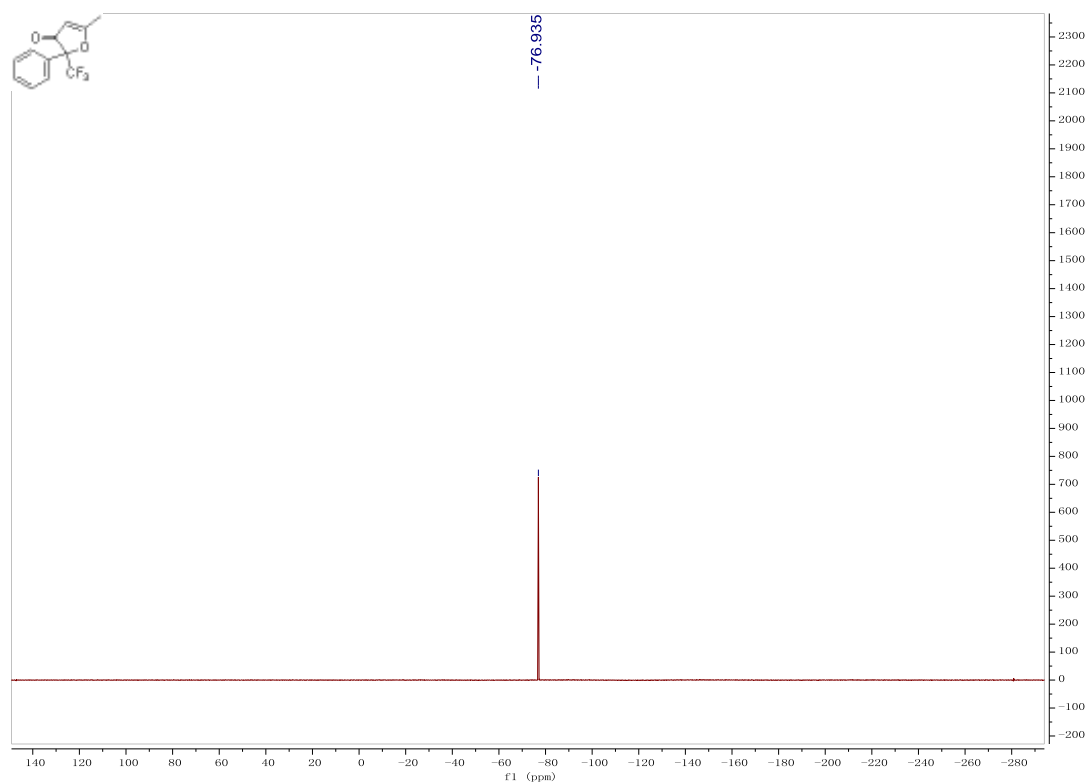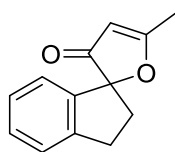

**5-methyl-2',3'-dihydro-3H-spiro[furan-2,1'-inden]-3-one (3ad)**

A white solid, 79% yield (32 mg). M.p.: 84-86 °C.  $^1\text{H}$  NMR ( $\text{CDCl}_3$ , TMS, 400 MHz)  $\delta$  2.29 (s, 3H,  $\text{CH}_3$ ), 2.33-2.40 (m, 1H,  $\text{CH}_2$ ), 2.57-2.66 (m, 1H,  $\text{CH}_2$ ), 3.09-3.27 (m, 2H,  $\text{CH}_2$ ), 5.55 (s, 1H, =CH), 7.06 (d,  $J = 7.6$  Hz, 1H, ArH), 7.19-7.24 (m, 1H, ArH), 7.31-7.33 (m, 2H, ArH).  $^{13}\text{C}$  NMR ( $\text{CDCl}_3$ , TMS, 100 MHz)  $\delta$  17.2, 29.7, 30.6, 35.5, 99.1, 103.3, 123.2, 125.1, 127.2, 129.9, 139.5, 145.7, 189.6, 205.1. IR (EtOH)  $\nu$  3076, 2976, 2929, 1674, 1479, 1456, 1358, 1219, 1076, 764  $\text{cm}^{-1}$ . HRMS (ESI) Calcd. For  $\text{C}_{13}\text{H}_{16}\text{NO}_2^{+1}(\text{M}+\text{NH}_4)^+$  requires 218.1176, Found: 218.1175.

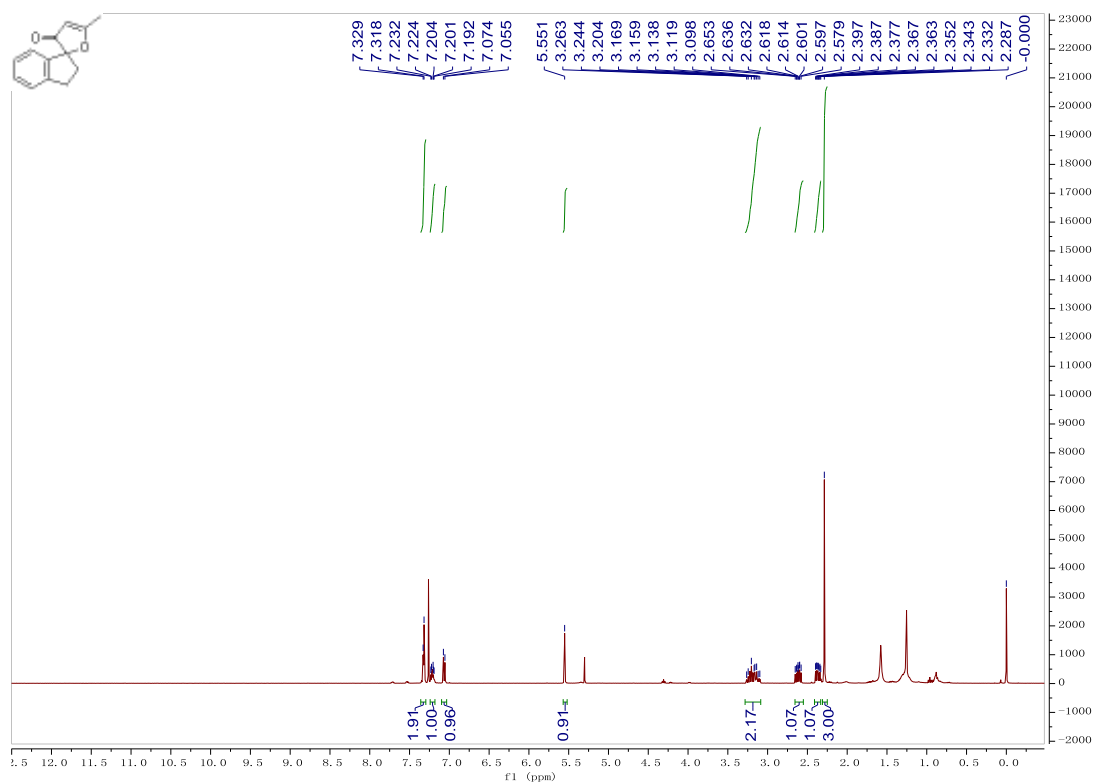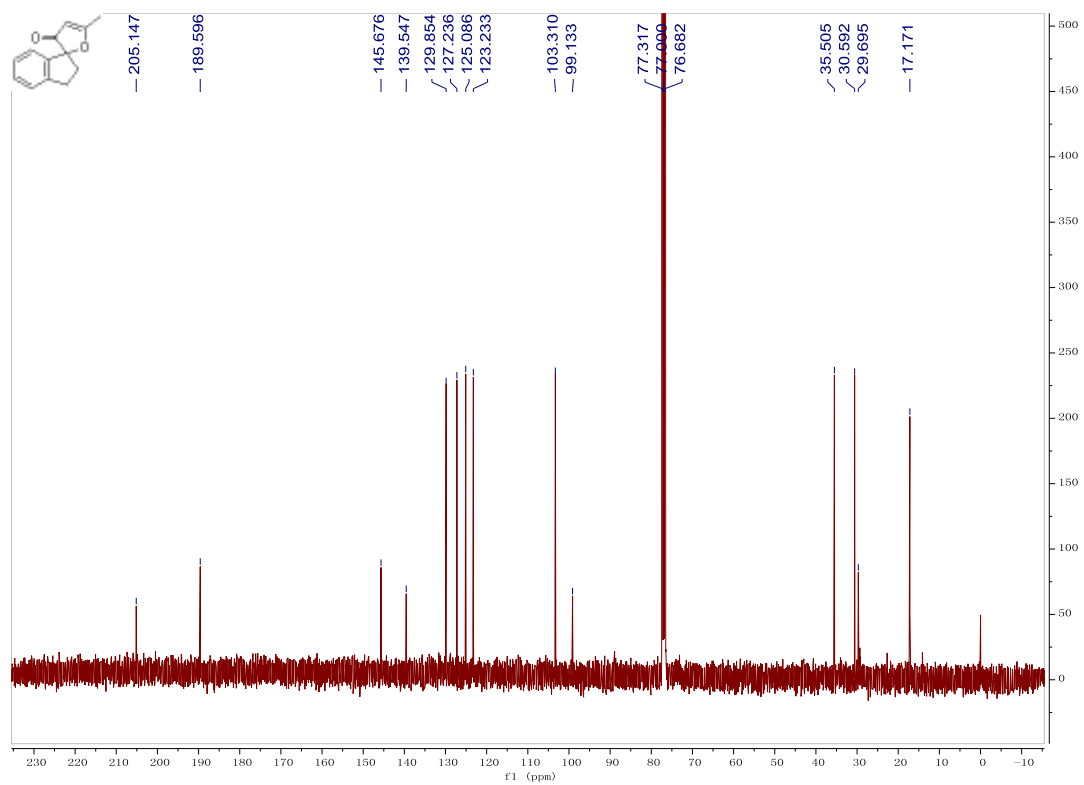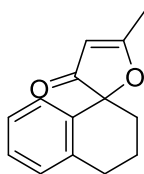

### 5-methyl-3',4'-dihydro-2'H,3H-spiro[furan-2,1'-naphthalen]-3-one (3ae)

A white solid, 75% yield (32 mg). M.p.: 79-81 °C.  $^1\text{H}$  NMR ( $\text{CDCl}_3$ , TMS, 400 MHz)  $\delta$  1.91-2.03 (m, 2H,  $\text{CH}_2$ ), 2.08-2.16 (m, 2H,  $\text{CH}_2$ ), 2.28 (s, 3H,  $\text{CH}_3$ ), 2.86-2.90 (m, 2H,  $\text{CH}_2$ ), 5.56 (s, 1H, =CH), 6.98 (d,  $J = 8.0$  Hz, 1H, ArH), 7.12-7.16 (m, 2H, ArH), 7.22-7.26 (m, 1H, ArH).  $^{13}\text{C}$  NMR ( $\text{CDCl}_3$ , TMS, 100 MHz)  $\delta$  17.1, 19.0, 29.0, 32.6, 89.8, 103.4, 126.7, 126.8, 129.0, 129.4, 132.1, 138.6, 189.7, 206.7. IR (EtOH)  $\nu$  3023, 2937, 2877, 1696, 1596, 1492, 1384, 1162, 1100, 949, 762  $\text{cm}^{-1}$ . HRMS (ESI) Calcd. For  $\text{C}_{14}\text{H}_{15}\text{O}_2^{+1}(\text{M}+\text{H})^+$  requires 215.1067, Found: 215.1066.

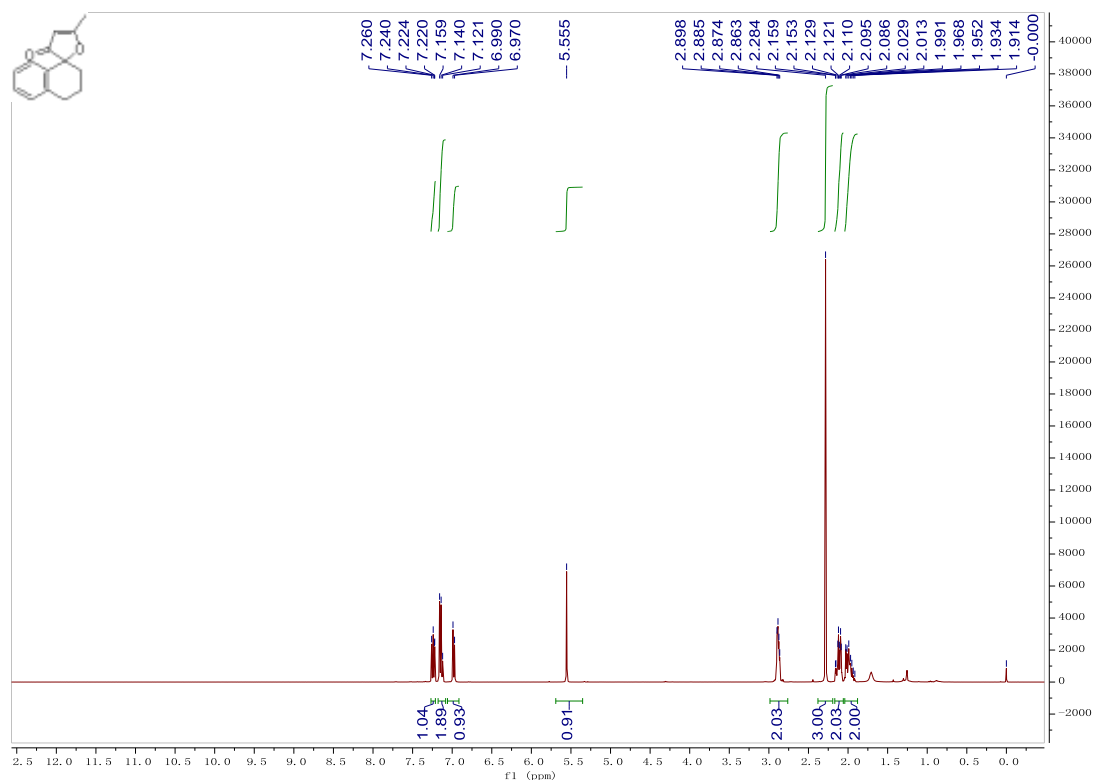



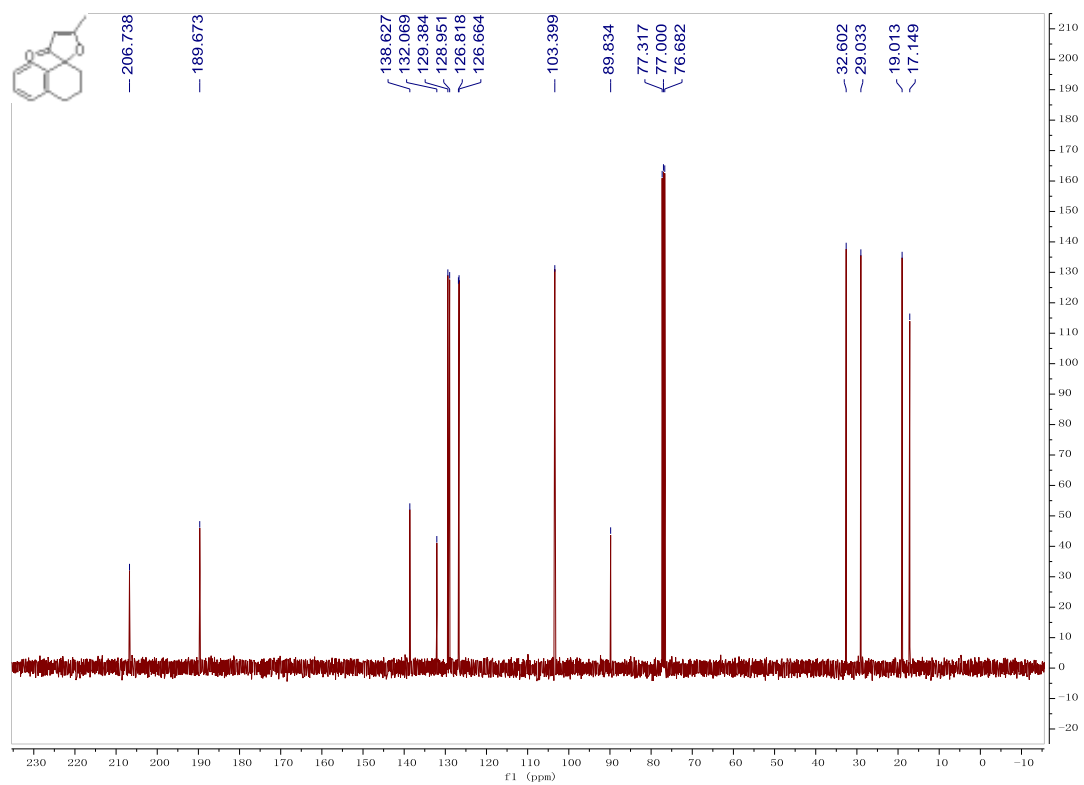

## 5. General Procedure for synthesis of N-CP 1-6 and Spectroscopic Data of N-CP 1-6

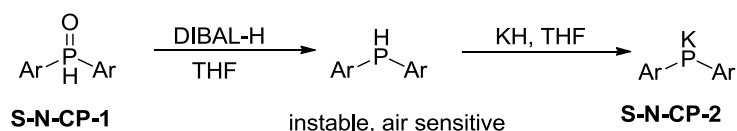

Secondary phosphines were prepared according to the literature of Busacca's group.<sup>3 4</sup> The crude secondary phosphines were used to prepared  $\text{KAr}_2$  **S-N-CP-2** directly, which was based on Pfaltz's report.<sup>5</sup>

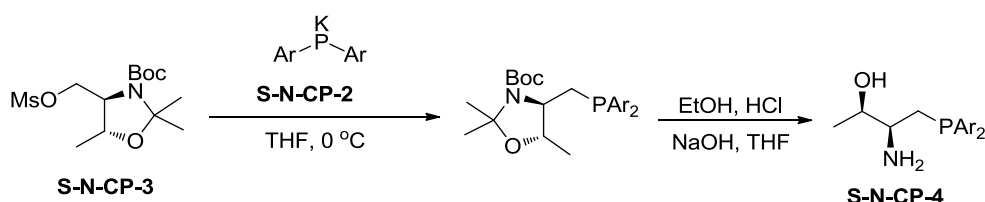

(4*S*,5*R*)-tert-Butyl(2,2,5-trimethyl-4-((methylsulfonyloxy)methyl)oxazolidine-3-carboxylate

**S-N-CP-3** was known compound and prepared under Lu's conditions.<sup>6</sup>

To a solution of **S-N-CP-3** (1.2 mmol, 1.2 equiv) in dry THF (10 mL) was added  $\text{KAr}_2$  **S-N-CP-2** solution (1.0 mmol, 1.0 equiv) under  $-0^\circ\text{C}$ . After stirring for 10 minutes, the resulting reaction mixture was warm up to room temperature and stirred over night. After that, ethanol (1.0 mL) was added to quench the reaction. The reaction was extracted with ethyl acetate three times and washed by water. Then the reaction mixture was concentrated under high vacuum give the crude products **S-N-CP-4**, which was very sensitive to the oxygen and unable to purify.

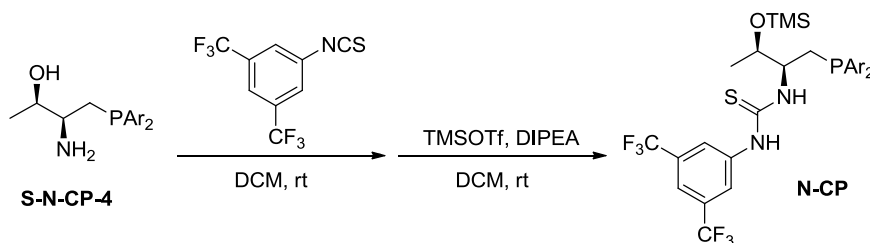

To a solution of crude **S-N-CP-4** (1.0 mol) in  $\text{CH}_2\text{Cl}_2$  (2 mL) under argon atmosphere was added isothiocyanate (1.0 mol), and the reaction mixture was stirred at room temperature for 4 hours. Then the mixture was concentrated in vacuo and purification with fast short silica gel column

chromatography (PE/EA = 4:1) gave the corresponding crude product. To a solution of the crude product in anhydrous DCM (3 mL) at room temperature under argon atmosphere was DIPEA (0.75 mol), followed by TMSOTf (0.5 mol). The resulting mixture was stirred for 2 hours, and concentrated under vacuum after filtration. Purification with silica gel column chromatography (PE/EA = 10:1) gave the corresponding compound **N-CP**.

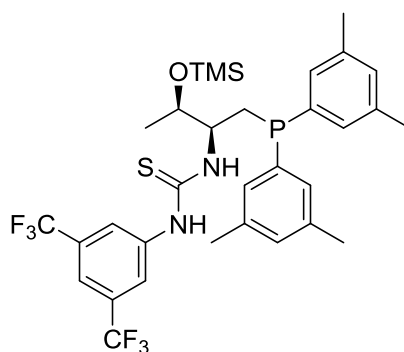

**1-((2S,3R)-1-(bis(3,5-dimethylphenyl)phosphanyl)-3-((trimethylsilyl)oxy)butan-2-yl)-3-(3,5-bis(trifluoromethyl)phenyl)thiourea (N-CP1)**

A white solid, 19% yield (128 mg). M.p.: 72-74 °C.  $^1\text{H}$  NMR ( $\text{CDCl}_3$ , TMS, 400 MHz)  $\delta$  0.08 (s, 9H, 3CH<sub>3</sub>), 1.15 (s, 3H, CH<sub>3</sub>), 2.09 (br, 1H), 2.24 (s, 8H, CH<sub>3</sub>), 2.27 (s, 4H, CH<sub>3</sub>), 2.63 (br, 1H), 4.41 (s, 2H), 6.75 (d,  $J = 5.6$  Hz, 1H), 6.91-7.01 (m, 5H), 7.27 (br, 1H), 7.67 (d,  $J = 7.6$  Hz, 3H, ArH), 8.77 (s, 1H, ArH).  $^{13}\text{C}$  NMR ( $\text{CDCl}_3$ , TMS, 100 MHz)  $\delta$  0.17, 21.18, 21.22, 21.38, 31.1 (d,  $J = 14.6$  Hz), 58.5 (d,  $J = 15.8$  Hz), 68.3 (d,  $J = 11.1$  Hz), 118.9, 122.7 (q,  $J = 269.8$  Hz), 123.2, 130.2, 130.4, 130.5, 130.7, 133.1 (q,  $J = 34.7$  Hz), 136.2, 137.9 (br), 138.6, 179.3.  $^{19}\text{F}$  NMR ( $\text{CDCl}_3$ ,  $\text{CFCl}_3$ , 376 MHz)  $\delta$  -62.97.  $^{31}\text{P}$  NMR ( $\text{CDCl}_3$ , 85%  $\text{H}_3\text{PO}_4$ , 161.93 MHz):  $\delta$  -25.86. IR (EtOH)  $\nu$  3279, 3026, 2927, 2857, 1523, 1284, 1277, 1134, 843, 695  $\text{cm}^{-1}$ . HRMS (ESI) Calcd. For  $\text{C}_{32}\text{H}_{40}\text{F}_6\text{N}_2\text{OPSSi}^{+1}$  ( $\text{M}+\text{H}$ )<sup>+</sup> requires 673.2267, Found: 673.2252.

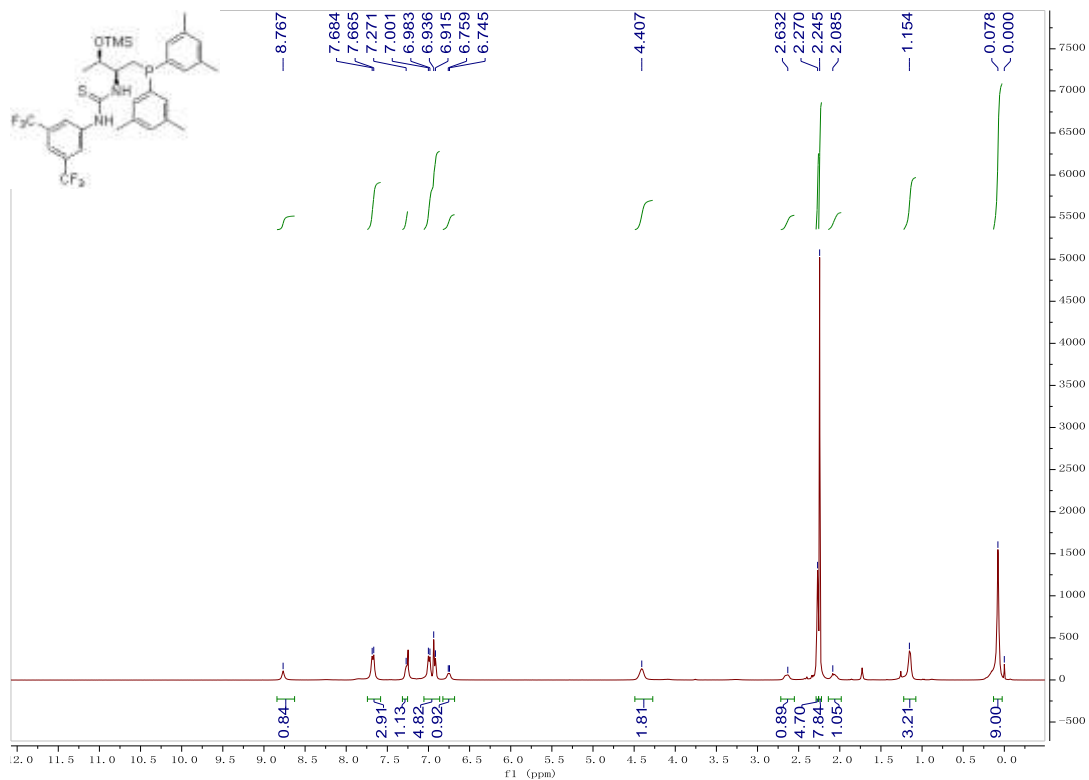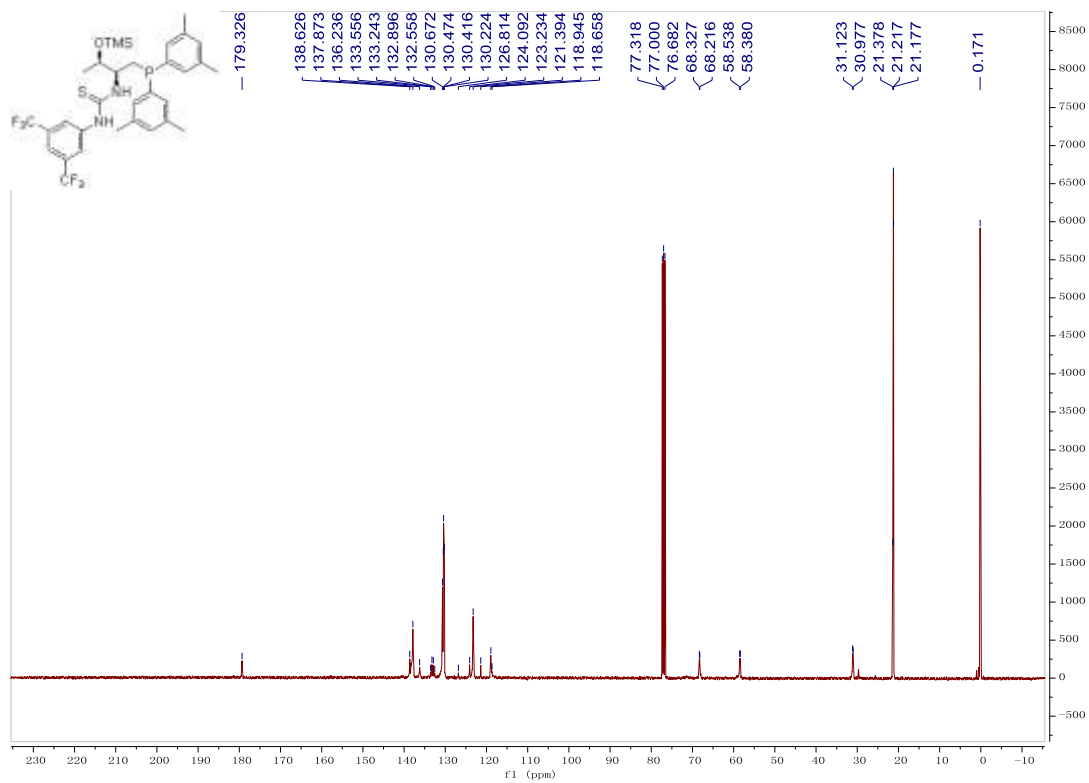

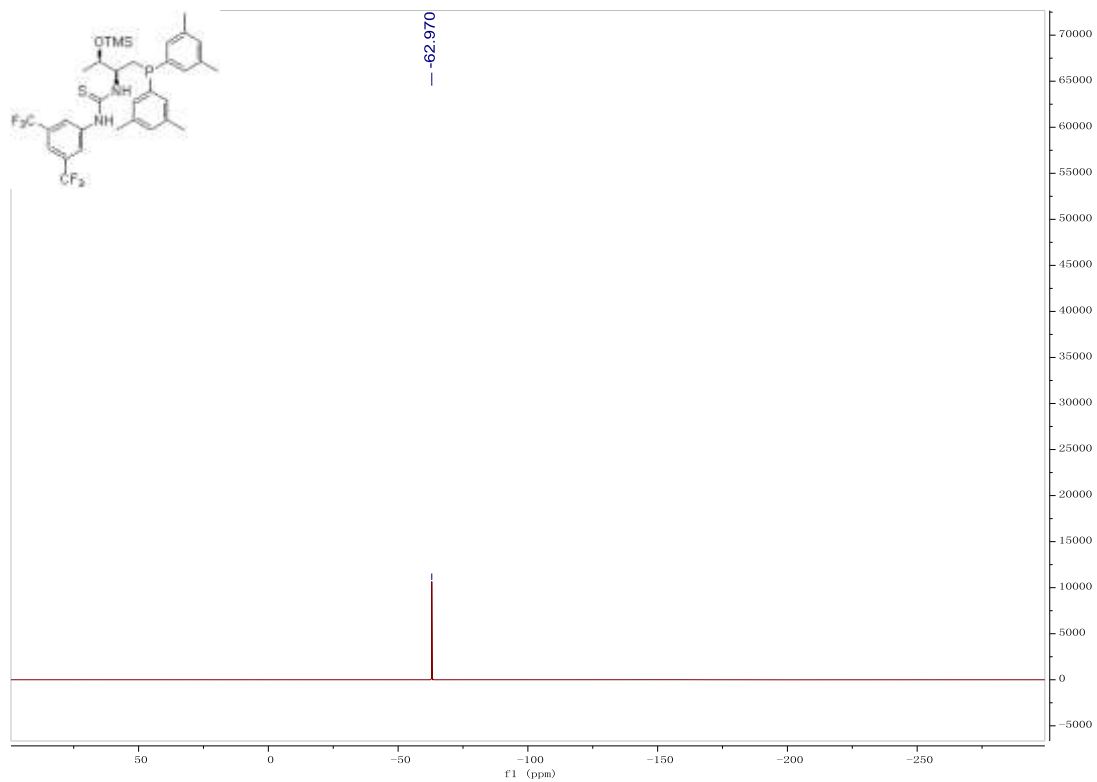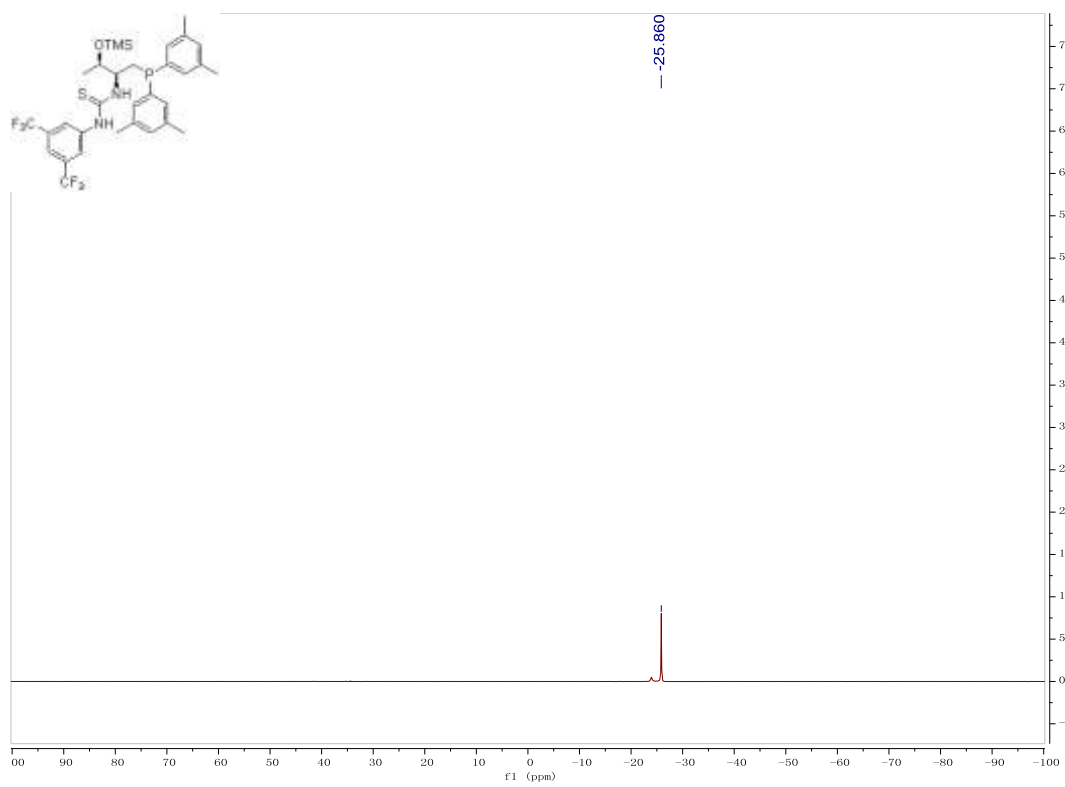

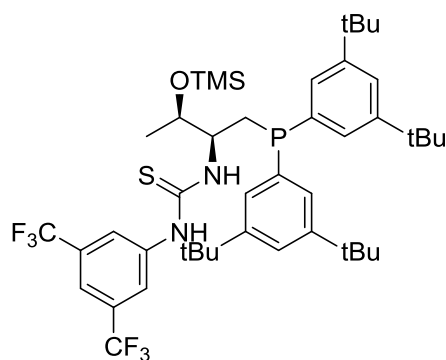

**1-((2S,3R)-1-(bis(3,5-di-tert-butylphenyl)phosphanyl)-3-((trimethylsilyloxy)butan-2-yl)-3-(3,5-bis(trifluoromethyl)phenyl)thiourea (N-CP2)**

A viscous liquid, 8% yield (67 mg).  $^1\text{H}$  NMR ( $\text{CDCl}_3$ , TMS, 400 MHz)  $\delta$  0.08 (s, 9H,  $3\text{CH}_3$ ), 1.18 (d,  $J = 2.0$  Hz, 3H,  $\text{CH}_3$ ), 1.25 (s, 18H,  $\text{CH}_3$ ), 1.29 (s, 18H,  $\text{CH}_3$ ), 2.05 (br, 1H), 2.69 (br, 1H), 4.44 (s, 2H), 6.72 (s, 1H), 7.22 (br, 2H), 7.33-7.46 (m, 5H), 7.66 (s, 1H, ArH), 7.71 (s, 1H, ArH), 8.01 (s, 1H, ArH).  $^{13}\text{C}$  NMR ( $\text{CDCl}_3$ , TMS, 100 MHz)  $\delta$  0.25, 29.6, 31.27, 31.44, 31.6, 34.9 (d,  $J = 6.1$  Hz), 58.8 (d,  $J = 19.8$  Hz), 68.7 (d,  $J = 11.1$  Hz), 115.9, 123.1, 123.3, 123.5, 124.1, 127.0, 135.1, 142.9, 150.5, 150.67, 150.73, 151.8, 179.5.  $^{19}\text{F}$  NMR ( $\text{CDCl}_3$ ,  $\text{CFCl}_3$ , 376 MHz)  $\delta$  -63.01.  $^{31}\text{P}$  NMR ( $\text{CDCl}_3$ , 85%  $\text{H}_3\text{PO}_4$ , 161.93 MHz):  $\delta$  -21.53. IR (EtOH)  $\nu$  3334, 3277, 2963, 2919, 1523, 1474, 1385, 1363, 1178, 1137  $\text{cm}^{-1}$ . HRMS (ESI) Calcd. For  $\text{C}_{44}\text{H}_{64}\text{F}_6\text{N}_2\text{OPSSi}^+1$  ( $\text{M}+\text{H}$ ) $^+$  requires 841.4145, Found: 841.4127.

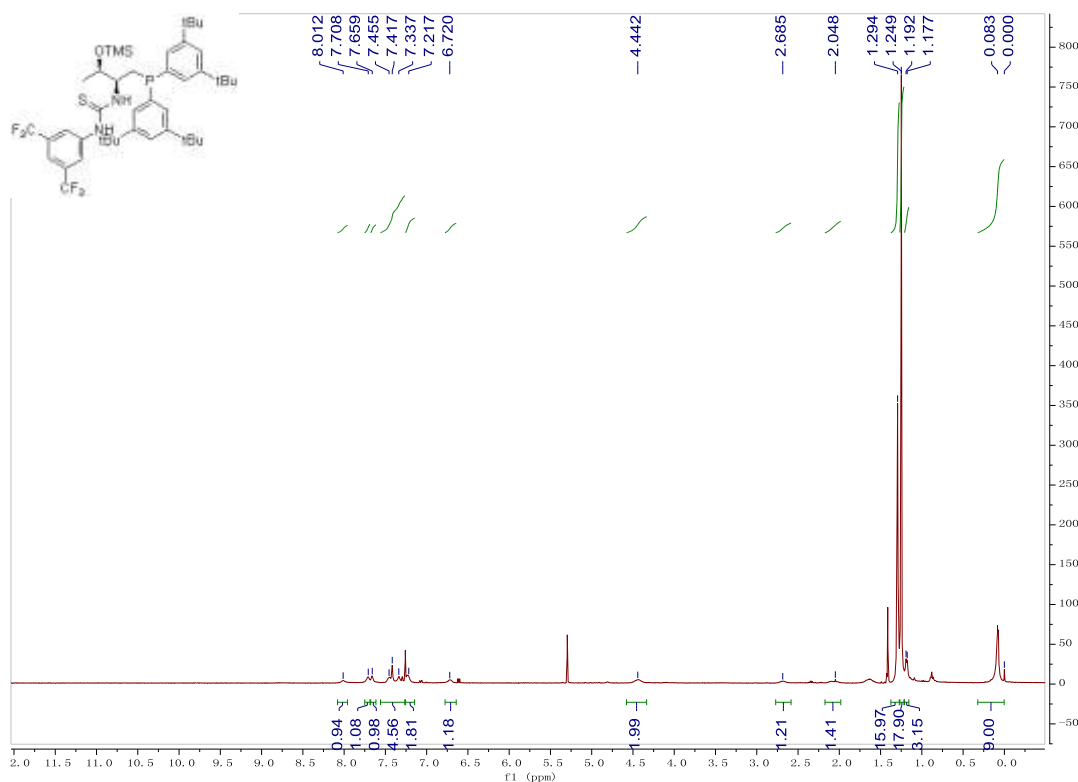

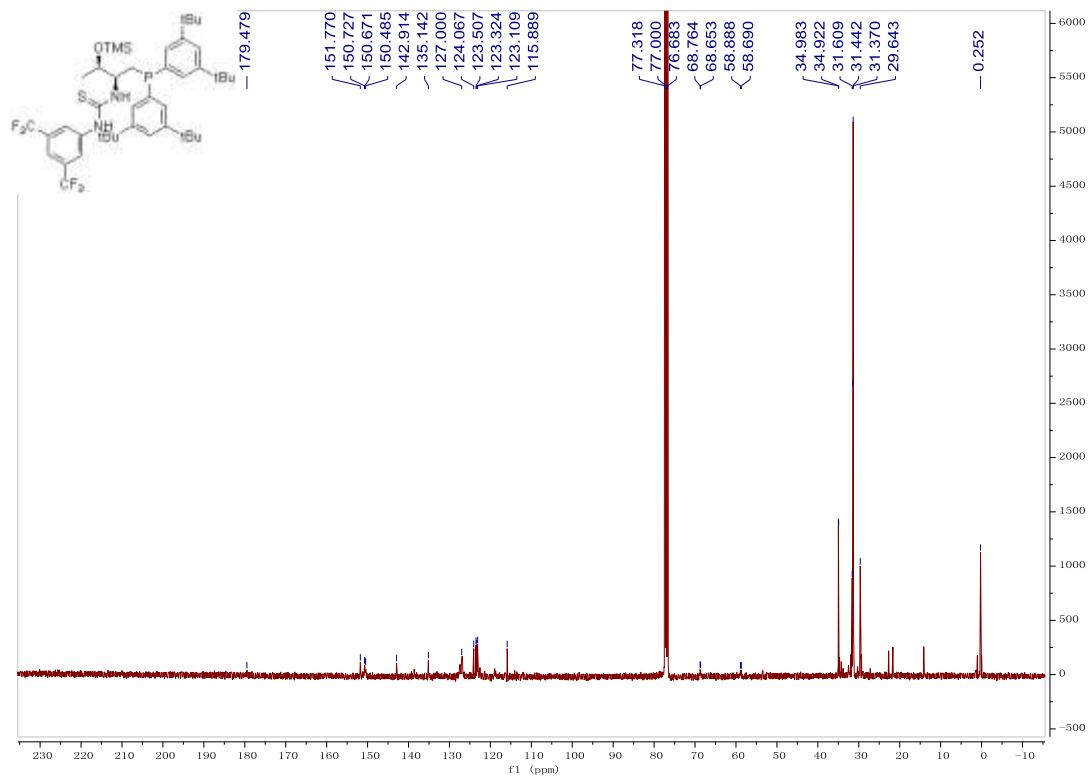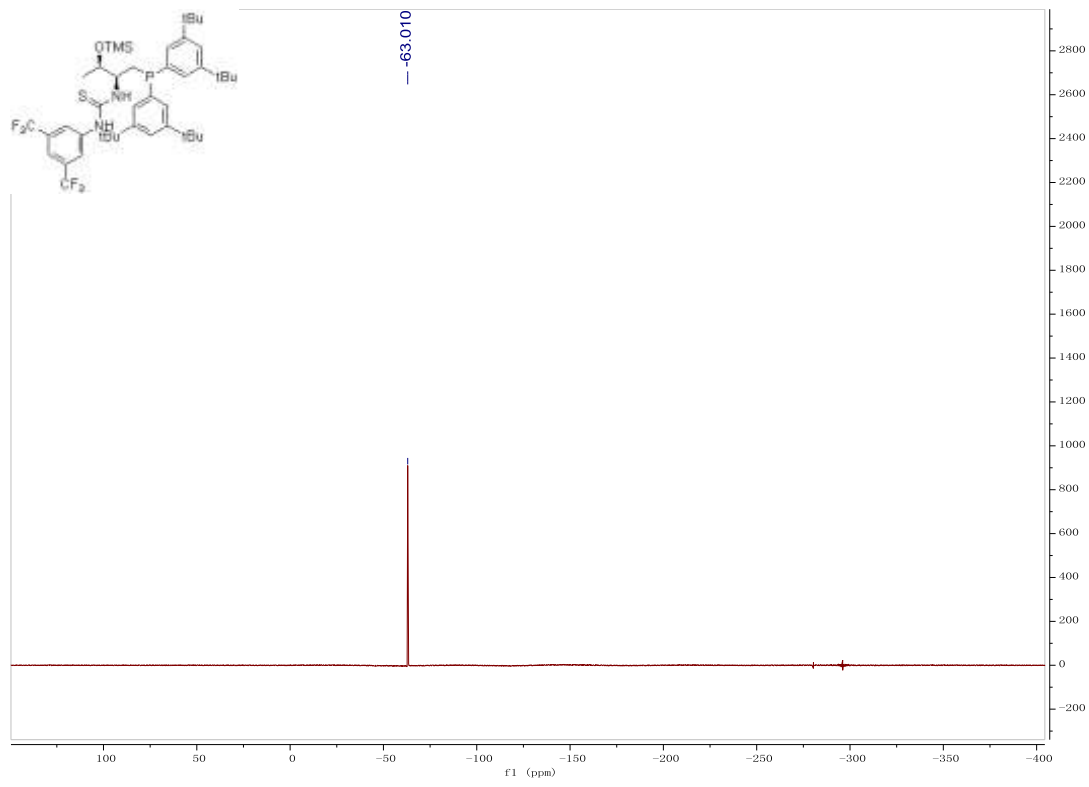

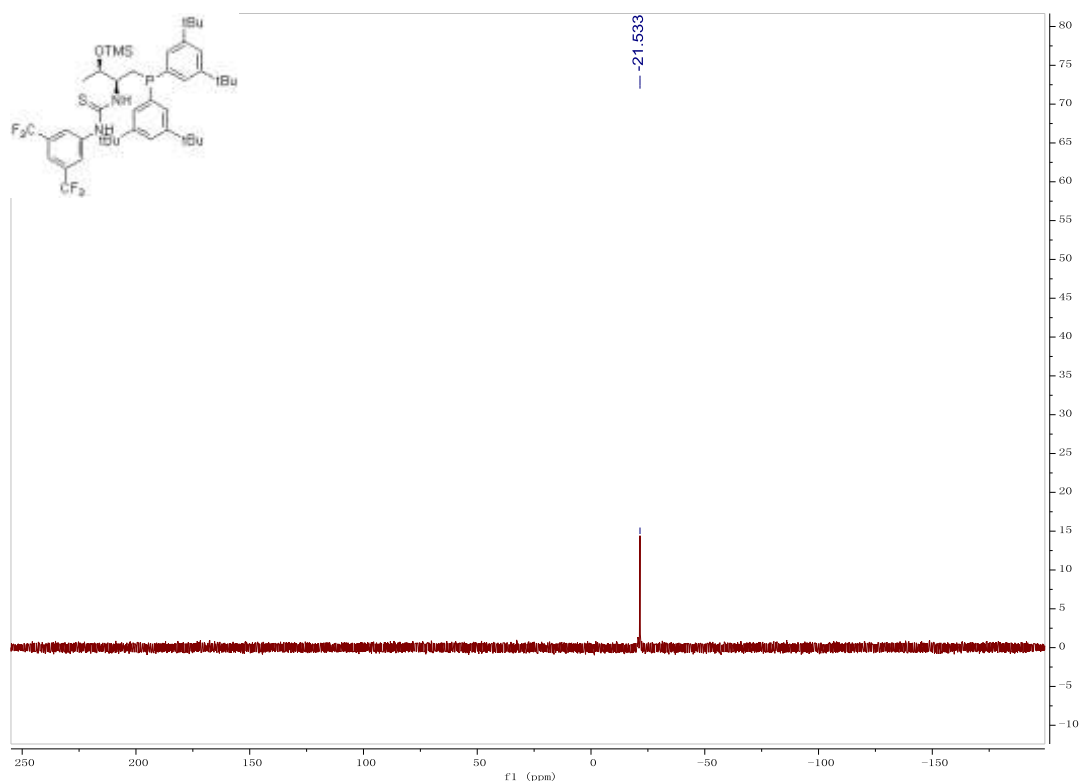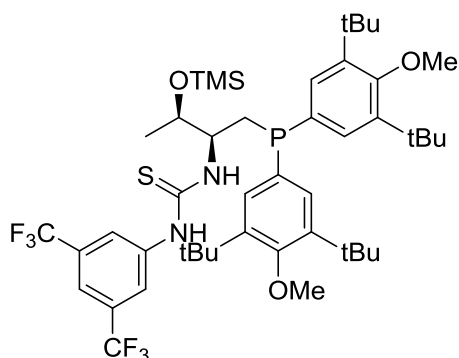

**1-((2S,3R)-1-(bis(3,5-di-tert-butyl-4-methoxyphenyl)phosphanyl)-3-((trimethylsilyl)oxy)butan-2-yl)-3-(3,5-bis(trifluoromethyl)phenyl)thiourea (N-CP3)**

A white solid, 4% yield (36 mg). M.p.: 79-81 °C. <sup>1</sup>H NMR (CDCl<sub>3</sub>, TMS, 400 MHz) δ 0.07 (s, 9H, 3CH<sub>3</sub>), 1.19 (br, 3H, CH<sub>3</sub>), 1.35 (s, 18H, CH<sub>3</sub>), 1.40 (s, 18H, CH<sub>3</sub>), 2.05 (br, 1H), 2.55 (br, 1H), 3.65 (s, 3H, CH<sub>3</sub>), 3.68 (s, 3H, CH<sub>3</sub>), 4.41 (br, 2H), 6.72 (d, *J* = 7.2 Hz, 2H), 7.23 (br, 2H), 7.41 (br, 2H), 7.67 (s, 1H, ArH), 7.72 (s, 1H, ArH), 7.91 (s, 1H, ArH). <sup>13</sup>C NMR (CDCl<sub>3</sub>, TMS, 100 MHz) δ 0.22, 21.5, 31.97, 32.02, 35.9 (d, *J* = 3.7 Hz), 58.5 (d, *J* = 15.6 Hz), 64.2, 64.3, 68.4 (d, *J* = 9.5 Hz), 119.0 (br), 122.7 (q, *J* = 271.5 Hz), 123.2 (br), 129.7, 129.8, 131.0, 131.2, 131.5, 131.7, 133.2 (q, *J* = 34.0 Hz), 138.7, 143.4, 143.7, 160.0, 160.6, 179.3. <sup>19</sup>F NMR (CDCl<sub>3</sub>, CFC<sub>3</sub>, 376 MHz) δ -63.03. <sup>31</sup>P NMR (CDCl<sub>3</sub>, 85% H<sub>3</sub>PO<sub>4</sub>, 161.93 MHz): δ -23.35. IR (EtOH) ν 3269, 3013, 2961, 1524, 1409,



1383, 1276, 1134, 1009, 739  $\text{cm}^{-1}$ . HRMS (ESI) Calcd. For  $\text{C}_{46}\text{H}_{68}\text{F}_6\text{N}_2\text{O}_3\text{PSSi}^{+1}$  ( $\text{M}+\text{H}$ )<sup>+</sup> requires 901.4356, Found: 901.4340.

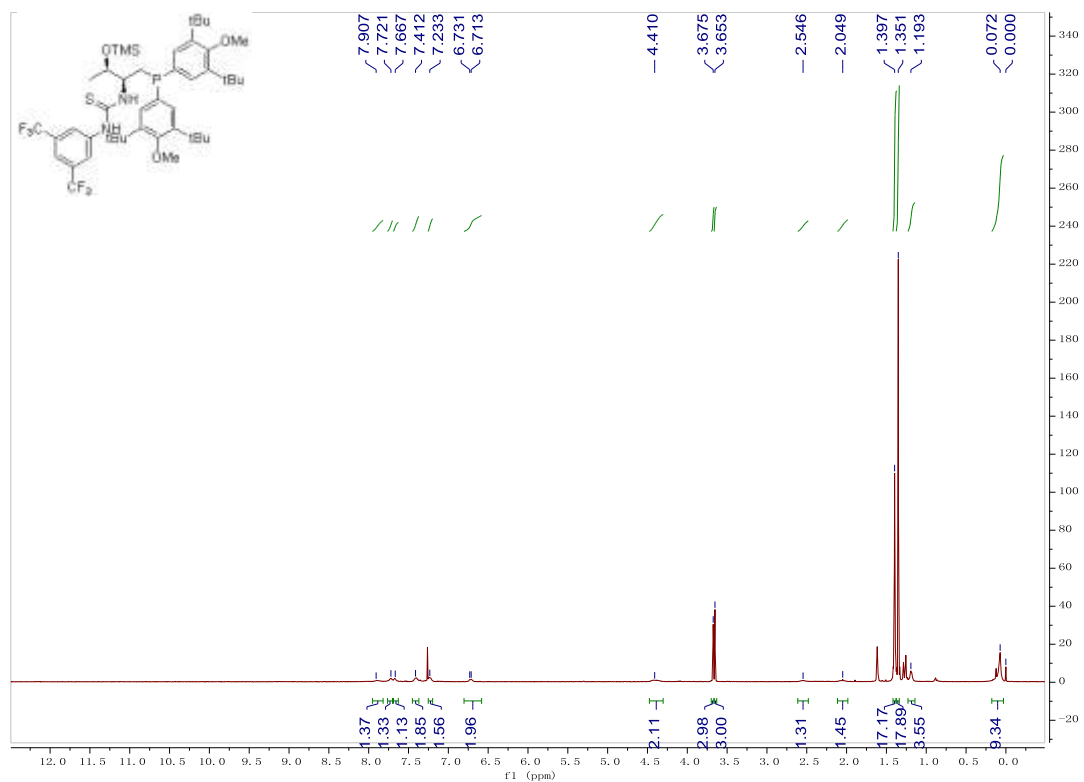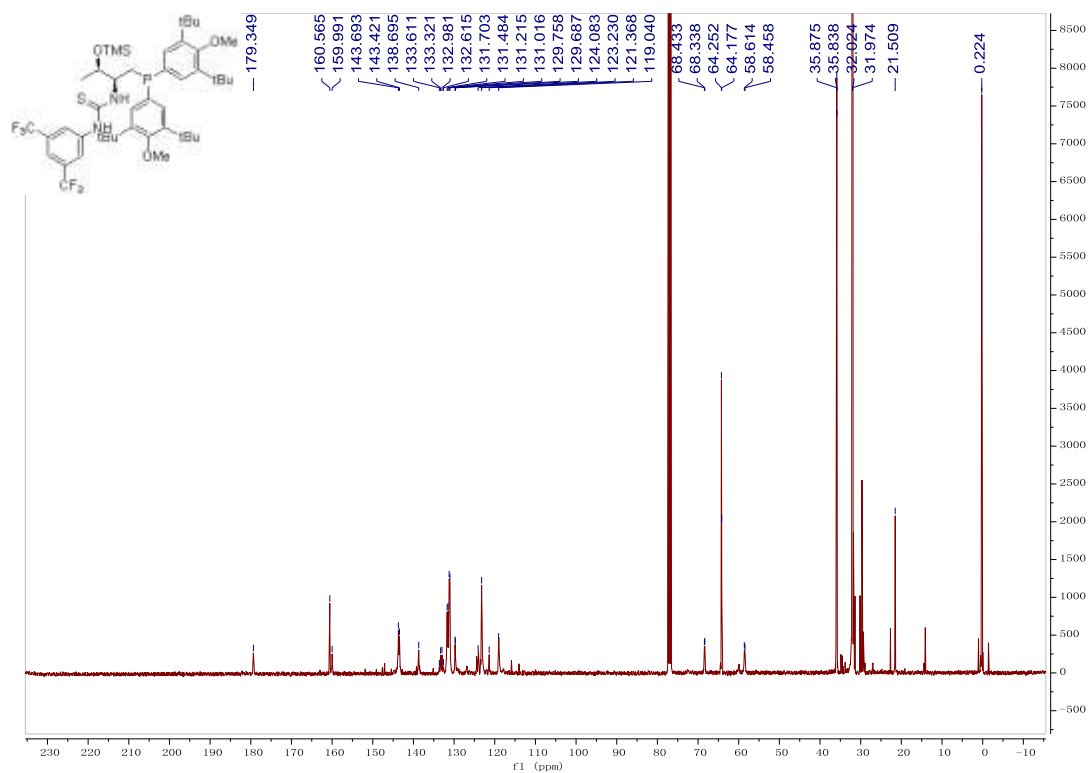

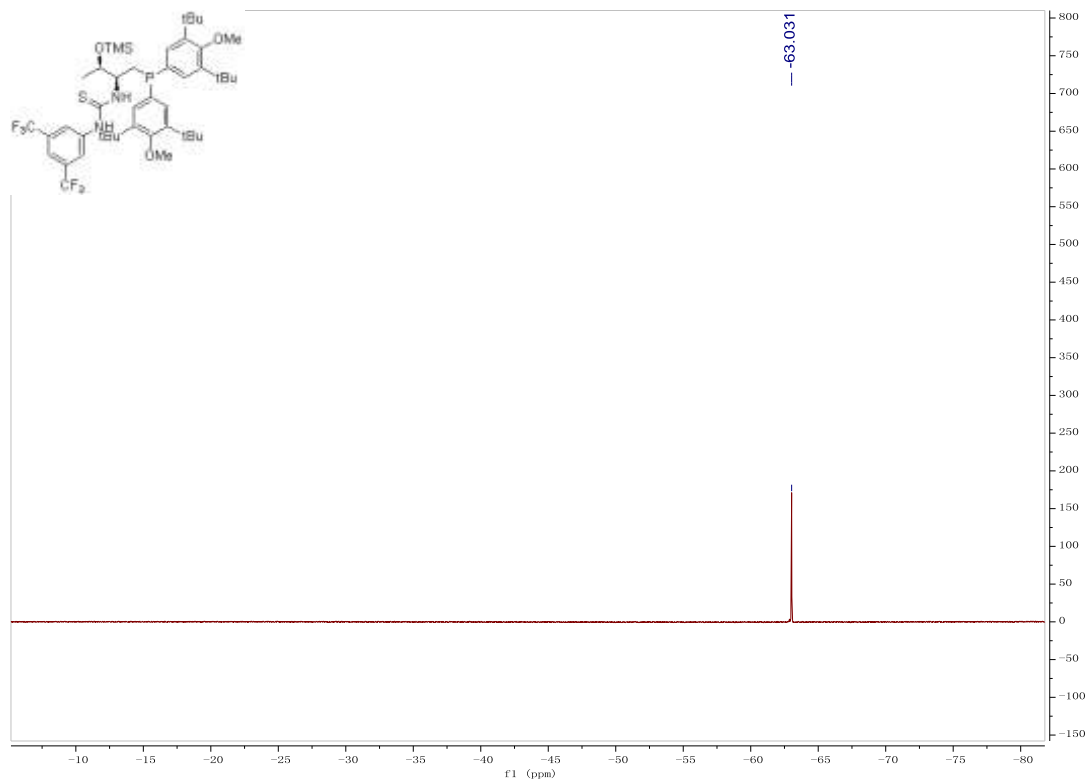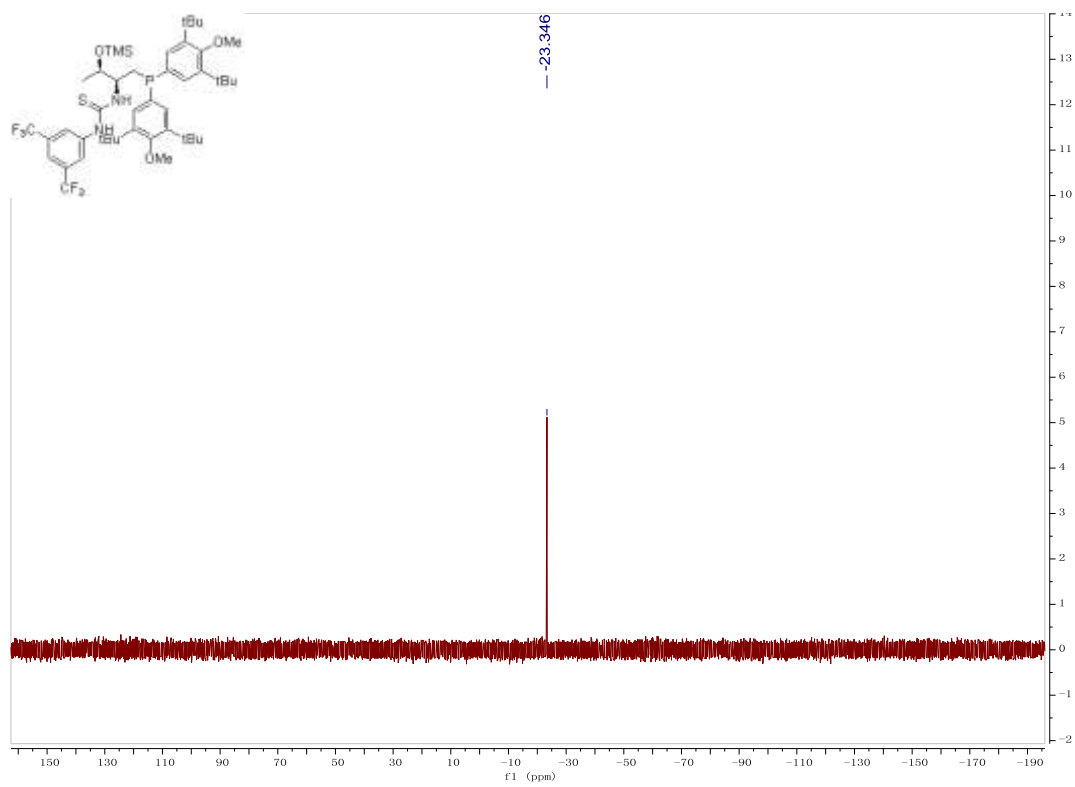

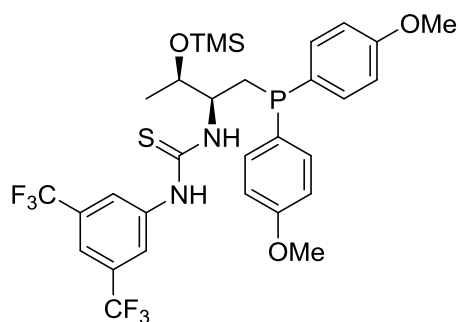

**1-((2S,3R)-1-(bis(4-methoxyphenyl)phosphanyl)-3-((trimethylsilyl)oxy)butan-2-yl)-3-(3,5-bis(trifluoromethyl)phenyl)thiourea (N-CP4)**

A white solid, 21% yield (142 mg). M.p.: 77-79 °C.  $^1\text{H}$  NMR ( $\text{CDCl}_3$ , TMS, 400 MHz)  $\delta$  0.08 (s, 9H, 3CH<sub>3</sub>), 1.16 (s, 3H, CH<sub>3</sub>), 2.08 (br, 1H), 2.55 (br, 1H), 3.77 (s, 3H, CH<sub>3</sub>), 3.78 (s, 3H, CH<sub>3</sub>), 4.36 (br, 2H), 6.73 (br, 2H), 6.84 (d,  $J$  = 8.4 Hz, 1H), 6.88 (d,  $J$  = 8.0 Hz, 1H), 7.33 (br, 2H), 7.54 (br, 2H), 7.53-7.90 (m, 3H, ArH), 8.41 (s, 1H, ArH).  $^{13}\text{C}$  NMR ( $\text{CDCl}_3$ , TMS, 100 MHz)  $\delta$  0.20, 31.4, 31.9 (d,  $J$  = 14.2 Hz), 55.11, 55.14, 58.4 (d,  $J$  = 11.3 Hz), 68.6 (d,  $J$  = 10.5 Hz), 114.2, 118.9, 122.8 (q,  $J$  = 269.2 Hz), 123.2, 127.8, 133.1 (q,  $J$  = 33.4 Hz), 133.9, 134.2, 134.3, 134.5, 138.6, 160.1, 160.4, 179.5.  $^{19}\text{F}$  NMR ( $\text{CDCl}_3$ ,  $\text{CFCl}_3$ , 376 MHz)  $\delta$  -63.01.  $^{31}\text{P}$  NMR ( $\text{CDCl}_3$ , 85%  $\text{H}_3\text{PO}_4$ , 161.93 MHz):  $\delta$  -28.57. IR (EtOH)  $\nu$  3358, 3272, 3019, 2961, 1523, 1471, 1276, 1176, 1134, 1115  $\text{cm}^{-1}$ . HRMS (ESI) Calcd. For  $\text{C}_{30}\text{H}_{36}\text{F}_6\text{N}_2\text{O}_3\text{PSSi}^+1$  ( $\text{M}+\text{H}$ )<sup>+</sup> requires 677.1852, Found: 677.1836.

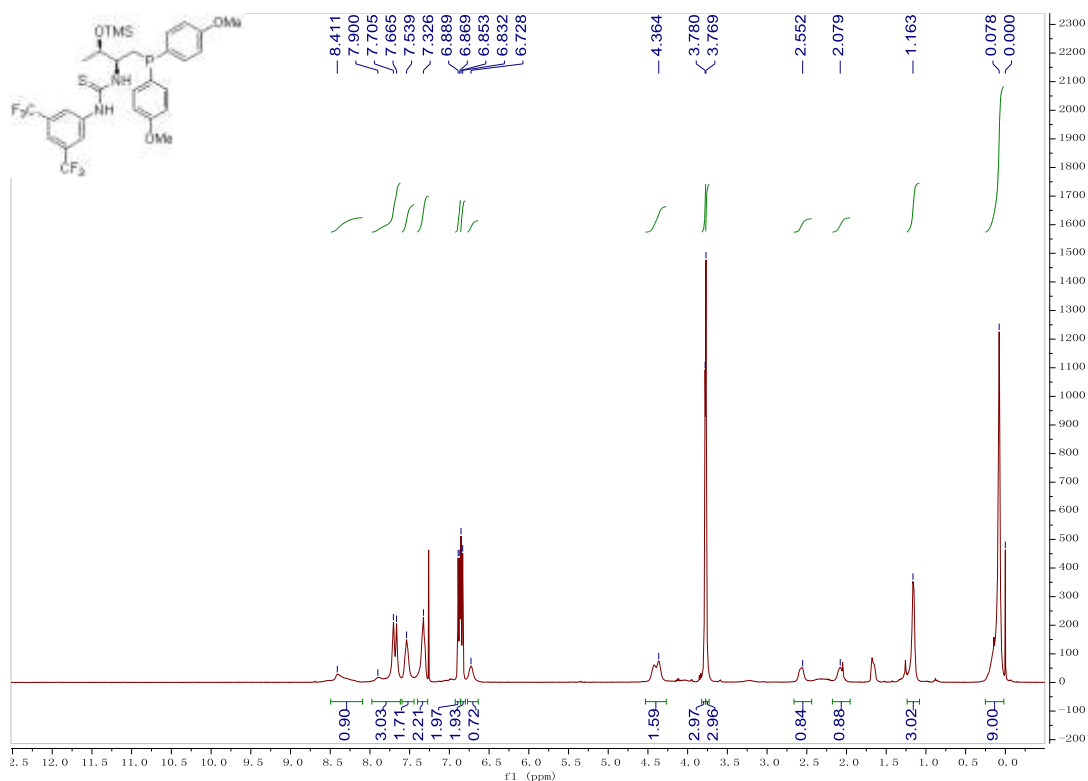

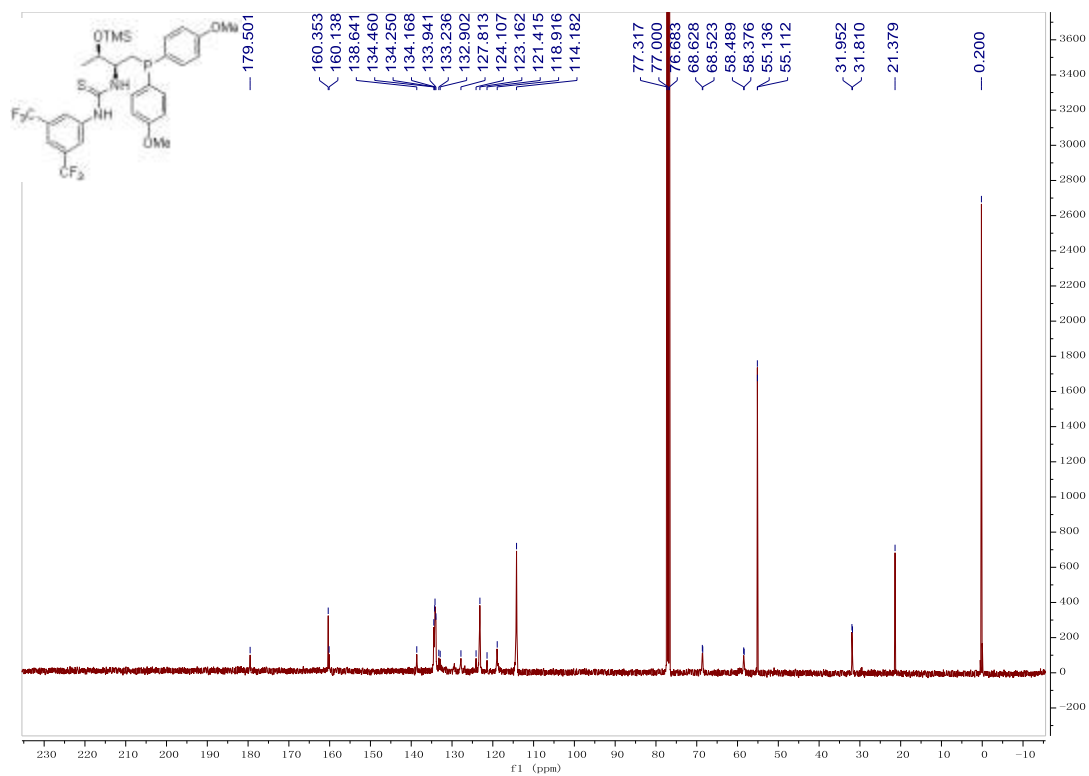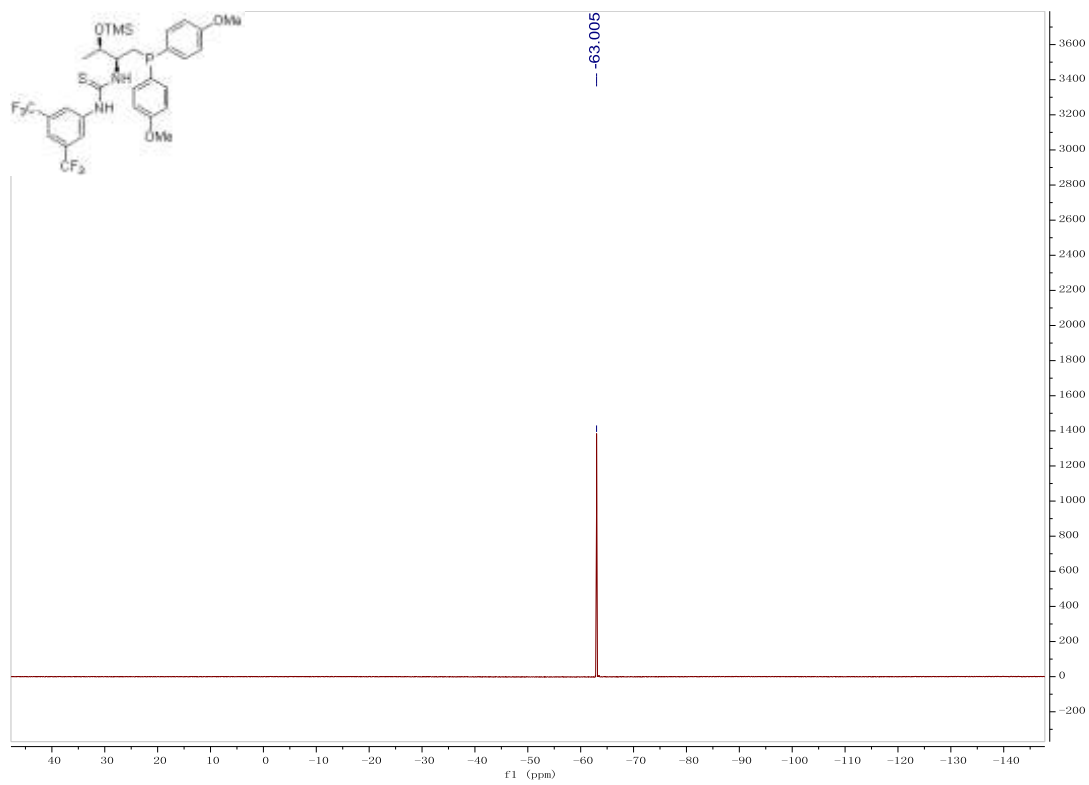

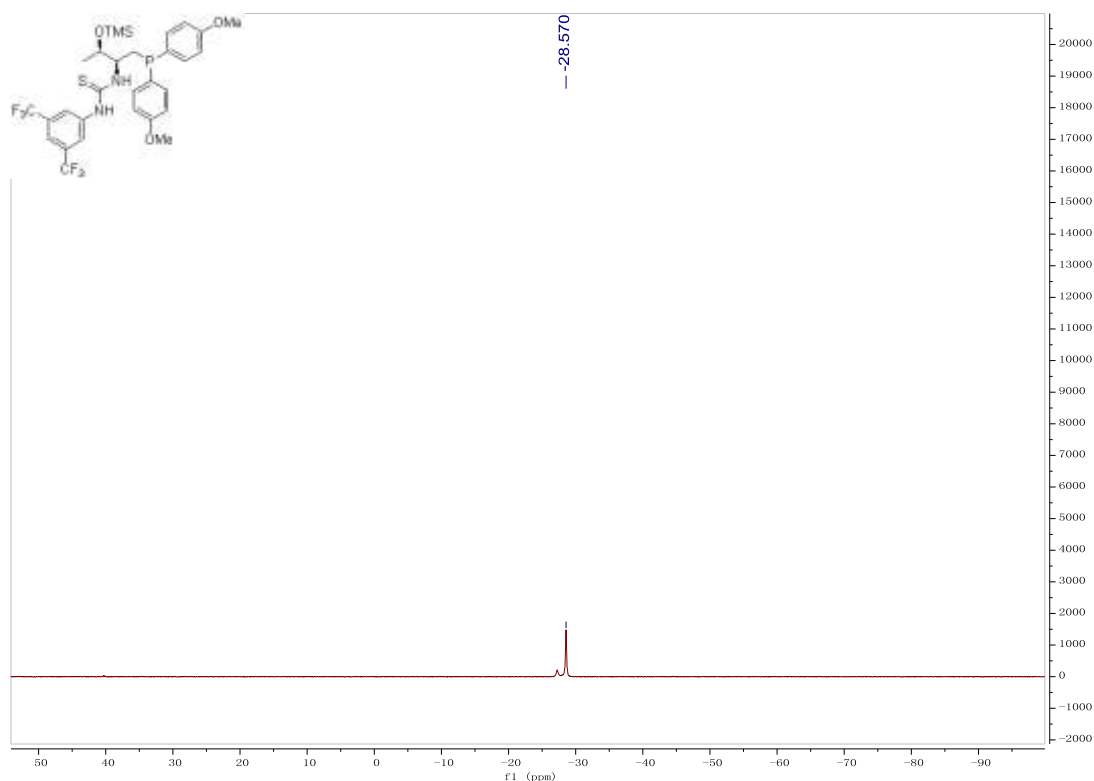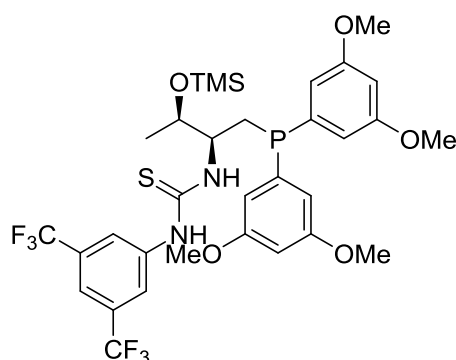

**1-((2S,3R)-1-(bis(3,5-dimethoxyphenyl)phosphanyl)-3-((trimethylsilyl)oxy)butan-2-yl)-3-(3,5-bis(trifluoromethyl)phenyl)thiourea (N-CP5)**

A white solid, unstable, 9% yield (66 mg). M.p.: 86-88 °C.  $^1\text{H}$  NMR ( $\text{CDCl}_3$ , TMS, 400 MHz)  $\delta$  0.08 (s, 9H, 3 $\text{CH}_3$ ), 1.16 (s, 3H,  $\text{CH}_3$ ), 2.12 (br, 1H), 2.62 (br, 1H), 3.73 (s, 6H,  $\text{CH}_3$ ), 3.75 (s, 6H,  $\text{CH}_3$ ), 4.31 (s, 1H), 4.54 (s, 1H), 6.39 (d,  $J = 6.8$  Hz, 2H), 6.56 (d,  $J = 7.6$  Hz, 2H), 6.59-6.75 (m, 3H), 7.67 (s, 3H, ArH), 8.36 (s, 1H, ArH).  $^{19}\text{F}$  NMR ( $\text{CDCl}_3$ ,  $\text{CFCl}_3$ , 376 MHz)  $\delta$  -63.01.  $^{31}\text{P}$  NMR ( $\text{CDCl}_3$ , 85%  $\text{H}_3\text{PO}_4$ , 161.93 MHz):  $\delta$  -19.26. IR (EtOH)  $\nu$  3355, 2959, 2836, 1584, 1458, 1383, 1277, 1155, 1132, 1045, 841  $\text{cm}^{-1}$ . HRMS (ESI) Calcd. For  $\text{C}_{32}\text{H}_{40}\text{F}_6\text{N}_2\text{O}_3\text{PSSi}^{+1}$  ( $\text{M}+\text{H}$ ) $^+$  requires 737.2064, Found: 737.2045.

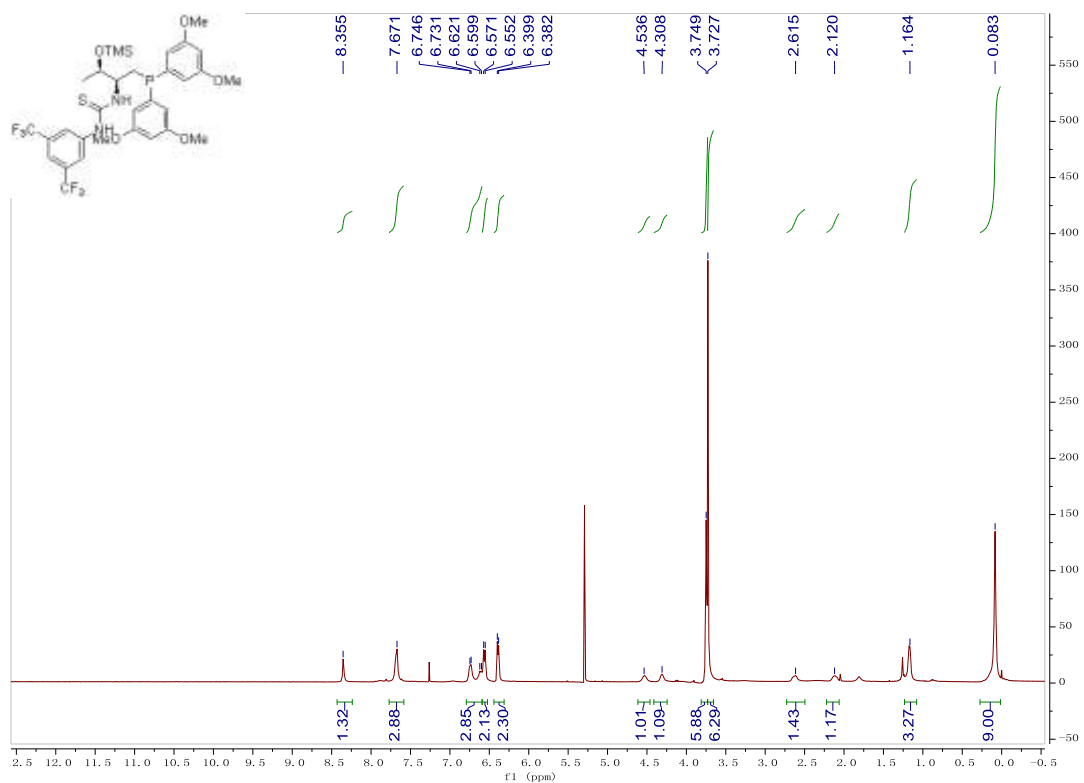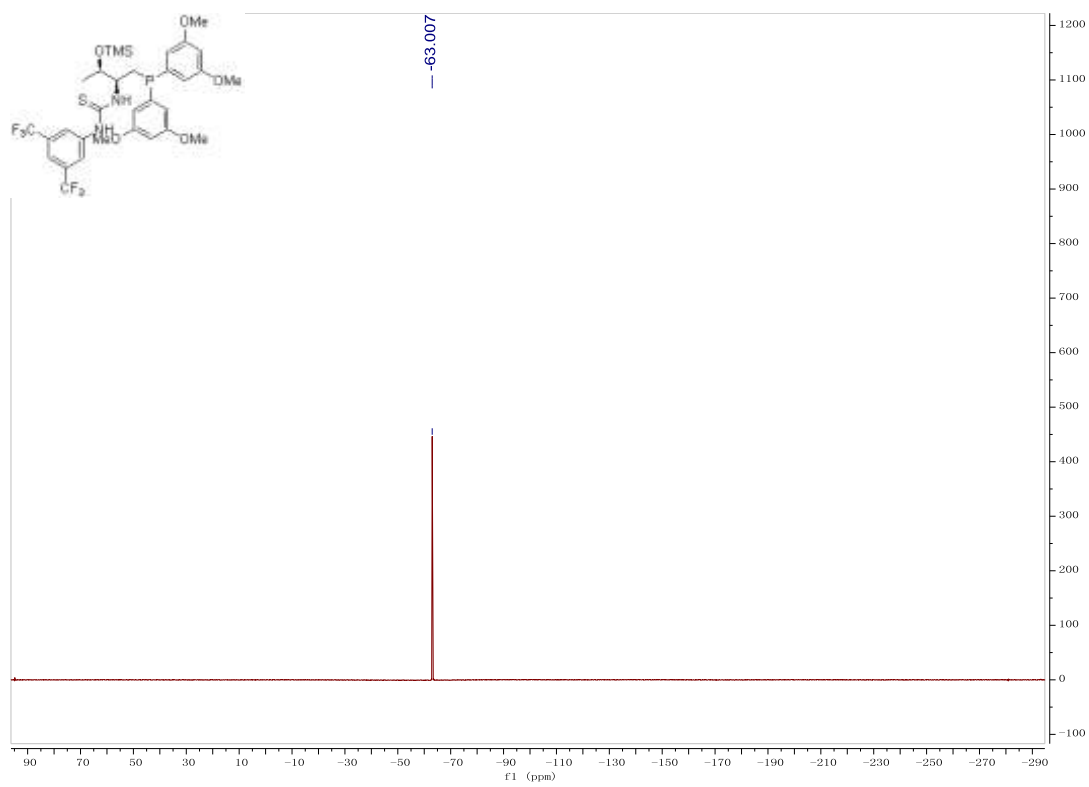

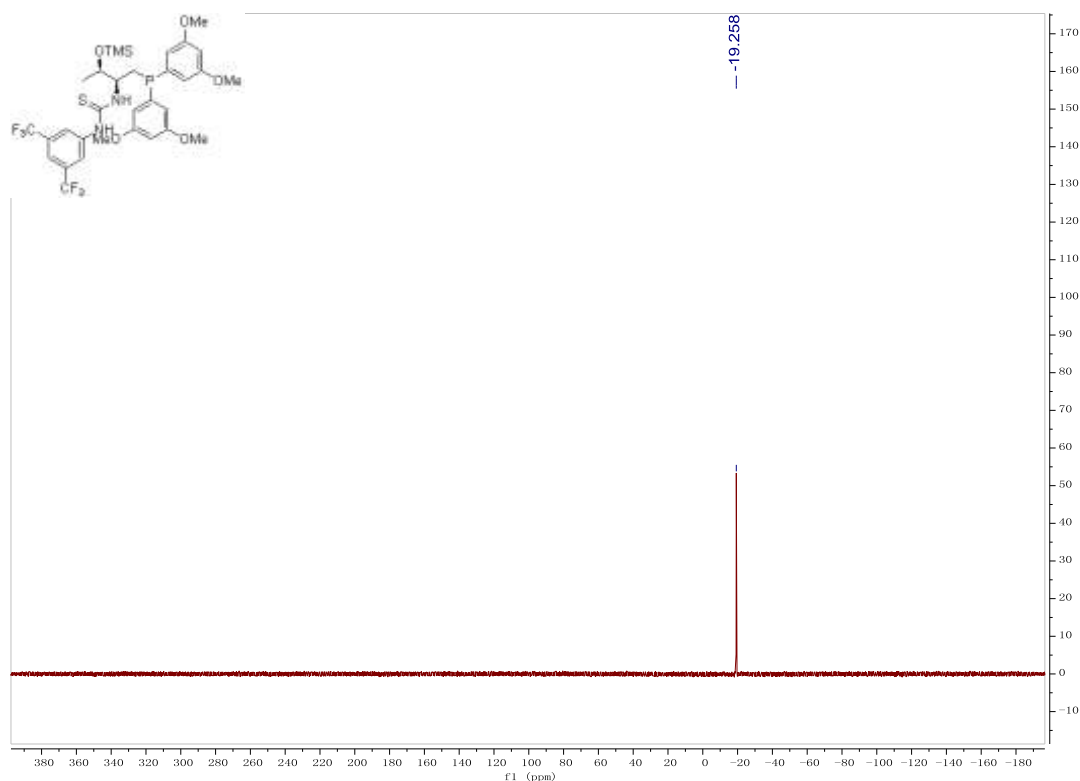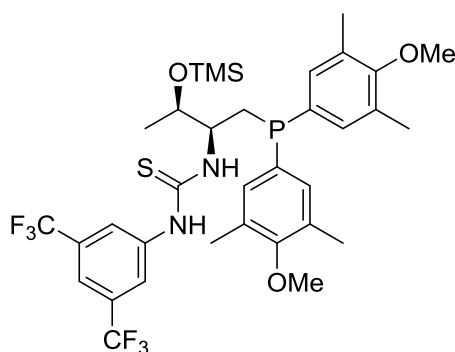

**1-((2S,3R)-1-(bis(4-methoxy-3,5-dimethylphenyl)phosphanyl)-3-((trimethylsilyl)oxy)butan-2-yl)-3-(3,5-bis(trifluoromethyl)phenyl)thiourea (N-CP6)**

A white solid, 13% yield (95 mg). M.p.: 68-60 °C.  $^1\text{H}$  NMR ( $\text{CDCl}_3$ , TMS, 400 MHz)  $\delta$  0.07 (s, 9H, 3 $\text{CH}_3$ ), 1.14 (d,  $J = 4.0$  Hz,  $\text{CH}_3$ ), 2.02 (br, 1H), 2.22 (s, 6H,  $\text{CH}_3$ ), 2.26 (s, 6H,  $\text{CH}_3$ ), 2.59 (d,  $J = 11.2$  Hz,  $\text{CH}_3$ ), 3.69 (s, 3H,  $\text{CH}_3$ ), 3.71 (s, 3H,  $\text{CH}_3$ ), 4.35 (s, 2H), 4.42 (s, 2H), 6.81 (s, 1H), 7.03 (d,  $J = 6.8$  Hz, 2H), 7.32 (d,  $J = 6.4$  Hz, 2H), 7.67-8.00 (m, 3H, ArH), 8.72 (s, 1H, ArH).  $^{13}\text{C}$  NMR ( $\text{CDCl}_3$ , TMS, 100 MHz)  $\delta$  0.17, 16.0, 16.1, 21.4, 31.4 (d,  $J = 14.6$  Hz), 58.4 (d,  $J = 18.3$  Hz), 59.5, 59.6, 67.9 (d,  $J = 10.5$  Hz), 119.0, 122.7 (q,  $J = 271.7$  Hz), 123.3, 126.8, 130.9, 130.97, 131.03, 131.1, 132.9, 133.1, 133.3, 133.5, 138.7, 157.6, 157.8, 179.3.  $^{19}\text{F}$  NMR ( $\text{CDCl}_3$ ,  $\text{CFCl}_3$ , 376 MHz)  $\delta$  -62.98.  $^{31}\text{P}$  NMR ( $\text{CDCl}_3$ , 85%  $\text{H}_3\text{PO}_4$ , 161.93 MHz):  $\delta$  -27.95. IR (EtOH)  $\nu$  3298, 2930, 2857,

1473, 1384, 1276, 1173, 1133, 1013, 884  $\text{cm}^{-1}$ . HRMS (ESI) Calcd. For  $\text{C}_{34}\text{H}_{44}\text{F}_6\text{N}_2\text{O}_3\text{PSSi}^+$   
 $(\text{M}+\text{H})^+$  requires 733.2478, Found: 733.2461.

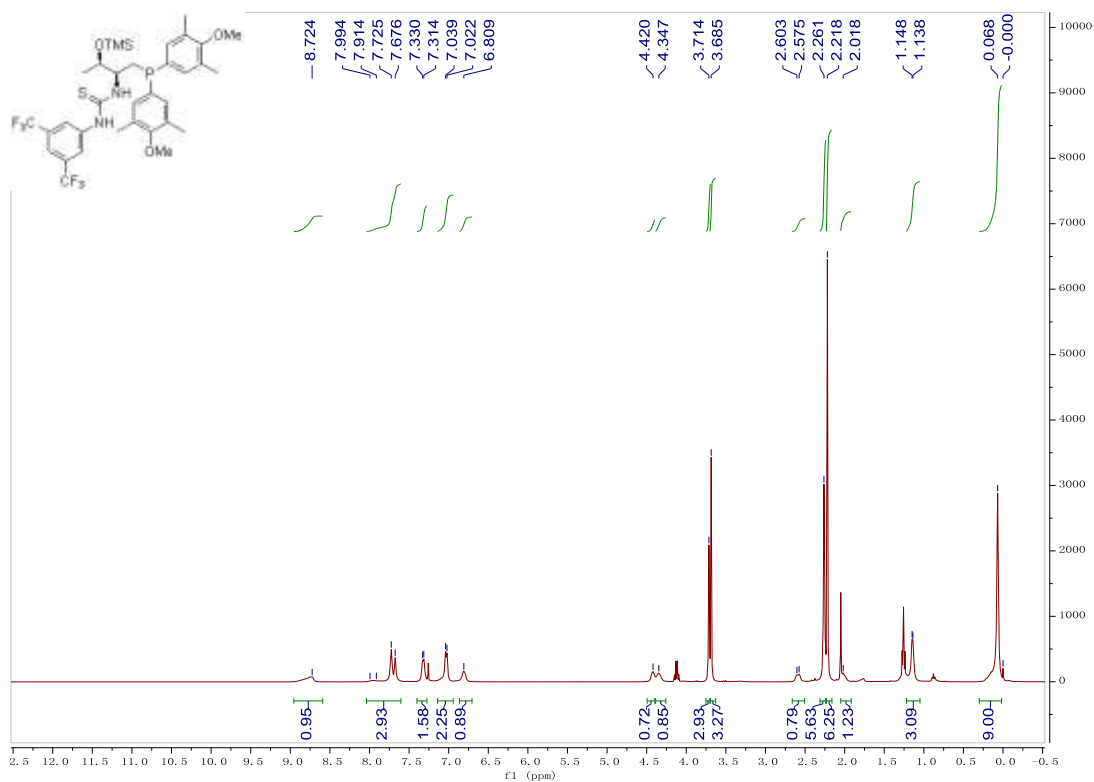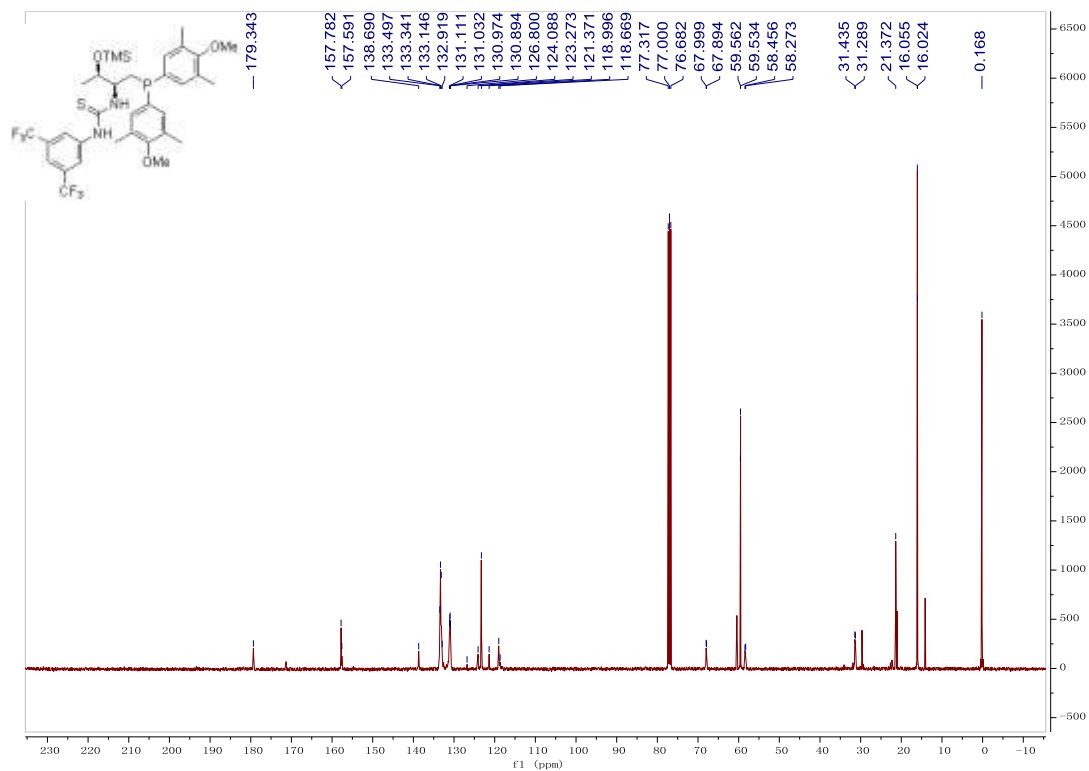



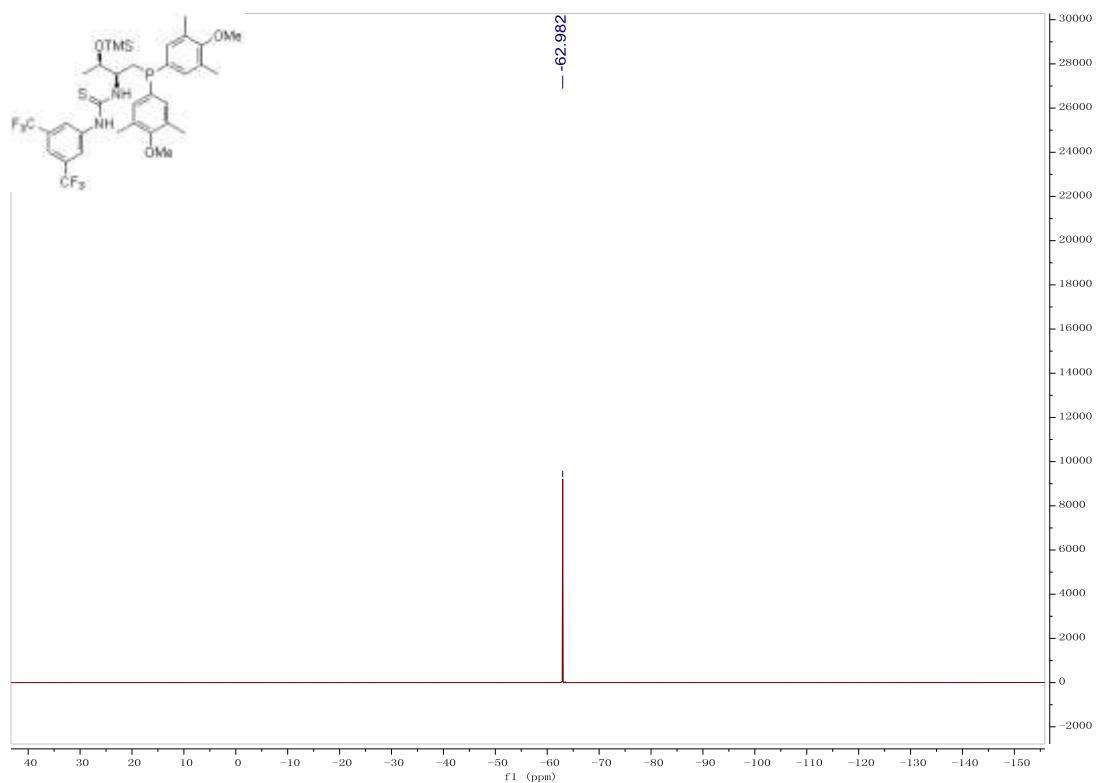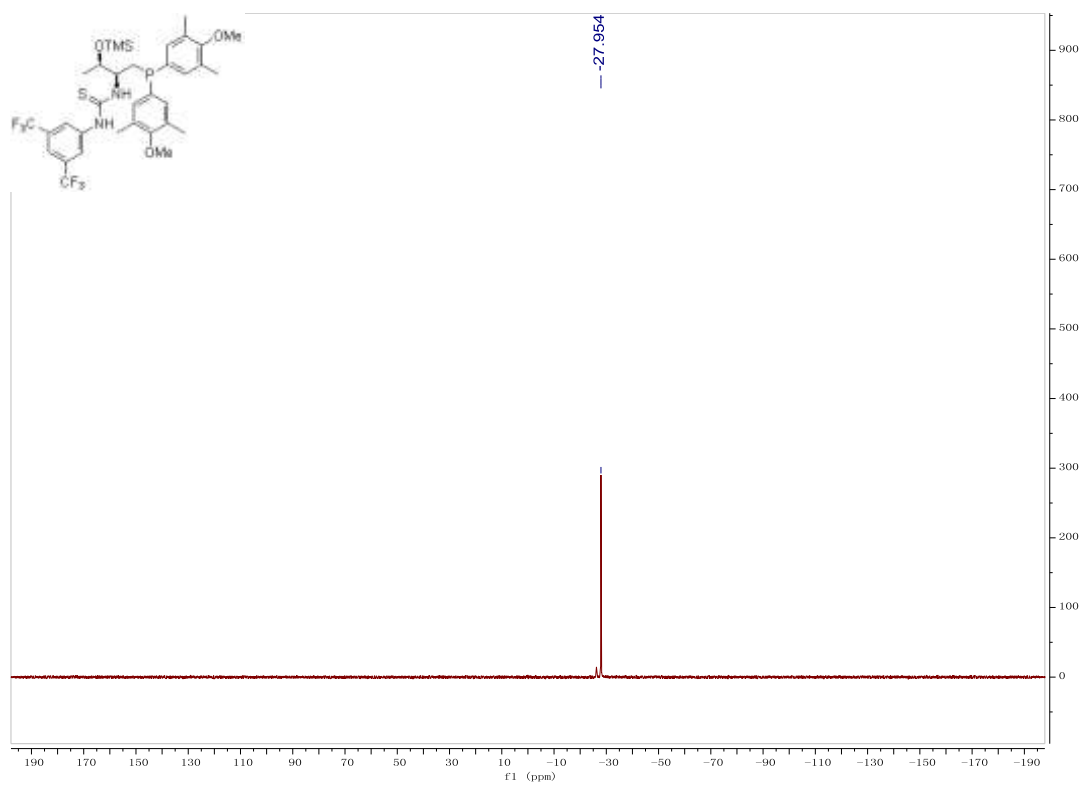

## 6. Kinetic Resolutions *via* Carbon Dioxide Fixation of $\gamma$ -Hydroxyl Alkynone **1**.

A Schlenk tube was heated under vacuum to remove ambient moisture and water, then filled with argon. After the Schlenk tube was returned to room temperature,  $\gamma$ -hydroxyl alkynone **1** (0.1 mmol) was added. Then the system was vacuumed and filled with CO<sub>2</sub>. After repeating three times, THF (0.5 mL) was added and the reaction mixture was stirred for 10 minutes at indicated temperature. Then, chiral phosphine (0.01~0.04 mmol) was dissolved in 100  $\mu$ L THF and slowly added to the reaction mixture at indicated temperature. After that, the resulting mixture was stirred overnight. After the reaction was finished, the solution was directly subjected to a flash column chromatography (PE:EA:DCM = 20:1:1~5:1:1) on silica gel to separate chiral  $\gamma$ -hydroxyl alkynone **1** and chiral cyclic carbonate **2** quickly.

**Table S1.** Optimization of the reaction conditions with a variety of chiral phosphines.

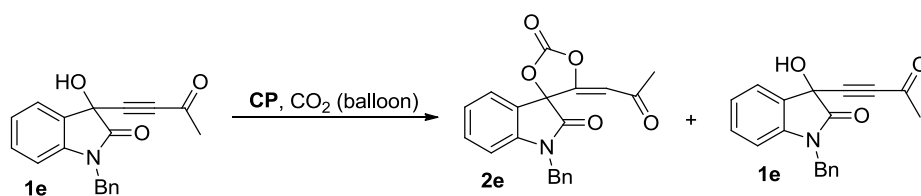

| entry <sup>[a]</sup> | CP             | solvent | temp (°C) | time (h) | conv. (%) | yield (%) <sup>[b]</sup> |    | ee (%) <sup>[c]</sup> |     |
|----------------------|----------------|---------|-----------|----------|-----------|--------------------------|----|-----------------------|-----|
|                      |                |         |           |          |           | 2e                       | 1e | 2e                    | 1e  |
| 1                    | CP1 (20 mol%)  | THF     | -20       | 9        | >50       | 34                       | -  | 12                    | -   |
| 2                    | CP2 (20 mol%)  | THF     | -15       | 11       | >99       | -                        | -  | -                     | -   |
| 3                    | CP2 (20 mol%)  | THF     | -20       | 4        | >99       | -                        | -  | -                     | -   |
| 4                    | CP3            | THF     | -20       | 2.5      | 51        | 43                       | 49 | 30                    | 11  |
| 5                    | CP3 (5 mol%)   | THF     | -20       | 5        | 34        | 29                       | 66 | 27                    | 11  |
| 6                    | CP3            | THF     | -20       | 12       | 54        | 46                       | 46 | 33                    | 34  |
| 7                    | CP4            | THF     | -40       | 12       | 60        | 47                       | 39 | 40                    | 36  |
| 8                    | CP5 (20 mol%)  | THF     | -40       | 12       | 31        | 29                       | 68 | 68                    | 22  |
| 9                    | CP6 (20 mol%)  | THF     | -20       | 12       | 64        | 29                       | 6  | 36                    | rac |
| 10                   | CP7            | THF     | -40       | 12       | trace     | -                        | -  | -                     | -   |
| 11                   | CP8            | THF     | -40       | 12       | trace     | -                        | -  | -                     | -   |
| 12                   | CP9            | THF     | -20       | 8        | nr        | -                        | -  | -                     | -   |
| 13                   | CP9            | THF     | r.t       | 12       | trace     | -                        | -  | -                     | -   |
| 14                   | CP10           | THF     | -20       | 8        | trace     | -                        | -  | -                     | -   |
| 15                   | CP10           | THF     | r.t       | 12       | complex   | -                        | -  | -                     | -   |
| 16                   | CP10           | THF     | 10        | 12       | 67        | 26                       | 33 | 5                     | -   |
| 17                   | CP11           | THF     | -20       | 12       | -         | -                        | -  | -                     | -   |
| 18                   | CP12           | THF     | -40       | 12       | -         | -                        | -  | -                     | -   |
| 19                   | CP12           | THF     | -20       | 12       | -         | -                        | -  | -                     | -   |
| 20                   | CP13 (20 mol%) | THF     | -20       | 4        | complex   | -                        | -  | -                     | -   |

<sup>[a]</sup> The reaction was carried out using **1e** (0.1 mmol), cat. (0.01~0.04 mmol), in the indicated solvent (0.5 mL) in a Schlenk tube at the indicated temperature. <sup>[b]</sup> Isolated yields. <sup>[c]</sup> The ee value was determined by HPLC analysis using a chiral stationary phase.

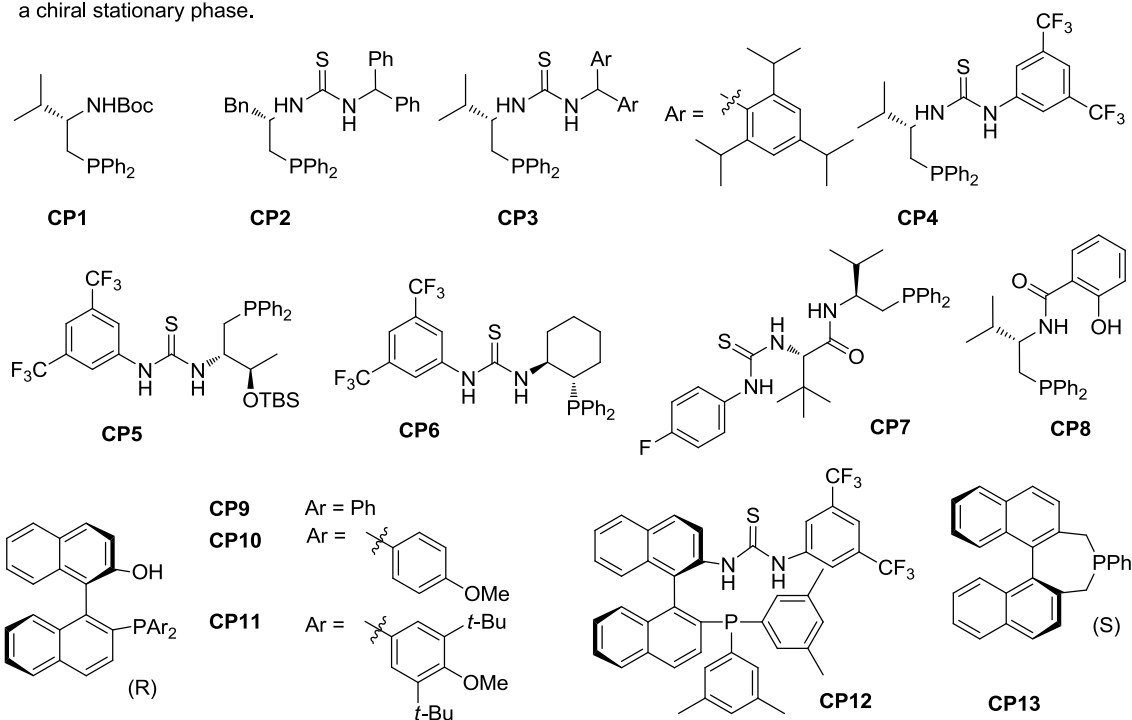

**Table S2.** Optimization of the reaction conditions with threonine derived chiral phosphines as catalysts

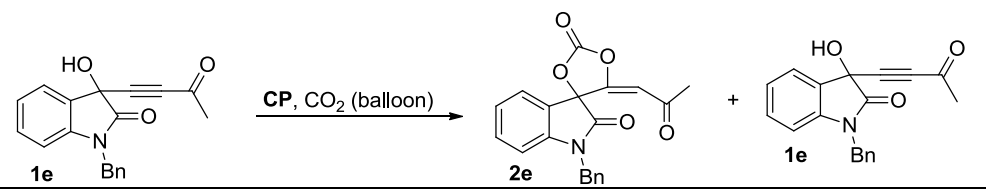

| entry <sup>[a]</sup> | cat  | solvent | temp (°C) | time (h) | conv. (%) | yield (%) <sup>[b]</sup> |    | ee (%) <sup>[c]</sup> |    |
|----------------------|------|---------|-----------|----------|-----------|--------------------------|----|-----------------------|----|
|                      |      |         |           |          |           | 2e                       | 1e | 2e                    | 1e |
| 1                    | CP5  | THF     | -40       | 12       | 31        | 29                       | 69 | 68                    | 20 |
| 2                    | CP14 | THF     | -40       | 12       | 44        | 41                       | 56 | 68                    | 40 |
| 3                    | CP15 | THF     | -40       | 12       | 65        | 60                       | 35 | 10                    | 5  |
| 4                    | CP16 | THF     | -40       | 12       | trace     | -                        | -  | -                     | -  |
| 5                    | CP17 | THF     | -40       | 12       | trace     | -                        | -  | -                     | -  |
| 6                    | CP18 | THF     | -40       | 12       | 59        | 49                       | 41 | 60                    | 50 |
| 7                    | CP19 | THF     | -40       | 12       | 59        | 51                       | 41 | 60                    | 72 |
| 8                    | CP20 | THF     | -40       | 12       | 67        | 62                       | 33 | 40                    | 72 |
| 9                    | CP21 | THF     | -40       | 12       | -         | -                        | -  | -                     | -  |

<sup>[a]</sup> The reaction was carried out using **1e** (0.1 mmol), **CP** (0.02 mmol), in the indicated solvent (0.5 mL) in a Schlenk tube at the indicated temperature. <sup>[b]</sup> Isolated yields. <sup>[c]</sup> The ee value was determined by HPLC analysis using a chiral stationary phase.

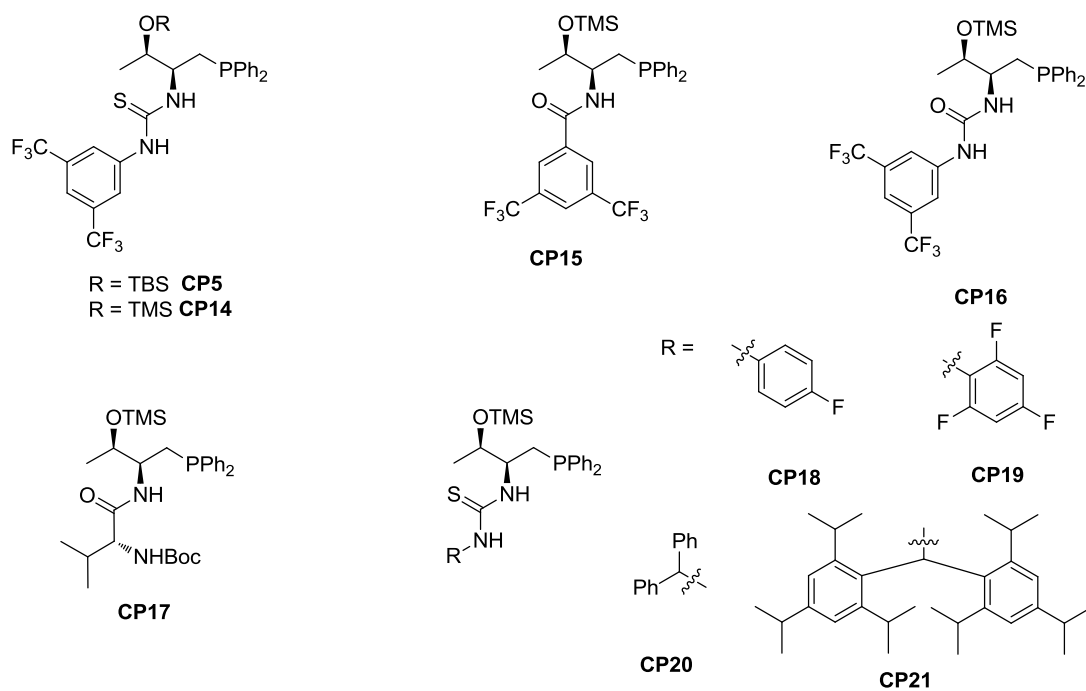

**Table S3.** Optimization of the reaction temperature with threonine derived chiral phosphine **N-CP6**

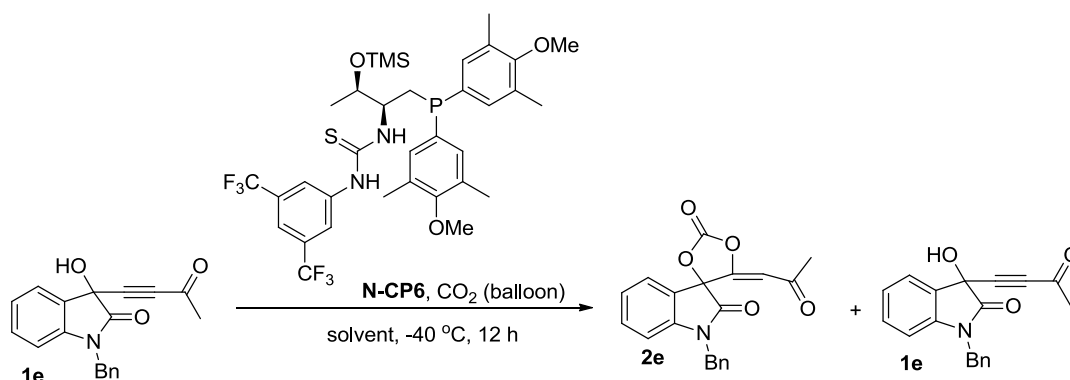

| entry <sup>[a]</sup> | <b>N-CP6</b> (X mol %) | solvent              | conv. (%) | yield (%) <sup>[b]</sup> |           | ee (%) <sup>[c]</sup> |           | s    |
|----------------------|------------------------|----------------------|-----------|--------------------------|-----------|-----------------------|-----------|------|
|                      |                        |                      |           | <b>2e</b>                | <b>1e</b> | <b>2e</b>             | <b>1e</b> |      |
| 1                    | 15 mol %               | (2.0 mL)             | 54        | 49                       | 46        | 81                    | 91        | 24.6 |
| 2                    | 10 mol %               | (2.0 mL)             | 53        | 46                       | 47        | 80                    | 88        | 23.2 |
| 3                    | 15 mol %               | (2.0 mL) +  (0.2 mL) | 62        | 57                       | 38        | 80                    | 93        | 11.7 |
| 4                    | 15 mol %               | (1.5 mL) +  (0.5 mL) | 64        | 51                       | 36        | 76                    | 96        | 12.2 |
| 5                    | 15 mol %               | (1.0 mL) +  (1.0 mL) | 58        | 47                       | 42        | 80                    | 87        | 12.0 |
| 6                    | 15 mol %               | (0.5 mL) +  (1.5 mL) | 59        | 42                       | 41        | 81                    | 82        | 8.9  |
| 7                    | 10 mol %               | (1.5 mL) +  (0.5 mL) | 49        | 41                       | 51        | 84                    | 70        | 13.0 |

<sup>[a]</sup> The reaction was carried out using **1e** (0.1 mmol), **N-CP6** (X mol %), in the indicated solvent (2.0 mL) in a Schlenk tube at the indicated temperature. <sup>[b]</sup> Isolated yields. <sup>[c]</sup> The ee value was determined by HPLC analysis using a chiral stationary phase.

**Table S4.** Other substrates for the kinetic resolution <sup>[a]</sup>

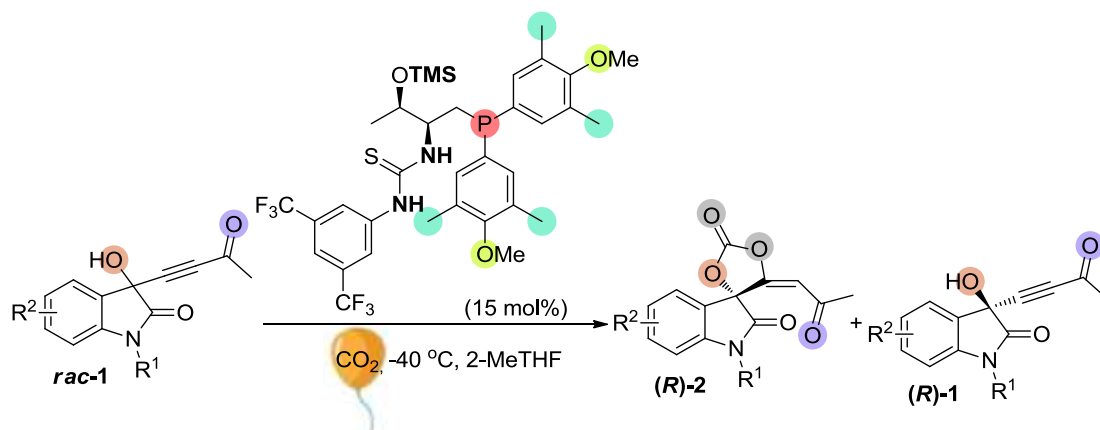

| entry <sup>[a]</sup> | starting materials               | time (h) | conv. (%) | yield (%) <sup>[b]</sup> |                | ee (%) <sup>[c]</sup> |                | s-factor <sup>[d]</sup> |
|----------------------|----------------------------------|----------|-----------|--------------------------|----------------|-----------------------|----------------|-------------------------|
|                      |                                  |          |           | ( <i>R</i> )-2           | ( <i>R</i> )-1 | ( <i>R</i> )-2        | ( <i>R</i> )-1 |                         |
| 1                    | X = 3,5-2Me, <b>1k</b>           | 12       | 48        | 37                       | 52             | 82                    | 56             | 7                       |
| 2                    | X = 2,6-2Cl, <b>1l</b>           | 16       | 37        | 26                       | 63             | 94                    | 28             | 3.7                     |
| 3                    | R <sup>2</sup> = 5-F, <b>1q</b>  | 12       | 32        | 22                       | 68             | 85                    | 23             | 3.9                     |
| 4                    | R <sup>2</sup> = 5-Br, <b>1s</b> | 12       | 41        | 32                       | 59             | 80                    | 47             | 8.2                     |

<sup>[a]</sup> The reaction was carried out using *rac*-1 (0.1 mmol), cat. (0.015 mmol) in the indicated solvent (2.0 mL) in a Schlenk tube at the indicated temperature. <sup>[b]</sup> Isolated yields. <sup>[c]</sup> The ee value was determined by HPLC analysis using a chiral stationary phase. <sup>[d]</sup> Selectivity (s-factor) calculated as  $s = \ln[(1-C)(1-ee_{SM})]/\ln[(1-C)(1+ee_{SM})]$ .

## 7. Isotope Labeling Experiments

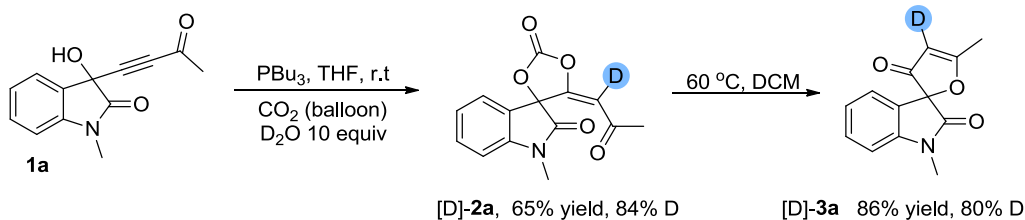

**Step 1:** A Schlenk tube was heated under vacuum to remove ambient moisture and water, then filled with argon. After the Schlenk tube was returned to room temperature,  $\gamma$ -hydroxy alkynone **1a** (0.3 mmol) was added. Then, the system was vacuumed and filled with  $\text{CO}_2$ . After repeating three times, THF (1.5 mL) with  $\text{D}_2\text{O}$  (60 mg, 2.0 mmol) was added and the reaction mixture was stirred for 10 minutes at room temperature. Then,  $\text{PBu}_3$  (0.06 mmol) was added to the reaction mixture at room temperature. After that, the resulting mixture was stirred at room temperature until the reaction completed upon monitoring by TLC. Then the solvent was removed under reduced pressure and the residue was directly subjected to a flash column chromatography on silica gel to afford the desired product **[D]-2a**.

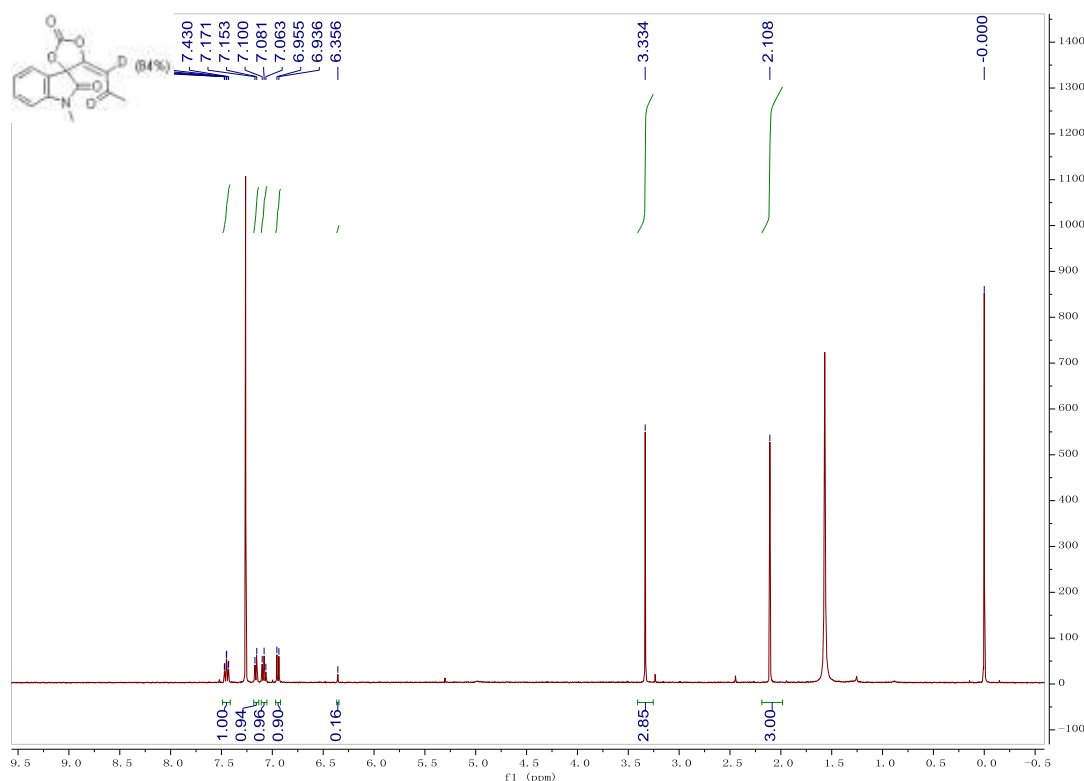

**Step 2:** A Schlenk tube was heated under vacuum to remove ambient moisture and water, then

filled with argon. After the Schlenk tube was returned to room temperature, cyclic carbonate [D]-2a (0.1 mmol) was added and dissolved in 0.5 mL DCM. After that, the resulting mixture was heated to 60 °C and was stirred at 60 °C until the reaction completed upon monitoring by TLC. Then the solvent was removed under reduced pressure and the residue was directly subjected to a flash column chromatography on silica gel to afford the desired product [D]-3.

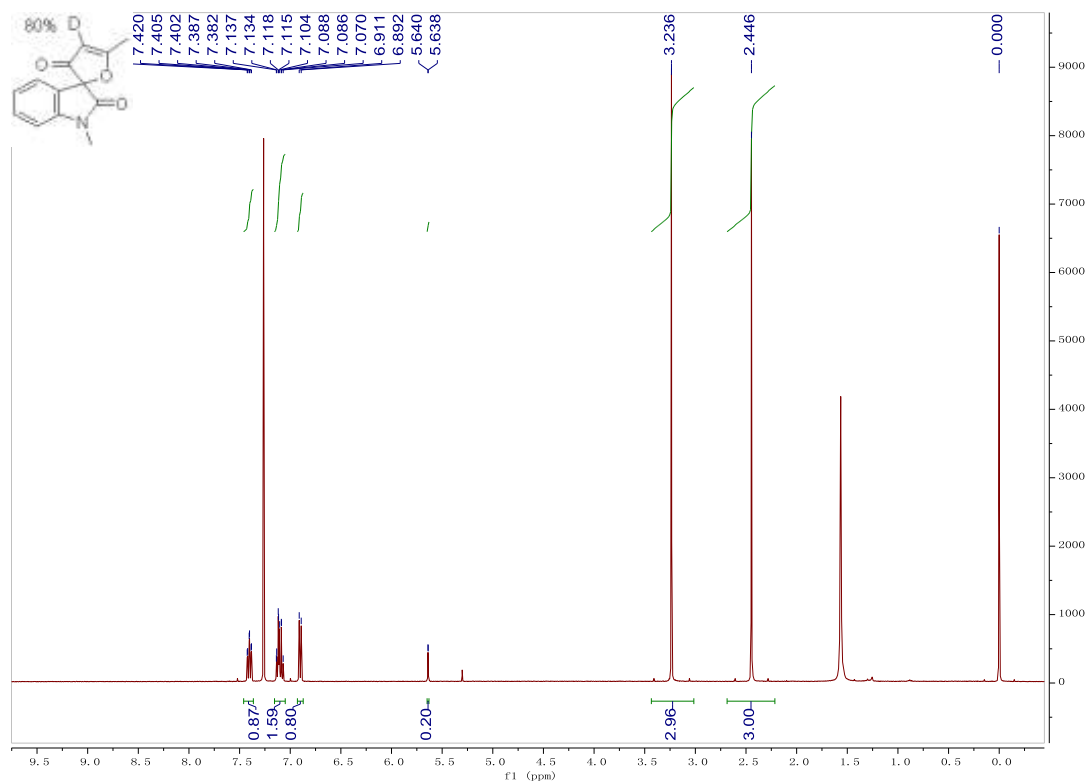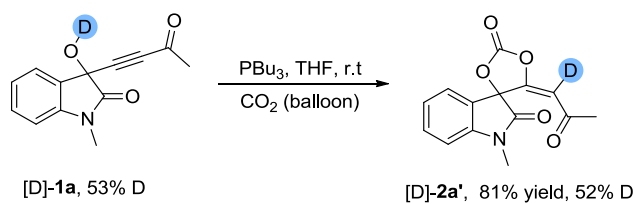

A Schlenk tube was heated under vacuum to remove ambient moisture and water, then filled with argon. After the Schlenk tube was returned to room temperature,  $\gamma$ -Hydroxyl Alkynone [D]-1a (0.3 mmol) was added. Then vacuuming the system and filled with CO<sub>2</sub>. After repeating three times, THF (1.5 mL) was added and the reaction mixture stirred for 10 minutes at room temperature. Then, PBu<sub>3</sub> (0.06 mmol) was added to the reaction mixture at room temperature. After that, the resulting mixture was stirred at room temperature until the reaction completed upon monitoring by TLC. Then the solvent was removed under reduced pressure and the residue was directly subjected to a flash column chromatography on silica gel to afford the desired product [D]-2a'.



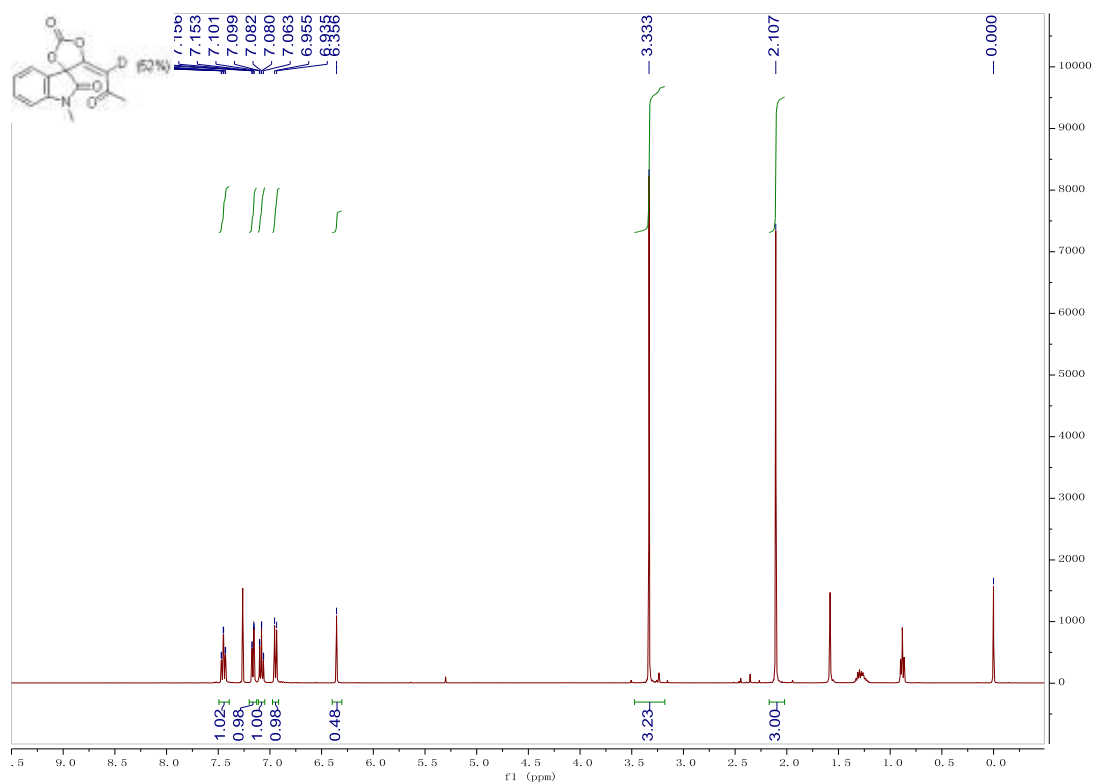

Synthesis of [D]-**1a**: Under argon atmosphere, to a solution of **1a** (300 mg) in CDCl<sub>3</sub> (10 mL) was added D<sub>2</sub>O (5 mL) at room temperature. The resulting mixture was stirred at room temperature for two days. Then the solvent was removed under reduced pressure. The crude product was used for the next reaction without further purification.

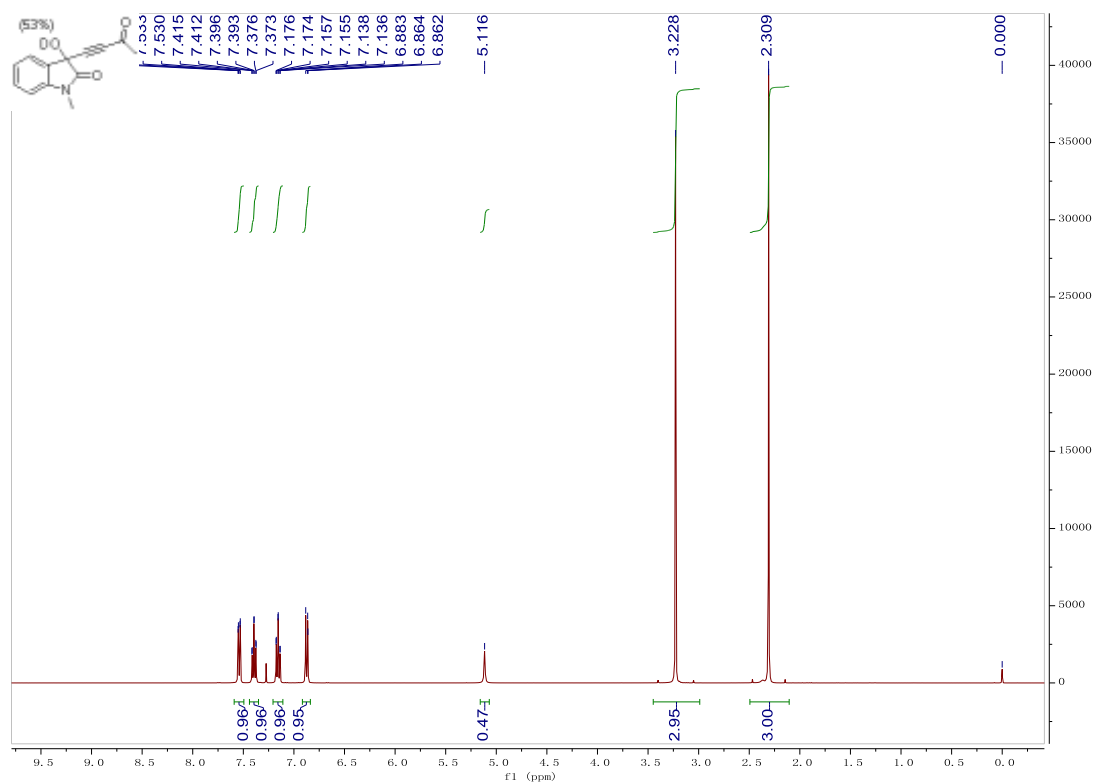

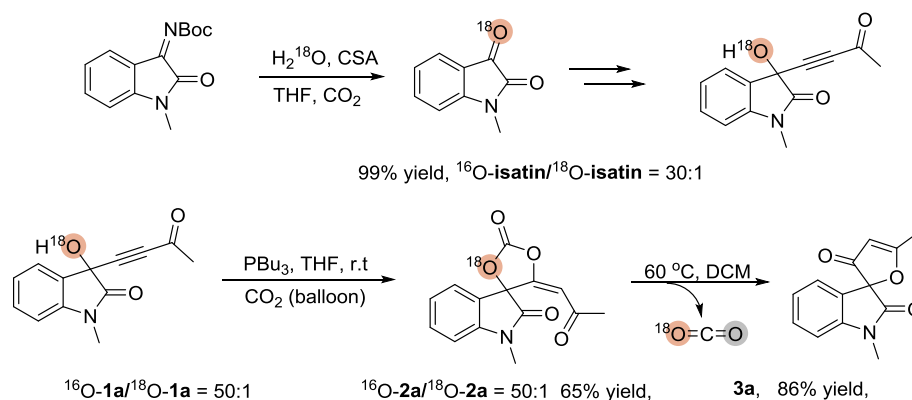

In a Schlenk tube, tert-butyl (*E*)-(1-methyl-2-oxoindolin-3-ylidene)carbamate (1.0 mmol) was dissolved in THF (10 mL), then added into the  $\text{H}_2^{18}\text{O}$  (5.0 mmol) dropwise. The mixture was stirred under argon atmosphere at room temperature for 5 min. Then CSA (0.1 mmol) was added into the reaction mixture and heated to reflux. After 1 hour, the mixture was cooled to room temperature and the organic layer was concentrated to afford  $^{18}\text{O}$ -isatin as a red solid in 99% yield. The  $^{16}\text{O}/^{18}\text{O}$  ratio of isatin is 30/1 according to the MS report shown as below:

$^{16}\text{O}$ -isatin:

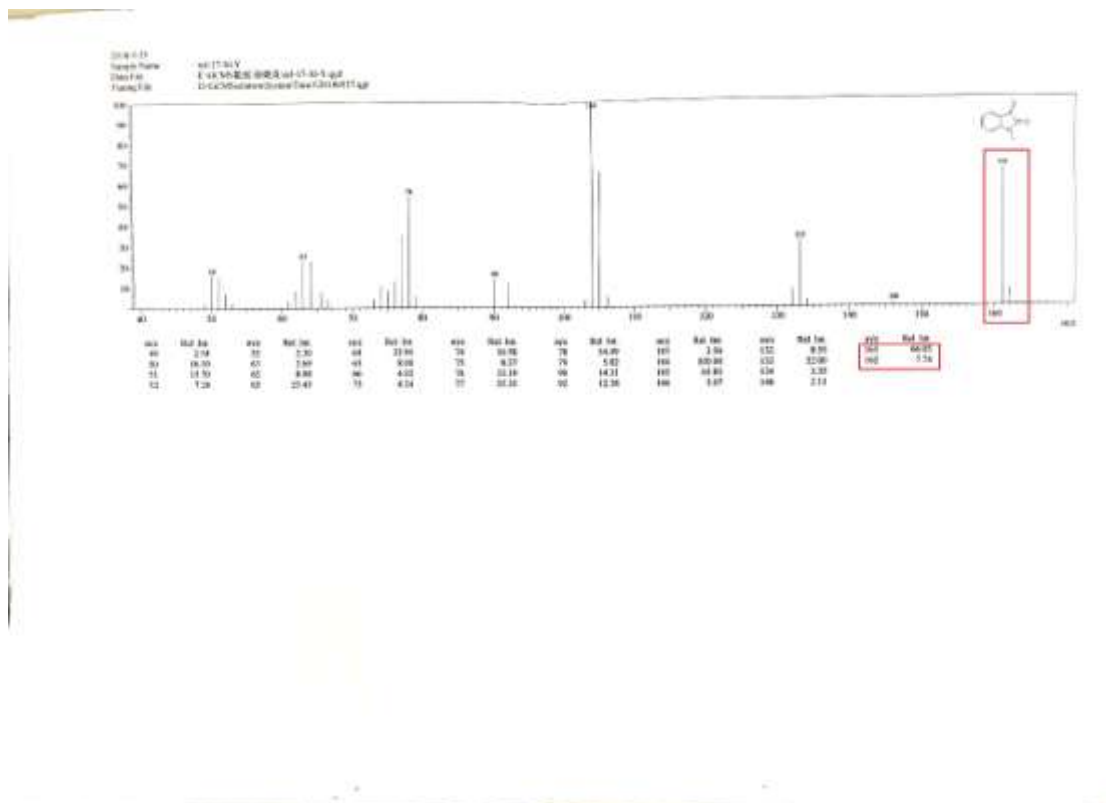

<sup>18</sup>O-isatin:

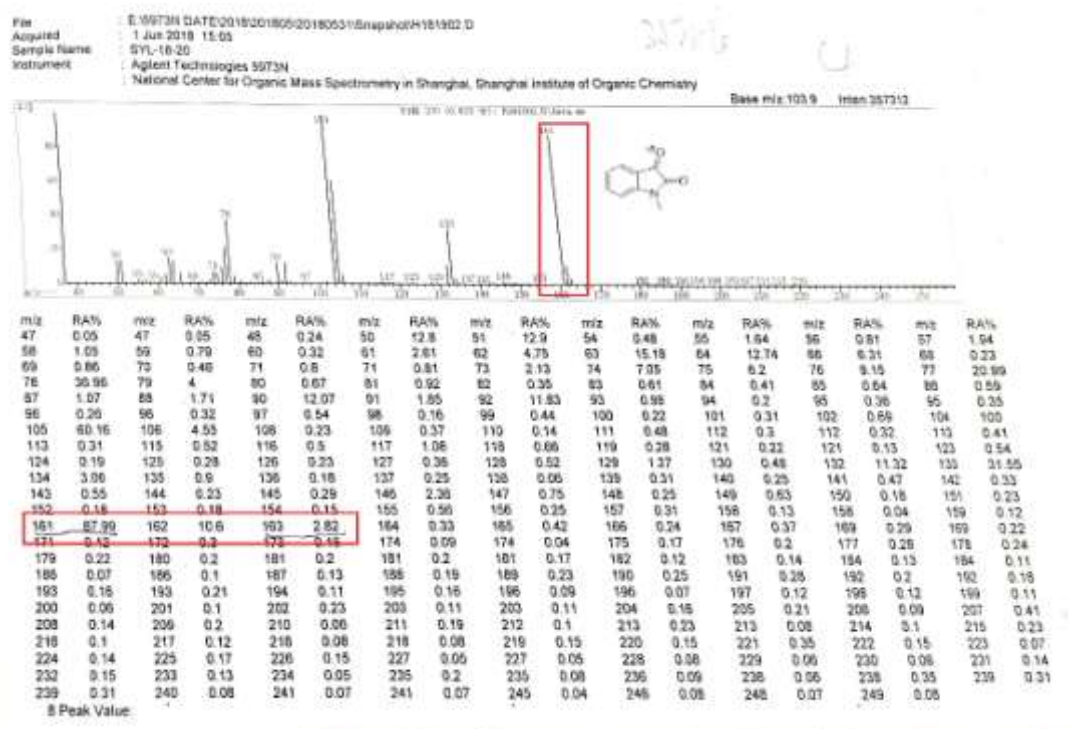

<sup>16</sup>O-1a/<sup>18</sup>O-1a = 50:1

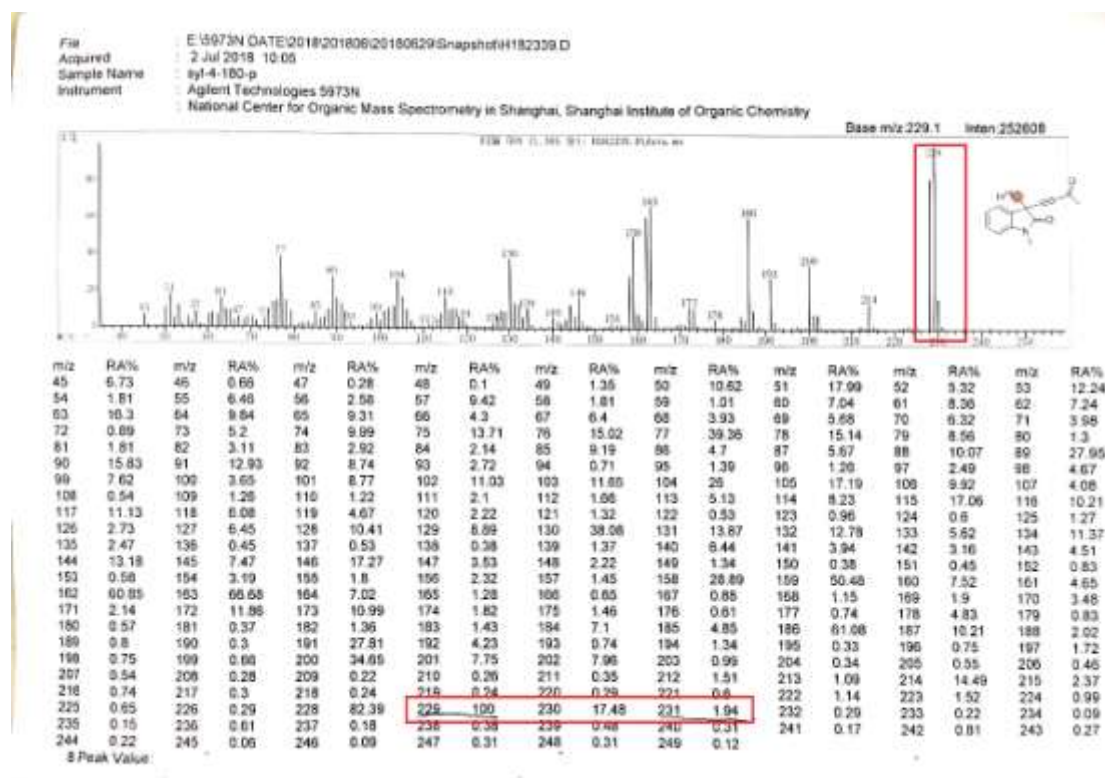

<sup>16</sup>O-2a:

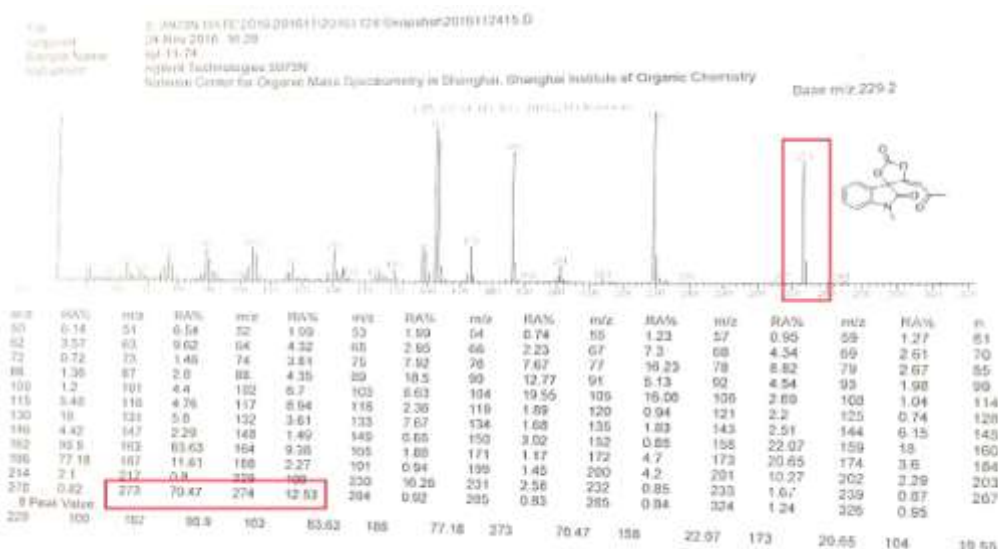

$^{16}\text{O-2a}/^{18}\text{O-2a} = 50:1$

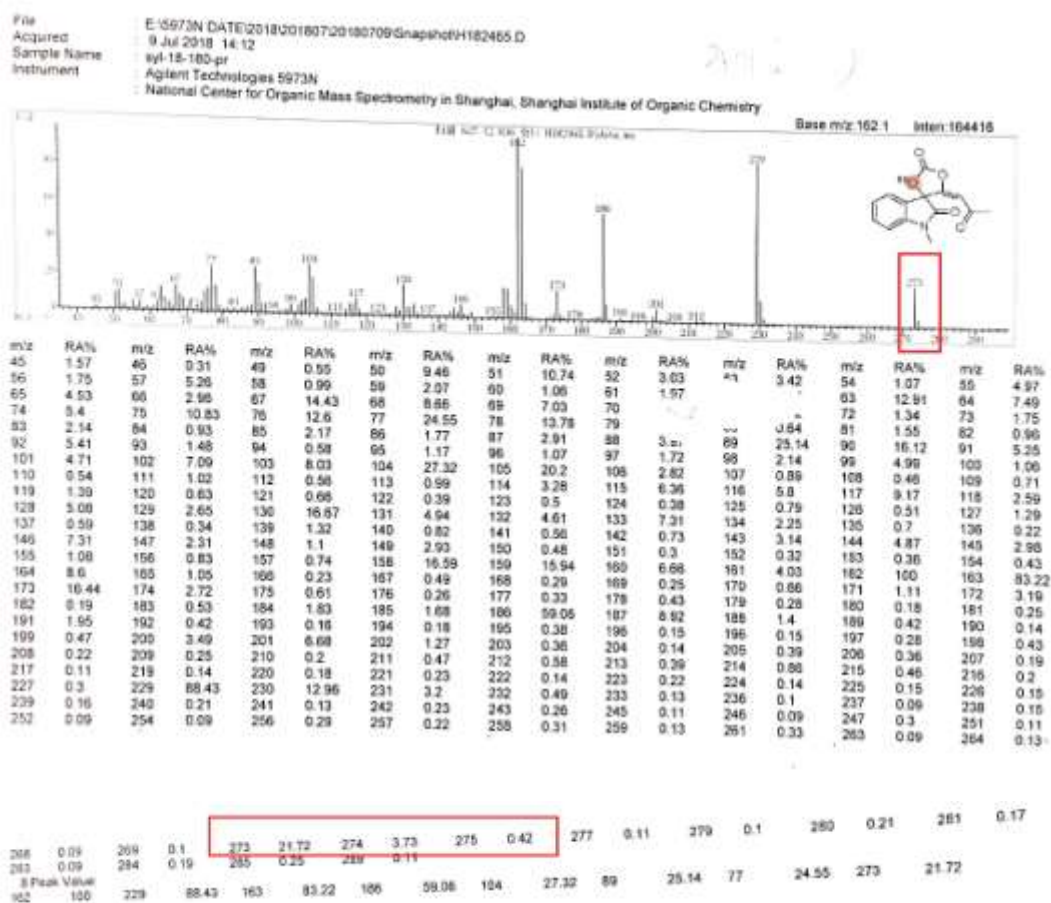

3a was converted from 2a:

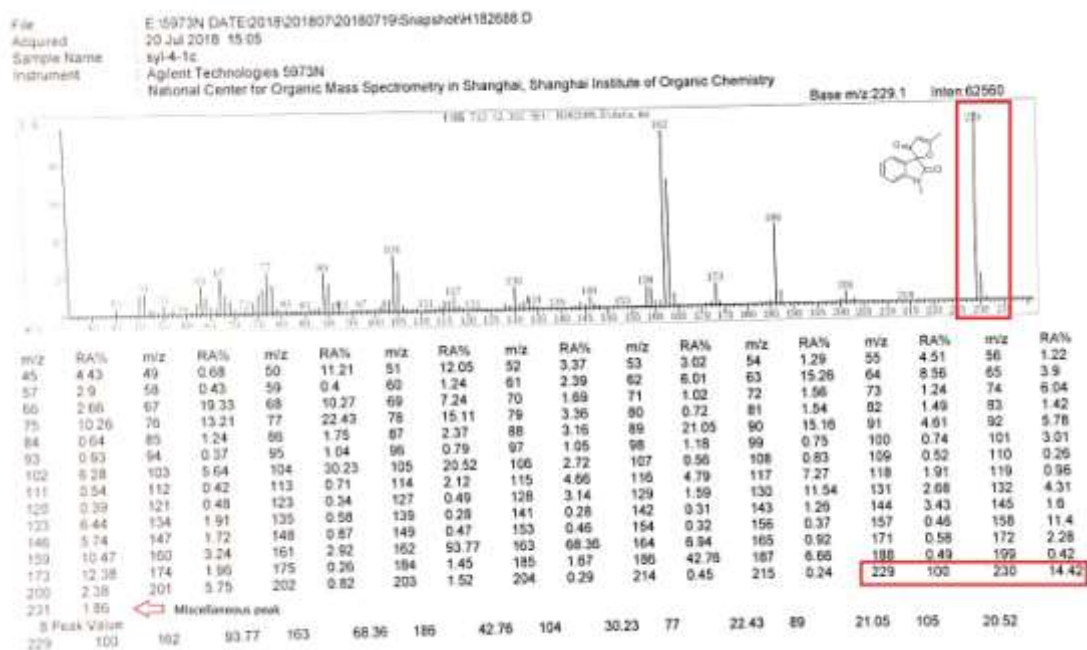

3a was converted from  $^{16}\text{O}$ -2a/ $^{18}\text{O}$ -2a:

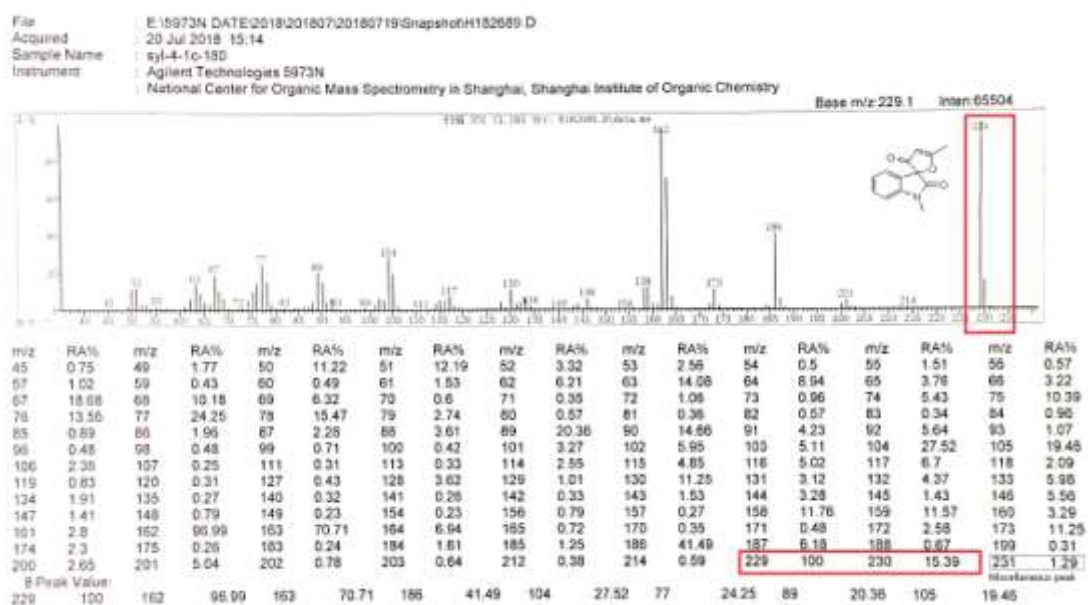

## 8. Computational Details

The total energies, enthalpies and free energies of the lowest conformers of all species shown in Scheme 3a and 3c (Table S5)

Table S5.<sup>a</sup>

|                        | $E_{\text{tot}} (E_{\text{h}})$ | $H_{298,\text{THF}}$ | $G_{298,\text{THF}}$ |
|------------------------|---------------------------------|----------------------|----------------------|
| <b>1a</b>              | -782.0848623                    | -781.8547246         | -781.9180546         |
| <b>PBu<sub>3</sub></b> | -814.6382214                    | -814.2494482         | -814.3182312         |
| <b>INT1</b>            | -1596.755835                    | -1596.133858         | -1596.237701         |
| <b>TS1</b>             | -1596.741613                    | -1596.125061         | -1596.227886         |
| <b>INT2</b>            | -1596.759752                    | -1596.137422         | -1596.240483         |
| <b>CO<sub>2</sub></b>  | -188.560743                     | -188.5451942         | -188.5694532         |
| <b>INT3</b>            | -1785.338296                    | -1784.698178         | -1784.808336         |
| <b>TS2</b>             | -1785.323461                    | -1784.684355         | -1784.792590         |
| <b>INT4</b>            | -1785.330827                    | -1784.689680         | -1784.794910         |
| <b>TS3</b>             | -1785.313888                    | -1784.674867         | -1784.778770         |
| <b>INT5</b>            | -1785.333482                    | -1784.694735         | -1784.802603         |
| <b>2a</b>              | -970.718415                     | -970.470013          | -970.533946          |
| <b>(S)-TS3</b>         | -4254.794939                    | -4253.766433         | -4253.935851         |
| <b>(R)-TS3</b>         | -4254.786325                    | -4253.75899          | -4253.933787         |

a. SMD/M06/6-311+G(d,p)//M06/6-31G(d) (THF as solvent)

The total energies, enthalpies and free energies of the lowest conformers of all species shown in Scheme 3b (Table S6)

Table S6.<sup>a</sup>

|             | $E_{\text{tot}} (E_{\text{h}})$ | $H_{298,\text{DCM}}$ | $G_{298,\text{DCM}}$ |
|-------------|---------------------------------|----------------------|----------------------|
| <b>2a</b>   | -970.6841295                    | -970.4357281         | -970.499661          |
| <b>TS4</b>  | -970.6455038                    | -970.3999605         | -970.464657          |
| <b>INT6</b> | -970.717971                     | -970.4700303         | -970.536811          |
| <b>3a</b>   | -782.1518763                    | -781.9208941         | -781.977722          |

|                 |              |              |             |
|-----------------|--------------|--------------|-------------|
| CO <sub>2</sub> | -188.5587642 | -188.5432528 | -188.567500 |
|-----------------|--------------|--------------|-------------|

b. SMD/M06/6-311+G(d,p)/M06/6-31G(d) (DCM as solvent)

Archive entries

**1a**

```
1\1\GINC-OM103\SP\RM06\6-311+G(d,p)\C13H11N1O3\WEIY\16-Oct-2018\0\#\p
m06/6-311+g(d,p) geom=check scrf=(iefpcm,smd,solvent=THF)\Title Card
Required\0,1\C,0,0.0027189706,0.0028142566,0.1115238163\C,0,-0.043731
3101,0.0847216414,1.3181057111\O,0,1.1333823756,-0.0369337632,3.316938
4666\H,0,1.0771720361,0.126001727,4.2706439057\C,0,-0.1363394189,0.215
3905252,2.7670460796\C,0,-0.7359580664,1.5474510588,3.149645684\C,0,-1
.2077653414,-0.7901300054,3.3066178875\C,0,-1.9658381958,1.3306656167,
3.7736966256\C,0,-0.2406693397,2.8244197669,2.981147582\C,0,-2.7332244
376,2.3848110349,4.2407976535\C,0,-0.9983156607,3.9002158991,3.4507735
179\H,0,0.7208808406,2.9756381247,2.4915145354\C,0,-2.2260115535,3.675
3054025,4.0669810396\H,0,-3.69316478,2.2189128213,4.7262926506\H,0,-0.
6302832717,4.9168789349,3.3321691961\H,0,-2.8082871916,4.5224350842,4.
4252655018\N,0,-2.2366366237,-0.0407670697,3.8439572721\C,0,-3.3971615
597,-0.6239905747,4.4668098337\H,0,-3.4609549746,-0.3364346636,5.52483
67705\H,0,-4.3157261341,-0.307492207,3.9558042947\H,0,-3.2974186232,-1
.7107353204,4.3927834091\O,0,-1.1377980214,-1.9940514078,3.2815893958\
C,0,0.0469586206,-0.1150849292,-1.337491356\O,0,1.046545709,0.15960841
73,-1.9671730594\C,0,-1.227157449,-0.6005928679,-1.9708701025\H,0,-2.0
608583357,0.0639726097,-1.7091729265\H,0,-1.1057898049,-0.6390061756,-
3.0571815238\H,0,-1.4820461104,-1.5970915511,-1.5871033902\Version=ES
64L-G16RevA.03\State=1-A\HF=-782.0848623\RMSD=4.116e-09\Dipole=-2.7012
489,1.4218629,1.8180301\Quadrupole=-0.535851,-1.4666595,2.0025105,3.70
79077,6.5754582,4.6217188\PG=C01 [X(C13H11N1O3)]\@
```

**PBu<sub>3</sub>**

```
1\1\GINC-OM103\SP\RM06\6-311+G(d,p)\C12H27P1\WEIY\16-Oct-2018\0\#\p
m06/6-311+g(d,p) geom=check scrf=(iefpcm,smd,solvent=THF)\Title Card Re
quired\0,1\P,0,-0.1515895773,-0.0936034658,-0.0607160783\C,0,-0.03327
23003,-0.133733992,1.812438957\C,0,1.310297633,0.0687890812,2.50244325
2\H,0,-0.4483133187,-1.1033138262,2.1283830183\H,0,-0.755713205,0.6188
836837,2.1718350709\C,0,1.1854891342,0.0535094873,4.020601734\H,0,2.01
3331591,-0.7224045259,2.1942528747\H,0,1.7737994614,1.0179857149,2.189
6277116\C,0,2.5252166733,0.2205257081,4.717481358\H,0,0.4956419275,0.8
53787919,4.3343910439\H,0,0.7121243327,-0.8904353073,4.3358063301\H,0,
2.4242232762,0.211616472,5.8096397697\H,0,3.2171492337,-0.5869044511,4
.4405536404\H,0,3.0014115395,1.1696908127,4.4349283653\C,0,1.608148798
4,-0.4373693254,-0.5738209519\C,0,1.8052957231,-0.2808747882,-2.076202
0595\H,0,1.8213138471,-1.4790657734,-0.2833555282\H,0,2.3336534341,0.1
```

895139782,-0.0323129391\C,0,3.1854031425,-0.724078967,-2.5420361863\H,  
0,1.0333142604,-0.8547269035,-2.6164644561\H,0,1.6525666795,0.77311175  
44,-2.3662711726\C,0,3.3808731199,-0.5456226673,-4.0380503817\H,0,3.95  
29171175,-0.1563124709,-1.9914772709\H,0,3.3369872369,-1.7799734312,-2  
.2658909144\H,0,4.3762410653,-0.8711199991,-4.364127236\H,0,2.63860654  
94,-1.125139957,-4.604154921\H,0,3.2632373852,0.507616285,-4.328503433  
3\C,0,-0.281237394,1.7408950133,-0.3935399381\C,0,0.7532980406,2.70302  
69172,0.1720159637\H,0,-1.2859350156,2.0317780768,-0.0452726746\H,0,-0  
.3221978651,1.8428506157,-1.4906529813\C,0,0.5351525056,4.135499704,-0  
.299107601\H,0,0.7245916543,2.681019903,1.274167793\H,0,1.771235391,2.  
3850217864,-0.1115830755\C,0,1.5549709535,5.1021146078,0.278540746\H,0  
,0.5727341173,4.1620301829,-1.4002009378\H,0,-0.4836263281,4.455022608  
3,-0.026274936\H,0,1.3911887506,6.1291711023,-0.069893499\H,0,1.511334  
5084,5.1122590458,1.3764736312\H,0,2.5766344232,4.8133705266,-0.004987  
6015\\Version=ES64L-G16RevA.03\State=1-A\HF=-814.6382214\RMSD=7.215e-0  
9\Dipole=0.5358304,0.4275022,0.3331008\Quadrupole=-2.1061088,0.8149383  
,1.2911705,-3.2736664,-2.4126556,-1.2699208\PG=C01 [X(C12H27P1)]\@

#### INT1

1\1\GINC-OM103\SP\RM06\6-311+G(d,p)\C25H38N1O3P1\WEIY\16-Oct-2018\0\#\#  
p m06/6-311+g(d,p) geom=check scrf=(iefpcm,smd,solvent=THF)\Title Car  
d Required\0,1\C,0,-0.0166006308,0.8735893437,0.3786326161\C,0,-0.010  
6253031,0.5063361786,1.6522373654\p,0,1.6430346752,0.2246046881,2.3592  
225402\C,0,2.4214420697,-1.1486178418,1.4244340581\C,0,3.8497778038,-0  
.9253875816,0.9413483699\H,0,1.7644077287,-1.3255560863,0.5609369595\H  
,0,2.346712508,-2.0458424434,2.0593685076\C,0,4.3630595721,-2.11677612  
12,0.1443076662\H,0,3.8883833508,-0.023595642,0.3089674827\H,0,4.52694  
23566,-0.7344675148,1.7906859198\C,0,5.7793375008,-1.9056960198,-0.362  
2158194\H,0,4.3152531528,-3.0223527712,0.7703404933\H,0,3.6820289657,-  
2.2989448234,-0.7028054012\H,0,6.1387800603,-2.7671379835,-0.937467169  
5\H,0,5.8372295351,-1.0225729859,-1.0127089232\H,0,6.4778703229,-1.746  
5718446,0.4708254156\C,0,2.5728976842,1.7596528587,2.0487382838\C,0,1.  
9350995959,2.9814803934,2.7039295868\H,0,2.5727705827,1.9118356351,0.9  
57573121\H,0,3.6148138774,1.6264492944,2.3768253206\C,0,2.5066061977,4  
.2678451669,2.1245311608\H,0,0.8469786666,2.9638952349,2.5306965044\H,  
0,2.0761219817,2.9571582662,3.7983348503\C,0,1.9083068616,5.506135657,  
2.7684224751\H,0,3.6024955855,4.2719936806,2.2441109174\H,0,2.31241240  
56,4.2632247027,1.0411862509\H,0,2.3135645551,6.4278229215,2.333580958  
1\H,0,0.8178146486,5.5282747589,2.6361860959\H,0,2.1085666844,5.530902  
3481,3.8490186284\C,0,1.8203069884,-0.1737872079,4.1382038531\C,0,3.25  
52432242,-0.4150961711,4.5912071535\H,0,1.1810323407,-1.0502711333,4.3  
171542456\H,0,1.3638126358,0.6571144781,4.6925029422\C,0,3.3314632206,  
-0.7393081145,6.0779211802\H,0,3.7057760153,-1.2447971538,4.0206483812  
\H,0,3.8788924362,0.4716859321,4.3860624253\C,0,4.7564434789,-0.980703  
94,6.5451930201\H,0,2.8810576388,0.0875839785,6.6493620469\H,0,2.70914



43366,-1.6237886367,6.2852552866\H,0,4.8006419528,-1.212014377,7.61609  
24701\H,0,5.2129101467,-1.8211642732,6.0044201288\H,0,5.3853694372,-0.  
0971381571,6.3694185625\O,0,-0.926296705,0.988634994,3.7792211576\H,0,  
-1.7227590794,0.9575262881,4.3295540654\C,0,-1.2157183992,0.3392530878  
,2.5486926591\C,0,-2.5057731487,0.7816580293,1.9296682677\C,0,-1.45628  
17864,-1.1767242281,2.757960068\C,0,-3.3523264597,-0.3189821353,1.7994  
512761\C,0,-2.9176251298,2.0346521346,1.5262956205\C,0,-4.6247631967,-  
0.2033173854,1.2672976132\C,0,-4.2010420326,2.1772143988,0.9922653419\  
H,0,-2.2399301879,2.8829582044,1.6167759469\C,0,-5.0356558112,1.070931  
5647,0.8656569334\H,0,-5.2817333752,-1.065184737,1.1630139712\H,0,-4.5  
469129232,3.1550920581,0.6639359694\H,0,-6.0311387189,1.1954964084,0.4  
427004852\N,0,-2.711740573,-1.4730966,2.2836985414\C,0,-3.2691979171,-  
2.7995367528,2.2600419294\H,0,-4.1915454986,-2.8490673809,2.854293689\  
H,0,-3.4938928899,-3.1104221319,1.231091156\H,0,-2.5255917354,-3.47714  
45267,2.6895580702\O,0,-0.6684599539,-1.9783767516,3.2279556172\C,0,0.  
8646021262,1.1242176269,-0.6783469271\O,0,1.4872391131,2.1893456394,-0  
.8623639013\C,0,0.9478659207,0.0214867474,-1.7231149822\H,0,0.53413891  
38,0.3877029313,-2.6712694628\H,0,2.0049622999,-0.2190659746,-1.905028  
1028\H,0,0.4030924729,-0.8884409394,-1.4367119365\\Version=ES64L-G16Re  
vA.03\State=1-A\HF=-1596.755835\RMSD=5.267e-09\Dipole=-0.153063,-2.138  
4375,2.4294373\Quadrupole=19.4837412,-6.2275674,-13.2561738,1.7422246,  
4.0911667,12.3218167\PG=C01 [X(C25H38N1O3P1)]\@

## TS1

1\1\GINC-OM112\SP\RM06\6-311+G(d,p)\C25H38N1O3P1\WEIY\27-Oct-2018\0\#\#  
p m06/6-311+g(d,p) geom=check scrf=(iefpcm,smd,solvent=THF)\Title Car  
d Required\0,1\C\C,1,1.33356284\P,2,1.77367829,1,124.00779974\C,3,1.8  
3037818,2,109.25839038,1,-69.95208455,0\C,4,1.52517864,3,116.68973431,  
2,153.09897285,0\H,4,1.10093819,3,105.71102389,2,30.37417,0\H,4,1.1026  
9946,3,106.20775652,2,-81.90928149,0\C,5,1.52289768,4,111.62786337,3,1  
77.71365541,0\H,5,1.10145156,4,109.62902622,3,-61.06146161,0\H,5,1.101  
98565,4,110.84740443,3,55.65938564,0\C,8,1.51885403,5,112.26634902,4,1  
78.8422055,0\H,8,1.10151847,5,109.19705234,4,-58.74783405,0\H,8,1.1014  
4667,5,109.0845821,4,56.57969053,0\H,11,1.09609799,8,111.69593852,5,17  
9.93800833,0\H,11,1.0983181,8,111.10082835,5,-59.85829311,0\H,11,1.098  
56606,8,111.13479587,5,59.72397804,0\C,3,1.81671302,2,110.19277216,1,5  
0.45274252,0\C,17,1.52755133,3,112.46060252,2,57.62928806,0\H,17,1.100  
41738,3,106.06244388,2,-61.70053706,0\H,17,1.10083729,3,108.93217345,2  
, -178.03101948,0\C,18,1.52194945,17,111.08135055,3,-168.61146589,0\H,1  
8,1.1010148,17,109.92130158,3,-47.18918902,0\H,18,1.10338962,17,110.30  
440889,3,69.30208031,0\C,21,1.51872842,18,111.97835294,17,-178.0108766  
2,0\H,21,1.10279833,18,109.67623366,17,-55.45744625,0\H,21,1.10064063,  
18,108.29268742,17,60.22458892,0\H,24,1.09660416,21,111.70832713,18,-1  
78.71851411,0\H,24,1.09773267,21,110.83822443,18,-58.42136656,0\H,24,1  
.09881258,21,111.19685994,18,60.88815778,0\C,3,1.82366967,2,110.754523

98,1,170.44455038,0\C,30,1.52366399,3,116.39915611,2,179.64977737,0\H,  
30,1.10167067,3,106.69346499,2,56.26351641,0\H,30,1.10212737,3,106.210  
94655,2,-57.14181579,0\C,31,1.52377488,30,110.86969392,3,176.29517723,  
0\H,31,1.10238735,30,110.19034949,3,-62.86911879,0\H,31,1.10289151,30,  
110.89344879,3,54.72926702,0\C,34,1.51851851,31,112.47814478,30,177.44  
354776,0\H,34,1.10172337,31,108.89290964,30,-60.24268677,0\H,34,1.1024  
069,31,108.92590899,30,54.87520378,0\H,37,1.09609654,34,111.70446504,3  
1,179.47556932,0\H,37,1.0985284,34,111.13751891,31,-60.31876757,0\H,37  
,1.09852938,34,111.10489554,31,59.30580644,0\C,2,1.58412779,1,109.3518  
2622,3,179.12911284,0\C,43,1.51578228,2,110.8585413,1,125.61308913,0\C  
,43,1.55008856,2,109.20158545,1,-123.38622432,0\C,44,1.39778883,43,109  
.37178269,2,121.40361051,0\C,44,1.37882813,43,130.51496092,2,-58.35997  
77,0\C,46,1.38614609,44,121.86118766,43,-178.5754318,0\C,47,1.40030664  
,44,119.11388876,43,178.9146795,0\H,47,1.09171715,44,119.49437196,43,-  
1.00540029,0\C,49,1.39094001,47,120.15876338,44,0.16705878,0\H,48,1.08  
932905,46,121.56297086,44,179.46447828,0\H,49,1.08867894,47,120.080938  
01,44,179.93729159,0\H,51,1.08898207,49,119.64017662,47,-179.95381685,  
0\N,45,1.39112567,43,107.69409777,2,-124.62308917,0\C,55,1.43569407,45  
,123.34343577,43,176.18924506,0\H,56,1.09796552,55,111.39506714,45,127  
.84366349,0\H,56,1.10293162,55,110.86187766,45,-111.1994487,0\H,56,1.0  
9465,55,107.36958569,45,8.16530743,0\O,45,1.21384172,43,128.02102704,2  
,53.69780762,0\C,1,1.4500412,2,133.62122699,43,-178.26230921,0\O,61,1.  
22742563,1,124.21137377,2,-67.6049343,0\C,61,1.51132298,1,114.57517829  
,2,116.85123961,0\H,63,1.09825144,61,109.05797677,1,78.37584976,0\H,63  
,1.09479826,61,109.86794661,1,-162.68692353,0\H,63,1.09838471,61,111.8  
7000796,1,-39.31076327,0\H,1,1.27746064,2,95.06542706,43,0.39050483,0\  
O,43,1.33722618,2,106.80554594,1,-1.26554782,0\\Version=ES64L-G16RevA.  
03\State=1-A\HF=-1596.741613\RMSD=5.397e-09\Dipole=3.7970498,-2.180075  
3,3.5422943\Quadrupole=-8.6404154,3.8541741,4.7862413,0.3424318,-11.31  
5135,11.3558758\PG=C01 [X(C25H38N1O3P1)]\@

## INT2

1\1\GINC-OM103\SP\RM06\6-311+G(d,p)\C25H38N1O3P1\WEIY\25-Oct-2018\0\#\#  
p m06/6-311+g(d,p) geom=check scrf=(iefpcm,smd,solvent=THF)\Title Car  
d Required\0,1\C,0,0.1203375283,-0.0186449536,0.0479997017\C,0,0.1408  
724797,-0.0524206194,1.3888413123\p,0,1.5323476353,-0.1739267266,2.635  
1266602\C,0,2.3041023711,-1.7784597472,2.0208941174\C,0,3.8208201528,-  
1.9012731343,1.9433107226\H,0,1.8950166883,-1.9978578649,1.0285939175\  
H,0,1.895956722,-2.5590158478,2.6859431753\C,0,4.2682236964,-3.3377675  
356,1.707829825\H,0,4.1863036283,-1.2680783624,1.1201654763\H,0,4.3058  
53223,-1.5282143193,2.8601409979\C,0,5.7754269293,-3.4627185137,1.5644  
998469\H,0,3.9157554338,-3.9675245997,2.5419896165\H,0,3.76982092,-3.7  
270548359,0.8055370096\H,0,6.0881198935,-4.501279046,1.4003082172\H,0,  
6.1406208424,-2.8661943179,0.7172704646\H,0,6.2887273348,-3.0992666106  
,2.4657597665\C,0,2.7864538497,1.1366675935,2.3516726059\C,0,2.8788254

305,2.1849061932,3.452684373\H,0,2.5122451361,1.6075873518,1.396706247  
6\H,0,3.7614850992,0.6587668036,2.1849186061\C,0,3.8803861848,3.277609  
3656,3.1034331557\H,0,1.8855941282,2.622773488,3.6238820949\H,0,3.1789  
34561,1.7143949489,4.4046465578\C,0,3.9932371416,4.3261607752,4.196987  
3107\H,0,4.8674238581,2.8263293242,2.9115597788\H,0,3.5791480348,3.753  
6011546,2.1563315187\H,0,4.709739604,5.1147556736,3.9364600865\H,0,3.0  
22212107,4.8042807015,4.3846694039\H,0,4.3234868638,3.8753741394,5.14  
31197791\C,0,1.4651473403,-0.6130335654,4.4326444534\C,0,2.6936892178,  
-1.2704811799,5.0475276348\H,0,0.5721179193,-1.2460714965,4.5455845428  
\H,0,1.2296084309,0.3240800854,4.9504949861\C,0,2.5308674504,-1.420910  
0831,6.5558158084\H,0,2.883047045,-2.2636073996,4.6104981308\H,0,3.599  
5888451,-0.6715408655,4.8487822074\C,0,3.7324000494,-2.0861905179,7.20  
48552933\H,0,2.3634569518,-0.4273485826,7.0014394731\H,0,1.6179193633,  
-2.0010754686,6.7632975265\H,0,3.6083482288,-2.1850480404,8.2901137224  
\H,0,3.896082095,-3.0925548955,6.7952771529\H,0,4.6491068801,-1.507146  
5828,7.0260078677\O,0,0.1205563671,1.1555250119,3.1528777667\C,0,-0.83  
89897543,0.6298429298,2.3118931743\C,0,-1.7913517151,1.6170131165,1.70  
05710123\C,0,-1.8068576229,-0.3910440861,2.961401309\C,0,-3.1021724549  
,1.2034296495,1.9449752706\C,0,-1.5456683781,2.7934579508,1.024161399\  
C,0,-4.192113189,1.9357679154,1.5047751565\C,0,-2.6302230608,3.5505832  
689,0.5713500248\H,0,-0.5168086743,3.1160180908,0.8596016663\C,0,-3.93  
20111799,3.1200517957,0.8091312738\H,0,-5.2130233182,1.609521594,1.696  
6390934\H,0,-2.4580753656,4.4821251403,0.0357499887\H,0,-4.7691407908,  
3.7176039063,0.451807227\N,0,-3.0956634218,0.0081920005,2.6788839796\C  
,0,-4.2687272993,-0.6930348371,3.128107846\H,0,-4.8782192465,-0.058717  
353,3.7860295042\H,0,-4.8843166413,-1.0157285318,2.2776577092\H,0,-3.9  
315320422,-1.5723744129,3.6848468173\O,0,-1.4988447738,-1.3912684244,3  
.580147975\C,0,1.2472186308,-0.2873356657,-0.8654506056\O,0,2.41221639  
62,-0.2682652567,-0.5020095623\C,0,0.8712289883,-0.5510038888,-2.30010  
5889\H,0,0.3494112729,0.3190393566,-2.7218309012\H,0,1.767573435,-0.75  
94959582,-2.890150406\H,0,0.1749063692,-1.3977939322,-2.3676730815\H,0  
, -0.8194507706,0.2831578635,-0.4270474516\\Version=ES64L-G16RevA.03\St  
ate=1-A\HF=-1596.7597516\RMSD=2.810e-09\Dipole=-0.9002205,-0.0323053,-  
1.1509785\Quadrupole=8.9039117,-8.5276888,-0.3762229,-0.4661759,9.8182  
996,-2.416854\PG=C01 [X(C25H38N1O3P1)]\@

### INT3

1\1\GINC-OM103\SP\RM06\6-311+G(d,p)\C26H38N1O5P1\WEIY\25-Oct-2018\0\#\#  
p m06/6-311+g(d,p) geom=check scrf=(iefpcm,smd,solvent=THF)\Title Car  
d Required\0,1\C,0,0.2174569051,0.6348242278,0.279613621\C,0,0.224452  
6303,0.524607096,1.6204435671\P,0,1.6902440278,-0.0159210828,2.6199089  
74\C,0,2.1645994177,-1.6870723196,2.0349169035\C,0,3.6633022612,-1.961  
3313358,1.9651307196\H,0,1.7103383456,-1.8558529571,1.0529735921\H,0,1  
.6654881566,-2.3726335864,2.7379989424\C,0,3.941966477,-3.4358472078,1  
.7078965392\H,0,4.1039225536,-1.3529845282,1.1618227237\H,0,4.16487481

16,-1.6627966291,2.8995343309\C,0,5.4273264959,-3.7277374108,1.5841135  
677\H,0,3.5063208852,-4.0328629543,2.5257425939\H,0,3.4174064399,-3.74  
8828333,0.7912339644\H,0,5.6186059293,-4.7920464338,1.4037607434\H,0,5  
.8725597805,-3.163169439,0.7537862734\H,0,5.9636283743,-3.4440001018,2  
.5000002188\C,0,3.0046668417,1.2377843613,2.4203192916\C,0,2.538084615  
1,2.6627911885,2.7208717325\H,0,3.4093041114,1.1581871237,1.4053382567  
\H,0,3.80370895,0.9429149059,3.1188670891\C,0,3.7109353228,3.633357672  
3,2.7152901853\H,0,1.7996720943,2.971201913,1.9636539215\H,0,2.0039959  
955,2.716202164,3.6813820926\C,0,3.2632143544,5.0647271431,2.956729910  
3\H,0,4.4353494731,3.3317046595,3.4889610394\H,0,4.2463409092,3.560083  
1921,1.7545365425\H,0,4.11128537,5.7597393027,2.9668534529\H,0,2.56794  
1991,5.3973556059,2.1739956391\H,0,2.740600163,5.1557961092,3.91780067  
9\C,0,1.459552091,-0.2007613668,4.4227316231\C,0,2.6137488208,-0.91743  
14082,5.1207918843\H,0,0.5194389006,-0.7505159577,4.5640177421\H,0,1.3  
058576097,0.7955128684,4.8565750223\C,0,2.3496866891,-0.9754695085,6.6  
219003352\H,0,2.7448087973,-1.9447450037,4.7412058978\H,0,3.5723562729  
, -0.3978811319,4.9492825599\C,0,3.485437616,-1.6404342744,7.3795150838  
\H,0,2.1805900888,0.0450138916,6.9970553075\H,0,1.4070186958,-1.515641  
0961,6.7964861234\H,0,3.2817605743,-1.683425439,8.4558598974\H,0,3.647  
9461723,-2.6699295595,7.0307290051\H,0,4.4287034002,-1.0935079215,7.24  
21841794\O,0,-0.3361039321,1.6738230069,3.4741125541\C,0,-0.9568139404  
,0.9506281873,2.4694372554\C,0,-2.059906869,1.6944346341,1.768229859\C  
,0,-1.6889568246,-0.3700523968,2.884048789\C,0,-3.216019113,0.91312456  
81,1.7664937943\C,0,-2.0752882999,2.9740521394,1.2533478102\C,0,-4.403  
6285439,1.3788470056,1.2271575127\C,0,-3.2623536178,3.4619417844,0.699  
3184966\H,0,-1.1753033789,3.588360371,1.2967574019\C,0,-4.4053544118,2  
.6682953897,0.689285651\H,0,-5.3073082268,0.7720396632,1.2339872808\H,  
0,-3.2975736174,4.4684326028,0.2875405789\H,0,-5.3267257961,3.06062017  
2,0.2619456337\N,0,-2.959133469,-0.3234191388,2.3607644507\C,0,-3.9551  
05742,-1.3257464879,2.6345144465\H,0,-4.727539003,-0.9288097949,3.3068  
496856\H,0,-4.4257228934,-1.6724002791,1.705302591\H,0,-3.452618431,-2  
.1656481675,3.1219821839\O,0,-1.168876267,-1.3531488051,3.3797430392\C  
,0,1.3106129677,0.3330793669,-0.6650130315\O,0,2.4263060149,-0.0064605  
682,-0.2993427529\C,0,0.9652627804,0.4750781284,-2.1199090316\H,0,0.64  
94092277,1.5048757629,-2.3358732176\H,0,1.8279836195,0.2172798134,-2.7  
391988242\H,0,0.1154191796,-0.1715627099,-2.3773116855\H,0,-0.70858927  
7,1.00276408,-0.1697939823\C,0,-1.0303204801,1.6998192261,4.8312017258  
\O,0,-0.2977724653,2.2341220207,5.6436860906\O,0,-2.1281931689,1.15436  
37912,4.7927053383\\Version=ES64L-G16RevA.03\State=1-A\HF=-1785.338296  
1\RMSD=4.409e-09\Dipole=1.9359231,-1.7295306,-4.6400339\Quadrupole=10.  
0002373,-1.309184,-8.6910533,3.7581555,20.8636671,-13.1621235\PG=C01 [X  
X(C26H38N1O5P1)]\@

## TS2

1\1\GINC-OM111\SP\RM06\6-311+G(d,p)\C26H38N1O5P1\WEIY\25-Oct-2018\0\#\#

p m06/6-311+g(d,p) geom=check scrf=(iefpcm,smd,solvent=THF)\Title Card Required\0,1\C,0,0.0558821806,-2.3990531342,0.9005343978\C,0,0.2872985225,-1.2133491168,0.3111750252\P,0,-0.9496844196,0.1161973679,0.3732970742\C,0,-2.3335740241,-0.2707348622,-0.7600514351\C,0,-3.7222201831,0.1062743348,-0.2558942176\H,0,-2.2768368759,-1.3482356849,-0.9645670676\H,0,-2.0984226787,0.2509324816,-1.7017941004\C,0,-4.7893484229,-0.1926230833,-1.3001809891\H,0,-3.9371696006,-0.4575344928,0.6631361292\H,0,-3.766107829,1.1764919841,0.0092766139\C,0,-6.1844360441,0.1528581576,-0.8087739558\H,0,-4.5645051897,0.3661738683,-2.2225842681\H,0,-4.7373820916,-1.2586036292,-1.5703976938\H,0,-6.9459258971,-0.0626166888,-1.5672603943\H,0,-6.4388511266,-0.422210928,0.0915937296\H,0,-6.2624423795,1.2185398299,-0.552881113\C,0,-1.4425902676,0.4962324137,2.0907984355\C,0,-0.2396615208,0.8466076699,2.9656651544\H,0,-1.9832612306,-0.3652831122,2.4933159369\H,0,-2.1572063561,1.3317402298,2.042813231\C,0,-0.6535024624,1.1065116442,4.4078522598\H,0,0.5006148243,0.0321987493,2.9329883943\H,0,0.2811137939,1.7376153776,2.5756866772\C,0,0.5396783172,1.4497091729,5.2832514831\H,0,-1.3945750215,1.9218529607,4.4376911376\H,0,-1.1669971333,0.2153593875,4.8017353149\H,0,0.2444388671,1.616707927,6.3257820564\H,0,1.2821155418,0.6412199027,5.2672328552\H,0,1.0411896903,2.3601229554,4.9277451119\C,0,-0.2412224228,1.6895904547,-0.2336492873\C,0,-1.1286545363,2.9158069956,-0.0448267919\H,0,-0.0258353564,1.5547896369,-1.3012267454\H,0,0.7297589529,1.8492232503,0.2573825604\C,0,-0.4886071901,4.1359323443,-0.6972386704\H,0,-2.1247798501,2.7479271747,-0.4883254888\H,0,-1.2957407017,3.1244271487,1.0243370063\C,0,-1.3118187001,5.396961093,-0.5048887366\H,0,0.5223877903,4.2728296011,-0.2797510212\H,0,-0.3423653287,3.9337248963,-1.7700255217\H,0,-0.8385776916,6.2648604194,-0.9784999664\H,0,-2.3144535351,5.2871331426,-0.9402528508\H,0,-1.4390799817,5.6290522897,0.5613231287\C,0,1.6960934197,-1.0581970757,-0.3248252698\C,0,1.7500376451,-0.1643748499,-1.561659537\C,0,2.548070636,-0.2243805189,0.6927147933\C,0,2.6528818338,0.878043877,-1.3188214963\C,0,1.1156449345,-0.241242557,-2.7890090198\C,0,2.9234789918,1.8581303862,-2.258704664\C,0,1.3712734789,0.7429952629,-3.7525104392\H,0,0.434143148,-1.0657691428,-2.9908649233\C,0,2.2632141903,1.7761149914,-3.4881978013\H,0,3.622503456,2.6668138328,-2.0499905609\H,0,0.8757392965,0.6902944751,-4.7202901126\H,0,2.4567612142,2.5327050504,-4.2470974776\N,0,3.1281817833,0.8176381798,-0.0045277064\C,0,4.0483011329,1.7540382913,0.582549642\H,0,5.0143171675,1.740388928,0.0607942255\H,0,3.6432742297,2.7769071821,0.5468431574\H,0,4.1961783601,1.4577192891,1.6252211283\O,0,2.7041130635,-0.4498790855,1.8732561129\C,0,-1.2022000128,-2.8819325728,1.4848741174\O,0,-2.2489549659,-2.2460791601,1.4004920934\C,0,-1.1454990177,-4.2256509865,2.1452628548\H,0,-0.3590142652,-4.2428745263,2.9114683604\H,0,-2.1122896721,-4.4772650397,2.5888503424\H,0,-0.8694532445,-4.9879880708,1.4037708229\H,0,0.9024813552,-3.0895991005,0.8479910371\O,0,0.5103443293,-3.0490448193,-1.9996762609\C,0,1.6030168352,-3.4575575177,-1.7226011474\O,0,2.334414069

3,-2.2306576303,-0.4685523417\O,0,2.4588361755,-4.2694332219,-1.810785  
3275\\Version=ES64L-G09RevE.01\State=1-A\HF=-1785.323461\RMSD=6.563e-0  
9\Dipole=-3.5430893,4.9984704,1.3339517\Quadrupole=-2.4647121,-2.41592  
69,4.8806389,22.0857367,2.8741428,-15.0945151\PG=C01 [X(C26H38N1O5P1)]  
\\@

#### INT4

1\1\GINC-OM112\SP\RM06\6-311+G(d,p)\C26H38N1O5P1\WEIY\25-Oct-2018\0\#\n  
p m06/6-311+g(d,p) geom=check scrf=(iefpcm,smd,solvent=THF)\Title Car  
d Required\0,1\C,-0.0655920003,-2.5508010112,0.1553790007\C,0.2029610  
009,-1.2753170056,-0.2098650009\P,-1.0106800045,0.0536280002,0.1030100  
005\C,-2.6333740116,-0.3001850013,-0.6607460029\C,-3.851320017,0.03432  
70002,0.1898360008\H,-2.6342690116,-1.354708006,-0.9529490042\H,-2.619  
1930115,0.2652040012,-1.6040910071\C,-5.1386640226,-0.2401010011,-0.57  
70160025\H,-3.8377280169,-0.5696220025,1.1074740049\H,-3.8387440169,1.  
0916040048,0.5048410022\C,-6.3760890281,0.0713740003,0.2465270011\H,-5  
.1441130226,0.3500890015,-1.5071270066\H,-5.1485570227,-1.2958630057,-  
0.8889810039\H,-7.2970220321,-0.1378840006,-0.3103490014\H,-6.39877802  
82,-0.5294590023,1.1657630051\H,-6.3997470282,1.129093005,0.5434600024  
\C,-1.0850600048,0.2941950013,1.9159720084\C,0.2867340013,0.5853360026  
,2.5229770111\H,-1.5213030067,-0.6080940027,2.3568370104\H,-1.78398000  
79,1.1200360049,2.1160510093\C,0.1991230009,0.8863820039,4.0126230177\  
H,0.9513720042,-0.2813960012,2.3656880104\H,0.7767020034,1.4348600063,  
2.0161170089\C,1.5700110069,1.1035490049,4.6293070204\H,-0.4309880019,  
1.7768470078,4.1657600183\H,-0.3174360014,0.0579770003,4.5219090199\H,  
1.5045060066,1.365086006,5.6918530251\H,2.1846750096,0.1961170009,4.54  
822102\H,2.1082560093,1.9152180084,4.1185650181\C,-0.5380760024,1.6928  
600075,-0.5390720024\C,-1.5259460067,2.8073060124,-0.2061600009\H,-0.4  
46418002,1.5736050069,-1.6245130072\H,0.457089002,1.9592910086,-0.1634  
570007\C,-1.0379440046,4.1326040182,-0.7805770034\H,-2.5245560111,2.58  
22330114,-0.6138630027\H,-1.6517320073,2.9177180128,0.8837730039\C,-1.  
9903920088,5.2771380232,-0.4827280021\H,-0.0380980002,4.3517380192,-0.  
3725250016\H,-0.900775004,4.0249430177,-1.8679750082\H,-1.6237590071,6  
.2259540274,-0.8915220039\H,-2.9823310131,5.0902910224,-0.916029004\H,  
-2.1237250094,5.4110020238,0.5996290026\C,1.5733810069,-1.0990630048,-  
0.9369990041\C,2.0973940092,0.3029930013,-1.1517490051\C,2.6088100115,  
-1.6328260072,0.1085470005\C,2.9879700132,0.6132580027,-0.1203800005\C  
,1.9447100086,1.1828200052,-2.2068390097\C,3.6079570159,1.8492110081,-  
0.0255790001\C,2.5839900114,2.4244790107,-2.1514290095\H,1.3019490057,  
0.913244004,-3.0426990134\C,3.3754090149,2.7627150122,-1.0581440047\H,  
4.2797700188,2.0890570092,0.7968630035\H,2.4574760108,3.1336240138,-2.  
9671460131\H,3.852236017,3.7407380165,-1.0174250045\N,3.188951014,-0.5  
140850023,0.686551003\C,4.1691450184,-0.5943290026,1.7376330077\H,5.16  
27690227,-0.2930940013,1.3777260061\H,3.8842530171,0.0542760002,2.5782  
670114\H,4.2103990185,-1.6338960072,2.0749680091\O,2.8248670124,-2.774

4660122,0.4371970019\C,-1.2498860055,-3.0954470136,0.8272390036\O,-2.1838420096,-2.4038920106,1.2193970054\C,-1.2445280055,-4.5846830202,1.0208590045\H,-1.1854770052,-5.0905580224,0.0476660002\H,-0.3535500016,-4.8926370215,1.584405007\H,-2.1477760095,-4.9007250216,1.5490250068\H,0.6932180031,-3.2874980145,-0.1114200005\O,-0.3849590017,-0.7503600033,-2.4555590108\C,0.3850590017,-1.6421400072,-2.9157820128\O,1.5548340068,-1.8838710083,-2.0771480091\O,0.3426320015,-2.3291800103,-3.9084860172\\Version=ES64L-G16RevA.03\State=1-A\HF=-1785.3308269\RMSD=4.474e-09\Dipole=-0.739608,3.7666997,4.7640641\Quadrupole=12.6561275,5.6012568,-18.2573843,9.61004,9.9887878,-18.0413742\PG=C01 [X(C26H38N1O5P1)]\@

### TS3

1\1\GINC-OM112\SP\RM06\6-311+G(d,p)\C26H38N1O5P1\WEIY\25-Oct-2018\0\#\p m06/6-311+g(d,p) scrf=(iefpcm,smd,solvent=THF)\Title Card Required\0,1\C,0,-0.034701,-2.596496,0.127798\C,0,0.16625,-1.337396,-0.465174\P,0,-1.057617,-0.017302,0.036222\C,0,-2.664044,-0.183896,-0.828573\C,0,-3.887932,0.105092,0.032157\H,0,-2.70599,-1.20474,-1.219749\H,0,-2.608573,0.499949,-1.690211\C,0,-5.16725,0.002396,-0.787696\H,0,-3.918298,-0.618203,0.85821\H,0,-3.832184,1.111132,0.482336\C,0,-6.406471,0.271323,0.048509\H,0,-5.121079,0.709235,-1.632143\H,0,-5.223718,-1.001883,-1.234824\H,0,-7.324086,0.189688,-0.546078\H,0,-6.482332,-0.443003,0.87927\H,0,-6.38037,1.280335,0.483283\C,0,-1.139615,0.12784,1.857215\C,0,0.213311,0.381551,2.516095\H,0,-1.599452,-0.789184,2.23743\H,0,-1.834351,0.953724,2.074198\C,0,0.066666,0.580955,4.018961\H,0,0.87921,-0.476312,2.325788\H,0,0.713184,1.266241,2.082362\C,0,1.404891,0.783404,4.707579\H,0,-0.589983,1.445398,4.207899\H,0,-0.449151,-0.291576,4.448362\H,0,1.289094,0.936106,5.787012\H,0,2.056632,-0.089923,4.564091\H,0,1.929135,1.661684,4.303417\C,0,-0.503149,1.646509,-0.500878\C,0,-1.431352,2.79235,-0.107359\H,0,-0.412707,1.605059,-1.594507\H,0,0.503415,1.850406,-0.11649\C,0,-0.905675,4.116342,-0.649898\H,0,-2.451994,2.625248,-0.488056\H,0,-1.518373,2.865428,0.98952\C,0,-1.782413,5.292354,-0.257058\H,0,0.124315,4.268056,-0.288484\H,0,-0.828812,4.049365,-1.746856\H,0,-1.394689,6.238119,-0.653379\H,0,-2.805713,5.167815,-0.636638\H,0,-1.84693,5.391104,0.835246\C,0,1.659954,-1.092254,-0.866008\C,0,2.115729,0.306395,-1.186395\C,0,2.599991,-1.464234,0.313649\C,0,2.913383,0.76319,-0.133926\C,0,1.947192,1.084344,-2.314684\C,0,3.4433,2.043104,-0.11843\C,0,2.490125,2.372524,-2.331191\H,0,1.380422,0.708799,-3.165924\C,0,3.202706,2.849648,-1.23541\H,0,4.050224,2.398104,0.71258\H,0,2.355816,3.00463,-3.206387\H,0,3.610212,3.858963,-1.256697\N,0,3.106208,-0.264185,0.79423\C,0,4.000425,-0.187907,1.919262\H,0,5.020282,0.07023,1.601536\H,0,3.648018,0.565597,2.637472\H,0,4.013423,-1.171204,2.399113\O,0,2.841122,-2.551465,0.774262\C,0,-1.256997,-3.034707,0.683837\O,0,-2.253813,-2.292148,0.823091\C,0,-1.353851,-4.471541,1.131493\H,0,-1.818972,-5.066202,0.333567\H,0,-0.375564,-4.912705,1.35148\H,0,-2.003273,-4.540276,2.011074\H,0,0.775419,-3.315226,0.033696\O,0,-0.276564,-1.2883

93,-2.169536\C,0,0.703561,-1.920932,-2.7656\O,0,1.838702,-1.95592,-1.9  
62105\O,0,0.71735,-2.420936,-3.855102\\Version=ES64L-G16RevA.03\State=  
1-A\HF=-1785.3138884\RMSD=4.431e-09\Dipole=-0.2471048,4.9272113,3.0668  
449\Quadrupole=9.9136444,-1.8853168,-8.0283276,8.6122117,10.0371399,-1  
2.7646342\PG=C01 [X(C26H38N1O5P1)]\@\

## INT5

1\1\GINC-OM103\SP\RM06\6-311+G(d,p)\C26H38N1O5P1\WEIY\30-Oct-2018\0\#\#  
p m06/6-311+g(d,p) geom=check scrf=(iefpcm,smd,solvent=THF)\Title Car  
d Required\0,1\C,0,-0.1224108895,0.0038411693,0.1003622156\C,0,-0.025  
3273298,0.076864503,1.4343715298\P,0,3.5861512493,-0.2170716512,-0.036  
0558515\C,0,3.8050444702,-1.7940181559,-1.0257181898\C,0,4.1247754944,  
-1.7351094624,-2.5148365368\H,0,2.8766110378,-2.3712886991,-0.88660110  
8\H,0,4.5819838212,-2.3725696177,-0.4975595498\C,0,4.3135500794,-3.121  
4495614,-3.1172876207\H,0,3.3125172866,-1.2200283361,-3.0539513087\H,0  
,5.0301773832,-1.1353939432,-2.6991377775\C,0,4.5977595759,-3.07526823  
89,-4.6091103858\H,0,5.1362153902,-3.634194076,-2.5931330278\H,0,3.412  
9469471,-3.7264495459,-2.9238042301\H,0,4.7354173941,-4.0777939618,-5.  
0320042215\H,0,3.7729993897,-2.5947978234,-5.153599084\H,0,5.508238189  
7,-2.4973010277,-4.8197515499\C,0,3.1269969919,1.0071012653,-1.3660473  
654\C,0,2.9635829301,2.422523993,-0.8282507355\H,0,2.1634544317,0.6598  
213733,-1.7790440127\H,0,3.8386964137,0.9938011506,-2.2067345152\C,0,2  
.4701852273,3.4107814645,-1.8751296391\H,0,2.255908526,2.4166848217,0.  
0159498201\H,0,3.9229146888,2.7829674831,-0.4166852451\C,0,2.221766793  
9,4.7890585852,-1.2866324805\H,0,3.1983605747,3.4700391316,-2.70073090  
03\H,0,1.5349740231,3.0295864523,-2.3167519865\H,0,1.899095776,5.51003  
64771,-2.0480083373\H,0,1.440950265,4.738617704,-0.5136307716\H,0,3.12  
97049647,5.1869095266,-0.810195443\C,0,5.3485864144,0.2741112129,0.340  
7073784\C,0,6.368877286,0.4299088225,-0.777571742\H,0,5.7110680841,-0.  
4672216144,1.0719628469\H,0,5.2731240828,1.2191574722,0.9053755597\C,0  
,7.7107516169,0.9469294423,-0.2739455894\H,0,6.5258100184,-0.538557625  
2,-1.2807737106\H,0,5.9886770384,1.1177597765,-1.5519287271\C,0,8.7365  
959378,1.0864620221,-1.3857389958\H,0,7.5588125982,1.919218749,0.22218  
46968\H,0,8.0907705763,0.2678416144,0.5063435088\H,0,9.6970835039,1.46  
29756228,-1.0134293392\H,0,8.9246073607,0.1196732958,-1.8728656476\H,0  
,8.3850208668,1.780525619,-2.1616881702\C,0,-0.0965365006,1.2324747211  
,2.396779679\C,0,1.0775825906,2.1548919977,2.4979006015\C,0,-1.2826203  
007,2.2012109054,2.1469841379\C,0,0.6051880105,3.4654594836,2.39964884  
66\C,0,2.4140835964,1.8903235937,2.7187125878\C,0,1.470815541,4.544431  
1286,2.4648886884\C,0,3.2968035086,2.9700658852,2.8086081136\H,0,2.771  
4371395,0.8631486731,2.7969422096\C,0,2.8259919567,4.2722471639,2.6696  
240791\H,0,1.1118398911,5.567293304,2.3677004006\H,0,4.3556452082,2.79  
13045211,2.9846434807\H,0,3.5261464766,5.1038359798,2.7290534921\N,0,-  
0.7838177493,3.4777390351,2.2518501315\C,0,-1.5430433383,4.6315896373,  
1.8414389183\H,0,-1.4802489159,5.4282166464,2.5924242087\H,0,-1.170447



6574,5.003296513,0.8758600615\H,0,-2.5852793827,4.3202797018,1.7304437  
067\O,0,-2.4234851818,1.8682178898,1.942969493\C,0,-0.3542140862,1.176  
7891848,-0.7428778333\O,0,-0.2951709269,2.3187804775,-0.3048118215\C,0  
, -0.7060149376,0.8987283762,-2.1791240831\H,0,-0.7654969901,1.83669559  
71,-2.7382574456\H,0,0.0286653205,0.229445779,-2.647454325\H,0,-1.6774  
928969,0.3875153117,-2.228426797\H,0,-0.0841949852,-0.9862458286,-0.35  
2791049\O,0,0.1112981055,-1.0493390139,2.1774709878\C,0,-0.1182335501,  
-0.7657460484,3.5070729051\O,0,-0.3141188638,0.5505103959,3.6471988355  
\O,0,-0.1331378342,-1.5847699203,4.3636666458\\Version=ES64L-G16RevA.0  
3\State=1-A\HF=-1785.3334662\RMSD=3.749e-09\Dipole=1.7244996,1.4139487  
, -2.3706147\Quadrupole=-2.5806771,10.647779,-8.067102,-6.6579588,13.93  
91733,17.3228754\PG=C01 [X(C26H38N1O5P1)]\@

## 2a

1\1\GINC-OM103\SP\RM06\6-311+G(d,p)\C14H11N1O5\WEIY\05-Jun-2018\0\#\#p  
m06/6-311+g(d,p) geom=check scrf=(iefpcm,smd,solvent=Dichloromethane)\  
\Title Card Required\0,1\C,0,-0.056615424,0.4295725282,0.0326648149\C  
,0,-0.111830464,-0.1080419841,1.3221252709\C,0,1.0104088995,-0.6522627  
9,1.9261063132\C,0,2.2066627462,-0.6293960506,1.2011230374\C,0,2.27305  
0877,-0.0859419042,-0.0797788763\C,0,1.1258333806,0.4422354545,-0.6801  
037416\C,0,-2.2450020617,0.6352046056,0.9496544539\H,0,0.9661987611,-1  
.082586686,2.9253760966\H,0,3.104552033,-1.0496892615,1.651260732\H,0,  
3.2175711935,-0.0850931842,-0.6195423921\H,0,1.1580999703,0.8537858947  
, -1.6892029828\N,0,-1.4073609828,0.0098856602,1.8411022326\C,0,-1.8169  
328942,-0.437292807,3.1490063425\H,0,-1.685486883,-1.5233178743,3.2362  
417539\H,0,-1.2358720434,0.0685297403,3.9316751638\H,0,-2.8755465861,-  
0.1902948221,3.2697113801\O,0,-3.3988734171,0.9553706877,1.1229109113\  
C,0,-1.438679497,0.8298269055,-0.3519959905\C,0,-0.6694762383,-3.13614  
66337,0.0879691509\O,0,-1.3847490692,-3.0206917814,1.0020121795\O,0,-2  
.0844597017,-1.2698568762,-1.422070292\C,0,-2.0629335238,-0.0551655452  
, -1.4600686906\C,0,-2.5653709658,0.8869359287,-2.4271000941\H,0,-3.095  
2364293,0.6360433408,-3.3379219458\O,0,0.0748910045,-3.2905818042,-0.7  
923369194\C,0,-2.2628063977,2.1321158961,-1.9871306661\O,0,-1.57841464  
49,2.1682187367,-0.8234831632\C,0,-2.5553795909,3.4569538479,-2.567970  
9464\H,0,-1.6273875457,4.0266168896,-2.703785523\H,0,-3.0652619918,3.3  
602437584,-3.5307241801\H,0,-3.1909771874,4.0302968329,-1.8809665166\\  
Version=ES64L-G16RevA.03\State=1-A\HF=-970.717971\RMSD=7.470e-09\Dipol  
e=1.3113455,1.3685453,0.025662\Quadrupole=-6.3002858,-3.2184002,9.5186  
86,-3.6583348,6.8294757,-14.5269342\PG=C01 [X(C14H11N1O5)]\@

## TS4

1\1\GINC-OM103\SP\RM06\6-311+G(d,p)\C14H11N1O5\WEIY\05-Jun-2018\0\#\#p  
m06/6-311+g(d,p) geom=check scrf=(iefpcm,smd,solvent=Dichloromethane)\  
\Title Card Required\0,1\C,0,0.0024041145,-0.0800706647,0.0237077903\  
C,0,-0.0728733963,-0.0299806859,1.4252797661\C,0,1.0713165504,0.108729

2865,2.1914963012\C,0,2.2928585451,0.1957445451,1.5155708958\C,0,2.372  
849346,0.1453117496,0.1238885096\C,0,1.213507112,0.0044015202,-0.63945  
73093\C,0,-2.2589273777,-0.2722994827,0.7801304697\H,0,1.0286730142,0.  
1446930311,3.2784649107\H,0,3.2073571564,0.3026671417,2.0967095603\H,0  
,3.3418658502,0.2105640477,-0.365557605\H,0,1.2554007639,-0.0447963582  
, -1.7277240522\N,0,-1.3965401906,-0.1419015625,1.8479550871\C,0,-1.829  
2283498,-0.162272945,3.2236626096\H,0,-1.3799110287,-1.0098204719,3.75  
68448965\H,0,-1.5571613693,0.7734305566,3.7287361618\H,0,-2.9173979224  
, -0.2709977341,3.2298132214\O,0,-3.4597856018,-0.3725916603,0.80238658  
69\C,0,-1.3572593291,-0.2392605947,-0.4567088883\C,0,-1.4204441212,-2.  
7647908309,-1.4211619179\O,0,-1.2945620998,-2.2991883553,-0.2716689128  
\O,0,-1.7606576728,-1.6165350725,-2.3949693019\C,0,-1.8283180515,-0.44  
08414114,-1.8614754248\C,0,-2.2898504088,0.6667826975,-2.5191417186\H,  
0,-2.6701828901,0.6329279197,-3.5346422533\O,0,-1.3575874091,-3.824603  
9812,-1.9659483159\C,0,-2.2488962408,1.8265696933,-1.7058364932\O,0,-1  
.7603556873,1.710614174,-0.5513568733\C,0,-2.7815943019,3.1452846649,-  
2.1496125852\H,0,-2.2332053058,3.9597507111,-1.6667251805\H,0,-2.74126  
06972,3.2514761629,-3.2389561596\H,0,-3.8333813475,3.2192757023,-1.841  
1384938\\Version=ES64L-G16RevA.03\State=1-A\HF=-970.6455038\RMSD=2.907  
e-09\Dipole=1.2644644,3.9495885,0.712512\Quadrupole=3.0098324,-16.1691  
016,13.1592692,-5.9401427,6.2714871,-14.0000682\PG=C01 [X(C14H11N1O5)]  
\@

## INT6

1\1\GINC-OM103\SP\RM06\6-311+G(d,p)\C14H11N1O5\WEIY\05-Jun-2018\0\#\#p  
m06/6-311+g(d,p) geom=check scrf=(iefpcm,smd,solvent=Dichloromethane)\  
\Title Card Required\0,1\C,0,-0.056615424,0.4295725282,0.0326648149\C  
,0,-0.111830464,-0.1080419841,1.3221252709\C,0,1.0104088995,-0.6522627  
9,1.9261063132\C,0,2.2066627462,-0.6293960506,1.2011230374\C,0,2.27305  
0877,-0.0859419042,-0.0797788763\C,0,1.1258333806,0.4422354545,-0.6801  
037416\C,0,-2.2450020617,0.6352046056,0.9496544539\H,0,0.9661987611,-1  
.082586686,2.9253760966\H,0,3.104552033,-1.0496892615,1.651260732\H,0,  
3.2175711935,-0.0850931842,-0.6195423921\H,0,1.1580999703,0.8537858947  
, -1.6892029828\N,0,-1.4073609828,0.0098856602,1.8411022326\C,0,-1.8169  
328942,-0.437292807,3.1490063425\H,0,-1.685486883,-1.5233178743,3.2362  
417539\H,0,-1.2358720434,0.0685297403,3.9316751638\H,0,-2.8755465861,-  
0.1902948221,3.2697113801\O,0,-3.3988734171,0.9553706877,1.1229109113\  
C,0,-1.438679497,0.8298269055,-0.3519959905\C,0,-0.6694762383,-3.13614  
66337,0.0879691509\O,0,-1.3847490692,-3.0206917814,1.0020121795\O,0,-2  
.0844597017,-1.2698568762,-1.422070292\C,0,-2.0629335238,-0.0551655452  
, -1.4600686906\C,0,-2.5653709658,0.8869359287,-2.4271000941\H,0,-3.095  
2364293,0.6360433408,-3.3379219458\O,0,0.0748910045,-3.2905818042,-0.7  
923369194\C,0,-2.2628063977,2.1321158961,-1.9871306661\O,0,-1.57841464  
49,2.1682187367,-0.8234831632\C,0,-2.5553795909,3.4569538479,-2.567970  
9464\H,0,-1.6273875457,4.0266168896,-2.703785523\H,0,-3.0652619918,3.3

602437584,-3.5307241801\H,0,-3.1909771874,4.0302968329,-1.8809665166\\  
Version=ES64L-G16RevA.03\State=1-A\HF=-970.717971\RMSD=7.470e-09\Dipole=1.3113455,1.3685453,0.025662\Quadrupole=-6.3002858,-3.2184002,9.5186  
86,-3.6583348,6.8294757,-14.5269342\PG=C01 [X(C14H11N1O5)]\\@

### 3a

1\1\GINC-OM103\SP\RM06\6-311+G(d,p)\C13H11N1O3\WEIY\05-Jun-2018\0\#\#p  
m06/6-311+g(d,p) geom=check scrf=(iefpcm,smd,solvent=Dichloromethane)\  
\Title Card Required\\0,1\C,0,-0.166368785,-0.7601959016,0.6598647138\  
C,0,-1.1862223904,0.1250239209,1.0195846773\C,0,-2.4343760392,-0.32946  
91081,1.4110238677\C,0,-2.6349657966,-1.7134200343,1.44047709\C,0,-1.6  
235477455,-2.6037291047,1.0886508397\C,0,-0.3733388258,-2.1245818408,0  
.6837821325\C,0,0.595401513,1.4929937806,0.5683091875\H,0,-3.231290847  
9,0.3587233424,1.6878217631\H,0,-3.6061748169,-2.0996126209,1.74571341  
76\H,0,-1.809119424,-3.675317043,1.1222505203\H,0,0.424831258,-2.80938  
23773,0.3959364413\N,0,-0.7287498378,1.4475770715,0.9358793199\C,0,-1.  
5016122056,2.6114605949,1.2890369344\H,0,-2.3832640763,2.6984793105,0.  
6413427092\H,0,-1.8266458674,2.5600355521,2.3370119429\H,0,-0.86478082  
79,3.4902208791,1.1522745765\O,0,1.3042573944,2.4712915657,0.498104043  
\C,0,1.006060128,0.0480345656,0.222805797\O,0,0.4665800063,0.162893927  
5,-2.1597981867\C,0,1.2990514056,-0.0354118305,-1.300025118\C,0,2.7032  
517769,-0.3618377864,-1.3708898584\H,0,3.2774571835,-0.4821395956,-2.2  
814909923\C,0,3.1694162616,-0.4702413268,-0.1046861725\O,0,2.238851155  
, -0.2838291661,0.8575060901\C,0,4.5250106452,-0.7585368818,0.403487437  
\H,0,4.5055386507,-1.6336329885,1.065384285\H,0,5.222276472,-0.9423606  
094,-0.4188947507\H,0,4.8866026358,0.0902637051,0.998030293\\Version=E  
S64L-G16RevA.03\State=1-A\HF=-782.1518763\RMSD=5.982e-09\Dipole=0.1192  
394,-1.1938843,1.4478248\Quadrupole=15.7568309,-2.9571305,-12.7997004,  
-9.0119482,-7.6820927,2.804658\PG=C01 [X(C13H11N1O3)]\\@

### CO<sub>2</sub>

1\1\GINC-OM103\SP\RM06\6-311+G(d,p)\C1O2\WEIY\06-Jun-2018\0\#\#p m06/6-  
311+g(d,p) scrf=(iefpcm,smd,solvent=Dichloromethane)\Title Card Requi  
red\\0,1\C,0,-0.22388059,-1.30936226,0.\O,0,0.9403027785,-1.30936226,0  
.\O,0,-1.3880639585,-1.30936226,0.\\Version=ES64L-G16RevA.03\State=1-S  
GG\HF=-188.5587642\RMSD=6.072e-09\Dipole=0.,0.,0.\Quadrupole=-2.609253  
,1.3046265,1.3046265,0.,0.,0.\PG=D\*H [O(C1),C\*(O1.O1)]\\@

### (S)-TS3

1\1\GINC-OM103\SP\RM06\6-311+G(d,p)\C48H54F6N3O8P1S1Si1\WEIY\26-Feb-20  
19\0\#\#p m06/6-311+g(d,p) geom=check scrf=(iefpcm,smd,solvent=THF)\Ti  
tle Card Required\\0,1\C,0,1.8053801171,-3.1273340928,0.4008783502\C,0  
,1.6958076772,-2.0306697181,-0.4863125655\P,0,1.4109309048,-0.35767595  
38,0.3562548515\C,0,1.2761913792,1.1028341548,-0.7874656479\C,0,0.5435  
439871,1.2414687445,-2.1218953336\H,0,2.2993474233,1.4558896604,-0.950

8069425\H,0,0.8361179279,1.8560919956,-0.1176362555\C,0,0.8753462196,2  
.6410424278,-2.7056933912\H,0,0.9908643168,0.5553552971,-2.8511764421\  
C,0,-0.0643039411,3.0082550546,-3.8351503701\H,0,1.8973164867,2.529884  
3356,-3.1272899724\H,0,0.2901965053,3.9080444715,-4.3550711106\H,0,-0.  
1151679797,2.194814086,-4.5706281334\H,0,-1.0748837445,3.1954395552,-3  
.4526637662\C,0,2.5691694874,-2.1138694771,-1.7770677011\C,0,3.9378690  
762,-1.4974494669,-1.6848318571\C,0,2.9137453612,-3.6095246123,-2.0345  
511103\C,0,4.870999729,-2.5368136803,-1.5677031294\C,0,4.3767633236,-0  
.1891085165,-1.7204291297\C,0,6.220405488,-2.2906570453,-1.3821773188\  
C,0,5.7359983856,0.0832197064,-1.5437500468\H,0,3.6804187022,0.6237649  
838,-1.9127444784\C,0,6.6381853705,-0.9574793499,-1.3566536387\H,0,6.9  
363136825,-3.1042281335,-1.2826906163\H,0,6.0854308557,1.1135487849,-1  
.5630461833\H,0,7.6955569261,-0.7368426592,-1.2152738975\N,0,4.2473944  
76,-3.7761179615,-1.7360830813\C,0,4.9387765566,-5.0322560614,-1.88166  
14426\H,0,5.7069311329,-4.9660146985,-2.663879741\H,0,5.4126539697,-5.  
3276979064,-0.9372591115\H,0,4.1981150989,-5.784587358,-2.1673247606\  
O,0,2.1481470657,-4.4534787635,-2.4308262751\C,0,1.6348458593,-3.037219  
6893,1.8022666479\O,0,1.5455718632,-1.951379431,2.4054011339\C,0,1.575  
0282145,-4.316889918,2.5984022101\H,0,0.529124133,-4.5115451405,2.8728  
171796\H,0,1.9495210529,-5.1861921701,2.0462802321\H,0,2.1356872433,-4  
.197829094,3.5321759358\H,0,1.9070010325,-4.115968688,-0.0387077021\  
O,0,0.224390777,-2.0226323347,-1.3554133711\C,0,0.4676779928,-1.79436160  
59,-2.6113576888\O,0,1.8044952902,-1.6563834863,-2.8700524849\O,0,-0.3  
502157954,-1.6082885255,-3.4849487928\C,0,-0.1745107543,-0.3107415568,  
1.2460577005\C,0,-0.4660749416,0.8452699535,1.9647379135\C,0,-1.092938  
996,-1.3629135725,1.2339487549\C,0,-1.6586126099,0.9765376923,2.673376  
5501\H,0,0.2189542499,1.6942454859,1.9744156449\C,0,-2.2854571862,-1.2  
728784617,1.9417129625\H,0,-0.8850304965,-2.2676820616,0.6663745454\C,  
0,-2.5510803237,-0.0973526812,2.6563952579\C,0,-3.2785420676,-2.395676  
79,1.9279652744\H,0,-3.195419373,-3.018457627,2.830478682\H,0,-4.30764  
9221,-2.0168196175,1.8937479795\H,0,-3.1223267417,-3.0519894729,1.0632  
569774\C,0,-1.9985517074,2.2543402045,3.3764179911\H,0,-3.0628656034,2  
.4939223048,3.261987992\H,0,-1.7898403459,2.2023802346,4.4547889945\H,  
0,-1.413151659,3.0869505315,2.9674399273\O,0,-3.762826656,0.0272063275  
,3.2880223184\C,0,-3.7473875633,-0.311103723,4.6591429113\H,0,-4.76309  
08099,-0.1529388332,5.031613792\H,0,-3.4617689871,-1.3637043838,4.8098  
960116\H,0,-3.0500184082,0.3247172026,5.2256463673\C,0,2.8975525623,0.  
198418462,1.2617666413\C,0,3.0737283254,1.5459888119,1.5823142913\C,0,  
3.9407247679,-0.6958904283,1.5108630741\C,0,4.2694914379,2.0120609326,  
2.1300950476\H,0,2.2880306385,2.2813237383,1.4050178225\C,0,5.15484772  
07,-0.2643965863,2.0272728012\H,0,3.8167902939,-1.7502935129,1.2703769  
09\C,0,5.3053578895,1.0955969972,2.3222768736\C,0,6.2790083799,-1.2214  
693813,2.2787777141\H,0,7.1610555499,-0.9828908104,1.6677098767\H,0,6.  
6029961702,-1.1890229829,3.3263592898\H,0,5.9781030371,-2.247608547,2.  
0388659265\C,0,4.4329173568,3.4563087277,2.4966435071\H,0,5.1655735378

, 3.5756017356, 3.3022252943\H, 0, 4.7780150076, 4.0597752321, 1.6440695623\H, 0, 3.4802221845, 3.8871642721, 2.8273184564\O, 0, 6.5017164768, 1.5183690739, 2.8477261407\C, 0, 7.3820671373, 2.0517278759, 1.8818491734\H, 0, 6.9669011119, 2.9549978044, 1.4078586596\H, 0, 8.3089448649, 2.3141168286, 2.4002447936\H, 0, 7.6042031981, 1.314648591, 1.093209755\N, 0, -0.8573305138, 0.8439594278, -2.1139164486\C, 0, -1.8794349672, 1.2318392324, -1.3054124045\H, 0, -1.0195663618, 0.0158255475, -2.6880712819\N, 0, -2.8456238837, 0.2499587151, -1.26935597\H, 0, -2.5617597922, -0.6232034168, -1.7093245993\C, 0, -4.0717054938, 0.1341552229, -0.6015307532\C, 0, -4.834708509, -0.9907939223, -0.9204423733\C, 0, -4.532970623, 1.0029556846, 0.3946788898\C, 0, -6.0244145663, -1.2537594268, -0.2527495285\H, 0, -4.4916154374, -1.6835571663, -1.6901520783\C, 0, -5.7224539157, 0.7214913859, 1.0475049574\H, 0, -3.9445244287, 1.8727765816, 0.6641784507\C, 0, -6.4841231918, -0.4018051764, 0.73911284\H, 0, -7.4086159889, -0.6097044595, 1.2719789256\C, 0, -6.2233669421, 1.6211593026, 2.1380322399\C, 0, -6.7348790911, -2.5325560228, -0.5716656363\F, 0, -7.9390789902, -2.602836722, -0.0006652562\F, 0, -6.0233563929, -3.5865496788, -0.1430484431\F, 0, -6.8986468037, -2.6912872171, -1.89028351\F, 0, -7.3913387115, 2.182290028, 1.7933236508\F, 0, -5.3751710265, 2.6112390878, 2.4275359597\F, 0, -6.452119331, 0.9386858919, 3.2682882533\O, 0, 0.9403759497, 3.5847978441, -1.6795837577\Si, 0, 0.8910563819, 5.2472578851, -1.6614729069\C, 0, -0.7483035168, 5.9664018622, -2.2141486025\H, 0, -1.5819598284, 5.466237648, -1.7045358139\H, 0, -0.7864575401, 7.0349218614, -1.9596483753\H, 0, -0.9128602822, 5.8790249157, -3.2951517304\C, 0, 2.279776963, 5.9236397045, -2.7333436644\H, 0, 3.2568652653, 5.5447784179, -2.4061809102\H, 0, 2.1507094803, 5.6442180762, -3.7880502165\H, 0, 2.3151075466, 7.020369418, -2.6900293983\C, 0, 1.1776454486, 5.618419079, 0.151238273\H, 0, 2.1721567372, 5.2782853017, 0.4698561969\H, 0, 1.094815187, 6.6879124906, 0.3819100023\H, 0, 0.4287035237, 5.0827201024, 0.7517547457\S, 0, -1.947269093, 2.7083169537, -0.5216858342  
\Version=ES64L-G16RevA.03\State=1-A\HF=-4254.7949394\RMSD=4.006e-09\Dipole=5.8929919, 0.8679889, 0.2783531\Quadrupole=18.2256915, 0.3518175, -18.5775091, -1.5829142, -13.5003715, -11.9450353\PG=C01 [X(C48H54F6N3O8P1S1Si)]\@

(R) -TS3

1\1\GINC-LOCALHOST\FTS\RM06\6-31G(d)\C48H54F6N3O8P1S1Si\YIN\18-Feb-2019\0\#p opt=(calcf,ts,noeigen) 6-31g(d) m06\Title Card Required\0, 1\C, 0.0054677296, 0.0025915745, 0.0041967927\C, 0.0034670532, 0.0004537655, 1.4044765895\P, 1.6732067945, -0.0013898709, 2.2602207453\C, 1.7849796978, -0.3740185665, 4.0756027751\C, 1.1278136156, -1.4192141711, 5.0136131051\H, 1.6317173902, 0.5912802281, 4.5773976476\H, 2.8681423193, -0.5748612086, 4.1188770293\C, 2.0714858431, -1.5903521848, 6.2365298822\H, 0.2546155351, -0.9174189187, 5.4360809045\C, 1.6532016651, -2.7555696098, 7.1097957727\H, 1.9340316405, -0.6558404784, 6.8199516695\H, 2.2107271119, -2.7436181378, 8.0559241179\H, 0.5841639845, -2.6925584994, 7.3503035446\H, 1.8413772887, -3.7068496476, 6.5974678564\C, -1.2888379484, 0.6337192105, 2.0583297143\C

, -1.6990899141, 1.9178684433, 1.398116474\C, -1.0689719734, 1.0956602043, 3.5108354817\C, -1.344160335, 2.9671749564, 2.2516399826\C, -2.2813101538, 2.192056114, 0.1766475117\C, -1.5086186096, 4.2939248535, 1.8985804148\C, -2.4805361135, 3.5259337407, -0.1912582623\H, -2.5973591902, 1.3854181458, -0.4810004281\C, -2.0854395546, 4.557533436, 0.6534932643\H, -1.2090937455, 5.102572225, 2.5629947061\H, -2.947994344, 3.7567393831, -1.1458503074\H, -2.2349500082, 5.5915387393, 0.3475636541\N, -0.8806221187, 2.4536702507, 3.4751728502\C, -0.5237300738, 3.2514839904, 4.6194745449\H, 0.4027502197, 3.805693992, 4.4154409538\H, -1.3237871239, 3.9601048401, 4.8708578715\H, -0.3700046559, 2.5749183995, 5.4650306077\O, -1.0679909754, 0.3877230534, 4.4949089851\C, 1.1391971458, 0.1254685227, -0.8490041873\O, 2.2606827656, 0.4724852084, -0.4503513476\C, 0.9365152735, -0.1831931131, -2.3133339024\H, 1.1749285575, -1.2436707665, -2.4800049428\H, -0.0947910039, -0.019668899, -2.647899095\H, 1.6268168352, 0.412355342, -2.9195162427\H, -0.9727674951, -0.1109484854, -0.4652898732\O, -0.4002292667, -1.5728669718, 2.0338096509\C, -1.6818966601, -1.6024372316, 2.2181046624\O, -2.2682251832, -0.3809690523, 2.0332448846\O, -2.3331053402, -2.580037533, 2.5244669704\C, 2.7913258444, -1.2131952224, 1.5103982762\C, 4.1561456232, -0.9736367067, 1.6512395826\C, 2.3455414364, -2.3684229725, 0.8704939515\C, 5.0954188269, -1.8708871482, 1.1521662969\H, 4.5171410609, -0.065198658, 2.1364325784\C, 3.2601781694, -3.2771123228, 0.3456770936\H, 1.2794845119, -2.5743619155, 0.7793428111\C, 4.624875533, -3.0102446923, 0.4920448112\C, 2.8150009277, -4.5500568424, -0.3045524149\H, 3.2835364817, -4.6948267283, -1.2866516504\H, 3.101107175, -5.4161631443, 0.3105172453\H, 1.7257877876, -4.5696751923, -0.4391668494\C, 6.5630941624, -1.6184987465, 1.3182793228\H, 7.1164991968, -2.5607501605, 1.4018207386\H, 6.9825419068, -1.0642579874, 0.4660974686\H, 6.7575356503, -1.0218267688, 2.2183802088\O, 5.5232171046, -3.9295382715, 0.0076159707\C, 6.0078956323, -3.6221700062, -1.282003944\H, 6.6609479081, -4.4463273739, -1.584182623\H, 5.1854225574, -3.5274087323, -2.0082130099\H, 6.5850145685, -2.6841989641, -1.2884435199\C, 2.3188322913, 1.7019059393, 2.2556037781\C, 3.3021824479, 2.1069923229, 3.1660347537\C, 1.7915434323, 2.6414072984, 1.3680905066\C, 3.7752245951, 3.4160727626, 3.1840848293\H, 3.7241212728, 1.4068109331, 3.8871315602\C, 2.2302735703, 3.9625925633, 1.3666714626\H, 1.020433623, 2.3480052325, 0.6564581631\C, 3.2299999778, 4.3287790946, 2.2743990239\C, 1.645503746, 4.9619612055, 0.4162837223\H, 1.5025665068, 5.9357228868, 0.9007554056\H, 2.2983521078, 5.1262465998, -0.4526629959\H, 0.677800186, 4.6124908, 0.0358338698\C, 4.8208288019, 3.8548162417, 4.1631640823\H, 5.7625142999, 4.1219565832, 3.6641005976\H, 4.4980004225, 4.7459994656, 4.7150124123\H, 5.0445015879, 3.0596146307, 4.883705549\O, 3.6585935317, 5.630897872, 2.3204070378\C, 4.7113068077, 5.9193337748, 1.4206068101\H, 4.4048988464, 5.7679643224, 0.3746558323\H, 4.9781696951, 6.9697144705, 1.5673040682\H, 5.5922342567, 5.2903151586, 1.6202418323\N, 0.5291326041, -2.6220244576, 4.4650827947\C, 1.0754144276, -3.6672268552, 3.7851456443\H, -0.472640411, -2.5110862828, 4.3417273376\N, 0.1009455621, -4.3555523956, 3.0947193294\H, -0.7768820439, -3.8472135047, 2.9446542394\C, 0.2663260603, -5.4042851

256,2.1833679494\C,-0.5419220301,-5.3859851416,1.0449049269\C,1.160730  
1742,-6.4603245687,2.3663988261\C,-0.4357959788,-6.391812291,0.0927601  
629\H,-1.2477052446,-4.5662737329,0.9007228283\C,1.2611043129,-7.44838  
04728,1.3939391662\H,1.7842651547,-6.49836324,3.2536478244\C,0.4758247  
293,-7.4274048932,0.2474954193\H,0.574182494,-8.2020747982,-0.50721811  
11\C,2.3229596622,-8.4905171434,1.562732349\C,-1.2422728201,-6.2548921  
776,-1.1600679825\F,-1.2250764918,-7.3650367011,-1.9026077526\F,-0.763  
5631997,-5.2576211887,-1.9218398563\F,-2.5198565485,-5.9586850138,-0.8  
990840709\F,2.131821414,-9.5446291465,0.7621865189\F,2.381819895,-8.94  
28345153,2.8196474408\F,3.5311427239,-7.9850267729,1.2734177469\O,3.40  
49969714,-1.6372688949,5.8289858177\Si,4.8295444868,-2.1170031206,6.53  
6326174\C,4.8939915508,-3.9370935711,6.9720861894\H,4.5513259034,-4.54  
76714937,6.1271782891\H,5.9288443834,-4.2263192223,7.2028981756\H,4.27  
89532363,-4.1907333988,7.8445307434\C,5.1231053937,-1.0871351426,8.082  
1484241\H,5.1251719411,-0.0128065518,7.8564272524\H,4.3409435607,-1.26  
72437214,8.8331355453\H,6.0852462347,-1.3338092753,8.5503366873\C,6.05  
36923683,-1.7309539854,5.174163686\H,6.0141598322,-0.6650277227,4.9072  
5506\H,7.0894771514,-1.9809171218,5.4353947551\H,5.7734240713,-2.30729  
75561,4.2800434075\S,2.699129458,-4.0529788215,3.8046247344\\Version=E  
M64L-G09RevA.01\State=1-A\HF=-4253.8473916\RMSD=4.765e-09\RMSF=4.828e-  
06\Dipole=1.1741337,4.9161352,0.4047803\Quadrupole=-8.5443468,5.368110  
5,3.1762364,-2.178895,-0.7685973,-0.9458754\PG=C01 [X(C48H54F6N3O8P1S1  
Si1)]\@

## 9. X-ray data of **2a**, **3a** and (*R*)-**1n**

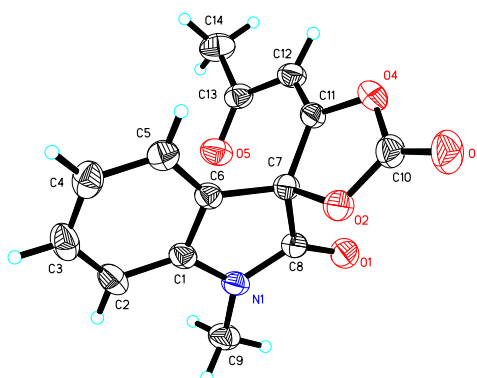

The crystal data of **2a** have been deposited in CCDC with number 1524876. Empirical Formula:  $C_{14}H_{11}NO_5$ ; Formula Weight: 273.24; Crystal Color, Habit: colorless; Crystal Dimensions: 0.200 x 0.170 x 0.120 mm<sup>3</sup>; Crystal System: Monoclinic; Lattice Parameters:  $a = 11.0859(16)$  Å,  $\alpha = 90$  deg.  $b = 9.2256(13)$  Å,  $\beta = 101.245(3)$  deg.  $c = 12.6525(18)$  Å,  $\gamma = 90$  deg.;  $V = 1269.2(3)$  Å<sup>3</sup>; Space group: P 21/c;  $Z = 4$ ;  $D_{calc} = 1.430$  g/cm<sup>3</sup>;  $F_{000} = 568$ ; Diffractometer: Rigaku AFC7R; Residuals: R;  $R_w$ : 0.0416, 0.1097.

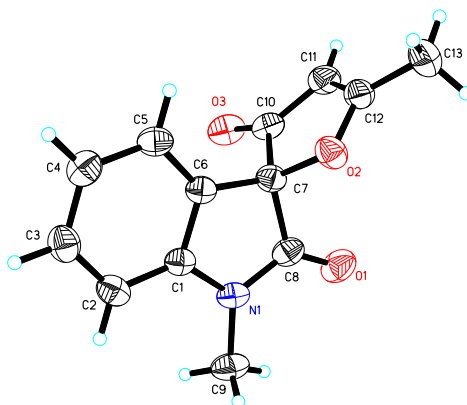

The crystal data of **3a** have been deposited in CCDC with number 1519502. Empirical Formula:  $C_{13}H_{11}NO_3$ ; Formula Weight: 229.23; Crystal Color, Habit: colorless; Crystal Dimensions: 0.200 x 0.170 x 0.130 mm<sup>3</sup>; Crystal System: Monoclinic; Lattice Parameters:  $a = 9.4606(16)$  Å,  $\alpha = 90$  deg.  $b = 8.7844(15)$  Å,  $\beta = 91.450(4)$  deg.  $c = 13.698(2)$  Å,  $\gamma = 90$  deg.;  $V = 1138.0(3)$  Å<sup>3</sup>; Space group: P 21/c;  $Z = 4$ ;  $D_{calc} = 1.338$  g/cm<sup>3</sup>;  $F_{000} = 480$ ; Diffractometer: Rigaku AFC7R; Residuals: R;  $R_w$ : 0.0434, 0.1065.



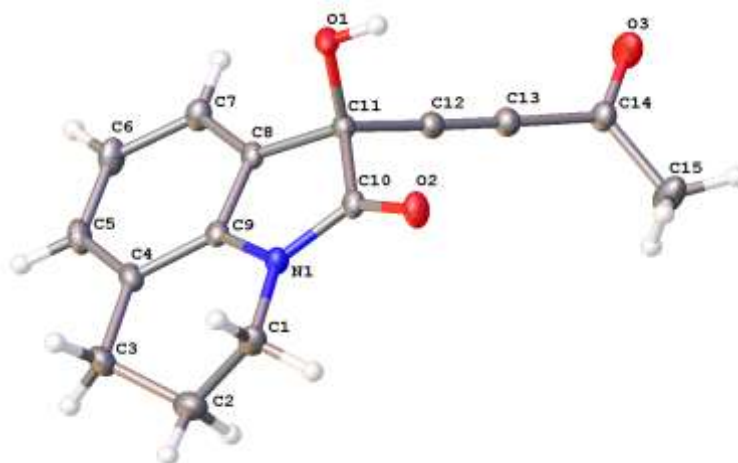

The crystal data of **(R)-1n** have been deposited in CCDC with number 1856499. Empirical Formula:  $C_{15}H_{13}NO_3$ ; Formula Weight: 255.26; Crystal Color, Habit: colorless; Crystal Dimensions: 0.12 x 0.1 x 0.08 mm<sup>3</sup>; Crystal System: Orthorhombic; Lattice Parameters:  $a = 5.27760(10)$  Å,  $\alpha = 90$  deg.  $b = 10.8907(2)$  Å,  $\beta = 90$  deg.  $c = 22.1326(4)$  Å,  $\gamma = 90$  deg.;  $V = 1272.11(4)$  Å<sup>3</sup>; Space group:  $P2_12_12_1$ ;  $Z = 4$ ;  $D_{calc} = 1.333$  g/cm<sup>3</sup>;  $F_{000} = 536$ ; Diffractometer: Rigaku AFC7R; Residuals:  $R$ ;  $R_w$ : 0.0327, 0.0874.

## 10. References:

1. Ando, K.; Houk, K. N.; Busch, J.; Menasse, A.; Sequin, U., Experimental and computational studies of nucleophilic additions of metal hydrides and organometallics to hindered cyclohexanones. *J. Org. Chem.* **1998**, *63* (6), 1761-1766.
2. Mekonnen, A.; Westerlund, A.; Havelkova, M.; Descomps, A.; Carlson, R., Synthesis of 1-Bromo-3-butyn-2-one and 1,3-Dibromo-3-buten-2-one. *Synth. Commun.* **2009**, *39* (14), 2472-2480.
3. Goto, M.; Konishi, T.; Kawaguchi, S.; Yamada, M.; Nagata, T.; Yamano, M., Process Research on the Asymmetric Hydrogenation of a Benzophenone for Developing the Manufacturing Process of the Squalene Synthase Inhibitor TAK-475. *Org. Process Res. Dev.* **2011**, *15* (5), 1178-1184.
4. Busacca, C. A.; Lorenz, J. C.; Grinberg, N.; Haddad, N.; Hrapchak, M.; Latli, B.; Lee, H.; Sabila, P.; Saha, A.; Sarvestani, M.; Shen, S.; Varsolona, R.; Wei, X.; Senanayake, C. H., A Superior Method for the Reduction of Secondary Phosphine Oxides. *Org. Lett.* **2005**, *7* (19), 4277-4280.
5. Isenegger, P. G.; Bächle, F.; Pfaltz, A., Asymmetric Morita–Baylis–Hillman Reaction: Catalyst Development and Mechanistic Insights Based on Mass Spectrometric Back-Reaction Screening. *Chem. Eur. J.* **2016**, *22* (49), 17595-17599.
6. Albert, B. J.; Sivaramakrishnan, A.; Naka, T.; Czaicki, N. L.; Koide, K., Total Syntheses, Fragmentation Studies, and Antitumor/Antiproliferative Activities of FR901464 and Its Low Picomolar Analogue. *J. Am. Chem. Soc.* **2007**, *129* (9), 2648-2659.
